# Supplementary material for: Significantly Different Lipid Profile Analysis of Litopenaeus vannamei under Low-Temperature Storage by UPLC-Q-Exactive Orbitrap/MS
Source: MDPI journal article supplement (doi:10.3390/foods10112624), 2021-10-29
Supplement: s1 [file s1]

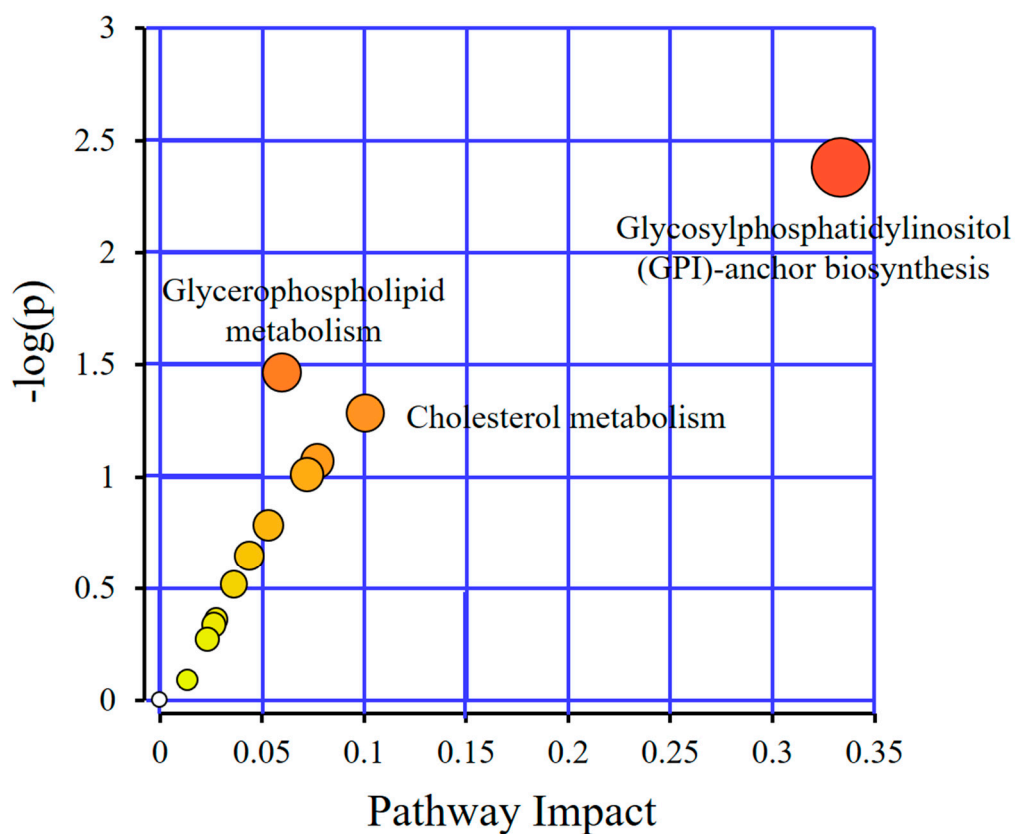

Figure S1. Metabolomic view map of the significant metabolic pathways of *L. vannamei* under low-temperatures storage. The X-axis represents pathway enrichment, and the Y-axis represents the pathway influence. Large sizes and dark colors represent the major pathway enrichment and high pathway impact values, respectively.
