# Supplementary material for: Significantly Different Lipid Profile Analysis of Litopenaeus vannamei under Low-Temperature Storage by UPLC-Q-Exactive Orbitrap/MS
Source: Foods. 2021 Oct 29;10(11):2624. doi: 10.3390/foods10112624 (PMC8622687; doi:10.3390/foods10112624)
Supplement: Supplementary file 1 [file foods-10-02624-s001.zip › Table S1- S3.xlsx]

## Sheet: Table S1
Table S1. Information of lipid molecular species in L. vannamei under low-temperatures storage.
No.	Molecular species	Adduct	Ion (m/z)	Molecular formula	Retention time(min)								Peak Area
					RAW--ESI+	RAW--ESI-	RT--ESI+	RT--ESI-	PFT--ESI+	PFT--ESI-	FT--ESI+	FT--ESI-	RAW	RT	PFT	FT
PC
1	(14:1e)	M+H	466.293	C22H45O7NP	2.732	2.72332	2.726	2.72332	2.732	2.72332	2.771	2.72332	1.66069e+07	479341	1.06865e+07	630881
2	(15:1)	M+Na	516.27	C23H44O8NPNa	2.169	2.162	2.305	2.162	2.184	2.162	2.252	2.162	900411	214444	5.48085e+06	69719.1
3	(17:3)	M+H	518.288	C25H45O8NP	2.305	2.28143	2.058	2.28143	2.28	2.28143	2.057	2.28143	6.69503e+06	330375	8.73801e+06	151849
4	(17:4)	M+H	516.272	C25H43O8NP	2.169	2.185	2.305	2.185	2.183	2.185	2.252	2.185	866127	190686	5.24839e+06	52015.9
5	(12:1e/6:0)	M+Na	544.337	C26H52O7NPNa	3.892	3.886	3.869	3.886	3.887	3.886	3.865	3.886	1.5757e+06	3.82974e+06	2.21621e+06	4.4095e+06
6	(18:5e)	M+H	514.293	C26H45O7NP	2.153	2.17167	2.178	2.17167	2.165	2.17167	2.305	2.17167	1.53797e+07	440332	6.61967e+06	297796
7	(19:2)	M+H	548.335	C27H51O8NP	3.854	3.858	3.755	3.858	3.756	3.858	3.774	3.858	5.66064e+06	1.13376e+06	365796	1.01416e+06
8	(19:2e)	M+H	534.355	C27H53O7NP	2.851	2.9178	2.848	2.9178	2.852	2.9178	2.858	2.9178	1.92036e+06	648627	967183	1.2006e+06
9	(19:3)	M+H	546.319	C27H49O8NP	3.233	3.22728	3.424	3.22728	3.254	3.22728	3.224	3.22728	2.74232e+07	208484	1.53099e+07	108195
10	(19:3e)	M+H	532.34	C27H51O7NP	3.924	3.91936	3.899	3.91936	3.924	3.91936	3.907	3.91936	2.067e+07	4.7934e+07	2.35003e+07	2.74845e+07
11	(19:4)	M+H	544.303	C27H47O8NP	2.931	2.94066	3.142	2.94066	2.912	2.94066	3.172	2.94066	5.13246e+06	379084	1.25605e+07	1.27372e+06
12	(19:4e)	M+H	530.324	C27H49O7NP	1.994	2.00129	2.034	2.00129	1.972	2.00129	2.008	2.00129	5.91744e+06	3.48053e+06	2.29927e+06	1.61234e+06
13	(19:5e)	M+H	528.308	C27H47O7NP	1.701	1.72243	1.726	1.72243	1.705	1.72243	1.75	1.72243	3.39348e+06	2.52744e+06	2.38006e+06	1.51436e+06
14	(20:2)	M+H	562.35	C28H53O8NP	2.527	2.52695	2.522	2.52695	2.713	2.52695	2.56	2.52695	1.9235e+06	2.42926e+06	226835	1.02729e+06
15	(20:4)	M+H	558.319	C28H49O8NP	1.805	1.974	2.204	1.974	1.965	1.974	2.168	1.974	43947.9	11966.7	1.93797e+06	9253.43
16	(21:0e)	M+H	566.418	C29H61O7NP	7.872	7.87136	7.862	7.87136	7.87	7.87136	7.855	7.87136	7.36877e+06	8.1581e+06	2.74388e+06	3.245e+06
17	(21:1e)	M+H	564.402	C29H59O7NP	5.957	5.96174	5.963	5.96174	5.979	5.96174	5.975	5.96174	700178	1.08646e+06	495680	283129
18	(21:2e)	M+H	562.387	C29H57O7NP	4.855	4.64171	4.87	4.64171	4.869	4.64171	4.658	4.64171	971870	1.23386e+06	26039.9	64963
19	(21:4e)	M+H	558.355	C29H53O7NP	2.795	2.77631	2.803	2.77631	2.751	2.77631	2.962	2.77631	3.16969e+06	6.35182e+06	3.4026e+06	3.32687e+06
20	(21:5e)	M+H	556.34	C29H51O7NP	2.074	2.12212	2.19	2.12212	2.062	2.12212	2.186	2.12212	5.02108e+07	2.47996e+07	3.36745e+07	1.64714e+07
21	(22:2)	M+H	590.382	C30H57O8NP	3.651	3.6738	3.654	3.6738	3.631	3.6738	3.674	3.6738	2.20938e+06	2.55756e+06	20678.3	1.3291e+06
22	(23:0e)	M+H	594.449	C31H65O7NP	9.452	9.44785	9.438	9.44785	9.449	9.44785	9.437	9.44785	9.63333e+06	5.89658e+06	2.66385e+06	4.04433e+06
23	(23:1e)	M+H	592.434	C31H63O7NP	7.896	7.89077	7.893	7.89077	7.89	7.89077	7.908	7.89077	785002	1.27413e+06	448522	437970
24	(23:2e)	M+H	590.418	C31H61O7NP	6.763	6.74024	6.81	6.74024	6.701	6.74024	6.723	6.74024	9289.2	218826	3444.49	147425
25	(23:4e)	M+H	586.387	C31H57O7NP	2.939	2.91201	2.885	2.91201	2.938	2.91201	2.919	2.91201	126059	62652.4	1.51075e+06	163468
26	(23:5e)	M+H	584.371	C31H55O7NP	2.278	2.26802	2.274	2.26802	2.257	2.26802	2.29	2.26802	1.03118e+06	361542	6.0326e+06	1.03739e+06
27	(24:3e)	M+H	602.418	C32H61O7NP	8.589	8.61716	8.602	8.61716	8.618	8.61716	8.597	8.61716	1.522e+06	2.72003e+06	589766	1.2953e+06
28	(25:0e)	M+H	622.481	C33H69O7NP	11.071	11.0715	11.05	11.0715	11.078	11.0715	11.055	11.0715	1.52265e+06	1.42121e+06	524408	1.0659e+06
29	(25:1e)	M+H	620.465	C33H67O7NP	9.429	9.42569	9.431	9.42569	9.441	9.42569	9.436	9.42569	997771	1.43767e+06	435778	549666
30	(8:0e/18:1)	M+Na	656.463	C34H68O7NPNa	10.225	10.248	10.246	10.248	10.227	10.248	10.216	10.248	428087	1.43291e+06	366473	464471
31	(26:2e)	M+H	632.465	C34H67O7NP	8.908	8.90443	8.896	8.90443	8.91	8.90443	8.896	8.90443	3.62806e+06	5.3938e+06	2.15799e+06	3.13749e+06
32	(26:3e)	M+H	630.449	C34H65O7NP	7.835	7.815	7.813	7.815	7.828	7.815	7.823	7.815	365950	644695	96195.2	166248
33	(26:4e)	M+H	628.434	C34H63O7NP	8.601	8.60624	8.604	8.60624	8.619	8.60624	8.588	8.60624	1.32916e+06	3.98283e+06	1.11479e+06	2.0017e+06
34	(26:5e)	M+H	626.418	C34H61O7NP	7.358	7.335	7.334	7.335	7.328	7.335	7.34	7.335	509985	5.15288e+06	246433	552935
35	(27:0)	M+H	664.491	C35H71O8NP	10.045	10.05	10.04	10.05	10.06	10.05	10.067	10.05	2.73802e+06	2.57302e+06	2.87222e+06	1.73863e+06
36	(11:0/16:1)	M+H	662.476	C35H69O8NP	11.319	11.334	11.31	11.334	11.29	11.334	11.322	11.334	483089	7.20368e+06	84468.2	631069
37	(28:0)	M+H	678.507	C36H73O8NP	10.799	10.819	10.801	10.819	10.809	10.819	10.82	10.819	7.33769e+07	6.86557e+07	7.91617e+07	6.52678e+07
38	(28:1)	M+H	676.491	C36H71O8NP	9.448	9.45146	9.452	9.45146	9.46	9.45146	9.456	9.45146	1.95577e+06	2.17763e+06	3.81553e+06	1.58911e+06
39	(20:1e/8:0)	M+H	662.512	C36H73O7NP	10.835	10.8	10.801	10.8	10.808	10.8	10.823	10.8	2.86216e+06	1.83341e+06	3.79621e+06	2.52367e+06
40	(28:2)	M+H	674.476	C36H69O8NP	8.326	8.33467	8.331	8.33467	8.316	8.33467	8.348	8.33467	46199.5	823456	1.71082e+06	209791
41	(18:1/10:1)	M+H	674.476	C36H69O8NP	8.84	8.84676	8.827	8.84676	8.848	8.84676	8.849	8.84676	505815	5.51941e+06	8.13302e+06	629301
42	(28:2e)	M+H	660.496	C36H71O7NP	10.437	10.4432	10.466	10.4432	10.437	10.4432	10.449	10.4432	2.53085e+06	3.5834e+06	1.63145e+06	1.9642e+06
43	(28:4e)	M+H	656.465	C36H67O7NP	10.225	10.233	10.246	10.233	10.227	10.233	10.216	10.233	428087	1.43291e+06	366473	464471
44	(28:7)	M+H	664.397	C36H59O8NP	3.318	3.312	3.312	3.312	3.325	3.312	3.059	3.312	2.37708e+06	0	1.20717e+06	0
45	(16:0/13:0)	M+H	692.522	C37H75O8NP	14.2	14.1867	14.206	14.1867	14.179	14.1867	14.161	14.1867	1.34873e+07	1.20204e+07	1.28573e+07	1.48841e+07
46	(29:0e)	M+H	678.543	C37H77O7NP	12.214	12.2426	12.222	12.2426	12.322	12.2426	12.233	12.2426	3.04778e+07	1.80768e+07	1.97923e+07	1.36426e+07
47	(29:1)	M+H	690.507	C37H73O8NP	10.771	10.7591	10.771	10.7591	10.75	10.7591	10.79	10.7591	3.66087e+06	2.87478e+06	2.8705e+06	2.8064e+06
48	(16:1/13:0)	M+H	690.507	C37H73O8NP	12.844	12.89	12.857	12.89	12.854	12.89	12.835	12.89	2.27991e+07	4.9334e+07	1.4657e+07	2.01373e+07
49	(29:1e)	M+H	676.528	C37H75O7NP	10.779	10.788	10.8	10.788	10.804	10.788	10.789	10.788	3.11301e+08	2.89524e+08	3.16558e+08	2.66241e+08
50	(29:2)	M+H	688.491	C37H71O8NP	11.485	11.4518	11.462	11.4518	11.417	11.4518	11.416	11.4518	219667	2.451e+06	0	412605
51	(30:0)	M+H	706.538	C38H77O8NP	12.328	12.3188	12.303	12.3188	12.321	12.3188	12.321	12.3188	4.64474e+08	4.32434e+08	3.79991e+08	3.98303e+08
52	(14:0e/16:0)	M+Na	714.541	C38H78O7NPNa	13.049	13.046	13.013	13.046	13.042	13.046	13.013	13.046	5.63948e+06	4.33404e+06	4.08362e+06	2.61918e+06
53	(30:0e)	M+H	692.559	C38H79O7NP	13.028	13.046	13.047	13.046	13.036	13.046	13.011	13.046	1.71709e+08	1.21818e+08	8.57605e+07	7.76345e+07
54	(17:1/13:0)	M+H	704.522	C38H75O8NP	13.561	13.5465	13.596	13.5465	13.553	13.5465	13.514	13.5465	6.55264e+06	9.10781e+06	5.77334e+06	5.17887e+06
55	(30:1e)	M+H	690.543	C38H77O7NP	12.351	12.3682	12.366	12.3682	12.372	12.3682	12.359	12.3682	4.02375e+07	2.65105e+07	5.66259e+07	5.61117e+07
56	(30:2)	M+H	702.507	C38H73O8NP	9.763	9.75717	9.752	9.75717	9.744	9.75717	9.736	9.75717	1.03635e+07	9.17887e+06	1.30776e+07	8.90321e+06
57	(12:1e/18:1)	M+H	688.528	C38H75O7NP	14.234	14.1588	14.276	14.1588	14.213	14.1588	14.267	14.1588	9.82868e+06	3.12942e+07	1.17458e+06	1.39849e+07
58	(30:3)	M+H	700.491	C38H71O8NP	10.832	10.83	10.833	10.83	10.824	10.83	10.838	10.83	3.07387e+06	3.30539e+06	3.29112e+06	3.83995e+06
59	(12:1e/18:2)	M+H	686.512	C38H73O7NP	13.094	13.0487	13.073	13.0487	13.068	13.0487	13.055	13.0487	8.87454e+06	2.48541e+07	1.89212e+06	1.57143e+07
60	(30:4)	M+H	698.476	C38H69O8NP	7.851	7.84485	7.849	7.84485	7.849	7.84485	7.851	7.84485	96170	684862	845902	105683
61	(30:5e)	M+H	682.481	C38H69O7NP	7.886	7.88348	7.886	7.88348	7.885	7.88348	7.869	7.88348	83467.9	16652.3	817762	103695
62	(31:0)	M+H	720.554	C39H79O8NP	13.068	13.0449	13.055	13.0449	13.057	13.0449	13.058	13.0449	5.55506e+08	4.84493e+08	4.64033e+08	4.31494e+08
63	(31:0e)	M+Na	728.556	C39H80O7NPNa	13.987	13.9957	14.023	13.9957	13.995	13.9957	14.001	13.9957	7.0042e+06	6.18115e+06	7.67521e+06	5.18612e+06
64	(31:1)	M+H	718.538	C39H77O8NP	11.75	11.7052	11.709	11.7052	11.707	11.7052	11.662	11.7052	7.57604e+07	7.26679e+07	5.54407e+07	4.89406e+07
65	(18:1/13:0)	M+H	718.538	C39H77O8NP	14.247	14.2508	14.241	14.2508	14.24	14.2508	14.283	14.2508	2.76885e+08	2.87668e+08	2.61727e+08	3.97356e+08
66	(31:1e)	M+H	704.559	C39H79O7NP	13.13	13.1138	13.136	13.1138	13.146	13.1138	13.127	13.1138	5.19254e+07	4.23404e+07	3.41092e+07	3.17317e+07
67	(14:1e/17:0)	M+H	704.559	C39H79O7NP	15.957	15.9358	15.944	15.9358	16.05	15.9358	15.94	15.9358	6.08421e+06	1.0626e+07	246816	3.62998e+06
68	(31:2)	M+H	716.522	C39H75O8NP	13.096	13.1028	13.095	13.1028	13.105	13.1028	13.125	13.1028	3.41474e+08	2.7602e+08	2.30761e+08	3.1859e+08
69	(31:2e)	M+H	702.543	C39H77O7NP	11.764	11.6494	11.75	11.6494	11.757	11.6494	11.661	11.6494	3.8074e+06	3.89285e+06	4.26632e+06	3.41576e+06
70	(31:3)	M+H	714.507	C39H73O8NP	11.765	11.7457	11.767	11.7457	11.758	11.7457	11.745	11.7457	8.99854e+06	1.17906e+07	4.62601e+06	5.98434e+06
71	(18:3/13:0)	M+H	714.507	C39H73O8NP	12.088	12.0732	12.061	12.0732	12.079	12.0732	12.053	12.0732	4.95151e+07	3.25351e+07	1.23115e+07	2.32203e+07
72	(31:3e)	M+H	700.528	C39H75O7NP	13.189	13.1893	13.204	13.1893	13.207	13.1893	13.166	13.1893	6.71607e+06	5.64237e+06	5.25798e+06	3.20036e+06
73	(31:4)	M+H	712.491	C39H71O8NP	11.29	11.2741	11.319	11.2741	11.307	11.2741	11.23	11.2741	9.46962e+06	2.68224e+06	2.05922e+06	6.7633e+06
74	(31:4e)	M+H	698.512	C39H73O7NP	12.776	12.78	12.779	12.78	12.767	12.78	12.773	12.78	1.50122e+07	2.74428e+07	1.15759e+06	1.29704e+07
75	(9:0/22:5)	M+H	710.476	C39H69O8NP	10.343	10.3337	10.328	10.3337	10.325	10.3337	10.328	10.3337	2.9414e+06	2.51845e+06	729658	862522
76	(31:6e)	M+H	694.481	C39H69O7NP	10.985	10.971	10.948	10.971	10.994	10.971	10.972	10.971	1.22373e+07	2.004e+07	3.20701e+06	2.09573e+07
77	(32:0)	M+H	734.569	C40H81O8NP	13.773	13.7779	13.768	13.7779	13.776	13.7779	13.768	13.7779	3.58184e+09	2.88118e+09	3207104081	3.41111e+09
78	(18:0/14:0)	M+H	734.569	C40H81O8NP	15.897	15.8973	16.07	15.8973	15.805	15.8973	15.721	15.8973	4.87326e+06	4.78004e+06	1.11263e+06	4.01121e+06
79	(32:0e)	M+Na	742.572	C40H82O7NPNa	14.638	14.6379	14.634	14.6379	14.648	14.6379	14.636	14.6379	4.39472e+07	4.26899e+07	3.45144e+07	2.30582e+07
80	(32:1)	M+H	732.554	C40H79O8NP	12.439	12.4555	12.435	12.4555	12.47	12.4555	12.441	12.4555	2.21693e+09	2.0122e+09	1.81484e+09	1.82682e+09
81	(17:1/15:0)	M+Na	754.536	C40H78O8NPNa	13.333	13.2853	13.31	13.2853	13.323	13.2853	13.363	13.2853	1.27317e+07	7.31968e+06	2.83156e+06	5.16153e+06
82	(18:1/14:0)	M+H	732.554	C40H79O8NP	14.716	14.6936	14.788	14.6936	14.779	14.6936	14.665	14.6936	2.05984e+06	1.40761e+06	2.49448e+06	4.85299e+06
83	(32:1e)	M+H	718.575	C40H81O7NP	13.295	13.3079	13.31	13.3079	13.294	13.3079	13.285	13.3079	8.22851e+08	669264694	4.4505e+08	3.96136e+08
84	(32:2)	M+H	730.538	C40H77O8NP	11.477	11.5262	11.526	11.5262	11.532	11.5262	11.522	11.5262	2.54943e+07	1.87419e+07	1.80097e+07	1.29126e+07
85	(18:1/14:1)	M+Na	752.52	C40H76O8NPNa	12.326	12.315	12.331	12.315	12.312	12.315	12.32	12.315	2.1573e+07	1.21638e+07	7.04834e+06	9.64161e+06
86	(32:2e)	M+H	716.559	C40H79O7NP	12.138	12.1285	12.143	12.1285	12.133	12.1285	12.122	12.1285	4.88676e+08	2.70531e+08	2.50549e+08	2.14492e+08
87	(16:2e/16:0)	M+Na	738.541	C40H78O7NPNa	13.212	13.1797	13.219	13.1797	13.224	13.1797	13.213	13.1797	3.27731e+07	4.45159e+07	8.98521e+06	2.18771e+07
88	(14:1e/18:1)	M+H	716.559	C40H79O7NP	15.354	15.3728	15.35	15.3728	15.311	15.3728	15.37	15.3728	5.17487e+06	1.452e+07	705912	1.04187e+07
89	(20:0/12:3)	M+H	728.522	C40H75O8NP	10.492	10.5031	10.468	10.5031	10.558	10.5031	10.597	10.5031	26272081	9.54011e+06	1.11367e+07	3.63569e+06
90	(32:3e)	M+H	714.543	C40H77O7NP	11.885	11.8576	11.878	11.8576	11.877	11.8576	11.884	11.8576	9.75592e+06	1.96069e+07	9.09681e+06	2.65631e+07
91	(32:4)	M+H	726.507	C40H73O8NP	9.474	9.48517	9.468	9.48517	9.474	9.48517	9.493	9.48517	4.98932e+06	3.64747e+06	4.03825e+06	1.79913e+06
92	(32:4e)	M+H	712.528	C40H75O7NP	10.278	10.27	10.287	10.27	10.246	10.27	10.217	10.27	4.8011e+06	2.5275e+06	3.32338e+06	1.72318e+06
93	(14:1e/18:3)	M+H	712.528	C40H75O7NP	13.465	13.4876	13.455	13.4876	13.492	13.4876	13.482	13.4876	5.70666e+06	8.60658e+06	227281	4.58701e+06
94	(12:0/20:5)	M+Na	746.473	C40H70O8NPNa	8.569	8.56677	8.571	8.56677	8.564	8.56677	8.562	8.56677	1.12571e+06	1.12708e+06	1.52255e+06	1.38948e+06
95	(32:5e)	M+H	710.512	C40H73O7NP	9.322	9.33282	9.304	9.33282	9.328	9.33282	9.462	9.33282	1.4005e+06	559669	548478	1.25414e+06
96	(12:1e/20:4)	M+H	710.512	C40H73O7NP	12.571	12.5544	12.549	12.5544	12.535	12.5544	12.541	12.5544	2.87011e+06	6.59573e+06	56487.3	6.14569e+06
97	(32:6e)	M+H	708.496	C40H71O7NP	8.562	8.54351	8.548	8.54351	8.544	8.54351	8.536	8.54351	530383	387281	978352	490551
98	(12:1e/20:5)	M+H	708.496	C40H71O7NP	11.521	11.5562	11.526	11.5562	11.53	11.5562	11.52	11.5562	1.06762e+07	1.85337e+07	1.697e+06	2.14177e+07
99	(33:0)	M+Na	770.567	C41H82O8NPNa	14.271	14.2577	14.24	14.2577	14.21	14.2577	14.284	14.2577	4.10642e+07	3.44712e+07	1.58218e+07	4.58531e+07
100	(18:0/15:0)	M+H	748.585	C41H83O8NP	16.694	16.7013	16.707	16.7013	16.7	16.7013	16.692	16.7013	3.91216e+06	4.95201e+06	1.80391e+06	4.74919e+06
101	(33:0e)	M+H	734.606	C41H85O7NP	15.074	15.0291	15.039	15.0291	14.985	15.0291	15.03	15.0291	1.1124e+08	9.59983e+07	6.78845e+07	4.85514e+07
102	(33:1)	M+H	746.569	C41H81O8NP	13.18	13.1092	13.167	13.1092	13.167	13.1092	13.166	13.1092	1.27383e+09	1.29036e+09	9.11815e+08	1.12947e+09
103	(33:1e)	M+H	732.59	C41H83O7NP	14.01	14.1932	14.028	14.1932	13.997	14.1932	14.003	14.1932	1.7731e+08	2.06981e+08	8.45938e+07	9.0737e+07
104	(16:1e/17:0)	M+H	732.59	C41H83O7NP	17.094	17.0849	17.091	17.0849	17.189	17.0849	17.078	17.0849	537267	2.36835e+06	76470.9	1.404e+06
105	(33:2)	M+H	744.554	C41H79O8NP	12.367	12.3415	12.349	12.3415	12.321	12.3415	12.335	12.3415	3.85071e+07	3.8361e+07	2.41823e+07	4.66173e+07
106	(20:2/13:0)	M+H	744.554	C41H79O8NP	14.341	14.3362	14.335	14.3362	14.334	14.3362	14.321	14.3362	1.34035e+08	1.23695e+08	1.39084e+08	1.82929e+08
107	(33:2e)	M+H	730.575	C41H81O7NP	12.63	12.7003	12.627	12.7003	12.611	12.7003	12.629	12.7003	1.683e+08	9.96909e+07	9.22621e+07	8.44612e+07
108	(16:2e/17:0)	M+Na	752.556	C41H80O7NPNa	13.711	13.7036	13.706	13.7036	13.722	13.7036	13.706	13.7036	3.66733e+07	2.35883e+07	6.84448e+06	1.09897e+07
109	(16:1e/17:1)	M+H	730.575	C41H81O7NP	16.186	16.1869	16.164	16.1869	16.174	16.1869	16.163	16.1869	9.89167e+07	2.7373e+08	2.76497e+07	2.76249e+08
110	(33:3)	M+H	742.538	C41H77O8NP	13.18	13.1734	13.18	13.1734	13.172	13.1734	13.168	13.1734	1.32583e+08	1.3309e+08	9.92331e+07	1.56261e+08
111	(16:2e/17:1)	M+Na	750.541	C41H78O7NPNa	11.1	11.084	11.093	11.084	11.067	11.084	11.091	11.084	6.40331e+06	1.45999e+07	917610	1.24686e+07
112	(33:3e)	M+H	728.559	C41H79O7NP	12.018	12.0014	12.052	12.0014	12.016	12.0014	12	12.0014	1.45317e+07	1.36733e+07	1.46225e+07	1.04801e+07
113	(33:4)	M+Na	762.504	C41H74O8NPNa	10.723	10.737	10.728	10.737	10.744	10.737	10.727	10.737	3.75131e+08	2.84902e+08	2.30439e+08	209880913
114	(20:4/13:0)	M+H	740.522	C41H75O8NP	12.842	12.8438	12.852	12.8438	12.847	12.8438	12.835	12.8438	1.30063e+08	1.23052e+08	4.74778e+07	1.03791e+08
115	(33:4e)	M+H	726.543	C41H77O7NP	13.721	13.7188	13.727	13.7188	13.707	13.7188	13.736	13.7188	6.32371e+07	6.11709e+07	1.98126e+07	2.00996e+07
116	(33:5)	M+H	738.507	C41H73O8NP	11.415	11.3759	11.438	11.3759	11.465	11.3759	11.428	11.3759	1.74433e+06	3.41847e+06	1.1442e+06	1.20573e+06
117	(20:5/13:0)	M+H	738.507	C41H73O8NP	11.819	11.821	11.804	11.821	11.829	11.821	11.804	11.821	4.41279e+08	3.91332e+08	2.55253e+08	3.44766e+08
118	(33:6)	M+H	736.491	C41H71O8NP	10.904	10.8986	10.894	10.8986	10.889	10.8986	10.919	10.8986	2.26276e+06	2.19578e+06	1.88288e+06	1.88811e+06
119	(34:0)	M+Na	784.583	C42H84O8NPNa	15.117	15.1203	15.114	15.1203	15.113	15.1203	15.091	15.1203	5.93148e+07	4.54879e+07	4.23977e+07	4.42626e+07
120	(34:0e)	M+Na	770.603	C42H86O7NPNa	15.902	15.9282	15.899	15.9282	15.915	15.9282	15.921	15.9282	2.7615e+07	2.52395e+07	1.56678e+07	1.47731e+07
121	(34:1)	M+H	760.585	C42H83O8NP	13.883	13.8769	13.885	13.8769	13.865	13.8769	13.883	13.8769	1.02275e+10	8.68693e+09	8.3952e+09	9.38398e+09
122	(17:1/17:0)	M+H	760.585	C42H83O8NP	16.145	16.0474	16.019	16.0474	16.081	16.0474	15.811	16.0474	1.63755e+07	1.72911e+07	1.55204e+07	1.48719e+07
123	(20:1/14:0)	M+H	760.585	C42H83O8NP	17.016	17.1479	17.194	17.1479	17.1	17.1479	17.172	17.1479	4.03509e+06	3.74601e+06	1.61479e+06	4.25273e+06
124	(20:0/14:1)	M+H	760.585	C42H83O8NP	17.992	17.8588	17.661	17.8588	17.682	17.8588	17.871	17.8588	263149	1.49725e+06	547852	788874
125	(34:1e)	M+Na	768.588	C42H84O7NPNa	14.725	14.7094	14.71	14.7094	14.707	14.7094	14.715	14.7094	1.50449e+08	127362240	9.68391e+07	7.52109e+07
126	(14:1e/20:0)	M+H	746.606	C42H85O7NP	17.766	17.7612	17.76	17.7612	17.682	17.7612	17.756	17.7612	628808	2.21996e+06	269286	1.05127e+06
127	(34:2)	M+H	758.569	C42H81O8NP	12.724	12.7226	12.722	12.7226	12.708	12.7226	12.719	12.7226	10848969024	9.34349e+09	7.312e+09	8.23671e+09
128	(16:1/18:1)	M+H	758.569	C42H81O8NP	12.725	12.7424	12.724	12.7424	12.708	12.7424	12.72	12.7424	1.0326e+10	9.14701e+09	7.30826e+09	8023246934
129	(20:1/14:1)	M+H	758.569	C42H81O8NP	17.738	17.7838	17.736	17.7838	17.706	17.7838	17.755	17.7838	290674	317734	108573	362606
130	(34:2e)	M+Na	766.572	C42H82O7NPNa	13.641	13.5883	13.61	13.5883	13.589	13.5883	13.599	13.5883	1.50303e+08	1.27215e+08	1.06428e+08	8.73526e+07
131	(14:1e/20:1)	M+H	744.59	C42H83O7NP	16.932	16.942	16.946	16.942	16.955	16.942	16.74	16.942	2.13291e+07	3.20682e+07	1.5586e+06	4.34724e+06
132	(16:1/18:2)	M+Na	778.536	C42H78O8NPNa	11.355	11.3714	11.359	11.3714	11.356	11.3714	11.369	11.3714	1.92117e+07	1.69035e+07	1.85609e+07	1.88931e+07
133	(34:3)	M+H	756.554	C42H79O8NP	11.358	11.3714	11.37	11.3714	11.383	11.3714	11.376	11.3714	1.06127e+09	8.99698e+08	7.33299e+08	5.78018e+08
134	(16:0/18:3)	M+Na	778.536	C42H78O8NPNa	11.691	11.6955	11.676	11.6955	11.67	11.6955	11.661	11.6955	1.38637e+08	1.0836e+08	6.72897e+07	9.7995e+07
135	(34:3e)	M+H	742.575	C42H81O7NP	12.938	13.014	12.989	13.014	13.014	13.014	13.015	13.014	8.1031e+06	1.0244e+07	1.13978e+07	8.9976e+06
136	(34:4)	M+H	754.538	C42H77O8NP	10.957	10.9598	10.949	10.9598	10.945	10.9598	10.95	10.9598	2.82421e+08	2.03617e+08	1.47422e+08	6.78352e+07
137	(16:2e/18:2)	M+H	740.559	C42H79O7NP	14.405	14.435	14.425	14.435	14.4	14.435	14.416	14.435	2.41663e+07	2.63555e+07	6.73877e+06	1.23456e+07
138	(34:5)	M+H	752.522	C42H75O8NP	11.225	11.2223	11.242	11.2223	11.233	11.2223	11.217	11.2223	3.04806e+07	2.76464e+07	1.64473e+07	1.49795e+07
139	(34:5e)	M+Na	760.525	C42H76O7NPNa	10.833	10.8184	10.802	10.8184	10.822	10.8184	10.837	10.8184	2.62089e+07	1.50202e+07	1.00248e+07	1.14069e+07
140	(16:2e/18:3)	M+H	738.543	C42H77O7NP	12.175	12.1562	12.148	12.1562	12.166	12.1562	12.157	12.1562	1.12445e+07	7.78286e+06	6.92394e+06	5.89557e+06
141	(34:6)	M+H	750.507	C42H73O8NP	11.662	11.666	11.669	11.666	11.671	11.666	11.662	11.666	2.87075e+06	3.13803e+06	3.33296e+06	3.13029e+06
142	(34:6e)	M+H	736.528	C42H75O7NP	9.984	9.97823	9.987	9.97823	9.988	9.97823	9.979	9.97823	1.61115e+07	7.23975e+06	2.16128e+07	1.17344e+07
143	(12:1e/22:5)	M+H	736.528	C42H75O7NP	12.574	12.609	12.577	12.609	12.604	12.609	12.549	12.609	5.64546e+06	5.65052e+06	1.23191e+06	1.5926e+06
144	(34:7e)	M+H	734.512	C42H73O7NP	8.802	8.82115	8.799	8.82115	8.819	8.82115	8.818	8.82115	593591	307300	1.27624e+06	424768
145	(12:1e/22:6)	M+H	734.512	C42H73O7NP	12.064	12.0776	12.075	12.0776	12.072	12.0776	12.082	12.0776	2.16564e+06	2.72475e+06	241562	7.37775e+06
146	(35:0)	M+H	776.616	C43H87O8NP	13.792	13.7821	13.782	13.7821	13.777	13.7821	13.809	13.7821	1.53332e+07	1.30816e+07	2.55339e+07	1.25295e+07
147	(22:0/13:0)	M+H	776.616	C43H87O8NP	17.704	17.7168	17.715	17.7168	17.687	17.7168	17.712	17.7168	3.38212e+06	3.85173e+06	1.03876e+06	3.26352e+06
148	(35:0e)	M+H	762.637	C43H89O7NP	16.316	16.3286	16.313	16.3286	16.307	16.3286	16.34	16.3286	3.26317e+07	3.20767e+07	7.19475e+06	1.15319e+07
149	(35:1)	M+H	774.601	C43H85O8NP	14.339	14.3311	14.334	14.3311	14.311	14.3311	14.32	14.3311	8.19414e+08	5.42433e+08	2.92056e+08	4.47491e+08
150	(17:1/18:0)	M+Na	796.583	C43H84O8NPNa	15.127	15.1178	15.11	15.1178	15.117	15.1178	15.09	15.1178	8.79616e+06	1.40128e+07	1.25748e+06	1.06272e+07
151	(17:0/18:1)	M+H	774.601	C43H85O8NP	16.749	16.721	16.738	16.721	16.694	16.721	16.701	16.721	1.84773e+07	2.15831e+07	14341384	2.41251e+07
152	(35:1e)	M+Na	782.603	C43H86O7NPNa	15.283	15.2601	15.35	15.2601	15.274	15.2601	15.295	15.2601	1.70026e+07	1.59651e+07	1.09572e+07	6.17927e+06
153	(35:2)	M+Na	794.567	C43H82O8NPNa	13.233	13.2217	13.239	13.2217	13.202	13.2217	13.198	13.2217	5.86236e+06	3.59801e+06	5.86917e+06	6.56242e+06
154	(17:1/18:1)	M+H	772.585	C43H83O8NP	15.488	15.5012	15.484	15.5012	15.497	15.5012	15.496	15.5012	1.08337e+07	1.78216e+07	2.02575e+07	1.58171e+07
155	(35:2e)	M+H	758.606	C43H85O7NP	14.301	14.2805	14.276	14.2805	14.287	14.2805	14.286	14.2805	3.54271e+08	2.90565e+08	1.53209e+08	9.46972e+07
156	(17:0/18:3)	M+H	770.569	C43H81O8NP	13	12.9819	12.987	12.9819	12.961	12.9819	12.968	12.9819	7.07497e+06	5.56032e+06	7.05882e+06	6.13108e+06
157	(35:3)	M+H	770.569	C43H81O8NP	14.473	14.4695	14.475	14.4695	14.461	14.4695	14.437	14.4695	6.9639e+07	4.38702e+07	7.06658e+07	4.7102e+07
158	(35:3e)	M+H	756.59	C43H83O7NP	13.281	13.2729	13.262	13.2729	13.268	13.2729	13.29	13.2729	1.00353e+08	8.0713e+07	1.90619e+07	1.66674e+07
159	(35:4)	M+H	768.554	C43H79O8NP	11.752	11.6589	11.766	11.6589	11.758	11.6589	11.746	11.6589	1.04857e+08	1.02546e+08	4.24523e+07	4.22072e+07
160	(22:4/13:0)	M+H	768.554	C43H79O8NP	13.897	13.868	13.853	13.868	13.974	13.868	13.987	13.868	5.95107e+06	3.57719e+06	822870	2.35193e+06
161	(35:4e)	M+H	754.575	C43H81O7NP	11.947	11.9567	11.94	11.9567	11.978	11.9567	11.955	11.9567	1.44896e+07	6.45263e+06	1.2025e+06	540982
162	(35:5)	M+Na	788.52	C43H76O8NPNa	11.317	11.3096	11.295	11.3096	11.309	11.3096	11.301	11.3096	4.71277e+08	3.9349e+08	4.10906e+08	3.05851e+08
163	(22:5/13:0)	M+H	766.538	C43H77O8NP	13.282	13.28	13.28	13.28	13.27	13.28	13.284	13.28	7.61627e+08	6.53124e+08	5.44648e+08	8.50967e+08
164	(35:6)	M+H	764.522	C43H75O8NP	12.389	12.3931	12.401	12.3931	12.392	12.3931	12.408	12.3931	8.72776e+08	7.42643e+08	7.58959e+08	9.37645e+08
165	(18:0/18:0)	M+H	790.632	C44H89O8NP	14.489	14.4804	14.518	14.4804	14.476	14.4804	14.492	14.4804	7.24123e+06	8.99866e+06	7.49139e+06	3.42407e+06
166	(36:0)	M+H	790.632	C44H89O8NP	16.366	16.3615	16.349	16.3615	16.356	16.3615	16.36	16.3615	3.83167e+08	3.7376e+08	1.80592e+08	3.48838e+08
167	(36:0e)	M+H	776.653	C44H91O7NP	17.095	17.0982	17.081	17.0982	17.076	17.0982	17.097	17.0982	3.1315e+07	3.39323e+07	1.16285e+07	1.41632e+07
168	(18:0/18:1)	M+H	788.616	C44H87O8NP	13.387	13.3727	13.387	13.3727	13.358	13.3727	13.363	13.3727	8.30761e+06	8.23012e+06	1.22821e+07	3.10401e+06
169	(16:0/20:1)	M+Na	810.598	C44H86O8NPNa	15.261	15.2078	15.235	15.2078	15.164	15.2078	15.207	15.2078	2.08855e+08	1.82204e+08	1.54211e+08	1.81327e+08
170	(36:1)	M+H	788.616	C44H87O8NP	15.192	15.2078	15.209	15.2078	15.187	15.2078	15.209	15.2078	6.16955e+09	6.72993e+09	5.94247e+09	7.47552e+09
171	(36:2)	M+H	786.601	C44H85O8NP	14.823	14.7349	14.677	14.7349	14.726	14.7349	14.722	14.7349	1.277e+07	1.36739e+07	2.55077e+07	1.92821e+07
172	(22:1/14:1)	M+H	786.601	C44H85O8NP	18.527	18.501	18.418	18.501	18.295	18.501	18.503	18.501	134435	751495	296279	437575
173	(36:2e)	M+H	772.621	C44H87O7NP	14.945	14.9455	14.933	14.9455	14.949	14.9455	14.936	14.9455	1.64957e+09	1.4333e+09	1.13126e+09	8.2809e+08
174	(36:3)	M+H	784.585	C44H83O8NP	15.117	15.1135	15.114	15.1135	15.113	15.1135	15.091	15.1135	5.93148e+07	4.54879e+07	4.23977e+07	4.42626e+07
175	(22:1/14:2)	M+H	784.585	C44H83O8NP	17.127	17.169	17.194	17.169	17.197	17.169	17.172	17.169	0	0	77056.2	165666
176	(36:3e)	M+Na	792.588	C44H84O7NPNa	14.723	14.7403	14.766	14.7403	14.763	14.7403	14.722	14.7403	2.96974e+06	8.67227e+06	2.29812e+06	1.01325e+07
177	(18:2/18:2)	M+Na	804.551	C44H80O8NPNa	11.635	11.6475	11.639	11.6475	11.647	11.6475	11.661	11.6475	2.83592e+08	2.88395e+08	2.56415e+08	2.60977e+08
178	(36:4)	M+H	782.569	C44H81O8NP	11.636	11.6475	11.638	11.6475	11.653	11.6475	11.66	11.6475	3.84898e+09	3.59866e+09	3.28071e+09	3.07609e+09
179	(18:4/18:0)	M+H	782.569	C44H81O8NP	14.888	14.8829	14.895	14.8829	14.87	14.8829	14.885	14.8829	1.95453e+07	1.98819e+07	6.72008e+06	1.4444e+07
180	(18:3e/18:1)	M+H	768.59	C44H83O7NP	12.931	12.9362	12.933	12.9362	12.907	12.9362	13.061	12.9362	2.78772e+08	2.04287e+08	1.22036e+07	1.27729e+07
181	(36:4e)	M+Na	790.572	C44H82O7NPNa	13.336	13.3079	13.314	13.3079	13.324	13.3079	13.3	13.3079	2.80448e+07	2.67488e+07	9.08723e+06	1.16518e+07
182	(36:5)	M+H	780.554	C44H79O8NP	11.47	11.465	11.439	11.465	11.452	11.465	11.463	11.465	4.25179e+09	3.56636e+09	3.22965e+09	2.82602e+09
183	(16:2e/20:3)	M+Na	788.556	C44H80O7NPNa	10.913	10.9217	10.948	10.9217	10.889	10.9217	10.901	10.9217	6.27071e+06	1.11381e+07	5.15821e+06	4.27974e+06
184	(36:5e)	M+H	766.575	C44H81O7NP	13.059	13.0504	13.056	13.0504	13.051	13.0504	13.056	13.0504	2.65965e+07	8.93972e+07	2.03313e+06	5.67429e+07
185	(14:1e/22:4)	M+H	766.575	C44H81O7NP	14.55	14.7941	14.579	14.7941	14.802	14.7941	14.566	14.7941	2.16386e+07	2.16244e+07	1.33806e+07	1.9346e+07
186	(18:3/18:3)	M+Na	800.52	C44H76O8NPNa	9.661	9.70219	9.64	9.70219	9.65	9.70219	9.647	9.70219	1.57324e+06	1.00037e+06	324318	224744
187	(36:6)	M+H	778.538	C44H77O8NP	10.55	10.5616	10.55	10.5616	10.559	10.5616	10.543	10.5616	1.42676e+08	1.3126e+08	1.70074e+08	8.36277e+07
188	(14:0/22:6)	M+H	778.538	C44H77O8NP	13.093	13.0979	13.096	13.0979	13.102	13.0979	13.126	13.0979	7.13012e+07	6.30417e+07	4.13028e+07	6.76799e+07
189	(36:6e)	M+H	764.559	C44H79O7NP	11.399	11.389	11.415	11.389	11.384	11.389	11.39	11.389	4.76453e+08	2.67947e+08	2.17333e+08	2.26203e+08
190	(14:1e/22:5)	M+H	764.559	C44H79O7NP	14.358	14.342	14.336	14.342	14.333	14.342	14.347	14.342	2.07858e+07	2.79488e+07	5.12187e+06	2.11765e+07
191	(36:7)	M+H	776.522	C44H75O8NP	10.921	10.938	10.948	10.938	10.922	10.938	10.979	10.938	7.1672e+06	5.07896e+06	3.16306e+06	1.79009e+06
192	(36:7e)	M+H	762.543	C44H77O7NP	10.528	10.5439	10.534	10.5439	10.541	10.5439	10.541	10.5439	1.57361e+07	1.31662e+07	2.74218e+07	2.13395e+07
193	(16:2e/20:5)	M+H	762.543	C44H77O7NP	13.182	13.2	13.194	13.2	13.179	13.2	13.201	13.2	3.84112e+06	7.24003e+06	1.44344e+06	5.68035e+06
194	(36:8)	M+H	774.507	C44H73O8NP	9.986	10.007	9.99	10.007	9.994	10.007	9.979	10.007	1.189e+07	8.46408e+06	6.08804e+06	2.93521e+06
195	(16:0/21:0)	M+Na	826.63	C45H90O8NPNa	16.75	16.7853	16.797	16.7853	16.755	16.7853	16.817	16.7853	2.6342e+07	4.04522e+07	1.01877e+07	2.88743e+07
196	(37:0)	M+H	804.648	C45H91O8NP	16.718	16.7853	16.736	16.7853	16.836	16.7853	16.724	16.7853	3.31247e+07	1.48981e+07	5.67959e+06	1.24659e+07
197	(24:0/13:0)	M+H	804.648	C45H91O8NP	18.488	18.4906	18.493	18.4906	18.489	18.4906	18.485	18.4906	3.62449e+06	3.77419e+06	1.01698e+06	3.40092e+06
198	(37:0e)	M+H	790.668	C45H93O7NP	17.593	17.5893	17.589	17.5893	17.586	17.5893	17.582	17.5893	4.69906e+06	4.8843e+06	864085	884033
199	(37:1)	M+H	802.632	C45H89O8NP	15.825	15.777	15.806	15.777	15.796	15.777	15.824	15.777	7.52281e+08	6.74246e+08	3.06296e+08	6.17215e+08
200	(16:0/21:1)	M+H	802.632	C45H89O8NP	17.736	17.7258	17.72	17.7258	17.712	17.7258	17.713	17.7258	1.63758e+07	2.50768e+07	9.27678e+06	2.37052e+07
201	(37:1e)	M+H	788.653	C45H91O7NP	16.508	16.498	16.486	16.498	16.495	16.498	16.482	16.498	1.6683e+08	1.83668e+08	1.11887e+08	8.54937e+07
202	(37:2)	M+H	800.616	C45H87O8NP	14.788	14.7757	14.803	14.7757	14.79	14.7757	14.786	14.7757	1.03679e+09	8.98389e+08	5.04194e+08	8.31677e+08
203	(19:1/18:1)	M+H	800.616	C45H87O8NP	16.647	16.662	16.654	16.662	16.64	16.662	16.619	16.662	4.76665e+06	9.46006e+06	4.97396e+06	1.06426e+07
204	(37:2e)	M+Na	808.619	C45H88O7NPNa	15.561	15.5733	15.588	15.5733	15.566	15.5733	15.572	15.5733	5.53812e+06	3.90558e+06	2.6196e+06	3.32857e+06
205	(17:0/20:3)	M+H	798.601	C45H85O8NP	12.389	12.3968	12.396	12.3968	12.409	12.3968	12.403	12.3968	7.17666e+06	6.997e+06	1.01483e+07	8.6987e+06
206	(37:3)	M+H	798.601	C45H85O8NP	15.754	15.7595	15.765	15.7595	15.76	15.7595	15.754	15.7595	2.5521e+07	1.98017e+07	1.39096e+07	1.74398e+07
207	(37:3e)	M+H	784.621	C45H87O7NP	14.47	14.4744	14.479	14.4744	14.644	14.4744	14.604	14.4744	6.0778e+07	2.17431e+07	2.6154e+06	4.28202e+06
208	(17:0/20:4)	M+H	796.585	C45H83O8NP	11.399	11.399	11.414	11.399	11.4	11.399	11.412	11.399	4.26167e+07	2.62524e+07	4.201e+07	2.81689e+07
209	(37:4)	M+H	796.585	C45H83O8NP	14.554	14.5515	14.556	14.5515	14.526	14.5515	14.563	14.5515	6.8273e+07	6.01104e+07	7.04378e+07	5.04847e+07
210	(37:4e)	M+H	782.606	C45H85O7NP	15.283	15.283	15.35	15.283	15.274	15.283	15.295	15.283	1.81731e+07	16894469	1.10218e+07	6.55959e+06
211	(37:5)	M+H	794.569	C45H81O8NP	13.178	13.196	13.181	13.196	13.201	13.196	13.198	13.196	4.38149e+06	2.3055e+06	5.61759e+06	6.92924e+06
212	(15:0/22:5)	M+H	794.569	C45H81O8NP	14.203	14.2311	14.211	14.2311	14.214	14.2311	14.221	14.2311	3.33833e+07	2.5609e+07	1.70051e+07	3.58798e+07
213	(37:5e)	M+Na	802.572	C45H82O7NPNa	13.028	13.0307	13.027	13.0307	13.033	13.0307	13.016	13.0307	1.01426e+07	6.55937e+06	4.00659e+06	2.84519e+06
214	(17:1/20:5)	M+Na	814.536	C45H78O8NPNa	10.873	10.8704	10.882	10.8704	10.852	10.8704	10.893	10.8704	827777	1.52479e+06	1.55419e+06	1.2504e+06
215	(37:6)	M+H	792.554	C45H79O8NP	13.792	13.7943	13.8	13.7943	13.779	13.7943	13.79	13.7943	1.25691e+08	1.07931e+08	1.09894e+08	1.93936e+08
216	(38:0)	M+H	818.663	C46H93O8NP	17.437	17.4341	17.436	17.4341	17.423	17.4341	17.44	17.4341	1.24467e+08	1.15655e+08	5.31757e+07	1.20217e+08
217	(38:0e)	M+H	804.684	C46H95O7NP	17.991	18.0156	18.035	18.0156	18.005	18.0156	18.005	18.0156	5.16467e+06	5.50121e+06	2.33384e+06	2.72875e+06
218	(20:0/18:1)	M+Na	838.63	C46H90O8NPNa	16.404	16.3963	16.408	16.3963	16.334	16.3963	16.414	16.3963	6.5774e+07	6.83167e+07	6.7774e+07	6.4676e+07
219	(38:1)	M+H	816.648	C46H91O8NP	16.414	16.3963	16.407	16.3963	16.335	16.3963	16.387	16.3963	9.94169e+08	9.92355e+08	8.67297e+08	9.16231e+08
220	(38:1e)	M+H	802.668	C46H93O7NP	17.1	17.1023	17.083	17.1023	17.077	17.1023	17.079	17.1023	3.35861e+07	3.25444e+07	4.14806e+07	2.84752e+07
221	(38:2)	M+Na	836.614	C46H88O8NPNa	15.384	15.4431	15.425	15.4431	15.407	15.4431	15.414	15.4431	9.56567e+07	9.20733e+07	5.82499e+07	8.83866e+07
222	(24:1/14:1)	M+H	814.632	C46H89O8NP	17.181	17.156	17.194	17.156	17.197	17.156	17.172	17.156	1.06549e+06	2.86192e+06	373594	1.38302e+06
223	(38:2e)	M+H	800.653	C46H91O7NP	16.554	16.5529	16.551	16.5529	16.557	16.5529	16.554	16.5529	1.81273e+07	1.15013e+07	8.68929e+06	8.55992e+06
224	(18:1/20:2)	M+Na	834.598	C46H86O8NPNa	13.444	13.427	13.447	13.427	13.42	13.427	13.432	13.427	1894690048	1567997318	2.39886e+09	2.64657e+09
225	(38:3)	M+H	812.616	C46H87O8NP	16.385	16.354	16.343	16.354	16.356	16.354	16.36	16.354	2.31391e+07	2.42589e+07	1.38576e+07	2.34144e+07
226	(38:3e)	M+H	798.637	C46H89O7NP	14.866	14.8643	14.87	14.8643	14.87	14.8643	14.854	14.8643	1.5272e+07	1.57176e+07	1.52392e+07	1.30382e+07
227	(38:4)	M+H	810.601	C46H85O8NP	15.261	15.2362	15.233	15.2362	15.164	15.2362	15.208	15.2362	2.09854e+08	1.85729e+08	1.83635e+08	1.82652e+08
228	(20:2/18:2)	M+H	810.601	C46H85O8NP	15.802	15.7606	15.748	15.7606	15.789	15.7606	15.737	15.7606	4.64728e+06	2.61691e+06	2.32875e+06	2.9773e+06
229	(38:4e)	M+Na	818.603	C46H86O7NPNa	14.677	14.6765	14.663	14.6765	14.68	14.6765	14.665	14.6765	2.61811e+07	2.20794e+07	1.8378e+07	2.19052e+07
230	(16:0e/22:4)	M+H	796.621	C46H87O7NP	15.957	15.9816	15.957	15.9816	15.981	15.9816	15.978	15.9816	5.10088e+07	4.47138e+07	2.86665e+07	1.7658e+07
231	(16:0/22:5)	M+H	808.585	C46H83O8NP	11.087	11.0766	11.092	11.0766	11.068	11.0766	11.069	11.0766	5.90589e+07	4.29159e+07	3.08468e+07	3.44093e+07
232	(38:5)	M+H	808.585	C46H83O8NP	12.93	12.9155	12.916	12.9155	12.911	12.9155	12.936	12.9155	3.10605e+09	2.69708e+09	2.51273e+09	3019307176
233	(18:1/20:5)	M+Na	828.551	C46H80O8NPNa	11.567	11.5364	11.594	11.5364	11.578	11.5364	11.58	11.5364	6.40504e+07	6.52305e+07	7.36801e+07	6.52098e+07
234	(16:0/22:6)	M+Na	828.551	C46H80O8NPNa	11.987	12.0199	11.963	12.0199	12.035	12.0199	12.001	12.0199	7.92416e+07	9.19166e+07	7.58681e+07	8.68716e+07
235	(38:6)	M+H	806.569	C46H81O8NP	12.008	12.0199	12.013	12.0199	12.035	12.0199	12.001	12.0199	4300097570	3.80434e+09	3.98792e+09	4.2772e+09
236	(38:6e)	M+H	792.59	C46H83O7NP	12.846	12.8548	12.853	12.8548	12.851	12.8548	12.838	12.8548	1.7468e+09	1.43098e+09	7.77667e+08	8.76174e+08
237	(16:1e/22:5)	M+H	792.59	C46H83O7NP	14.723	14.763	14.763	14.763	14.765	14.763	14.722	14.763	3.11547e+06	7.22654e+06	2.16364e+06	1.03148e+07
238	(16:1/22:6)	M+Na	826.536	C46H78O8NPNa	11.158	11.1191	11.126	11.1191	11.125	11.1191	11.115	11.1191	2.17804e+06	3.3025e+06	4.12903e+06	2.938e+06
239	(38:7)	M+H	804.554	C46H79O8NP	11.635	11.65	11.64	11.65	11.646	11.65	11.66	11.65	2.6275e+08	2.93044e+08	2.56872e+08	2.85984e+08
240	(38:7e)	M+H	790.575	C46H81O7NP	11.469	11.4561	11.439	11.4561	11.454	11.4561	11.446	11.4561	1.18705e+08	9.52728e+07	5.03189e+07	5.23611e+07
241	(38:8)	M+H	802.538	C46H77O8NP	11.101	11.106	11.093	11.106	11.082	11.106	11.095	11.106	1.66322e+07	2.16076e+07	8.24263e+06	4.53138e+06
242	(38:8e)	M+H	788.559	C46H79O7NP	11.282	11.0342	11.286	11.0342	11.274	11.0342	11.281	11.0342	1.67467e+07	2.13437e+07	2.57293e+07	1.82649e+07
243	(38:9)	M+H	800.522	C46H75O8NP	8.692	8.67819	8.68	8.67819	8.688	8.67819	8.674	8.67819	5.05304e+06	6.09859e+06	7.08638e+06	908013
244	(16:0/23:0)	M+Na	854.661	C47H94O8NPNa	17.707	17.7803	17.717	17.7803	17.711	17.7803	17.712	17.7803	1.29668e+07	1.98426e+07	6.26208e+06	1.63219e+07
245	(39:0)	M+H	832.679	C47H95O8NP	17.87	17.7803	17.893	17.7803	17.869	17.7803	17.867	17.7803	4.18094e+07	3.59946e+07	1.92592e+07	3.89878e+07
246	(39:1)	M+H	830.663	C47H93O8NP	16.967	16.9716	16.969	16.9716	16.955	16.9716	16.978	16.9716	2.42578e+08	2.40766e+08	1.05018e+08	2.10269e+08
247	(16:0/23:1)	M+H	830.663	C47H93O8NP	18.501	18.5118	18.501	18.5118	18.515	18.5118	18.496	18.5118	1.26797e+07	2.23026e+07	6.83875e+06	2.01952e+07
248	(39:2)	M+H	828.648	C47H91O8NP	16.03	16.0373	16.022	16.0373	16.027	16.0373	16.005	16.0373	3.38054e+08	2.60867e+08	1.34495e+08	2.53219e+08
249	(18:1/21:1)	M+H	828.648	C47H91O8NP	17.666	17.638	17.632	17.638	17.639	17.638	17.631	17.638	2.08378e+07	4.57995e+07	1.21067e+07	3.65646e+07
250	(39:2e)	M+H	814.668	C47H93O7NP	16.758	16.777	16.74	16.777	16.753	16.777	16.756	16.777	2.32003e+06	1.84426e+06	1.41479e+06	1.72545e+06
251	(39:3)	M+H	826.632	C47H89O8NP	14.926	14.6937	14.677	14.6937	14.688	14.6937	14.667	14.6937	5.7162e+07	3.17402e+07	2.67627e+07	2.89074e+07
252	(39:3e)	M+H	812.653	C47H91O7NP	15.737	15.7411	15.738	15.7411	15.805	15.7411	15.803	15.7411	9.12463e+06	7.52713e+06	1.26986e+06	1.33029e+06
253	(39:4)	M+H	824.616	C47H87O8NP	15.822	15.8214	15.806	15.8214	15.794	15.8214	15.824	15.8214	5.39833e+07	5.59962e+07	2.38024e+07	4.8963e+07
254	(39:4e)	M+H	810.637	C47H89O7NP	14.964	14.951	14.964	14.951	15.062	14.951	14.931	14.951	2.01896e+07	7.99999e+06	9.83138e+06	4.18167e+06
255	(17:0/22:5)	M+H	822.601	C47H85O8NP	11.953	11.9473	11.943	11.9473	11.945	11.9473	11.967	11.9473	7.84587e+07	5.76345e+07	7.73295e+07	6.35217e+07
256	(39:5)	M+H	822.601	C47H85O8NP	14.674	14.6576	14.663	14.6576	14.646	14.6576	14.667	14.6576	4.0662e+07	2.71702e+07	2.11301e+07	1.53858e+07
257	(39:5e)	M+H	808.621	C47H87O7NP	14.404	14.4032	14.395	14.4032	14.401	14.4032	14.416	14.4032	1.18293e+08	7.86715e+07	5.82716e+07	7.36994e+07
258	(39:6)	M+H	820.585	C47H83O8NP	12.533	12.5497	12.537	12.5497	12.527	12.5497	12.512	12.5497	1.81364e+08	7.24342e+07	7.86096e+07	9.04741e+07
259	(39:7)	M+H	818.569	C47H81O8NP	11.377	11.3851	11.372	11.3851	11.384	11.3851	11.389	11.3851	3.17405e+07	2.56113e+07	3.15792e+07	2.05973e+07
260	(40:0)	M+H	846.695	C48H97O8NP	18.296	18.2746	18.28	18.2746	18.247	18.2746	18.262	18.2746	3.8271e+07	6.27538e+07	2.4896e+07	5.28895e+07
261	(40:0e)	M+H	832.715	C48H99O7NP	18.79	18.7539	18.761	18.7539	18.729	18.7539	18.748	18.7539	4.88939e+06	3.85212e+06	5.04666e+06	4.94664e+06
262	(40:1)	M+H	844.679	C48H95O8NP	15.991	15.788	15.892	15.788	15.786	15.788	15.786	15.788	64867.1	39666.2	2.10486e+06	99705
263	(20:5/20:5)	M+Na	848.52	C48H76O8NPNa	9.154	9.15721	9.15	9.15721	9.155	9.15721	9.139	9.15721	5.46957e+06	7.47666e+06	7.02408e+06	2.27507e+06
264	(40:1e)	M+H	830.7	C48H97O7NP	17.937	17.9364	17.958	17.9364	17.928	17.9364	18.023	17.9364	3.53224e+06	6.62254e+06	3.43362e+06	2.79787e+06
265	(20:1/20:1)	M+Na	864.645	C48H92O8NPNa	16.382	16.3361	16.316	16.3361	16.358	16.3361	16.356	16.3361	2.05223e+07	3.03305e+07	2.75413e+07	2.07335e+07
266	(18:1/22:1)	M+H	842.663	C48H93O8NP	18.066	18.051	18.033	18.051	18.05	18.051	18.029	18.051	1.11582e+06	2.19611e+06	310865	1.26605e+06
267	(40:2e)	M+H	828.684	C48H95O7NP	17.295	17.2945	17.299	17.2945	17.284	17.2945	17.288	17.2945	3.93737e+06	4.32474e+06	3.46148e+06	3.97991e+06
268	(22:1/18:2)	M+Na	862.63	C48H90O8NPNa	15.355	15.3673	15.37	15.3673	15.381	15.3673	15.336	15.3673	2.85536e+07	2.26234e+07	3.01242e+07	1.77584e+07
269	(40:4)	M+H	838.632	C48H89O8NP	13.867	13.865	13.838	13.865	13.864	13.865	13.898	13.865	2.44234e+07	1.64676e+07	1.18233e+07	1.6329e+07
270	(40:4e)	M+H	824.653	C48H91O7NP	15.956	15.9382	15.917	15.9382	15.924	15.9382	15.916	15.9382	1.02974e+07	9.76327e+06	6.16754e+06	1.0519e+07
271	(40:5)	M+H	836.616	C48H87O8NP	13.881	13.869	13.851	13.869	13.867	13.869	13.882	13.869	1.92478e+08	1.33287e+08	1.03281e+08	1.35741e+08
272	(18:1/22:5)	M+Na	856.583	C48H84O8NPNa	12.589	12.5591	12.597	12.5591	12.565	12.5591	12.605	12.5591	3.25662e+06	2.24523e+06	2.84468e+06	3.53593e+06
273	(18:0/22:6)	M+Na	856.583	C48H84O8NPNa	13.425	13.4342	13.409	13.4342	13.464	13.4342	13.432	13.4342	4.25448e+07	3.33693e+07	6.68607e+07	6.73739e+07
274	(40:6)	M+H	834.601	C48H85O8NP	13.442	13.4342	13.446	13.4342	13.419	13.4342	13.431	13.4342	1.90958e+09	1.57444e+09	2.38655e+09	2591042321
275	(20:2/20:4)	M+H	834.601	C48H85O8NP	15.556	15.556	15.461	15.556	15.535	15.556	15.721	15.556	3.51749e+06	473935	1.83361e+06	1.86616e+06
276	(40:6e)	M+H	820.621	C48H87O7NP	14.251	14.2455	14.239	14.2455	14.241	14.2455	14.225	14.2455	1.10571e+09	7.55985e+08	1.04312e+09	1.01847e+09
277	(18:1/22:6)	M+Na	854.567	C48H82O8NPNa	12.121	12.1062	12.137	12.1062	12.134	12.1062	12.133	12.1062	3.46228e+07	3.47397e+07	4.08874e+07	4.8792e+07
278	(40:7)	M+H	832.585	C48H83O8NP	12.297	12.539	12.293	12.539	12.298	12.539	12.288	12.539	7.36781e+07	4.88711e+07	5.53273e+07	5.35061e+07
279	(40:7e)	M+H	818.606	C48H85O7NP	12.86	12.8683	12.853	12.8683	12.853	12.8683	12.864	12.8683	1.04532e+08	9.81445e+07	8.79517e+07	9.6264e+07
280	(18:2/22:6)	M+Na	852.551	C48H80O8NPNa	10.962	10.9562	10.949	10.9562	10.948	10.9562	10.948	10.9562	8.31314e+07	8.13586e+07	8.88163e+07	7.61124e+07
281	(40:8)	M+H	830.569	C48H81O8NP	10.958	10.9562	10.947	10.9562	10.962	10.9562	10.949	10.9562	1.72631e+09	1.48681e+09	1963960138	1.28801e+09
282	(40:8e)	M+H	816.59	C48H83O7NP	13.337	13.331	13.309	13.331	13.309	13.331	13.329	13.331	1.82004e+07	1.27439e+07	6.09767e+06	6.33744e+06
283	(40:9)	M+H	828.554	C48H79O8NP	9.154	9.159	9.161	9.159	9.159	9.159	9.166	9.159	1.56489e+07	1.43118e+07	1.72952e+07	6.4467e+06
284	(40:9e)	M+H	814.575	C48H81O7NP	13.538	13.5122	13.52	13.5122	13.512	13.5122	13.519	13.5122	2.70089e+06	4.06588e+06	851885	7.40228e+06
285	(41:0)	M+H	860.71	C49H99O8NP	17.296	17.2628	17.232	17.2628	17.288	17.2628	17.259	17.2628	806664	1.0962e+06	3.31066e+06	1.53071e+06
286	(41:1)	M+H	858.695	C49H97O8NP	17.914	17.9054	17.895	17.9054	17.894	17.9054	17.899	17.9054	1.01823e+08	1.53854e+08	4.84793e+07	8.96098e+07
287	(41:2)	M+H	856.679	C49H95O8NP	17.156	17.1561	17.136	17.1561	17.132	17.1561	17.138	17.1561	8.35437e+07	8.18682e+07	3.37172e+07	6.63064e+07
288	(18:1/23:1)	M+H	856.679	C49H95O8NP	18.41	18.4226	18.403	18.4226	18.429	18.4226	18.418	18.4226	1.09183e+07	1.64705e+07	5.78093e+06	1.76585e+07
289	(41:3)	M+H	854.663	C49H93O8NP	16.317	16.3117	16.313	16.3117	16.336	16.3117	16.323	16.3117	2.0703e+07	1.30017e+07	3.23405e+06	6.83737e+06
290	(41:4)	M+H	852.648	C49H91O8NP	15.786	15.7821	15.778	15.7821	15.783	15.7821	15.771	15.7821	2.63195e+07	2.27345e+07	7.91616e+06	1.57938e+07
291	(20:4/21:0)	M+H	852.648	C49H91O8NP	16.966	16.947	16.941	16.947	16.954	16.947	16.942	16.947	1.51855e+07	1.83752e+07	6.05045e+06	1.34885e+07
292	(41:5)	M+H	850.632	C49H89O8NP	14.521	14.5264	14.518	14.5264	14.517	14.5264	14.525	14.5264	1.85021e+07	1.28988e+07	5.5216e+06	1.10274e+07
293	(41:5e)	M+H	836.653	C49H91O7NP	15.751	15.7508	15.734	15.7508	15.702	15.7508	15.682	15.7508	6.33273e+06	4.54789e+06	2.30597e+06	2.73052e+06
294	(41:6)	M+H	848.616	C49H87O8NP	14.096	14.089	14.077	14.089	14.091	14.089	14.081	14.089	6.88478e+07	6.47014e+07	3.34431e+07	5.15279e+07
295	(41:7)	M+H	846.601	C49H85O8NP	12.791	12.7518	12.693	12.7518	12.712	12.7518	12.773	12.7518	9.40733e+06	1.3758e+07	1.14748e+07	8.47231e+06
296	(42:10)	M+H	854.569	C50H81O8NP	10.628	10.6275	10.64	10.6275	10.623	10.6275	10.627	10.6275	2.04027e+08	2.11116e+08	1.19849e+08	9.99727e+07
297	(20:5/22:6)	M+Na	874.536	C50H78O8NPNa	9.709	9.69295	9.686	9.69295	9.689	9.69295	9.698	9.69295	1.36088e+07	1.22126e+07	1.46489e+07	6.25289e+06
298	(42:11)	M+H	852.554	C50H79O8NP	9.687	9.69295	9.684	9.69295	9.68	9.69295	9.699	9.69295	2.55628e+08	2.03378e+08	2.64364e+08	1.18235e+08
299	(42:1e)	M+H	858.731	C50H101O7NP	18.79	18.7599	18.785	18.7599	18.762	18.7599	18.765	18.7599	1.78313e+06	1.71725e+06	2.51473e+06	1.63373e+06
300	(42:2e)	M+H	856.715	C50H99O7NP	18.205	18.1693	18.173	18.1693	18.18	18.1693	18.177	18.1693	4.32157e+06	4.34851e+06	6.59663e+06	4.72056e+06
301	(42:3e)	M+H	854.7	C50H97O7NP	17.218	17.1874	17.197	17.1874	17.176	17.1874	17.148	17.1874	2.47694e+06	3.92825e+06	1.97197e+06	1.57005e+06
302	(42:4e)	M+H	852.684	C50H95O7NP	17.095	17.0932	17.083	17.0932	17.074	17.0932	17.078	17.0932	2.95945e+06	2.5307e+06	1.50006e+06	3.01369e+06
303	(42:5e)	M+H	850.668	C50H93O7NP	16.285	16.2819	16.273	16.2819	16.275	16.2819	16.267	16.2819	1.06302e+07	6.23599e+06	5.12826e+06	7.72914e+06
304	(42:6)	M+H	862.632	C50H89O8NP	15.355	15.3694	15.37	15.3694	15.381	15.3694	15.336	15.3694	2.85536e+07	2.26234e+07	3.01242e+07	1.77584e+07
305	(42:6e)	M+H	848.653	C50H91O7NP	15.514	15.5119	15.508	15.5119	15.503	15.5119	15.522	15.5119	4.51243e+07	3.75192e+07	3.58978e+07	5.38801e+07
306	(42:7)	M+H	860.616	C50H87O8NP	13.396	13.4062	13.394	13.4062	13.403	13.4062	13.394	13.4062	9.51722e+07	7.79426e+07	1.92859e+08	1.07133e+08
307	(42:7e)	M+H	846.637	C50H89O7NP	14.158	14.1908	14.148	14.1908	14.19	14.1908	14.163	14.1908	1.21534e+07	1.09952e+07	1.47759e+07	1.20196e+07
308	(42:8)	M+H	858.601	C50H85O8NP	12.236	12.2441	12.248	12.2441	12.234	12.2441	12.232	12.2441	1.14376e+08	9.64982e+07	1.21848e+08	1.19394e+08
309	(42:8e)	M+H	844.621	C50H87O7NP	14.675	14.6682	14.64	14.6682	14.65	14.6682	14.662	14.6682	1.4976e+07	9.13976e+06	7.68553e+06	7.22965e+06
310	(20:3/22:6)	M+H	856.585	C50H83O8NP	9.934	9.91758	9.91	9.91758	9.917	9.91758	9.927	9.91758	1.18127e+06	1.42286e+06	2.4116e+06	1.91021e+06
311	(42:9)	M+H	856.585	C50H83O8NP	11.583	11.5901	11.593	11.5901	11.608	11.5901	11.603	11.5901	1.52885e+07	1.38249e+07	6.83018e+06	5.27038e+06
312	(42:9e)	M+H	842.606	C50H85O7NP	14.273	14.2641	14.271	14.2641	14.259	14.2641	14.285	14.2641	3.62876e+07	2.1787e+07	3.89502e+07	3.13766e+07
313	(43:0)	M+H	888.742	C51H103O8NP	17.984	18.1274	18.354	18.1274	18.122	18.1274	18.145	18.1274	1.57886e+06	223530	5.75068e+06	4.25967e+06
314	(43:3)	M+H	882.695	C51H97O8NP	18.452	18.4537	18.464	18.4537	18.432	18.4537	18.467	18.4537	4.89308e+06	6.20656e+06	2.84907e+06	6.20295e+06
315	(43:4)	M+H	880.679	C51H95O8NP	16.919	16.9292	16.924	16.9292	16.92	16.9292	16.916	16.9292	8.12567e+06	9.707e+06	3.0049e+06	5.4407e+06
316	(43:5)	M+H	878.663	C51H93O8NP	16.142	16.1373	16.14	16.1373	16.134	16.1373	16.127	16.1373	2.20913e+07	1.30721e+07	1.1265e+07	1.32019e+07
317	(43:6)	M+H	876.648	C51H91O8NP	15.377	15.3782	15.374	15.3782	15.36	15.3782	15.376	15.3782	3.04728e+07	2.11039e+07	2.17991e+07	2.92837e+07
318	(28:0/16:0)	M+H	902.757	C52H105O8NP	19.53	19.5141	19.523	19.5141	19.514	19.5141	19.527	19.5141	4.52382e+06	2.34779e+06	757245	1.77364e+06
319	(44:0e)	M+H	888.778	C52H107O7NP	17.806	17.803	17.556	17.803	17.553	17.803	17.819	17.803	1.71724e+06	0	0	515996
320	(44:10)	M+H	882.601	C52H85O8NP	11.651	11.674	11.694	11.674	11.702	11.674	11.678	11.674	2.46482e+06	1.52913e+06	1.3289e+06	2.1715e+06
321	(44:11)	M+H	880.585	C52H83O8NP	10.693	10.6957	10.682	10.6957	10.678	10.6957	10.699	10.6957	1.45594e+07	1.2264e+07	1.21686e+07	1.03611e+07
322	(44:12)	M+H	878.569	C52H81O8NP	10.246	10.237	10.23	10.237	10.227	10.237	10.22	10.237	1.06442e+08	1.13635e+08	1.05441e+08	7.27649e+07
323	(44:4)	M+H	894.695	C52H97O8NP	17.145	17.14	17.107	17.14	17.131	17.14	17.116	17.14	2.51577e+06	1.21892e+06	465018	627516
324	(44:4e)	M+H	880.715	C52H99O7NP	17.99	17.9909	17.989	17.9909	18.005	17.9909	17.993	17.9909	5.10812e+06	5.00665e+06	3.74767e+06	3.53455e+06
325	(44:5)	M+H	892.679	C52H95O8NP	16.292	16.2723	16.271	16.2723	16.283	16.2723	16.269	16.2723	2.14868e+07	5.77193e+07	1.38456e+07	1.98695e+07
326	(44:5e)	M+H	878.7	C52H97O7NP	17.365	17.3653	17.361	17.3653	17.361	17.3653	17.368	17.3653	1.61726e+07	9.13281e+06	1.30516e+07	1.25086e+07
327	(44:6)	M+H	890.663	C52H93O8NP	15.983	15.9781	15.98	15.9781	15.979	15.9781	15.964	15.9781	3.22985e+07	1.77792e+07	1.99713e+07	3.00145e+07
328	(44:6e)	M+H	876.684	C52H95O7NP	16.686	16.6911	16.677	16.6911	16.672	16.6911	16.675	16.6911	3.78138e+06	2.46061e+06	2.28101e+06	3.70609e+06
329	(44:7)	M+H	888.648	C52H91O8NP	14.328	14.3184	14.333	14.3184	14.31	14.3184	14.33	14.3184	3.53287e+06	9.98602e+06	4.88582e+06	4.64584e+06
330	(45:1)	M+H	914.757	C53H105O8NP	19.244	19.26	19.251	19.26	19.252	19.26	19.238	19.26	1.30771e+06	4.23936e+06	1.27059e+06	1.55099e+06
331	(27:0/18:1)	M+H	914.757	C53H105O8NP	19.53	19.516	19.384	19.516	19.536	19.516	19.549	19.516	5.40676e+06	316914	133840	1.93731e+06
332	(45:3)	M+H	910.726	C53H101O8NP	17.894	17.9026	17.909	17.9026	17.855	17.9026	17.917	17.9026	4.33693e+06	7.64129e+06	2.00496e+06	2.81057e+06
333	(45:6)	M+H	904.679	C53H95O8NP	16.56	16.5549	16.545	16.5549	16.546	16.5549	16.554	16.5549	1.1773e+07	4.88475e+06	1.00274e+07	1.10144e+07
334	(46:0)	M+H	930.789	C54H109O8NP	19.99	19.9564	19.991	19.9564	20.005	19.9564	20.038	19.9564	2.37858e+07	3.61402e+06	549236	3.70256e+06
335	(46:1)	M+H	928.773	C54H107O8NP	19.518	19.4864	19.416	19.4864	19.419	19.4864	19.525	19.4864	6.88786e+06	8.9707e+06	3.61603e+06	5.64759e+06
336	(46:3)	M+H	924.742	C54H103O8NP	18.246	18.2395	18.234	18.2395	18.247	18.2395	18.244	18.2395	6.20159e+07	1.00174e+08	4.85753e+07	6.42854e+07
337	(46:4)	M+H	922.726	C54H101O8NP	17.57	17.5754	17.575	17.5754	17.576	17.5754	17.587	17.5754	4.27769e+07	8.2226e+07	2.45265e+07	2.85088e+07
338	(46:5)	M+H	920.71	C54H99O8NP	17.709	17.69	17.702	17.69	17.7	17.69	17.724	17.69	2.45447e+06	5.59838e+06	1.87591e+06	2.03662e+06
339	(46:6)	M+H	918.695	C54H97O8NP	17.083	17.0936	17.082	17.0936	17.079	17.0936	17.091	17.0936	5.15159e+06	4.04241e+06	4.13021e+06	6.29542e+06
340	(46:7)	M+H	916.679	C54H95O8NP	15.882	15.8749	15.854	15.8749	15.868	15.8749	15.874	15.8749	8.30383e+06	1.01577e+07	1.16877e+07	1.10676e+07
341	(47:1)	M+H	942.789	C55H109O8NP	19.613	19.682	19.661	19.682	19.688	19.682	19.862	19.682	305612	1.91171e+06	280663	230326
342	(47:5)	M+H	934.726	C55H101O8NP	16.68	16.5361	16.287	16.5361	16.544	16.5361	16.539	16.5361	78664.7	0	2.28994e+06	580458
343	(48:0)	M+H	958.82	C56H113O8NP	20.385	20.429	20.411	20.429	20.396	20.429	20.349	20.429	9.78905e+06	3.58235e+06	1.74688e+06	5.71158e+06
344	(48:3)	M+H	952.773	C56H107O8NP	18.828	18.8314	18.834	18.8314	18.833	18.8314	18.825	18.8314	3.2611e+06	5.18153e+06	2.33726e+06	3.25224e+06
345	(48:4)	M+H	950.757	C56H105O8NP	18.327	18.3265	18.331	18.3265	18.321	18.3265	18.313	18.3265	4.27769e+06	3.40582e+06	1.22506e+06	1.66199e+06
346	(48:6)	M+H	946.726	C56H101O8NP	17.421	17.4554	17.415	17.4554	17.432	17.4554	17.398	17.4554	189979	446027	84786.4	114071
347	(48:7)	M+H	944.71	C56H99O8NP	16.657	16.664	16.67	16.664	16.662	16.664	16.672	16.664	1.37189e+06	4.27808e+06	1.72562e+06	1.26724e+06
348	(50:1)	M+H	984.835	C58H115O8NP	20.363	20.344	20.346	20.344	20.334	20.344	20.347	20.344	697285	4.41909e+06	1.19994e+06	2.1217e+06
349	(50:2)	M+H	982.82	C58H113O8NP	19.834	19.8442	19.839	19.8442	19.862	19.8442	19.84	19.8442	445989	5.87025e+06	2.03958e+06	2.38077e+06
350	(50:3)	M+H	980.804	C58H111O8NP	19.424	19.3666	19.384	19.3666	19.36	19.3666	19.36	19.3666	372469	3.32521e+06	1.19552e+06	1.53965e+06
351	(12:0/14:0)	M+HCOO	694.466	C35H69O10NP	9.31563	9.301	9.31563	9.334	9.31563	9.314	9.31563	9.327	372345	621196	1.69122e+06	673021
352	(26:0e)	M+HCOO	680.487	C35H71O9NP	10.15	10.139	10.15	10.151	10.15	10.142	10.15	10.149	244105	234346	772724	337377
353	(16:0/12:0)	M+HCOO	722.498	C37H73O10NP	10.819	10.829	10.819	10.802	10.819	10.807	10.819	10.814	7.95889e+06	8.09742e+06	1.09309e+07	9.09473e+06
354	(16:1/12:0)	M+HCOO	720.482	C37H71O10NP	9.45146	9.506	9.45146	9.443	9.45146	9.45	9.45146	9.456	189956	235292	504457	344687
355	(15:0/14:0)	M+HCOO	736.513	C38H75O10NP	11.448	11.464	11.448	11.426	11.448	11.456	11.448	11.456	196188	653823	270523	258997
356	(16:0/14:0)	M+HCOO	750.529	C39H77O10NP	12.3188	12.348	12.3188	12.343	12.3188	12.322	12.3188	12.326	6.41221e+07	5.56445e+07	6.27544e+07	5.08815e+07
357	(16:1/14:0)	M+HCOO	748.513	C39H75O10NP	10.9495	10.959	10.9495	10.995	10.9495	10.967	10.9495	10.943	1.15609e+07	1.10324e+07	1.06771e+07	7.59802e+06
358	(16:0/14:1)	M+HCOO	748.513	C39H75O10NP	11.3141	11.178	11.3141	11.213	11.3141	11.4	11.3141	11.357	1.27795e+06	2.06137e+06	2.17062e+06	1.25153e+06
359	(30:1)	M+CH3COO	762.529	C40H77O10NP	12.398	12.418	12.398	12.387	12.398	12.374	12.398	12.392	3.19427e+08	3.40896e+08	4.13394e+08	3.93988e+08
360	(14:0e/16:1)	M+HCOO	734.534	C39H77O9NP	11.8359	11.854	11.8359	11.837	11.8359	11.845	11.8359	11.845	4.70837e+06	2.5916e+06	3.24702e+06	2.19193e+06
361	(14:1e/16:0)	M+HCOO	734.534	C39H77O9NP	12.3682	12.35	12.3682	12.368	12.3682	12.362	12.3682	12.375	4.85023e+06	2.67869e+06	8.90338e+06	6.02638e+06
362	(12:0/18:2)	M+HCOO	746.498	C39H73O10NP	9.75717	9.751	9.75717	9.76	9.75717	9.772	9.75717	9.778	1.87226e+06	2.06607e+06	3.0813e+06	2.27361e+06
363	(15:0/16:0)	M+HCOO	764.545	C40H79O10NP	13.0449	13.091	13.0449	13.087	13.0449	13.098	13.0449	13.084	4.33166e+07	4.02902e+07	4.36498e+07	3.16887e+07
364	(15:0/16:1)	M+CH3COO	776.545	C41H79O101H79O10NP	12.454	12.468	12.454	12.46	12.454	12.472	12.454	12.446	2.78809e+08	2.91759e+08	2.85377e+08	2.44773e+08
365	(18:2/13:0)	M+HCOO	760.513	C40H75O10NP	10.7802	10.738	10.7802	10.744	10.7802	10.76	10.7802	10.74	1.25709e+08	1.07127e+08	1.00644e+08	7.58209e+07
366	(15:0/17:0)	M+HCOO	778.56	C41H81O10NP	12.1681	12.166	12.1681	12.18	12.1681	12.146	12.1681	12.178	822891	1.09577e+06	1.43484e+06	852172
367	(16:0/16:0)	M+HCOO	778.56	C41H81O10NP	13.7779	13.786	13.7779	13.81	13.7779	13.803	13.7779	13.796	6.03015e+08	5.40018e+08	7.2801e+08	7.06541e+08
368	(16:0e/16:0)	M+HCOO	764.581	C41H83O9NP	14.6379	14.656	14.6379	14.656	14.6379	14.66	14.6379	14.643	9.35926e+07	9.28038e+07	7.45727e+07	4.60796e+07
369	(16:0/16:1)	M+HCOO	776.545	C41H79O10NP	12.4555	12.468	12.4555	12.46	12.4555	12.472	12.4555	12.446	2.78809e+08	2.91759e+08	2.85377e+08	2.44773e+08
370	(16:1e/16:0)	M+HCOO	762.565	C41H81O9NP	13.3079	13.331	13.3079	13.325	13.3079	13.316	13.3079	13.346	7.40401e+07	6.63006e+07	4.4242e+07	3.55332e+07
371	(16:1/16:1)	M+HCOO	774.529	C41H77O10NP	11.242	11.245	11.242	11.252	11.242	11.237	11.242	11.254	9.62532e+07	7.20029e+07	6.25575e+07	5.67659e+07
372	(18:0/14:2)	M+CH3COO	788.545	C42H79O10NP	11.8085	11.779	11.8085	11.77	11.8085	11.791	11.8085	11.788	3.98738e+07	4.78802e+06	4.30025e+07	2.12271e+07
373	(14:0e/18:2)	M+HCOO	760.55	C41H79O9NP	12.1285	12.139	12.1285	12.136	12.1285	12.125	12.1285	12.122	4.26431e+07	2.68339e+07	2.96749e+07	1.97645e+07
374	(14:0/18:3)	M+HCOO	772.513	C41H75O10NP	10.2178	10.221	10.2178	10.211	10.2178	10.219	10.2178	10.215	1.34357e+07	7.3169e+06	4.06879e+06	3.54388e+06
375	(32:3)	M+CH3COO	786.529	C42H77O10NP	10.7794	10.753	10.7794	10.765	10.7794	10.779	10.7794	10.786	1.49873e+08	1.41724e+08	1.60602e+08	9.94892e+07
376	(14:1e/18:2)	M+CH3COO	772.55	C42H79O9NP	11.8576	11.828	11.8576	11.832	11.8576	11.823	11.8576	11.807	4.36485e+06	3.03669e+06	2.59561e+06	1.19521e+06
377	(12:0/20:4)	M+HCOO	770.498	C41H73O10NP	9.48517	9.506	9.48517	9.52	9.48517	9.489	9.48517	9.525	918021	873019	991974	503223
378	(16:0/17:0)	M+HCOO	792.576	C42H83O10NP	14.5215	14.491	14.5215	14.484	14.5215	14.501	14.5215	14.478	1.05252e+08	9.08461e+07	7.90141e+07	8.16504e+07
379	(18:0e/15:0)	M+HCOO	778.597	C42H85O9NP	15.3057	15.326	15.3057	15.337	15.3057	15.327	15.3057	15.326	1.0049e+07	8.6443e+06	5.2281e+06	2.43847e+06
380	(16:1/17:0)	M+HCOO	790.56	C42H81O10NP	11.5509	11.606	11.5509	11.598	11.5509	11.553	11.5509	11.576	720865	783692	1.3417e+06	661967
381	(15:0/18:1)	M+HCOO	790.56	C42H81O10NP	13.1092	13.178	13.1092	13.172	13.1092	13.184	13.1092	13.188	1.32179e+08	1.35752e+08	1.35586e+08	1.17705e+08
382	(15:0/18:2)	M+HCOO	788.545	C42H79O10NP	14.3041	14.325	14.3041	14.295	14.3041	14.286	14.3041	14.319	2.2932e+07	1.79841e+07	9.78206e+06	1.09227e+07
383	(15:0/18:3)	M+HCOO	786.529	C42H77O10NP	11.3168	11.328	11.3168	11.314	11.3168	11.305	11.3168	11.324	398864	105568	55141.5	77798.7
384	(17:0/17:0)	M+HCOO	806.592	C43H85O10NP	14.5854	14.608	14.5854	14.587	14.5854	14.581	14.5854	14.615	7.33862e+06	4.24552e+06	3.23041e+06	2.23285e+06
385	(18:0/16:0)	M+HCOO	806.592	C43H85O10NP	15.1203	15.139	15.1203	15.145	15.1203	15.15	15.1203	15.137	2.83026e+08	2.50207e+08	2.6201e+08	3.25711e+08
386	(18:0e/16:0)	M+HCOO	792.612	C43H87O9NP	15.9282	15.972	15.9282	15.938	15.9282	15.944	15.9282	15.949	4.79036e+07	5.22581e+07	3.3961e+07	3.49684e+07
387	(16:0/18:1)	M+HCOO	804.576	C43H83O10NP	13.8769	13.87	13.8769	13.881	13.8769	13.884	13.8769	13.885	1860581432	1.92407e+09	2.09457e+09	2.25937e+09
388	(18:0/16:1)	M+HCOO	804.576	C43H83O10NP	14.2816	14.234	14.2816	14.262	14.2816	14.272	14.2816	14.207	1.58618e+07	1.46437e+07	1.06788e+07	9.32578e+06
389	(16:0e/18:1)	M+CH3COO	804.612	C44H87O9NP	15.2584	15.253	15.2584	15.252	15.2584	15.26	15.2584	15.249	8.02895e+07	7.81324e+07	6.54262e+07	4.57301e+07
390	(18:1e/16:0)	M+HCOO	790.597	C43H85O9NP	15.7543	15.782	15.7543	15.784	15.7543	15.725	15.7543	15.777	3.22086e+06	1.18516e+07	512578	9.03523e+06
391	(16:0/18:2)	M+HCOO	802.56	C43H81O10NP	12.7226	12.744	12.7226	12.732	12.7226	12.738	12.7226	12.74	1912736785	1.73375e+09	1.53125e+09	1.57065e+09
392	(16:0e/18:2)	M+HCOO	788.581	C43H83O9NP	13.5883	13.603	13.5883	13.597	13.5883	13.616	13.5883	13.619	4.28408e+08	3.8497e+08	2.75683e+08	1.67578e+08
393	(16:1e/18:1)	M+HCOO	788.581	C43H83O9NP	14.0094	13.967	14.0094	13.982	14.0094	13.97	14.0094	13.996	1.45057e+07	1.91869e+07	1.14381e+07	1.13778e+07
394	(16:1e/18:2)	M+HCOO	786.565	C43H81O9NP	12.1856	12.193	12.1856	12.209	12.1856	12.206	12.1856	12.191	1.9801e+07	1.58862e+07	1.11681e+07	6.28244e+06
395	(16:1/18:3)	M+HCOO	798.529	C43H77O10NP	10.342	10.352	10.342	10.356	10.342	10.354	10.342	10.349	2.18696e+07	1.4182e+07	8.38331e+06	6.23364e+06
396	(18:4/16:0)	M+HCOO	798.529	C43H77O10NP	10.9598	10.988	10.9598	10.996	10.9598	10.965	10.9598	10.983	3.3064e+07	2.71807e+07	2.27707e+07	1.07132e+07
397	(16:1e/18:3)	M+HCOO	784.55	C43H79O9NP	11.8366	11.835	11.8366	11.84	11.8366	11.836	11.8366	11.844	1.58842e+07	1.47053e+07	7.90136e+06	9.28644e+06
398	(18:4/16:1)	M+HCOO	796.513	C43H75O10NP	9.60989	9.612	9.60989	9.618	9.60989	9.632	9.60989	9.596	953726	790202	1.47177e+06	249649
399	(14:0/20:5)	M+HCOO	796.513	C43H75O10NP	9.99868	9.982	9.99868	10	9.99868	9.988	9.99868	10.017	2.42564e+07	1.97457e+07	1.77188e+07	8.42742e+06
400	(14:0e/20:5)	M+HCOO	782.534	C43H77O9NP	10.8184	10.831	10.8184	10.819	10.8184	10.824	10.8184	10.828	5.70507e+07	3.33687e+07	3.056e+07	2.56874e+07
401	(12:0/22:6)	M+HCOO	794.498	C43H73O10NP	9.12398	9.153	9.12398	9.119	9.12398	9.143	9.12398	9.131	372442	494768	815714	453089
402	(20:5/14:1)	M+CH3COO	808.513	C44H75O10NP	10.0095	9.982	10.0095	10.001	10.0095	10.002	10.0095	10.018	7.43874e+07	7.39966e+07	6.75695e+07	5.85781e+07
403	(14:1e/20:5)	M+CH3COO	794.534	C44H77O9NP	10.5098	10.521	10.5098	10.503	10.5098	10.512	10.5098	10.516	2.14374e+06	1.30218e+06	2.22707e+06	1.08069e+06
404	(16:0/19:0)	M+HCOO	820.607	C44H87O10NP	15.5449	15.558	15.5449	15.558	15.5449	15.57	15.5449	15.549	3.24115e+07	2.28996e+07	1.03027e+07	1.8917e+07
405	(18:0/17:0)	M+CH3COO	834.623	C45H89O10NP	16.1791	16.182	16.1791	16.156	16.1791	16.174	16.1791	16.287	3.12619e+06	2.59369e+06	845690	1.95425e+06
406	(17:0/18:2)	M+HCOO	816.576	C44H83O10NP	13.2217	13.219	13.2217	13.216	13.2217	13.248	13.2217	13.241	1.16031e+08	9.577e+07	6.80364e+07	7.00378e+07
407	(17:1/18:2)	M+HCOO	814.56	C44H81O10NP	12.2222	12.235	12.2222	12.235	12.2222	12.26	12.2222	12.245	4.98311e+07	3.3199e+07	2.5085e+07	9.43614e+06
408	(17:1/18:3)	M+HCOO	812.545	C44H79O10NP	11.052	11.062	11.052	11.059	11.052	11.053	11.052	11.052	5.35495e+06	3.45625e+06	2.37748e+06	1.30676e+06
409	(15:0/20:4)	M+HCOO	812.545	C44H79O10NP	11.6589	11.638	11.6589	11.624	11.6589	11.644	11.6589	11.642	1.70722e+07	1.78919e+07	8.23257e+06	6.86878e+06
410	(15:0/20:5)	M+HCOO	810.529	C44H77O10NP	10.5216	10.54	10.5216	10.509	10.5216	10.518	10.5216	10.516	9.99576e+06	6.90095e+06	4.36895e+06	3.90619e+06
411	(20:0/16:0)	M+HCOO	834.623	C45H89O10NP	16.3615	16.388	16.3615	16.377	16.3615	16.408	16.3615	16.381	4.2584e+07	4.45596e+07	2.94064e+07	4.67436e+07
412	(17:0/19:0)	M+CH3COO	848.639	C46H91O10NP	16.7544	16.752	16.7544	16.776	16.7544	16.62	16.7544	16.74	2.08883e+06	1.08974e+06	281228	448207
413	(20:0e/16:0)	M+HCOO	820.644	C45H91O9NP	17.0982	17.113	17.0982	17.12	17.0982	17.115	17.0982	17.117	4.94013e+06	6.56752e+06	2.87359e+06	3.53302e+06
414	(20:1e/16:0)	M+HCOO	818.628	C45H89O9NP	15.4549	15.324	15.4549	15.471	15.4549	15.473	15.4549	15.461	2.80685e+06	2.0604e+06	1.40615e+06	4.74412e+06
415	(16:0e/20:1)	M+HCOO	818.628	C45H89O9NP	15.9809	16	15.9809	15.979	15.9809	16.011	15.9809	15.995	7.81381e+07	8.86505e+07	6.35625e+07	5.90222e+07
416	(36:1e)	M+CH3COO	832.644	C46H91O9NP	16.7333	16.745	16.7333	16.664	16.7333	16.655	16.7333	16.649	4.40962e+06	1.68941e+06	780774	396355
417	(18:1/18:1)	M+HCOO	830.592	C45H85O10NP	14.123	14.14	14.123	14.138	14.123	14.136	14.123	14.15	1.5731e+09	1.44065e+09	1.21657e+09	1.58043e+09
418	(16:0/20:2)	M+HCOO	830.592	C45H85O10NP	16.6587	16.745	16.6587	16.822	16.6587	16.703	16.6587	16.816	709584	331084	424905	823518
419	(18:0e/18:2)	M+HCOO	816.612	C45H87O9NP	14.9455	14.951	14.9455	14.968	14.9455	14.966	14.9455	14.961	1.44808e+08	1.26286e+08	1.34905e+08	8.75635e+07
420	(18:1e/18:1)	M+HCOO	816.612	C45H87O9NP	15.8051	15.82	15.8051	15.801	15.8051	15.798	15.8051	15.797	1.53994e+06	9.416e+06	279690	1.27969e+07
421	(18:1/18:2)	M+HCOO	828.576	C45H83O10NP	12.8116	12.801	12.8116	12.806	12.8116	12.808	12.8116	12.806	7.20996e+08	7.63103e+08	7.93838e+08	7.05201e+08
422	(18:0/18:3)	M+HCOO	828.576	C45H83O10NP	13.1347	13.143	13.1347	13.13	13.1347	13.162	13.1347	13.127	2.86782e+08	2.22862e+08	1.15427e+08	1.59424e+08
423	(16:0e/20:3)	M+HCOO	814.597	C45H85O9NP	13.5913	13.579	13.5913	13.594	13.5913	13.591	13.5913	13.619	1.10088e+07	1.14762e+07	1.31999e+07	8.88146e+06
424	(18:0e/18:3)	M+HCOO	814.597	C45H85O9NP	13.9861	13.983	13.9861	13.984	13.9861	13.998	13.9861	13.997	2.53683e+07	1.60261e+07	8.12048e+06	4.75039e+06
425	(18:1e/18:2)	M+HCOO	814.597	C45H85O9NP	14.7403	14.736	14.7403	14.751	14.7403	14.756	14.7403	14.724	3.54925e+06	1.68871e+07	1.21451e+06	1.88004e+07
426	(16:0/20:4)	M+HCOO	826.56	C45H81O10NP	12.461	12.469	12.461	12.475	12.461	12.472	12.461	12.465	2.41788e+08	2.40128e+08	1.41849e+08	1.63337e+08
427	(16:0e/20:4)	M+HCOO	812.581	C45H83O9NP	13.3079	13.332	13.3079	13.325	13.3079	13.315	13.3079	13.331	1.33979e+08	1.46562e+08	4.15018e+07	4.81188e+07
428	(18:3/18:2)	M+HCOO	824.545	C45H79O10NP	10.6187	10.619	10.6187	10.626	10.6187	10.617	10.6187	10.628	1.19268e+08	9.26798e+07	6.1877e+07	4.51327e+07
429	(18:4/18:1)	M+HCOO	824.545	C45H79O10NP	11.1063	11.096	11.1063	11.113	11.1063	11.12	11.1063	11.132	2.53135e+07	2.93983e+07	1.59718e+07	1.00771e+07
430	(16:0/20:5)	M+HCOO	824.545	C45H79O10NP	11.465	11.48	11.465	11.473	11.465	11.471	11.465	11.465	5.56229e+08	5.48512e+08	5.78996e+08	4.58164e+08
431	(18:3e/18:2)	M+HCOO	810.565	C45H81O9NP	11.8921	11.878	11.8921	11.906	11.8921	11.892	11.8921	11.879	9.44454e+06	1.15549e+07	2.55006e+06	4.05301e+06
432	(16:0e/20:5)	M+HCOO	810.565	C45H81O9NP	12.2952	12.323	12.2952	12.31	12.2952	12.319	12.2952	12.305	4.16378e+08	3.32757e+08	1.80576e+08	1.35715e+08
433	(16:1e/20:4)	M+HCOO	810.565	C45H81O9NP	13.0504	12.961	13.0504	13.075	13.0504	12.961	13.0504	13.045	2.84578e+07	1.09664e+07	1.90945e+07	9.48444e+06
434	(16:1/20:5)	M+HCOO	822.529	C45H77O10NP	10.1314	10.136	10.1314	10.133	10.1314	10.144	10.1314	10.141	4.76835e+07	5.7828e+07	5.63126e+07	2.16012e+07
435	(16:1e/20:5)	M+HCOO	808.55	C45H79O9NP	10.8997	10.895	10.8997	10.911	10.8997	10.901	10.8997	10.916	3.35511e+07	2.49924e+07	1.48708e+07	1.01393e+07
436	(14:0e/22:6)	M+HCOO	808.55	C45H79O9NP	11.389	11.375	11.389	11.386	11.389	11.392	11.389	11.385	4.45899e+07	3.35086e+07	2.64894e+07	2.87864e+07
437	(18:4/18:3)	M+HCOO	820.513	C45H75O10NP	8.90763	8.91	8.90763	8.919	8.90763	8.913	8.90763	8.903	554018	437070	434308	30981
438	(14:1e/22:6)	M+CH3COO	820.55	C46H79O9NP	11.0686	11.066	11.0686	11.032	11.0686	11.082	11.0686	11.087	1.40261e+06	1.06292e+06	1.76876e+06	1.00538e+06
439	(22:6/14:3)	M+CH3COO	830.498	C46H73O10NP	12.4018	12.392	12.4018	12.4	12.4018	12.418	12.4018	12.391	1.40509e+07	1.24467e+07	1.73594e+07	1.82078e+07
440	(19:0/18:1)	M+HCOO	846.623	C46H89O10NP	15.777	15.833	15.777	15.843	15.777	15.845	15.777	15.833	8.51208e+07	7.35922e+07	5.07273e+07	8.44666e+07
441	(19:0/18:2)	M+HCOO	844.607	C46H87O10NP	14.7757	14.802	14.7757	14.798	14.7757	14.795	14.7757	14.799	1.24443e+08	9.16366e+07	6.61012e+07	9.21947e+07
442	(19:1/18:2)	M+HCOO	842.592	C46H85O10NP	13.4319	13.442	13.4319	13.447	13.4319	13.474	13.4319	13.426	3.32685e+07	1.78021e+07	1.64717e+07	1.48138e+07
443	(19:0/18:3)	M+HCOO	842.592	C46H85O10NP	13.7695	13.803	13.7695	13.763	13.7695	13.714	13.7695	13.655	3.09997e+07	1.94147e+07	7.36564e+06	1.18764e+07
444	(17:0/20:5)	M+HCOO	838.56	C46H81O10NP	12.2043	12.194	12.2043	12.195	12.2043	12.206	12.2043	12.197	8.89954e+07	8.09271e+07	5.60863e+07	4.65465e+07
445	(15:0/22:6)	M+CH3COO	850.56	C47H81O10NP	11.0038	10.987	11.0038	10.998	11.0038	11.009	11.0038	10.981	7.90772e+07	8.98526e+07	6.37695e+07	5.45747e+07
446	(16:0/22:0)	M+HCOO	862.654	C47H93O10NP	17.4341	17.447	17.4341	17.465	17.4341	17.449	17.4341	17.444	1.63971e+07	1.60562e+07	1.0043e+07	1.83281e+07
447	(20:0/18:2)	M+HCOO	858.623	C47H89O10NP	15.1849	15.162	15.1849	15.164	15.1849	15.181	15.1849	15.161	4.26454e+07	4.87981e+07	7.03212e+07	4.70368e+07
448	(20:1/18:1)	M+HCOO	858.623	C47H89O10NP	15.4431	15.427	15.4431	15.451	15.4431	15.306	15.4431	15.426	1.85709e+08	1.84612e+08	1.66436e+08	1.88159e+08
449	(18:0e/20:2)	M+HCOO	844.644	C47H91O9NP	16.1214	16.096	16.1214	16.106	16.1214	16.208	16.1214	16.199	8.22852e+06	7.902e+06	6.44804e+06	5.60638e+06
450	(18:0/20:3)	M+HCOO	856.607	C47H87O10NP	14.4393	14.462	14.4393	14.481	14.4393	14.341	14.4393	14.474	7.58442e+07	5.03389e+07	3.34758e+07	3.11158e+07
451	(20:1e/18:2)	M+HCOO	842.628	C47H89O9NP	14.8643	14.871	14.8643	14.863	14.8643	14.899	14.8643	14.867	1.06089e+06	979738	1.86878e+06	1.20225e+06
452	(18:0e/20:3)	M+HCOO	842.628	C47H89O9NP	15.1364	15.14	15.1364	15.164	15.1364	15.232	15.1364	15.209	2.04311e+07	1.36563e+07	7.55754e+06	5.13654e+06
453	(18:1/20:3)	M+HCOO	854.592	C47H85O10NP	12.9484	12.962	12.9484	12.94	12.9484	12.943	12.9484	12.959	1.66101e+08	1.61623e+08	1.53024e+08	1.32396e+08
454	(18:0/20:4)	M+HCOO	854.592	C47H85O10NP	13.8738	13.886	13.8738	13.885	13.8738	13.883	13.8738	13.899	1.43163e+08	1.34368e+08	8.53406e+07	1.16061e+08
455	(18:0e/20:4)	M+HCOO	840.612	C47H87O9NP	14.6765	14.694	14.6765	14.685	14.6765	14.687	14.6765	14.695	5.07489e+07	4.5483e+07	3.59495e+07	3.83875e+07
456	(20:3/18:2)	M+HCOO	852.576	C47H83O10NP	11.6329	11.524	11.6329	11.534	11.6329	11.558	11.6329	11.529	2.95064e+07	3.61597e+07	4.57421e+07	2.55914e+07
457	(18:1/20:4)	M+HCOO	852.576	C47H83O10NP	12.5174	12.508	12.5174	12.524	12.5174	12.548	12.5174	12.511	1.56109e+08	1.75805e+08	1.31315e+08	1.36205e+08
458	(18:0/20:5)	M+HCOO	852.576	C47H83O10NP	12.9155	12.921	12.9155	12.926	12.9155	12.919	12.9155	12.916	4.06887e+08	3.95206e+08	4.44138e+08	4.39051e+08
459	(16:0e/22:5)	M+HCOO	838.597	C47H85O9NP	13.313	13.332	13.313	13.325	13.313	13.33	13.313	13.328	8.28616e+07	6.35194e+07	2.6054e+07	2.37785e+07
460	(18:0e/20:5)	M+HCOO	838.597	C47H85O9NP	13.7155	13.729	13.7155	13.749	13.7155	13.728	13.7155	13.734	1.51547e+08	1.10005e+08	1.32448e+08	9.3584e+07
461	(18:1e/20:4)	M+HCOO	838.597	C47H85O9NP	14.4258	14.459	14.4258	14.479	14.4258	14.495	14.4258	14.477	1.5762e+06	8.13756e+06	474966	9.36981e+06
462	(16:1/22:5)	M+HCOO	850.56	C47H81O10NP	11.2888	11.373	11.2888	11.382	11.2888	11.388	11.2888	11.385	2.53357e+07	1.80029e+07	1.03088e+07	4.06713e+06
463	(18:1e/20:5)	M+HCOO	836.581	C47H83O9NP	12.3091	12.324	12.3091	12.31	12.3091	12.325	12.3091	12.328	3.07447e+07	2.43113e+07	2.35055e+07	1.67408e+07
464	(16:0e/22:6)	M+HCOO	836.581	C47H83O9NP	12.8548	12.869	12.8548	12.856	12.8548	12.886	12.8548	12.859	2.30722e+08	2.08695e+08	1.28448e+08	1.23003e+08
465	(18:3/20:4)	M+HCOO	848.545	C47H79O10NP	10.0027	9.995	10.0027	9.999	10.0027	9.987	10.0027	9.999	1.62714e+06	1.0697e+06	820733	217072
466	(20:5/18:2)	M+HCOO	848.545	C47H79O10NP	10.4028	10.429	10.4028	10.407	10.4028	10.39	10.4028	10.414	2.62467e+08	2.73494e+08	3.79333e+08	1.84666e+08
467	(16:1e/22:6)	M+HCOO	834.565	C47H81O9NP	11.4561	11.463	11.4561	11.468	11.4561	11.454	11.4561	11.451	1.31664e+07	1.23493e+07	7.41064e+06	6.73001e+06
468	(18:2e/20:5)	M+CH3COO	848.581	C48H83O9NP	13.325	13.326	13.325	13.325	13.325	13.316	13.325	13.331	522049	2.11264e+06	128662	1.60264e+06
469	(18:3/20:5)	M+HCOO	846.529	C47H77O10NP	9.42071	9.425	9.42071	9.405	9.42071	9.449	9.42071	9.445	2.65321e+07	2.427e+07	2.36035e+07	8.8785e+06
470	(18:3e/20:5)	M+HCOO	832.55	C47H79O9NP	10.1255	10.133	10.1255	10.132	10.1255	10.142	10.1255	10.136	5.06705e+06	3.2975e+06	107290	13966.9
471	(18:4/20:5)	M+HCOO	844.513	C47H75O10NP	8.67819	8.713	8.67819	8.672	8.67819	8.7	8.67819	8.697	1.06929e+06	1.22041e+06	2.01638e+06	204680
472	(18:1/21:0)	M+HCOO	874.654	C48H93O10NP	16.9716	17.014	16.9716	17.022	16.9716	17	16.9716	16.979	3.00299e+07	3.25974e+07	2.15436e+07	3.55715e+07
473	(18:2/21:0)	M+HCOO	872.639	C48H91O10NP	16.0373	16.044	16.0373	16.068	16.0373	16.045	16.0373	16.035	4.77447e+07	4.02794e+07	2.53353e+07	4.22181e+07
474	(18:2/21:1)	M+HCOO	870.623	C48H89O10NP	14.6937	14.942	14.6937	14.531	14.6937	14.758	14.6937	14.725	6.38902e+06	6.1462e+06	2.94998e+06	5.33744e+06
475	(19:0/20:3)	M+HCOO	870.623	C48H89O10NP	15.0342	15.136	15.0342	15.098	15.0342	14.785	15.0342	15.104	9.69887e+06	6.46828e+06	3.42113e+06	3.58303e+06
476	(19:0/20:4)	M+HCOO	868.607	C48H87O10NP	14.3549	14.324	14.3549	14.296	14.3549	14.333	14.3549	14.314	6.31502e+06	5.13042e+06	2.15813e+06	2.94441e+06
477	(19:0/20:5)	M+HCOO	866.592	C48H85O10NP	13.3658	13.367	13.3658	13.39	13.3658	13.377	13.3658	13.377	1.34661e+07	1.09229e+07	9.94449e+06	7.18765e+06
478	(19:1/20:5)	M+HCOO	864.576	C48H83O10NP	11.9914	12.023	11.9914	11.98	11.9914	12.012	11.9914	12.008	7.46258e+06	5.85132e+06	8.12557e+06	4.3351e+06
479	(17:0/22:6)	M+HCOO	864.576	C48H83O10NP	12.5497	12.538	12.5497	12.543	12.5497	12.541	12.5497	12.544	1.98302e+07	9.42307e+06	1.15223e+07	1.2715e+07
480	(17:1/22:6)	M+HCOO	862.56	C48H81O10NP	11.3851	11.376	11.3851	11.385	11.3851	11.386	11.3851	11.402	4.36014e+06	3.54922e+06	5.19402e+06	3.0184e+06
481	(16:0/24:0)	M+HCOO	890.686	C49H97O10NP	18.2746	18.268	18.2746	18.283	18.2746	18.293	18.2746	18.285	5.99618e+06	9.51029e+06	5.41861e+06	9.47745e+06
482	(18:1/22:0)	M+HCOO	888.67	C49H95O10NP	17.4688	17.508	17.4688	17.477	17.4688	17.482	17.4688	17.501	5.73125e+07	8.87426e+07	5.37473e+07	7.85919e+07
483	(22:0/18:2)	M+HCOO	886.654	C49H93O10NP	16.6179	16.632	16.6179	16.614	16.6179	16.62	16.6179	16.617	5.20279e+07	6.18994e+07	3.39465e+07	4.6306e+07
484	(22:0/18:3)	M+HCOO	884.639	C49H91O10NP	15.7451	15.768	15.7451	15.772	15.7451	15.783	15.7451	15.735	8.26498e+06	6.26086e+06	2.33511e+06	3.31807e+06
485	(18:3/22:1)	M+HCOO	882.623	C49H89O10NP	14.3196	14.398	14.3196	14.262	14.3196	14.19	14.3196	14.248	1.57284e+07	1.48522e+07	1.39589e+07	1.15373e+07
486	(20:2/20:2)	M+HCOO	882.623	C49H89O10NP	14.8085	14.819	14.8085	14.834	14.8085	14.816	14.8085	14.812	1.50778e+07	1.31201e+07	7.16454e+06	1.12418e+07
487	(20:0/20:4)	M+HCOO	882.623	C49H89O10NP	15.178	15.176	15.178	15.186	15.178	15.19	15.178	15.169	6.4925e+06	7.4429e+06	2.70369e+06	4.56526e+06
488	(20:0e/20:4)	M+HCOO	868.644	C49H91O9NP	15.9382	15.941	15.9382	15.979	15.9382	15.971	15.9382	15.978	1.09173e+06	1.1472e+06	779832	1.34783e+06
489	(18:0/22:5)	M+HCOO	880.607	C49H87O10NP	13.869	13.868	13.869	13.884	13.869	13.854	13.869	13.885	3.95465e+07	2.89515e+07	3.03398e+07	3.43348e+07
490	(20:0/20:5)	M+HCOO	880.607	C49H87O10NP	14.3718	14.384	14.3718	14.39	14.3718	14.387	14.3718	14.381	3.71959e+07	3.58461e+07	2.55744e+07	3.00059e+07
491	(18:0e/22:5)	M+HCOO	866.628	C49H89O9NP	14.6606	14.671	14.6606	14.657	14.6606	14.66	14.6606	14.665	3.07146e+07	2.05207e+07	1.79483e+07	1.4619e+07
492	(20:0e/20:5)	M+HCOO	866.628	C49H89O9NP	15.0872	15.144	15.0872	15.164	15.0872	15.068	15.0872	15.079	8.38527e+06	6.48109e+06	5.21665e+06	4.42648e+06
493	(22:4/18:2)	M+CH3COO	892.607	C50H87O10NP	11.8687	11.861	11.8687	11.838	11.8687	11.87	11.8687	11.841	473372	718474	3.96848e+06	881471
494	(20:1/20:5)	M+HCOO	878.592	C49H85O10NP	12.9343	13.098	12.9343	12.903	12.9343	12.887	12.9343	12.893	2.38461e+07	2.85018e+07	4.02136e+07	1.92715e+07
495	(18:1e/22:5)	M+HCOO	864.612	C49H87O9NP	13.2931	13.284	13.2931	13.301	13.2931	13.309	13.2931	13.276	7.28428e+06	6.29472e+06	4.26819e+06	6.60667e+06
496	(20:1e/20:5)	M+HCOO	864.612	C49H87O9NP	13.6908	13.695	13.6908	13.692	13.6908	13.712	13.6908	13.683	5.17779e+06	3.78076e+06	3.66443e+06	2.60614e+06
497	(18:0e/22:6)	M+HCOO	864.612	C49H87O9NP	14.2455	14.238	14.2455	14.264	14.2455	14.252	14.2455	14.261	1.19822e+08	8.75699e+07	1.39349e+08	1.29019e+08
498	(22:5/18:2)	M+HCOO	876.576	C49H83O10NP	11.4032	11.431	11.4032	11.425	11.4032	11.427	11.4032	11.416	1.28804e+07	1.14605e+07	1.35174e+07	1.18949e+07
499	(18:1e/22:6)	M+HCOO	862.597	C49H85O9NP	12.8683	12.886	12.8683	12.872	12.8683	12.887	12.8683	12.867	1.40717e+07	1.41489e+07	1.46933e+07	1.38823e+07
500	(18:3/22:5)	M+CH3COO	888.576	C50H83O10NP	9.8994	9.895	9.8994	9.899	9.8994	9.917	9.8994	9.908	601067	421813	1.48313e+06	567951
501	(20:3/20:5)	M+HCOO	874.56	C49H81O10NP	10.4207	10.428	10.4207	10.442	10.4207	10.446	10.4207	10.46	1.63255e+06	1.52747e+06	484930	508045
502	(18:2e/22:6)	M+HCOO	860.581	C49H83O9NP	11.7108	11.745	11.7108	11.712	11.7108	11.911	11.7108	11.895	1.66302e+06	2.11556e+06	299137	180149
503	(20:5/20:4)	M+HCOO	872.545	C49H79O10NP	10.055	10.079	10.055	10.088	10.055	10.09	10.055	10.111	3.96303e+07	4.75206e+07	3.39294e+07	1.9698e+07
504	(18:3e/22:6)	M+HCOO	858.565	C49H81O9NP	10.6846	10.674	10.6846	10.671	10.6846	10.684	10.6846	10.661	910095	844083	59215.9	6656.28
505	(25:0/16:0)	M+HCOO	904.701	C50H99O10NP	18.5559	18.576	18.5559	18.555	18.5559	18.58	18.5559	18.572	14903.1	11771.9	17150	56553.8
506	(18:1/23:0)	M+HCOO	902.686	C50H97O10NP	17.9054	17.942	17.9054	17.924	17.9054	17.936	17.9054	17.905	1.34545e+07	2.26157e+07	1.00854e+07	1.59656e+07
507	(18:2/23:0)	M+HCOO	900.67	C50H95O10NP	17.1561	17.156	17.1561	17.167	17.1561	17.168	17.1561	17.153	1.32785e+07	1.47684e+07	8.98827e+06	1.36459e+07
508	(18:2/23:1)	M+HCOO	898.654	C50H93O10NP	15.9146	15.947	15.9146	15.98	15.9146	15.971	15.9146	15.966	3.28422e+06	6.49477e+06	3.53448e+06	3.98558e+06
509	(19:0/22:5)	M+HCOO	894.623	C50H89O10NP	14.5264	14.533	14.5264	14.53	14.5264	14.536	14.5264	14.553	2.50984e+06	2.14556e+06	1.15724e+06	1.86334e+06
510	(20:5/21:0)	M+HCOO	894.623	C50H89O10NP	14.9136	14.927	14.9136	14.919	14.9136	14.94	14.9136	14.929	9.25923e+06	6.579e+06	5.45546e+06	6.08217e+06
511	(19:0/22:6)	M+HCOO	892.607	C50H87O10NP	14.089	14.141	14.089	14.122	14.089	14.133	14.089	14.114	9.96625e+06	8.26878e+06	7.59736e+06	9.1575e+06
512	(19:1/22:6)	M+HCOO	890.592	C50H85O10NP	12.7518	12.789	12.7518	12.733	12.7518	12.749	12.7518	12.714	1.85046e+06	1.73219e+06	2.55361e+06	1.26978e+06
513	(42:0)	M+CH3COO	932.733	C52H103O10NP	18.138	18.207	18.138	18.212	18.138	18.145	18.138	18.133	71875.1	135915	781645	303905
514	(26:0/16:0)	M+HCOO	918.717	C51H101O10NP	18.9552	18.976	18.9552	18.972	18.9552	18.978	18.9552	18.974	1.31138e+06	2.42532e+06	1.27861e+06	2.14654e+06
515	(18:1/24:0)	M+HCOO	916.701	C51H99O10NP	18.3007	18.315	18.3007	18.309	18.3007	18.324	18.3007	18.32	3.95571e+07	8.47921e+07	3.69554e+07	5.81094e+07
516	(20:5/22:5)	M+HCOO	898.56	C51H81O10NP	10.1578	10.169	10.1578	10.165	10.1578	10.16	10.1578	10.142	3.37169e+06	3.40655e+06	3.78842e+06	2.43299e+06
517	(20:4/22:6)	M+HCOO	898.56	C51H81O10NP	10.6275	10.636	10.6275	10.627	10.6275	10.617	10.6275	10.646	2.22135e+07	2.63978e+07	1.85585e+07	1.4452e+07
518	(18:1/24:1)	M+HCOO	914.686	C51H97O10NP	17.3691	17.378	17.3691	17.371	17.3691	17.391	17.3691	17.379	7.29239e+07	1.8163e+08	8.51462e+07	1.2803e+08
519	(24:0/18:2)	M+HCOO	914.686	C51H97O10NP	17.6373	17.638	17.6373	17.655	17.6373	17.636	17.6373	17.637	2.26557e+07	4.41578e+07	2.05795e+07	2.66148e+07
520	(24:1/18:2)	M+HCOO	912.67	C51H95O10NP	16.4837	16.505	16.4837	16.495	16.4837	16.489	16.4837	16.457	5.64739e+07	1.36116e+08	6.17324e+07	7.99497e+07
521	(22:0/20:3)	M+HCOO	912.67	C51H95O10NP	16.9016	16.902	16.9016	16.937	16.9016	16.945	16.9016	16.928	2.92345e+06	3.4361e+06	970361	1.27523e+06
522	(24:2/18:2)	M+HCOO	910.654	C51H93O10NP	15.4502	15.47	15.4502	15.453	15.4502	15.473	15.4502	15.462	1.26122e+07	3.09546e+07	1.04311e+07	1.23701e+07
523	(22:0/20:4)	M+HCOO	910.654	C51H93O10NP	16.3898	16.388	16.3898	16.376	16.3898	16.407	16.3898	16.378	4.10863e+06	5.00473e+06	1.94983e+06	3.10501e+06
524	(18:3/24:2)	M+HCOO	908.639	C51H91O10NP	14.6578	14.694	14.6578	14.712	14.6578	14.735	14.6578	14.741	415581	179095	467375	649901
525	(22:1/20:4)	M+HCOO	908.639	C51H91O10NP	15.1253	15.136	15.1253	15.148	15.1253	15.147	15.1253	15.138	3.20552e+06	3.83301e+06	3.88494e+06	2.10935e+06
526	(22:0/20:5)	M+HCOO	908.639	C51H91O10NP	15.5397	15.556	15.5397	15.555	15.5397	15.554	15.5397	15.531	9.46105e+06	7.17133e+06	5.38825e+06	6.8347e+06
527	(20:5/22:1)	M+HCOO	906.623	C51H89O10NP	14.2502	14.265	14.2502	14.264	14.2502	14.254	14.2502	14.253	5.7775e+06	4.64991e+06	1.31697e+07	3.45919e+06
528	(20:0/22:6)	M+HCOO	906.623	C51H89O10NP	14.7614	14.764	14.7614	14.78	14.7614	14.759	14.7614	14.778	8.99965e+06	1.03278e+07	9.42643e+06	1.16955e+07
529	(20:0e/22:6)	M+HCOO	892.644	C51H91O9NP	15.5119	15.533	15.5119	15.538	15.5119	15.525	15.5119	15.529	3.76273e+06	3.65371e+06	4.30577e+06	5.29315e+06
530	(20:2/22:5)	M+HCOO	904.607	C51H87O10NP	12.6654	12.699	12.6654	12.71	12.6654	12.715	12.6654	12.714	1.08523e+06	858593	777887	530596
531	(20:1/22:6)	M+HCOO	904.607	C51H87O10NP	13.4062	13.415	13.4062	13.408	13.4062	13.428	13.4062	13.41	1.23376e+07	1.18387e+07	3.18135e+07	1.54659e+07
532	(20:1e/22:6)	M+HCOO	890.628	C51H89O9NP	14.1908	14.21	14.1908	14.187	14.1908	14.173	14.1908	14.201	1.43515e+06	1.45767e+06	2.16454e+06	1.61612e+06
533	(20:2/22:6)	M+HCOO	902.592	C51H85O10NP	12.2441	12.258	12.2441	12.26	12.2441	12.26	12.2441	12.282	1.40244e+07	1.0793e+07	2.07924e+07	1.2968e+07
534	(22:5/20:4)	M+CH3COO	914.592	C52H85O10NP	10.6268	10.595	10.6268	10.626	10.6268	10.616	10.6268	10.628	662374	848294	2.36751e+06	1.51791e+06
535	(25:0/18:1)	M+HCOO	930.717	C52H101O10NP	18.651	18.669	18.651	18.656	18.651	18.648	18.651	18.677	2.47625e+06	5.41063e+06	1.86273e+06	2.35627e+06
536	(25:1/18:1)	M+HCOO	928.701	C52H99O10NP	17.8111	17.822	17.8111	17.818	17.8111	17.84	17.8111	17.838	3.67525e+06	9.86246e+06	3.18578e+06	3.92489e+06
537	(25:0/18:2)	M+HCOO	928.701	C52H99O10NP	18.0682	18.082	18.0682	18.079	18.0682	18.053	18.0682	18.049	1.52887e+06	2.92022e+06	1.067e+06	1.26754e+06
538	(25:1/18:2)	M+HCOO	926.686	C52H97O10NP	17.0295	17.054	17.0295	17.023	17.0295	17.062	17.0295	17.025	2.28968e+06	5.17474e+06	1.87147e+06	2.31342e+06
539	(20:4/23:0)	M+HCOO	924.67	C52H95O10NP	16.9292	16.951	16.9292	16.931	16.9292	16.947	16.9292	16.944	1.02858e+06	1.12996e+06	463764	760147
540	(22:5/21:0)	M+HCOO	922.654	C52H93O10NP	15.7541	15.763	15.7541	15.746	15.7541	15.783	15.7541	15.764	1.03053e+06	1.10091e+06	539159	642136
541	(20:5/23:0)	M+HCOO	922.654	C52H93O10NP	16.1373	16.151	16.1373	16.128	16.1373	16.138	16.1373	16.142	3.52179e+06	3.08492e+06	2.71568e+06	2.71096e+06
542	(22:6/21:0)	M+HCOO	920.639	C52H91O10NP	15.3782	15.395	15.3782	15.375	15.3782	15.405	15.3782	15.385	3.64433e+06	2.55795e+06	3.51695e+06	3.94643e+06
543	(26:0/18:1)	M+HCOO	944.733	C53H103O10NP	18.9702	18.976	18.9702	18.988	18.9702	18.979	18.9702	18.973	9.02639e+06	1.75283e+07	9.06846e+06	1.33852e+07
544	(22:4/22:6)	M+CH3COO	940.607	C54H87O10NP	11.1911	11.197	11.1911	11.182	11.1911	11.194	11.1911	11.187	578612	625589	2.29186e+06	977899
545	(22:5/22:6)	M+HCOO	924.576	C53H83O10NP	10.6957	10.701	10.6957	10.671	10.6957	10.71	10.6957	10.723	1.40816e+06	1.3143e+06	1.5791e+06	1.30558e+06
546	(22:6/22:6)	M+HCOO	922.56	C53H81O10NP	10.237	10.259	10.237	10.215	10.237	10.23	10.237	10.243	1.92735e+07	1.99779e+07	2.64417e+07	1.87137e+07
547	(26:1/18:1)	M+HCOO	942.717	C53H101O10NP	18.2027	18.212	18.2027	18.207	18.2027	18.204	18.2027	18.212	3.19379e+07	6.09338e+07	3.55185e+07	4.97719e+07
548	(26:1/18:2)	M+HCOO	940.701	C53H99O10NP	17.4791	17.508	17.4791	17.467	17.4791	17.481	17.4791	17.502	2.97594e+07	6.18149e+07	3.13683e+07	4.05118e+07
549	(26:0/18:3)	M+HCOO	940.701	C53H99O10NP	17.8609	17.854	17.8609	17.815	17.8609	17.854	17.8609	17.752	674582	1.05288e+06	178785	277483
550	(26:1/18:3)	M+HCOO	938.686	C53H97O10NP	16.5912	16.604	16.5912	16.59	16.5912	16.602	16.5912	16.615	1.04499e+07	2.435e+07	8.57686e+06	9.62161e+06
551	(24:0/20:4)	M+HCOO	938.686	C53H97O10NP	17.449	17.468	17.449	17.468	17.449	17.483	17.449	17.425	1.24193e+06	3.79914e+06	1.18978e+06	1.19414e+06
552	(24:1/20:4)	M+HCOO	936.67	C53H95O10NP	16.2723	16.323	16.2723	16.268	16.2723	16.291	16.2723	16.304	2.78923e+06	8.17647e+06	2.74202e+06	2.72985e+06
553	(24:0/20:5)	M+HCOO	936.67	C53H95O10NP	16.7267	16.739	16.7267	16.72	16.7267	16.749	16.7267	16.73	2.49698e+06	3.65799e+06	2.33803e+06	2.14194e+06
554	(22:1/22:5)	M+HCOO	934.654	C53H93O10NP	15.1443	15.147	15.1443	15.221	15.1443	15.121	15.1443	15.151	410435	1.11152e+06	983380	114635
555	(24:1/20:5)	M+HCOO	934.654	C53H93O10NP	15.4367	15.457	15.4367	15.449	15.4367	15.458	15.4367	15.461	2.53831e+06	6.07721e+06	4.11942e+06	3.17001e+06
556	(22:0/22:6)	M+HCOO	934.654	C53H93O10NP	15.9781	16.002	15.9781	15.975	15.9781	16.015	15.9781	15.996	4.33259e+06	2.49593e+06	3.75439e+06	4.931e+06
557	(22:1/22:6)	M+HCOO	932.639	C53H91O10NP	14.7185	14.727	14.7185	14.714	14.7185	14.741	14.7185	14.72	3.83288e+06	2.42823e+06	1.32983e+07	2.92204e+06
558	(27:1/18:1)	M+HCOO	956.733	C54H103O10NP	18.5567	18.592	18.5567	18.571	18.5567	18.562	18.5567	18.552	731226	1.35345e+06	576357	683195
559	(22:6/23:0)	M+HCOO	948.67	C54H95O10NP	16.5549	16.565	16.5549	16.581	16.5549	16.57	16.5549	16.577	1.40429e+06	540031	1.86756e+06	1.7277e+06
560	(28:1/18:1)	M+HCOO	970.748	C55H105O10NP	18.8823	18.875	18.8823	18.89	18.8823	18.875	18.8823	18.871	1.98486e+06	4.00971e+06	3.07672e+06	3.8036e+06
561	(28:1/18:2)	M+HCOO	968.733	C55H103O10NP	18.2395	18.268	18.2395	18.249	18.2395	18.249	18.2395	18.268	9.32177e+06	1.58662e+07	1.13365e+07	1.16059e+07
562	(26:1/20:4)	M+HCOO	964.701	C55H99O10NP	17.3342	17.355	17.3342	17.34	17.3342	17.346	17.3342	17.342	719935	2.59553e+06	991720	807506
563	(26:1/20:5)	M+HCOO	962.686	C55H97O10NP	16.5375	16.639	16.5375	16.604	16.5375	16.621	16.5375	16.604	706151	2.52181e+06	1.27796e+06	1.06002e+06
564	(24:0/22:6)	M+HCOO	962.686	C55H97O10NP	17.0936	17.11	17.0936	17.123	17.0936	17.122	17.0936	17.1	842779	670374	977805	1.10986e+06
565	(24:1/22:6)	M+HCOO	960.67	C55H95O10NP	15.8749	15.899	15.8749	15.906	15.8749	15.923	15.8749	15.902	909194	1.1653e+06	1.96339e+06	1.56845e+06
566	(24:0/24:1)	M+HCOO	1000.8	C57H111O10NP	19.9221	19.916	19.9221	19.944	19.9221	19.944	19.9221	19.934	281639	1.10633e+06	387262	572636
567	(24:1/24:1)	M+HCOO	998.779	C57H109O10NP	19.3773	19.445	19.3773	19.367	19.3773	19.436	19.3773	19.444	449086	1.19589e+06	454886	808136
PE
1	(16:0e)	M+Na	476.275	C21H44O7NPNa	3.389	3.38253	3.386	3.38253	3.385	3.38253	3.358	3.38253	6.69489e+06	6.72572e+06	3.78305e+06	2.23516e+06
2	(8:0e/8:0)	M+H	454.293	C21H45O7NP	15.54	15.5316	15.508	15.5316	15.529	15.5316	15.503	15.5316	5.69438e+06	463995	615738	153176
3	(16:1e)	M+Na	474.259	C21H42O7NPNa	2.235	2.26816	2.25	2.26816	2.255	2.26816	2.398	2.26816	3.20982e+06	907369	2.19698e+06	126396
4	(17:0e)	M+H	468.308	C22H47O7NP	4.187	4.17948	4.18	4.17948	4.173	4.17948	4.176	4.17948	9.96761e+06	1.15354e+07	2.49205e+06	2.3343e+06
5	(17:1e)	M+H	466.293	C22H45O7NP	2.732	2.73222	2.921	2.73222	2.732	2.73222	2.771	2.73222	1.71096e+07	1.1382e+06	1.13471e+07	548985
6	(18:0e)	M+H	482.324	C23H49O7NP	5.103	5.09575	5.085	5.09575	5.092	5.09575	5.1	5.09575	5.17656e+07	6.68845e+07	2.2327e+07	2.69213e+07
7	(8:1e/10:0)	M+Na	502.29	C23H46O7NPNa	3.348	3.333	3.507	3.333	3.373	3.333	3.349	3.333	2.75525e+07	667977	2.25357e+07	1.37492e+06
8	(18:1e)	M+Na	502.29	C23H46O7NPNa	3.614	3.60236	3.604	3.60236	3.596	3.60236	3.624	3.60236	7.41377e+06	7.19599e+06	6.62507e+06	4.8182e+06
9	(18:2e)	M+Na	500.275	C23H44O7NPNa	13.987	13.97	13.98	13.97	13.974	13.97	13.964	13.97	1.60359e+07	2.1821e+06	2.37399e+06	2.42408e+06
10	(18:3e)	M+H	476.277	C23H43O7NP	1.993	1.99585	2.093	1.99585	1.967	1.99585	2.092	1.99585	9.59697e+07	3.955e+06	4.84061e+07	2.20539e+06
11	(19:0e)	M+H	496.34	C24H51O7NP	5.717	5.725	5.739	5.725	5.713	5.725	5.739	5.725	1.05939e+06	855460	299970	161977
12	(19:1e)	M+H	494.324	C24H49O7NP	4.106	4.086	4.318	4.086	4.036	4.086	4.299	4.086	2.57704e+06	393155	1.27517e+06	171583
13	(19:4e)	M+H	488.277	C24H43O7NP	2.026	2.03029	2.035	2.03029	2.009	2.03029	2.124	2.03029	5.78866e+06	135112	2.21848e+06	34163.9
14	(19:5e)	M+H	486.262	C24H41O7NP	1.706	1.7115	1.806	1.7115	1.697	1.7115	1.7115	1.7115	3.45887e+06	85931.4	1.57843e+06	11802.8
15	(20:0e)	M+H	510.355	C25H53O7NP	6.774	6.7777	6.934	6.7777	6.77	6.7777	6.758	6.7777	2.41105e+06	420739	1.03397e+06	40392.7
16	(20:1e)	M+Na	530.322	C25H50O7NPNa	5.278	5.26577	5.275	5.26577	5.296	5.26577	5.293	5.26577	3.13839e+06	1.81331e+06	700335	762594
17	(20:2e)	M+Na	528.306	C25H48O7NPNa	15.486	15.5018	15.515	15.5018	15.485	15.5018	15.52	15.5018	9.82082e+06	116196	776558	160708
18	(20:3e)	M+Na	526.29	C25H46O7NPNa	2.242	2.25403	2.31	2.25403	2.224	2.25403	2.369	2.25403	9.66711e+08	9.36196e+07	9.38739e+08	1.5576e+08
19	(20:4e)	M+Na	524.275	C25H44O7NPNa	2.388	2.40868	2.506	2.40868	2.4	2.40868	2.522	2.40868	4.02137e+07	1.94822e+06	2.9254e+07	3.891e+06
20	(20:5e)	M+Na	522.259	C25H42O7NPNa	1.959	1.91294	1.903	1.91294	1.907	1.91294	1.988	1.91294	1.04893e+08	6.82355e+06	9.92892e+07	1.306e+07
21	(21:4e)	M+H	516.308	C26H47O7NP	2.769	2.76115	2.592	2.76115	2.567	2.76115	2.575	2.76115	6.0031e+06	913454	2.20362e+06	966491
22	(21:5e)	M+H	514.293	C26H45O7NP	2.153	2.17396	2.178	2.17396	2.165	2.17396	2.305	2.17396	1.51761e+07	438764	6.60925e+06	297796
23	(22:0e)	M+H	538.387	C27H57O7NP	8.586	8.588	8.571	8.588	8.619	8.588	8.579	8.588	1.15004e+06	146479	705446	83272
24	(22:1e)	M+H	536.371	C27H55O7NP	6.912	6.94404	6.99	6.94404	6.927	6.94404	6.958	6.94404	2.26675e+06	16378.5	2.71765e+06	80351.6
25	(22:2)	M+H	548.335	C27H51O8NP	16.614	16.584	16.599	16.584	16.336	16.584	16.579	16.584	5.74663e+06	47440.1	0	454203
26	(22:5e)	M+Na	550.29	C27H46O7NPNa	2.517	2.53203	2.7	2.53203	2.522	2.53203	2.667	2.53203	8.86654e+06	297394	2.42521e+06	398070
27	(23:2e)	M+Na	570.353	C28H54O7NPNa	3.713	3.709	3.713	3.709	3.7	3.709	3.713	3.709	7.27094e+06	2.40846e+07	5.50037e+06	7.83016e+06
28	(24:2)	M+H	576.366	C29H55O8NP	5.128	5.1389	5.211	5.1389	4.887	5.1389	4.952	5.1389	2.16584e+06	12439.9	3316.09	3988.89
29	(30:0e)	M+Na	672.494	C35H72O7NPNa	12.349	12.322	12.278	12.322	12.319	12.322	12.319	12.322	6.49768e+06	1.30008e+07	3.41247e+06	1.74052e+07
30	(14:0p/16:0)	M+H	648.496	C35H71O7NP	13.485	13.4622	13.478	13.4622	13.435	13.4622	13.458	13.4622	1.95508e+06	4.87047e+06	79323.7	4.56658e+06
31	(16:1/14:0)	M+H	662.476	C35H69O8NP	11.322	11.3375	11.31	11.3375	11.29	11.3375	11.321	11.3375	501285	7.52019e+06	92732.4	607206
32	(30:1e)	M+H	648.496	C35H71O7NP	13.482	13.482	13.475	13.482	13.435	13.482	13.458	13.482	1.90671e+06	4.80667e+06	86934.7	4.41565e+06
33	(31:1e)	M+H	662.512	C36H73O7NP	11.6298	11.634	11.6298	11.622	11.6298	11.642	11.6298	11.642	1.2142e+06	4.32934e+06	0	954326
34	(16:0p/16:0)	M+H	676.528	C37H75O7NP	12.369	12.35	12.369	12.37	12.369	12.362	12.369	12.365	3.92551e+07	7.52727e+07	4.56448e+06	4.05587e+07
35	(32:1)	M+Na	712.489	C37H72O8NPNa	10.686	10.668	10.663	10.668	10.689	10.668	10.676	10.668	1.31528e+06	1.50658e+06	177519	308746
36	(18:1/14:0)	M+Na	712.489	C37H72O8NPNa	11.29	11.301	11.319	11.301	11.307	11.301	11.23	11.301	9.59858e+06	2.7871e+06	2.26326e+06	7.04427e+06
37	(16:0/16:1)	M+H	690.507	C37H73O8NP	12.844	12.8635	12.857	12.8635	12.854	12.8635	12.835	12.8635	2.27991e+07	4.9334e+07	1.4657e+07	2.01373e+07
38	(16:0p/16:1)	M+H	674.512	C37H73O7NP	12.3571	12.351	12.3571	12.346	12.3571	12.421	12.3571	12.363	2.11099e+07	5.31695e+07	4.75242e+06	3.90518e+07
39	(14:0/18:2)	M+Na	710.473	C37H70O8NPNa	10.344	10.3391	10.327	10.3391	10.326	10.3391	10.327	10.3391	2.99098e+06	2.53084e+06	758344	856425
40	(14:0p/18:2)	M+H	672.496	C37H71O7NP	12.35	12.315	12.28	12.315	12.32	12.315	12.32	12.315	6.39099e+06	1.27705e+07	1.7277e+06	1.7261e+07
41	(32:3e)	M+H	672.496	C37H71O7NP	12.351	12.335	12.278	12.335	12.32	12.335	12.32	12.335	6.3455e+06	1.273e+07	1.72976e+06	1.73247e+07
42	(18:0p/15:0)	M+H	690.543	C38H77O7NP	13.049	13.053	13.049	13.058	13.049	13.049	13.049	13.05	8.91523e+06	1.03892e+07	0	4.08986e+06
43	(33:1e)	M+H	690.543	C38H77O7NP	15.309	15.3131	15.315	15.3131	15.084	15.3131	15.297	15.3131	8.996e+06	9.10718e+06	0	3.97912e+06
44	(16:0p/17:1)	M+H	688.528	C38H75O7NP	14.234	14.2609	14.275	14.2609	14.213	14.2609	14.269	14.2609	9.82507e+06	3.24185e+07	1.31395e+06	1.5315e+07
45	(34:0e)	M+Na	728.556	C39H80O7NPNa	15.16	15.137	15.152	15.137	15.139	15.137	15.134	15.137	2.04671e+08	5.77364e+08	6.86162e+07	4.88369e+08
46	(18:0p/16:0)	M+H	704.559	C39H79O7NP	16.162	16.1502	16.162	16.1502	16.154	16.1502	16.162	16.1502	1.05156e+08	2.79212e+08	1.60711e+07	1.55093e+08
47	(18:0/16:1)	M+Na	740.52	C39H76O8NPNa	12.842	12.8462	12.854	12.8462	12.846	12.8462	12.835	12.8462	1.3242e+08	1.23929e+08	4.81879e+07	1.05051e+08
48	(34:1)	M+Na	740.52	C39H76O8NPNa	14.294	14.261	14.274	14.261	14.244	14.261	14.276	14.261	4.9321e+06	5.88182e+06	8.65661e+06	9.25126e+06
49	(18:1e/16:0)	M+Na	726.541	C39H78O7NPNa	16.145	16.1731	16.159	16.1731	16.156	16.1731	16.148	16.1731	7.313e+06	1.7459e+07	1.4291e+06	9.99504e+06
50	(16:0p/18:1)	M+H	702.543	C39H77O7NP	12.6368	12.588	12.6368	12.643	12.6368	12.623	12.6368	12.641	1.56236e+08	4.09673e+08	3.86327e+07	3.16383e+08
51	(16:0/18:2)	M+Na	738.504	C39H74O8NPNa	11.819	11.8204	11.804	11.8204	11.829	11.8204	11.804	11.8204	4.41279e+08	3.91332e+08	2.55253e+08	3.44766e+08
52	(34:2)	M+Na	738.504	C39H74O8NPNa	13.089	13.114	13.09	13.114	13.105	13.114	13.093	13.114	4.905e+06	4.29104e+06	5.86434e+06	6.37581e+06
53	(16:0p/18:2)	M+H	700.528	C39H75O7NP	11.6337	11.632	11.6337	11.62	11.6337	11.643	11.6337	11.642	1.28474e+08	2.911e+08	3.25094e+07	1.93611e+08
54	(16:1/18:2)	M+Na	736.489	C39H72O8NPNa	10.904	10.9034	10.894	10.9034	10.889	10.9034	10.919	10.9034	2.26276e+06	2.19578e+06	1.88288e+06	1.88811e+06
55	(34:3e)	M+H	700.528	C39H75O7NP	13.794	13.8252	13.801	13.8252	13.786	13.8252	13.79	13.8252	128076916	2.85813e+08	3.14014e+07	1.92156e+08
56	(16:0p/18:3)	M+H	698.512	C39H73O7NP	12.774	12.7777	12.777	12.7777	12.769	12.7777	12.772	12.7777	1.5546e+07	2.67235e+07	1.11538e+06	1.40568e+07
57	(34:4e)	M+H	698.512	C39H73O7NP	12.776	12.784	12.778	12.784	12.767	12.784	12.773	12.784	1.46264e+07	2.86151e+07	838617	1.36067e+07
58	(14:0p/20:4)	M+H	696.496	C39H71O7NP	12.018	12.0022	11.996	12.0022	11.985	12.0022	11.999	12.0022	3.34416e+06	7.45346e+06	52719.7	5.15685e+06
59	(14:0p/20:5)	M+H	694.481	C39H69O7NP	10.985	10.9753	10.948	10.9753	10.994	10.9753	10.972	10.9753	1.22373e+07	2.004e+07	3.20701e+06	2.09573e+07
60	(18:0p/17:0)	M+H	718.575	C40H81O7NP	14.4072	14.387	14.4072	14.393	14.4072	14.392	14.4072	14.407	1.01472e+07	1.95971e+07	357110	8.00558e+06
61	(18:0p/17:1)	M+H	716.559	C40H79O7NP	13.0523	13.051	13.0523	13.057	13.0523	13.05	13.0523	13.048	2.57492e+07	7.76153e+07	4.88302e+06	4.33484e+07
62	(17:1/18:1)	M+Na	752.52	C40H76O8NPNa	12.327	12.3191	12.331	12.3191	12.312	12.3191	12.32	12.3191	2.02743e+07	1.21625e+07	7.11591e+06	9.70328e+06
63	(35:2e)	M+Na	738.541	C40H78O7NPNa	13.212	13.221	13.219	13.221	13.224	13.221	13.213	13.221	3.27712e+07	4.44452e+07	8.84933e+06	2.21758e+07
64	(15:0/20:3)	M+Na	750.504	C40H74O8NPNa	11.643	11.6439	11.668	11.6439	11.67	11.6439	11.662	11.6439	3.01706e+06	3.25014e+06	3.4581e+06	3.37662e+06
65	(35:3e)	M+Na	736.525	C40H76O7NPNa	14.483	14.513	14.504	14.513	14.476	14.513	14.494	14.513	1.49372e+06	3.93368e+06	242347	2.19299e+06
66	(18:0/18:0)	M+Na	770.567	C41H82O8NPNa	14.473	14.3828	14.477	14.3828	14.461	14.3828	14.437	14.3828	6.92697e+07	4.3994e+07	7.23351e+07	4.72529e+07
67	(18:0p/18:0)	M+H	732.59	C41H83O7NP	14.9238	15.016	14.9238	15.027	14.9238	14.967	14.9238	14.994	4.97643e+06	2.03353e+07	1.13654e+06	1.57635e+07
68	(36:1)	M+Na	768.551	C41H80O8NPNa	15.54	15.5464	15.552	15.5464	15.535	15.5464	15.542	15.5464	7.99829e+06	9.84386e+06	1.20672e+07	1.57964e+07
69	(36:1e)	M+Na	754.572	C41H82O7NPNa	15.075	15.052	15.06	15.052	15.056	15.052	15.057	15.052	6.18145e+07	5.35938e+07	4.11743e+07	3.78866e+07
70	(18:0p/18:1)	M+H	730.575	C41H81O7NP	16.186	16.1856	16.164	16.1856	16.174	16.1856	16.163	16.1856	9.89167e+07	2.7373e+08	2.76497e+07	2.76249e+08
71	(36:2)	M+Na	766.536	C41H78O8NPNa	14.347	14.3559	14.305	14.3559	14.326	14.3559	14.494	14.3559	2.71278e+06	4.18068e+06	7.32599e+06	7.19706e+06
72	(18:1e/18:1)	M+Na	752.556	C41H80O7NPNa	16.186	16.1991	16.197	16.1991	16.169	16.1991	16.209	16.1991	6.86496e+06	1.77504e+07	2.50726e+06	1.84033e+07
73	(18:0p/18:2)	M+H	728.559	C41H79O7NP	12.901	12.887	12.901	12.909	12.901	12.886	12.901	12.907	206324603	5.81497e+08	6.78632e+07	4.93947e+08
74	(16:0/20:3)	M+Na	764.52	C41H76O8NPNa	12.389	12.3942	12.401	12.3942	12.392	12.3942	12.408	12.3942	8.72776e+08	7.42643e+08	7.58959e+08	9.37645e+08
75	(36:3e)	M+Na	750.541	C41H78O7NPNa	19.4812	19.4812	19.477	19.4812	19.4812	19.4812	19.46	19.4812	0	2.21194e+06	0	459756
76	(18:1p/18:2)	M+H	726.543	C41H77O7NP	13.721	13.7257	13.727	13.7257	13.707	13.7257	13.736	13.7257	6.32371e+07	6.11709e+07	1.98126e+07	2.00996e+07
77	(36:4e)	M+H	726.543	C41H77O7NP	14.048	14.032	14.048	14.027	14.048	14.038	14.048	14.023	2.27641e+07	5.28297e+07	4.13845e+06	2.83225e+07
78	(16:0p/20:4)	M+H	724.528	C41H75O7NP	13.503	13.4943	13.512	13.4943	13.496	13.4943	13.482	13.4943	1.81641e+08	4.74566e+08	2.82269e+07	2.60372e+08
79	(16:0/20:5)	M+Na	760.489	C41H72O8NPNa	11.821	11.8335	11.842	11.8335	11.828	11.8335	11.829	11.8335	1.19971e+07	1.16454e+07	1.00067e+07	1.1716e+07
80	(36:5e)	M+H	724.528	C41H75O7NP	13.504	13.5085	13.512	13.5085	13.497	13.5085	13.482	13.5085	1.81655e+08	4.74576e+08	2.84521e+07	2.60447e+08
81	(16:1p/20:4)	M+H	722.512	C41H73O7NP	12.207	12.1734	12.23	12.1734	11.985	12.1734	12.23	12.1734	5.11459e+06	1.64785e+07	859318	1.20562e+07
82	(16:0p/20:5)	M+H	722.512	C41H73O7NP	12.504	12.497	12.497	12.497	12.475	12.497	12.467	12.497	3.99323e+08	8.35149e+08	9.34176e+07	5.42276e+08
83	(16:1p/20:5)	M+H	720.496	C41H71O7NP	11.099	11.0868	11.088	11.0868	11.076	11.0868	11.09	11.0868	9.49893e+06	1.88018e+07	1.48296e+06	9.89669e+06
84	(37:2e)	M+Na	766.572	C42H82O7NPNa	14.551	14.573	14.43	14.573	14.803	14.573	14.567	14.573	8.39682e+06	2.4993e+07	4.23401e+06	1.61063e+07
85	(17:0/20:3)	M+Na	778.536	C42H78O8NPNa	13.093	13.0206	13.094	13.0206	13.102	13.0206	13.126	13.0206	7.2117e+07	6.34122e+07	4.05169e+07	7.1579e+07
86	(17:1/20:3)	M+Na	776.52	C42H76O8NPNa	11.785	11.759	11.757	11.759	11.762	11.759	11.769	11.759	4.29582e+06	4.36882e+06	5.94339e+06	2.90521e+06
87	(38:0)	M+H	776.616	C43H87O8NP	17.703	17.7226	17.716	17.7226	17.688	17.7226	17.711	17.7226	2.64995e+06	3.85691e+06	1.05072e+06	3.19449e+06
88	(20:0/18:1)	M+Na	796.583	C43H84O8NPNa	15.494	15.5118	15.503	15.5118	15.485	15.5118	15.503	15.5118	9.85984e+06	8.96094e+06	3.1569e+06	8.21482e+06
89	(38:1e)	M+Na	782.603	C43H86O7NPNa	15.955	15.952	15.947	15.952	15.962	15.952	15.921	15.952	1.47499e+07	1.06311e+07	854991	1.44565e+06
90	(18:0p/20:1)	M+H	758.606	C43H85O7NP	17.27	17.2586	17.24	17.2586	17.261	17.2586	17.251	17.2586	5.52206e+06	1.58782e+07	1.39461e+06	1.4703e+07
91	(20:1/18:1)	M+Na	794.567	C43H82O8NPNa	14.203	14.2211	14.211	14.2211	14.214	14.2211	14.221	14.2211	3.32924e+07	2.5499e+07	1.69673e+07	3.56731e+07
92	(18:0p/20:2)	M+H	756.59	C43H83O7NP	14.235	14.222	14.235	14.223	14.235	14.23	14.235	14.253	1.24824e+07	3.05266e+07	1.94434e+06	2.59074e+07
93	(18:0/20:3)	M+Na	792.551	C43H80O8NPNa	13.792	13.7947	13.8	13.7947	13.779	13.7947	13.79	13.7947	1.25691e+08	1.07931e+08	1.09894e+08	1.93936e+08
94	(38:3e)	M+H	756.59	C43H83O7NP	16.265	16.2762	16.271	16.2762	16.257	16.2762	16.279	16.2762	1.24869e+07	3.04756e+07	1.94898e+06	2.60668e+07
95	(18:1/20:3)	M+Na	790.536	C43H78O8NPNa	12.474	12.4625	12.47	12.4625	12.472	12.4625	12.466	12.4625	3.12623e+08	2.59048e+08	3.34852e+08	3.11592e+08
96	(20:3e/18:1)	M+Na	776.556	C43H80O7NPNa	13.642	13.6465	13.637	13.6465	13.643	13.6465	13.514	13.6465	1.11944e+07	5.77535e+06	3.48245e+06	5.98223e+06
97	(18:0p/20:4)	M+H	752.559	C43H79O7NP	14.855	14.8607	14.86	14.8607	14.848	14.8607	14.852	14.8607	3.1748e+08	7.03465e+08	8.49385e+07	6.80274e+08
98	(20:3/18:2)	M+Na	788.52	C43H76O8NPNa	11.317	11.3034	11.295	11.3034	11.309	11.3034	11.301	11.3034	4.71277e+08	3.9349e+08	4.10906e+08	3.05851e+08
99	(18:1e/20:4)	M+H	752.559	C43H79O7NP	14.853	14.8723	14.86	14.8723	14.846	14.8723	14.853	14.8723	3.16528e+08	6.9817e+08	8.44938e+07	6.78233e+08
100	(38:5e)	M+H	752.559	C43H79O7NP	14.9059	14.873	14.9059	14.876	14.9059	14.88	14.9059	14.865	1.18779e+07	2.55933e+06	2.87464e+06	3.02648e+06
101	(18:1p/20:4)	M+H	750.543	C43H77O7NP	12.75	12.739	12.779	12.739	12.743	12.739	12.596	12.739	4.52912e+07	8.78087e+07	5.41503e+06	7.92127e+07
102	(18:0p/20:5)	M+H	750.543	C43H77O7NP	13.493	13.5048	13.511	13.5048	13.501	13.5048	13.513	13.5048	4.5569e+08	8.4756e+08	1.61503e+08	8.59718e+08
103	(18:1/20:5)	M+Na	786.504	C43H74O8NPNa	11.752	11.7531	11.774	11.7531	11.743	11.7531	11.754	11.7531	3.05584e+06	2.85865e+06	1.43081e+06	2.70139e+06
104	(38:6e)	M+H	750.543	C43H77O7NP	13.7312	13.729	13.7312	13.748	13.7312	13.713	13.7312	13.734	8.54944e+06	5.44629e+06	8.56756e+06	5.18625e+06
105	(18:1p/20:5)	M+H	748.528	C43H75O7NP	12.509	12.5289	12.53	12.5289	12.508	12.5289	12.544	12.5289	6.2473e+07	1.42924e+08	2.5943e+07	1.26782e+08
106	(16:0p/22:6)	M+H	748.528	C43H75O7NP	13.032	13.0255	13.011	13.0255	13.014	13.0255	13.016	13.0255	1.62528e+08	3.65563e+08	3.56757e+07	323882263
107	(18:2p/20:5)	M+H	746.512	C43H73O7NP	11.407	11.3757	11.366	11.3757	11.52	11.3757	11.375	11.3757	7.50269e+06	1.54071e+07	398078	4.15873e+06
108	(39:1)	M+Na	810.598	C44H86O8NPNa	15.799	15.7736	16.019	15.7736	15.788	15.7736	15.737	15.7736	4.605e+06	3.43777e+06	2.77184e+06	3.24134e+06
109	(17:0/22:6)	M+H	778.538	C44H77O8NP	12.899	12.9016	12.92	12.9016	12.885	12.9016	12.883	12.9016	2.08668e+07	8.50147e+06	1.31834e+07	1.15965e+07
110	(40:0)	M+Na	826.63	C45H90O8NPNa	16.751	16.7782	16.798	16.7782	16.755	16.7782	16.817	16.7782	2.64005e+07	4.03925e+07	1.01876e+07	2.89251e+07
111	(20:2/20:3)	M+Na	816.551	C45H80O8NPNa	12.613	12.6112	12.616	12.6112	12.611	12.6112	12.629	12.6112	1.9897e+07	1.19001e+07	1.39551e+07	7.62074e+06
112	(18:0p/22:5)	M+H	778.575	C45H81O7NP	14.633	14.6343	14.624	14.6343	14.626	14.6343	14.666	14.6343	2.09355e+08	1.5887e+08	2.18683e+08	2.07399e+08
113	(20:3/20:3)	M+Na	814.536	C45H78O8NPNa	11.601	11.5808	11.608	11.5808	11.552	11.5808	11.604	11.5808	1.10582e+07	7.65765e+06	4.35972e+06	2.5721e+06
114	(18:0/22:6)	M+H	792.554	C45H79O8NP	13.792	13.824	13.8	13.824	13.779	13.824	13.79	13.824	1.25691e+08	1.07931e+08	1.09894e+08	1.93936e+08
115	(18:0p/22:6)	M+H	776.559	C45H79O7NP	14.406	14.4073	14.394	14.4073	14.384	14.4073	14.393	14.4073	2.52497e+08	4.71397e+08	9.06312e+07	8.09461e+08
116	(18:3/22:6)	M+H	786.507	C45H73O8NP	10.398	10.3392	10.399	10.3392	10.287	10.3392	10.413	10.3392	9.18172e+07	7.56871e+07	3.71888e+07	3.74861e+07
117	(40:9)	M+Na	808.489	C45H72O8NPNa	10.582	10.3392	10.399	10.3392	10.59	10.3392	10.413	10.3392	5.85336e+06	4.07935e+06	3.3086e+06	2.88746e+06
118	(42:0)	M+Na	854.661	C47H94O8NPNa	17.706	17.696	17.717	17.696	17.709	17.696	17.714	17.696	1.29093e+07	1.98884e+07	6.41969e+06	1.63303e+07
119	(18:0p/24:0)	M+H	816.684	C47H95O7NP	19.455	19.468	19.455	19.468	19.419	19.468	19.431	19.468	1.15785e+07	2.36321e+06	897079	6.92889e+06
120	(42:11)	M+H	810.507	C47H73O8NP	10.003	10.0085	10.01	10.0085	10.006	10.0085	9.979	10.0085	1.60227e+08	1.27393e+08	1.0921e+08	1.02285e+08
121	(18:0p/24:1)	M+H	814.668	C47H93O7NP	18.674	18.7896	18.802	18.7896	18.788	18.7896	18.781	18.7896	1.21721e+07	4.76953e+06	301869	4.45173e+06
122	(18:0p/24:2)	M+H	812.653	C47H91O7NP	18.141	18.1344	18.135	18.1344	18.249	18.1344	18.123	18.1344	1.26475e+06	2.56931e+06	413196	2.14068e+06
123	(42:3e)	M+H	812.653	C47H91O7NP	18.205	18.1484	18.135	18.1484	18.249	18.1484	18.123	18.1484	2.19655e+06	2.55974e+06	488578	2.16814e+06
124	(20:3/22:5)	M+Na	838.536	C47H78O8NPNa	11.508	11.5306	11.511	11.5306	11.518	11.5306	11.519	11.5306	9.39237e+06	8.19211e+06	1.62363e+06	6.35505e+06
125	(20:3/22:6)	M+Na	836.52	C47H76O8NPNa	10.548	10.5537	10.549	10.5537	10.541	10.5537	10.54	10.5537	9.29754e+07	9.15572e+07	6.16459e+07	1.10293e+08
126	(44:0)	M+Na	882.692	C49H98O8NPNa	18.452	18.4547	18.464	18.4547	18.432	18.4547	18.467	18.4547	4.89308e+06	6.20656e+06	2.84907e+06	6.20295e+06
127	(44:12)	M+Na	858.504	C49H74O8NPNa	10.526	10.5553	10.55	10.5553	10.527	10.5553	10.544	10.5553	4.50679e+06	5.15903e+06	3.54841e+06	6.58946e+06
128	(46:3)	M+H	882.695	C51H97O8NP	18.452	18.4552	18.466	18.4552	18.432	18.4552	18.467	18.4552	4.9003e+06	6.54169e+06	2.84599e+06	6.22208e+06
129	(46:4)	M+H	880.679	C51H95O8NP	17.868	17.884	17.892	17.884	17.893	17.884	17.883	17.884	6.10889e+06	1.07574e+07	2.5793e+06	5.53656e+06
130	(18:2/11:2)	M-H	640.398	C34H59O8NP	4.55657	4.559	4.55657	4.309	4.55657	4.547	4.55657	4.55657	2.05477e+06	0	1.31793e+06	0
131	(14:0e/16:0)	M-H	648.497	C35H71O7NP	13.6747	13.658	13.6747	13.668	13.6747	13.667	13.6747	13.66	1.4333e+06	1.1344e+06	1.03164e+06	508620
132	(14:1e/16:0)	M-H	646.482	C35H69O7NP	13.482	13.478	13.482	13.49	13.482	13.499	13.482	13.502	728817	3.03606e+06	68492.6	2.62258e+06
133	(16:1/14:1)	M-H	658.445	C35H65O8NP	10.1075	10.107	10.1075	10.086	10.1075	10.111	10.1075	10.096	14461.4	832229	55469.4	65083.9
134	(30:6)	M-H	650.383	C35H57O8NP	3.893	3.914	3.893	3.77	3.893	3.921	3.893	3.987	16718.5	0	752598	11139.5
135	(31:0e)	M-H	662.513	C36H73O7NP	14.204	14.2084	14.208	14.2084	14.2084	14.2084	14.203	14.2084	3.96947e+07	3.43703e+07	6.834e+07	3.19691e+07
136	(15:0/16:1)	M-H	674.477	C36H69O8NP	12.1155	12.121	12.1155	12.097	12.1155	12.111	12.1155	12.1	88850.2	2.01126e+06	0	45251.8
137	(16:1e/15:0)	M-H	660.497	C36H71O7NP	14.2084	14.193	14.2084	14.211	14.2084	14.099	14.2084	14.219	585013	2.47989e+06	0	1.17594e+06
138	(31:6)	M-H	664.398	C36H59O8NP	4.29516	4.309	4.29516	4.354	4.29516	4.327	4.29516	4.154	1.40635e+06	0	137895	0
139	(31:7)	M-H	662.383	C36H57O8NP	3.35729	3.386	3.35729	3.227	3.35729	3.388	3.35729	3.225	3.04841e+06	0	1.51236e+06	0
140	(16:0/16:0)	M-H	690.508	C37H73O8NP	14.1919	14.196	14.1919	14.204	14.1919	14.19	14.1919	14.208	7.77939e+06	7.81788e+06	1.00101e+07	9.6466e+06
141	(32:0e)	M-H	676.529	C37H75O7NP	14.887	14.8775	14.88	14.8775	14.856	14.8775	14.853	14.8775	4.26086e+07	4.44541e+07	3.77416e+07	1.73571e+07
142	(16:0e/16:0)	M-H	676.529	C37H75O7NP	15.093	15.101	15.093	15.1	15.093	15.143	15.093	15.102	1.1414e+07	8.54443e+06	1.50275e+07	4.30954e+06
143	(32:1e)	M-H	674.513	C37H73O7NP	13.539	13.5509	13.536	13.5509	13.546	13.5509	13.547	13.5509	584553	1.1722e+07	367009	4.22346e+06
144	(16:0e/16:1)	M-H	674.513	C37H73O7NP	13.754	13.803	13.754	13.748	13.754	13.806	13.754	13.617	1.58295e+06	2.26063e+06	1.12171e+06	393038
145	(16:1e/16:0)	M-H	674.513	C37H73O7NP	14.8902	14.895	14.8902	14.879	14.8902	14.896	14.8902	14.887	1.46041e+07	4.61883e+07	1.70362e+06	2.70278e+07
146	(16:1e/16:1)	M-H	672.497	C37H71O7NP	13.5631	13.559	13.5631	13.571	13.5631	13.557	13.5631	13.543	7.60587e+06	3.29483e+07	1.63705e+06	2.3815e+07
147	(14:1e/18:2)	M-H	670.482	C37H69O7NP	12.335	12.325	12.335	12.34	12.335	12.358	12.335	12.327	3.20256e+06	1.02419e+07	775598	1.28126e+07
148	(32:4e)	M-H	668.466	C37H67O7NP	11.231	11.244	11.231	11.215	11.231	11.238	11.231	11.253	328525	862053	145524	869367
149	(16:0/17:0)	M-H	704.524	C38H75O8NP	14.686	14.631	14.686	14.633	14.686	14.63	14.686	14.624	2.3798e+06	1.3465e+06	770513	2.60684e+06
150	(33:0e)	M-H	690.544	C38H77O7NP	15.309	15.3699	15.314	15.3699	15.171	15.3699	15.297	15.3699	1.36256e+08	1.31952e+08	9.54952e+07	5.98028e+07
151	(18:0e/15:0)	M-H	690.544	C38H77O7NP	15.7173	15.719	15.7173	15.694	15.7173	15.723	15.7173	15.702	2.84984e+06	3.21354e+06	1.2823e+06	830743
152	(17:1/16:0)	M-H	702.508	C38H73O8NP	13.5717	13.563	13.5717	13.597	13.5717	13.558	13.5717	13.581	7.88913e+06	9.60999e+06	5.18205e+06	7.05392e+06
153	(16:1e/17:0)	M-H	688.529	C38H75O7NP	15.3699	15.323	15.3699	15.341	15.3699	15.143	15.3699	15.325	3.33698e+06	6.55349e+06	0	2.97987e+06
154	(15:0/18:2)	M-H	700.492	C38H71O8NP	12.2629	12.224	12.2629	12.194	12.2629	12.262	12.2629	12.196	65336.9	937516	48804.8	124263
155	(16:1e/17:1)	M-H	686.513	C38H73O7NP	14.2688	14.269	14.2688	14.266	14.2688	14.273	14.2688	14.256	4.18782e+06	1.98336e+07	584191	1.00868e+07
156	(33:8)	M-H	688.398	C38H59O8NP	3.95172	3.914	3.95172	3.7	3.95172	3.947	3.95172	3.95172	1.83419e+06	0	1.02931e+06	0
157	(18:0/16:0)	M-H	718.539	C39H77O8NP	15.5097	15.518	15.5097	15.52	15.5097	15.522	15.5097	15.502	1.38595e+07	1.71955e+07	1.13521e+07	1.97047e+07
158	(18:0e/16:0)	M-H	704.56	C39H79O7NP	16.34	16.345	16.34	16.347	16.34	16.331	16.34	16.345	1.75205e+07	2.04312e+07	9.63224e+06	1.14355e+07
159	(16:0/18:1)	M-H	716.524	C39H75O8NP	14.261	14.266	14.261	14.263	14.261	14.252	14.261	14.264	1.58344e+08	1.85544e+08	1.82262e+08	2.56387e+08
160	(34:1e)	M-H	702.544	C39H77O7NP	14.914	14.9267	14.932	14.9267	14.909	14.9267	14.935	14.9267	1.49139e+07	1.8368e+07	3.84853e+07	1.67482e+07
161	(16:0e/18:1)	M-H	702.544	C39H77O7NP	15.1317	15.136	15.1317	15.144	15.1317	15.154	15.1317	15.135	2.02287e+07	2.58551e+07	1.32886e+07	1.97428e+07
162	(16:1/18:1)	M-H	714.508	C39H73O8NP	13.114	13.119	13.114	13.125	13.114	13.119	13.114	13.124	2.0364e+08	2.07799e+08	1.71103e+08	2.18391e+08
163	(34:2e)	M-H	700.529	C39H75O7NP	13.795	13.7926	13.8	13.7926	13.785	13.7926	13.791	13.7926	3.09786e+07	3.2671e+07	4.54983e+07	2.2713e+07
164	(16:0e/18:2)	M-H	700.529	C39H75O7NP	14.038	14.032	14.038	14.032	14.038	14.029	14.038	14.036	3.71593e+07	3.0495e+07	2.46035e+07	1.3553e+07
165	(16:1e/18:1)	M-H	700.529	C39H75O7NP	14.387	14.358	14.387	14.344	14.387	14.357	14.387	14.356	1.3867e+06	962784	1.64231e+06	598857
166	(18:1e/16:1)	M-H	700.529	C39H75O7NP	15.3845	15.364	15.3845	15.395	15.3845	15.392	15.3845	15.381	492609	2.90033e+06	90917.5	2.14049e+06
167	(16:0/18:3)	M-H	712.492	C39H71O8NP	12.083	12.071	12.083	12.085	12.083	12.082	12.083	12.083	2.03084e+07	1.58153e+07	7.61139e+06	1.07721e+07
168	(16:0e/18:3)	M-H	698.513	C39H73O7NP	13.0044	13.013	13.0044	12.994	13.0044	12.988	13.0044	13.002	5.40863e+06	4.13549e+06	1.84898e+06	908657
169	(16:1e/18:2)	M-H	698.513	C39H73O7NP	13.8252	13.841	13.8252	13.84	13.8252	13.821	13.8252	13.837	8.53799e+07	3.28694e+08	2.4527e+07	2.36331e+08
170	(16:1/18:3)	M-H	710.477	C39H69O8NP	10.6894	10.684	10.6894	10.669	10.6894	10.693	10.6894	10.702	800534	1.13532e+06	184083	205598
171	(14:0/20:4)	M-H	710.477	C39H69O8NP	11.3359	11.327	11.3359	11.356	11.3359	11.331	11.3359	11.349	1.99851e+06	1.65671e+06	935218	491293
172	(16:2e/18:2)	M-H	696.497	C39H71O7NP	12.4476	12.432	12.4476	12.437	12.4476	12.315	12.4476	12.465	696326	3.0872e+06	103845	3.30951e+06
173	(16:1e/18:3)	M-H	696.497	C39H71O7NP	12.7777	12.798	12.7777	12.79	12.7777	12.746	12.7777	12.77	8.75438e+06	2.79559e+07	951687	1.4825e+07
174	(14:0/20:5)	M-H	708.461	C39H67O8NP	10.3349	10.352	10.3349	10.335	10.3349	10.361	10.3349	10.349	1.93251e+06	1.87417e+06	644082	684088
175	(14:0e/20:5)	M-H	694.482	C39H69O7NP	11.2242	11.229	11.2242	11.215	11.2242	11.218	11.2242	11.213	4.96969e+06	3.41983e+06	3.5568e+06	1.00179e+06
176	(14:1e/20:4)	M-H	694.482	C39H69O7NP	12.0157	12.056	12.0157	12.024	12.0157	12.021	12.0157	12.021	1.34217e+06	5.24352e+06	33361.6	4.06322e+06
177	(14:1e/20:5)	M-H	692.466	C39H67O7NP	10.9892	10.986	10.9892	10.996	10.9892	10.967	10.9892	10.973	5.22063e+06	1.37492e+07	1.24474e+06	1.53574e+07
178	(18:0/17:0)	M-H	732.555	C40H79O8NP	15.9075	15.904	15.9075	15.904	15.9075	15.9	15.9075	15.894	2.18641e+06	2.04187e+06	516483	1.5508e+06
179	(35:0e)	M-H	718.576	C40H81O7NP	16.56	16.5431	16.535	16.5431	16.552	16.5431	16.555	16.5431	7.01469e+07	6.62281e+07	6.14838e+07	5.98752e+07
180	(18:0e/17:0)	M-H	718.576	C40H81O7NP	16.7268	16.717	16.7268	16.78	16.7268	16.719	16.7268	16.735	1.52907e+06	1.39343e+06	416190	767849
181	(35:1)	M-H	730.539	C40H77O8NP	14.249	14.226	14.249	14.262	14.249	14.231	14.249	14.231	972762	2.2549e+06	75531.3	397064
182	(17:0/18:1)	M-H	730.539	C40H77O8NP	14.9437	14.948	14.9437	14.917	14.9437	14.922	14.9437	14.908	1.63649e+07	1.90118e+07	1.46279e+07	1.84312e+07
183	(35:1e)	M-H	716.56	C40H79O7NP	15.567	15.5706	15.554	15.5706	15.568	15.5706	15.573	15.5706	5.64855e+06	5.00641e+06	5.0328e+06	3.58757e+06
184	(18:0e/17:1)	M-H	716.56	C40H79O7NP	15.7779	15.762	15.7779	15.773	15.7779	15.784	15.7779	15.767	4.29592e+06	6.39292e+06	2.32754e+06	2.36864e+06
185	(18:1e/17:0)	M-H	716.56	C40H79O7NP	16.5628	16.547	16.5628	16.564	16.5628	16.571	16.5628	16.571	4.14937e+06	1.2454e+07	35811.5	5.71436e+06
186	(17:0/18:2)	M-H	728.524	C40H75O8NP	13.6141	13.618	13.6141	13.6	13.6141	13.633	13.6141	13.62	5.32421e+06	6.07954e+06	3.00513e+06	5.41491e+06
187	(18:1e/17:1)	M-H	714.544	C40H77O7NP	15.3852	15.34	15.3852	15.357	15.3852	15.384	15.3852	15.375	2.53918e+06	9.45751e+06	271904	7.5144e+06
188	(17:1/18:2)	M-H	726.508	C40H73O8NP	12.6371	12.57	12.6371	12.518	12.6371	12.626	12.6371	12.607	1.85914e+06	2.34072e+06	1.74784e+06	1.40772e+06
189	(15:0/20:4)	M-H	724.492	C40H71O8NP	12.1327	12.151	12.1327	12.164	12.1327	12.121	12.1327	12.151	2.23348e+06	1.91216e+06	310463	928326
190	(15:0/20:5)	M-H	722.477	C40H69O8NP	11.0876	11.093	11.0876	11.088	11.0876	11.085	11.0876	11.074	2.91762e+06	2.55959e+06	1.01502e+06	1.0936e+06
191	(36:0e)	M-H	732.591	C41H83O7NP	17.323	17.2997	17.299	17.2997	17.283	17.2997	17.299	17.2997	1.34262e+07	1.49528e+07	4.34708e+07	2.01535e+07
192	(18:0e/18:0)	M-H	732.591	C41H83O7NP	17.4622	17.452	17.4622	17.476	17.4622	17.45	17.4622	17.433	1.36359e+06	2.29505e+06	774980	907261
193	(18:0/18:1)	M-H	744.555	C41H79O8NP	15.5464	15.572	15.5464	15.58	15.5464	15.542	15.5464	15.57	8.79132e+07	1.03466e+08	1.07936e+08	1.60081e+08
194	(18:0e/18:1)	M-H	730.576	C41H81O7NP	16.3869	16.389	16.3869	16.382	16.3869	16.407	16.3869	16.376	2.34285e+07	2.5941e+07	1.54122e+07	1.72348e+07
195	(18:1e/18:0)	M-H	730.576	C41H81O7NP	17.3146	17.317	17.3146	17.323	17.3146	17.308	17.3146	17.309	2.05101e+06	1.32821e+07	476437	1.092e+07
196	(18:1/18:1)	M-H	742.539	C41H77O8NP	14.3559	14.361	14.3559	14.339	14.3559	14.341	14.3559	14.341	8.09668e+07	9.12713e+07	1.07761e+08	1.25234e+08
197	(36:2e)	M-H	728.56	C41H79O7NP	15.16	15.1449	15.152	15.1449	15.14	15.1449	15.134	15.1449	3.38761e+06	2.80159e+06	5.1533e+06	2.4286e+06
198	(18:0e/18:2)	M-H	728.56	C41H79O7NP	15.3626	15.362	15.3626	15.359	15.3626	15.36	15.3626	15.372	7.32658e+07	8.738e+07	7.39379e+07	7.01416e+07
199	(18:1/18:2)	M-H	740.524	C41H75O8NP	13.1842	13.178	13.1842	13.174	13.1842	13.183	13.1842	13.188	7.82323e+07	9.10582e+07	7.69745e+07	1.09785e+08
200	(18:0/18:3)	M-H	740.524	C41H75O8NP	13.5297	13.518	13.5297	13.542	13.5297	13.506	13.5297	13.527	2.12406e+07	2.37955e+07	6.07506e+06	2.57496e+07
201	(18:1e/18:2)	M-H	726.544	C41H77O7NP	14.194	14.2022	14.17	14.2022	14.15	14.2022	14.222	14.2022	2.09553e+06	2.31809e+06	2.11844e+06	1.71263e+06
202	(18:0e/18:3)	M-H	726.544	C41H77O7NP	14.4043	14.392	14.4043	14.409	14.4043	14.393	14.4043	14.414	9.49996e+06	7.69837e+06	3.42334e+06	2.72756e+06
203	(18:2/18:2)	M-H	738.508	C41H73O8NP	12.024	12.04	12.024	12.025	12.024	12.016	12.024	12.005	4.61666e+07	5.46761e+07	3.16671e+07	3.85098e+07
204	(16:0/20:4)	M-H	738.508	C41H73O8NP	12.8493	12.852	12.8493	12.846	12.8493	12.843	12.8493	12.857	8.79131e+07	9.23632e+07	4.09107e+07	7.98079e+07
205	(16:0e/20:4)	M-H	724.529	C41H75O7NP	13.7509	13.746	13.7509	13.751	13.7509	13.726	13.7509	13.829	3.78119e+07	4.89576e+07	1.69061e+07	2.30343e+07
206	(18:1e/18:3)	M-H	724.529	C41H75O7NP	14.2022	14.216	14.2022	14.192	14.2022	14.187	14.2022	14.206	1.12591e+07	3.61021e+07	1.41086e+06	2.29209e+07
207	(18:3/18:2)	M-H	736.492	C41H71O8NP	10.9905	10.987	10.9905	10.996	10.9905	10.982	10.9905	10.984	9.11627e+06	9.11356e+06	3.35878e+06	3.55065e+06
208	(16:0e/20:5)	M-H	722.513	C41H73O7NP	12.748	12.747	12.748	12.748	12.748	12.739	12.748	12.743	9.83581e+07	9.60943e+07	6.5247e+07	3.18824e+07
209	(16:1e/20:4)	M-H	722.513	C41H73O7NP	13.5085	13.513	13.5085	13.52	13.5085	13.506	13.5085	13.512	6.78343e+07	3.16849e+08	1.09155e+07	1.67688e+08
210	(16:1/20:5)	M-H	734.477	C41H69O8NP	10.4736	10.47	10.4736	10.479	10.4736	10.485	10.4736	10.461	9.11261e+06	1.20102e+07	6.50558e+06	5.54603e+06
211	(14:0/22:6)	M-H	734.477	C41H69O8NP	10.9046	10.893	10.9046	10.897	10.9046	10.932	10.9046	10.916	1.38505e+06	1.49033e+06	1.57806e+06	1.20918e+06
212	(16:2e/20:4)	M-H	720.497	C41H71O7NP	11.9271	11.878	11.9271	11.875	11.9271	11.862	11.9271	12.137	6.29851e+06	4.0832e+06	5.16795e+06	2.05966e+06
213	(16:1e/20:5)	M-H	720.497	C41H71O7NP	12.5058	12.506	12.5058	12.511	12.5058	12.497	12.5058	12.51	1.78619e+08	6.85702e+08	4.01835e+07	4.18535e+08
214	(16:2e/20:5)	M-H	718.482	C41H69O7NP	11.1016	11.1	11.1016	11.088	11.1016	11.108	11.1016	11.085	4.24278e+06	1.37378e+07	1.02351e+06	9.48499e+06
215	(14:1e/22:6)	M-H	718.482	C41H69O7NP	11.6044	11.622	11.6044	11.599	11.6044	11.626	11.6044	11.592	5.81594e+06	1.70663e+07	1.20004e+06	1.95467e+07
216	(19:0/18:1)	M-H	758.571	C42H81O8NP	16.1314	16.116	16.1314	16.157	16.1314	16.115	16.1314	16.118	6.44715e+06	8.27547e+06	5.4501e+06	8.29361e+06
217	(18:1e/19:0)	M-H	744.591	C42H83O7NP	17.6098	17.628	17.6098	17.615	17.6098	17.606	17.6098	17.597	230291	1.44355e+06	6563.54	952791
218	(17:0/20:2)	M-H	756.555	C42H79O8NP	15.0267	15.031	15.0267	15.027	15.0267	15.044	15.0267	15.053	1.12508e+07	9.1077e+06	4.96378e+06	1.16104e+07
219	(18:1e/19:1)	M-H	742.576	C42H81O7NP	16.787	16.922	16.787	16.777	16.787	16.801	16.787	16.798	1.60553e+06	9.71883e+06	292711	7.03153e+06
220	(17:0/20:4)	M-H	752.524	C42H75O8NP	13.559	13.561	13.559	13.558	13.559	13.562	13.559	13.57	3.4868e+07	3.63439e+07	1.2034e+07	2.53144e+07
221	(17:0/20:5)	M-H	750.508	C42H73O8NP	12.4693	12.577	12.4693	12.558	12.4693	12.366	12.4693	12.584	8.14892e+07	7.28858e+07	5.96929e+07	6.10758e+07
222	(17:1/20:5)	M-H	748.492	C42H71O8NP	11.1999	11.175	11.1999	11.214	11.1999	11.195	11.1999	11.19	2.21278e+06	2.82827e+06	1.57384e+06	1.51168e+06
223	(15:0/22:6)	M-H	748.492	C42H71O8NP	11.6588	11.654	11.6588	11.672	11.6588	11.642	11.6588	11.643	1.57521e+07	1.61536e+07	1.62724e+07	1.52711e+07
224	(16:0/22:0)	M-H	774.602	C43H85O8NP	17.7226	17.716	17.7226	17.726	17.7226	17.721	17.7226	17.736	1.31658e+06	2.41285e+06	932780	2.19577e+06
225	(18:0/20:1)	M-H	772.586	C43H83O8NP	16.7403	16.732	16.7403	16.777	16.7403	16.718	16.7403	16.721	1.19311e+07	1.59201e+07	1.41943e+07	1.91793e+07
226	(18:0e/20:1)	M-H	758.607	C43H85O7NP	17.4558	17.582	17.4558	17.465	17.4558	17.479	17.4558	17.405	5.16119e+06	4.88587e+06	3.17528e+06	2.49336e+06
227	(18:1e/20:0)	M-H	758.607	C43H85O7NP	18.2008	18.211	18.2008	18.207	18.2008	18.198	18.2008	18.196	420812	2.39996e+06	29908.9	1.66236e+06
228	(18:0/20:2)	M-H	770.571	C43H81O8NP	15.5813	15.652	15.5813	15.523	15.5813	15.525	15.5813	15.65	2.43527e+07	2.63697e+07	2.75579e+07	3.46828e+07
229	(38:2e)	M-H	756.591	C43H83O7NP	16.265	16.277	16.271	16.277	16.257	16.277	16.279	16.277	1.54703e+06	1.43049e+06	4.99938e+06	2.38117e+06
230	(18:0e/20:2)	M-H	756.591	C43H83O7NP	16.475	16.483	16.475	16.479	16.475	16.471	16.475	16.455	4.13613e+06	3.85882e+06	2.38907e+06	2.31505e+06
231	(18:1e/20:1)	M-H	756.591	C43H83O7NP	17.2767	17.298	17.2767	17.25	17.2767	17.275	17.2767	17.279	2.77841e+06	1.1045e+07	903783	1.14885e+07
232	(18:1/20:2)	M-H	768.555	C43H79O8NP	14.438	14.425	14.438	14.438	14.438	14.43	14.438	14.431	1.96911e+07	1.9032e+07	3.07494e+07	2.30224e+07
233	(18:0e/20:3)	M-H	754.576	C43H81O7NP	15.5466	15.525	15.5466	15.523	15.5466	15.698	15.5466	15.436	3.13915e+06	2.2874e+06	401940	795516
234	(18:1e/20:2)	M-H	754.576	C43H81O7NP	16.277	16.289	16.277	16.304	16.277	16.278	16.277	16.269	4.57872e+06	2.03904e+07	848417	1.92334e+07
235	(16:0/22:4)	M-H	766.539	C43H77O8NP	13.9235	13.877	13.9235	14.031	13.9235	13.929	13.9235	13.932	9.32507e+06	7.03692e+06	3.23606e+06	4.28347e+06
236	(18:0/20:4)	M-H	766.539	C43H77O8NP	14.2511	14.24	14.2511	14.261	14.2511	14.252	14.2511	14.244	2.36247e+08	2.4408e+08	1.33091e+08	3.11795e+08
237	(18:0e/20:4)	M-H	752.56	C43H79O7NP	15.532	15.538	15.429	15.538	15.534	15.538	15.423	15.538	1.19624e+07	4.20986e+07	3.58542e+06	4.74248e+07
238	(18:1e/20:3)	M-H	752.56	C43H79O7NP	15.4415	15.431	15.4415	15.451	15.4415	15.428	15.4415	15.429	2.55559e+06	1.12288e+07	250098	2.44618e+06
239	(18:1/20:4)	M-H	764.524	C43H75O8NP	12.8948	12.887	12.8948	12.926	12.8948	12.887	12.8948	12.898	1.00942e+08	1.21187e+08	6.33376e+07	1.09473e+08
240	(18:0/20:5)	M-H	764.524	C43H75O8NP	13.2907	13.287	13.2907	13.3	13.2907	13.298	13.2907	13.286	4.59529e+08	4.44967e+08	4.0853e+08	5.68339e+08
241	(16:0e/22:5)	M-H	750.544	C43H77O7NP	13.943	13.9497	13.94	13.9497	13.928	13.9497	13.937	13.9497	3.16829e+07	2.13897e+07	1.31672e+07	7.73756e+06
242	(18:0e/20:5)	M-H	750.544	C43H77O7NP	14.1665	14.176	14.1665	14.16	14.1665	14.165	14.1665	14.155	1.10393e+08	8.77936e+07	1.42516e+08	5.98337e+07
243	(16:1e/22:4)	M-H	750.544	C43H77O7NP	14.5059	14.494	14.5059	14.488	14.5059	14.542	14.5059	14.64	4.96195e+06	1.87917e+07	1.00669e+06	9.9564e+06
244	(18:2/20:4)	M-H	762.508	C43H73O8NP	11.359	11.361	11.359	11.38	11.359	11.393	11.359	11.357	3.61161e+06	3.21399e+06	1.21276e+06	867876
245	(16:0/22:6)	M-H	762.508	C43H73O8NP	12.4015	12.392	12.4015	12.388	12.4015	12.374	12.4015	12.39	6.07708e+08	6.10595e+08	7.4555e+08	7.77085e+08
246	(16:0e/22:6)	M-H	748.529	C43H75O7NP	13.2827	13.286	13.2827	13.298	13.2827	13.281	13.2827	13.284	7.86435e+07	6.90118e+07	6.44238e+07	5.14097e+07
247	(18:2e/20:4)	M-H	748.529	C43H75O7NP	13.5344	13.514	13.5344	13.52	13.5344	13.553	13.5344	13.513	1.30158e+07	6.85248e+07	4.0896e+06	4.55178e+07
248	(18:1e/20:5)	M-H	748.529	C43H75O7NP	13.9499	13.926	13.9499	13.934	13.9499	13.923	13.9499	13.962	3.02817e+08	8.61883e+08	1.16001e+08	9.72455e+08
249	(20:5/18:2)	M-H	760.492	C43H71O8NP	10.7467	10.74	10.7467	10.745	10.7467	10.758	10.7467	10.758	2.29638e+08	2.19431e+08	2.14558e+08	1.89024e+08
250	(16:1/22:6)	M-H	760.492	C43H71O8NP	11.0443	11.061	11.0443	11.033	11.0443	11.057	11.0443	11.037	1.33521e+07	1.60913e+07	1.32542e+07	1.09774e+07
251	(18:2e/20:5)	M-H	746.513	C43H73O7NP	12.5324	12.521	12.5324	12.559	12.5324	12.498	12.5324	12.543	2.9052e+07	1.08425e+08	1.23621e+07	9.2976e+07
252	(18:3/20:5)	M-H	758.477	C43H69O8NP	9.74174	9.75	9.74174	9.71	9.74174	9.743	9.74174	9.734	2.53178e+07	1.73393e+07	1.20524e+07	8.62096e+06
253	(18:3e/20:5)	M-H	744.497	C43H71O7NP	11.6161	11.653	11.6161	11.656	11.6161	11.675	11.6161	11.641	7.51925e+06	2.17226e+07	1.79474e+06	2.55235e+07
254	(16:2e/22:6)	M-H	744.497	C43H71O7NP	12.126	12.114	12.126	12.144	12.126	12.307	12.126	12.133	348457	1.38326e+06	44109.5	816698
255	(18:4/20:5)	M-H	756.461	C43H67O8NP	8.97788	8.966	8.97788	8.962	8.97788	8.995	8.97788	8.98	873167	846166	873655	146580
256	(18:1/21:0)	M-H	786.602	C44H85O8NP	17.2823	17.299	17.2823	17.258	17.2823	17.275	17.2823	17.281	2.24229e+06	2.60642e+06	949411	2.41743e+06
257	(18:2/21:0)	M-H	784.586	C44H83O8NP	16.3789	16.386	16.3789	16.374	16.3789	16.385	16.3789	16.366	2.62575e+06	2.02055e+06	814360	3.06584e+06
258	(19:0/20:4)	M-H	780.555	C44H79O8NP	14.8968	14.873	14.8968	14.896	14.8968	14.877	14.8968	14.888	6.68309e+06	5.98964e+06	2.55687e+06	7.05812e+06
259	(17:0/22:5)	M-H	778.539	C44H77O8NP	13.115	13.115	13.115	13.112	13.115	12.887	13.115	13.121	927157	1.885e+06	1.17961e+06	1.39216e+06
260	(19:0/20:5)	M-H	778.539	C44H77O8NP	13.8021	13.785	13.8021	13.788	13.8021	13.774	13.8021	13.796	3.16251e+08	1.99369e+08	2.66788e+08	2.96717e+08
261	(17:1/22:6)	M-H	774.508	C44H73O8NP	11.6995	11.67	11.6995	11.706	11.6995	11.696	11.6995	11.69	5.84877e+06	5.72725e+06	5.02228e+06	5.11561e+06
262	(16:0/24:0)	M-H	802.633	C45H89O8NP	18.5086	18.498	18.5086	18.536	18.5086	18.499	18.5086	18.517	844302	2.04135e+06	786468	1.8012e+06
263	(18:1/22:0)	M-H	800.617	C45H87O8NP	17.7387	17.76	17.7387	17.753	17.7387	17.76	17.7387	17.734	9.09405e+06	1.70121e+07	8.51329e+06	1.66314e+07
264	(20:5/20:5)	M-H	782.477	C45H69O8NP	9.45952	9.473	9.45952	9.473	9.45952	9.449	9.45952	9.458	5.1151e+07	5.36087e+07	4.09632e+07	3.31617e+07
265	(18:1e/22:0)	M-H	786.638	C45H89O7NP	18.8956	18.903	18.8956	18.89	18.8956	18.645	18.8956	18.891	181001	1.03595e+06	0	964268
266	(18:1/22:1)	M-H	798.602	C45H85O8NP	16.6747	16.681	16.6747	16.677	16.6747	16.694	16.6747	16.657	4.87832e+06	9.45972e+06	5.70682e+06	9.41755e+06
267	(22:0/18:2)	M-H	798.602	C45H85O8NP	16.9459	16.954	16.9459	16.945	16.9459	16.945	16.9459	16.936	5.80101e+06	8.26942e+06	3.02941e+06	7.77751e+06
268	(18:1e/22:1)	M-H	784.623	C45H87O7NP	18.1217	18.101	18.1217	18.105	18.1217	18.144	18.1217	18.125	727294	2.21038e+06	136126	3.33202e+06
269	(20:1/20:2)	M-H	796.586	C45H83O8NP	15.6678	15.686	15.6678	15.65	15.6678	15.705	15.6678	15.915	5.55027e+06	6.74215e+06	8.19979e+06	5.57954e+06
270	(18:1/22:2)	M-H	796.586	C45H83O8NP	16.0163	16	16.0163	16.02	16.0163	15.834	16.0163	16.012	1.66924e+07	5.27209e+07	493204	8.23527e+07
271	(40:3e)	M-H	782.607	C45H85O7NP	17.3105	17.32	17.3105	17.328	17.3105	17.131	17.3105	17.32	159928	1.35167e+06	0	1.03161e+06
272	(18:0/22:4)	M-H	794.571	C45H81O8NP	15.147	15.143	15.147	15.164	15.147	15.143	15.147	15.153	1.34242e+06	1.45726e+06	213098	1.2353e+06
273	(20:0/20:4)	M-H	794.571	C45H81O8NP	15.5284	15.534	15.5284	15.535	15.5284	15.525	15.5284	15.528	5.55835e+06	5.4967e+06	2.42448e+06	5.9488e+06
274	(18:0e/22:4)	M-H	780.591	C45H83O7NP	15.9712	15.971	15.9712	15.98	15.9712	15.944	15.9712	15.973	9.93712e+06	8.07807e+06	1.3233e+06	1.43648e+06
275	(18:1/22:4)	M-H	792.555	C45H79O8NP	14.4968	14.492	14.4968	14.488	14.4968	14.499	14.4968	14.483	4.59088e+07	4.01288e+07	3.77659e+07	3.97089e+07
276	(20:0/20:5)	M-H	792.555	C45H79O8NP	14.7495	14.755	14.7495	14.767	14.7495	14.742	14.7495	14.765	6.18233e+06	5.89269e+06	2.5235e+06	8.93305e+06
277	(18:0e/22:5)	M-H	778.576	C45H81O7NP	15.0775	15.07	15.0775	15.068	15.0775	15.079	15.0775	15.07	3.91115e+07	2.67852e+07	1.42292e+07	1.53918e+07
278	(20:0e/20:5)	M-H	778.576	C45H81O7NP	15.5672	15.571	15.5672	15.58	15.5672	15.571	15.5672	15.54	1.4589e+07	1.12584e+07	4.56793e+06	3.59186e+06
279	(20:1e/20:4)	M-H	778.576	C45H81O7NP	16.1259	16.114	16.1259	16.108	16.1259	16.155	16.1259	16.118	615839	1.9118e+06	258610	2.86786e+06
280	(18:1/22:5)	M-H	790.539	C45H77O8NP	12.9328	12.934	12.9328	12.941	12.9328	12.94	12.9328	12.927	1.94177e+07	1.71542e+07	1.02803e+07	1.56481e+07
281	(18:1e/22:5)	M-H	776.56	C45H79O7NP	14.6495	14.656	14.6495	14.655	14.6495	14.645	14.6495	14.643	1.14358e+08	9.31993e+07	1.69073e+08	1.26488e+08
282	(22:5/18:2)	M-H	788.524	C45H75O8NP	11.775	11.721	11.775	11.771	11.775	11.778	11.775	11.786	1.47418e+07	1.4276e+07	8.17254e+06	8.72557e+06
283	(18:1/22:6)	M-H	788.524	C45H75O8NP	12.4778	12.468	12.4778	12.473	12.4778	12.472	12.4778	12.482	2.09069e+08	2.15699e+08	2.83312e+08	2.56723e+08
284	(18:2e/22:5)	M-H	774.544	C45H77O7NP	13.8889	13.892	13.8889	13.87	13.8889	13.905	13.8889	13.908	1.72252e+06	4.77295e+06	1.64891e+06	3.08459e+06
285	(18:1e/22:6)	M-H	774.544	C45H77O7NP	14.4273	14.423	14.4273	14.437	14.4273	14.428	14.4273	14.434	1.2279e+08	4.00238e+08	4.84825e+07	6.80763e+08
286	(18:2/22:6)	M-H	786.508	C45H73O8NP	11.3069	11.328	11.3069	11.317	11.3069	11.307	11.3069	11.324	2.72443e+08	2.69236e+08	3.24048e+08	2.39606e+08
287	(18:2e/22:6)	M-H	772.529	C45H75O7NP	12.132	12.127	12.132	12	12.132	12.002	12.132	12.121	1.62705e+06	2.64394e+06	1.41677e+06	490253
288	(20:3e/20:5)	M-H	772.529	C45H75O7NP	12.7206	12.53	12.7206	12.727	12.7206	12.554	12.7206	12.706	370395	2.01978e+06	627770	1.32662e+06
289	(20:4e/20:5)	M-H	770.513	C45H73O7NP	11.6629	11.667	11.6629	11.654	11.6629	11.676	11.6629	11.642	4.69606e+06	1.0036e+07	2.49766e+06	5.85024e+06
290	(18:1/23:0)	M-H	814.633	C46H89O8NP	18.1601	18.157	18.1601	18.17	18.1601	18.146	18.1601	18.151	1.45689e+06	3.03458e+06	748141	1.9207e+06
291	(18:2/23:0)	M-H	812.617	C46H87O8NP	17.447	17.45	17.447	17.467	17.447	17.421	17.447	17.427	1.17687e+06	1.38874e+06	432032	1.44385e+06
292	(20:4/21:0)	M-H	808.586	C46H83O8NP	16.1352	16.129	16.1352	16.156	16.1352	16.009	16.1352	16.118	1.64197e+06	1.49769e+06	593844	1.19044e+06
293	(26:0/16:0)	M-H	830.664	C47H93O8NP	19.1472	19.147	19.1472	19.154	19.1472	19.15	19.1472	19.129	252594	703181	292847	607245
294	(18:1/24:0)	M-H	828.649	C47H91O8NP	18.5258	18.534	18.5258	18.52	18.5258	18.525	18.5258	18.519	7.02153e+06	1.36429e+07	5.13372e+06	1.21891e+07
295	(20:4/22:6)	M-H	810.508	C47H73O8NP	10.9597	10.987	10.9597	10.997	10.9597	10.966	10.9597	10.973	5.1095e+07	6.09966e+07	2.42564e+07	4.27653e+07
296	(20:5/22:6)	M-H	808.492	C47H71O8NP	10.0085	9.982	10.0085	10.003	10.0085	10.003	10.0085	10.018	1.35928e+08	1.34969e+08	1.21171e+08	1.2307e+08
297	(18:1e/24:0)	M-H	814.67	C47H93O7NP	19.48	19.487	19.48	19.484	19.48	19.367	19.48	19.474	86220	761636	0	706017
298	(18:1/24:1)	M-H	826.633	C47H89O8NP	17.6532	17.668	17.6532	17.655	17.6532	17.656	17.6532	17.649	1.53364e+07	3.25323e+07	1.3867e+07	3.22335e+07
299	(18:1e/24:1)	M-H	812.654	C47H91O7NP	18.8075	18.817	18.8075	18.793	18.8075	18.796	18.8075	18.826	547854	2.74261e+06	80357.3	2.78158e+06
300	(24:1/18:2)	M-H	824.617	C47H87O8NP	16.8134	16.815	16.8134	16.839	16.8134	16.796	16.8134	16.798	1.19253e+07	2.27724e+07	9.25022e+06	1.85597e+07
301	(18:1e/24:2)	M-H	810.638	C47H89O7NP	18.1484	18.154	18.1484	18.14	18.1484	17.92	18.1484	18.154	183191	1.66636e+06	22945.6	1.5566e+06
302	(24:1/18:3)	M-H	822.602	C47H85O8NP	15.796	15.787	15.796	15.785	15.796	15.787	15.796	15.796	6.67988e+06	8.50945e+06	3.60614e+06	7.33636e+06
303	(22:0/20:4)	M-H	822.602	C47H85O8NP	16.714	16.704	16.714	16.722	16.714	16.712	16.714	16.722	1.59784e+06	2.08354e+06	673321	1.64159e+06
304	(20:0/22:6)	M-H	818.571	C47H81O8NP	15.111	15.144	15.111	15.121	15.111	15.097	15.111	15.113	853376	692341	431953	1.45056e+06
305	(20:1/22:6)	M-H	816.555	C47H79O8NP	13.4538	13.444	13.4538	13.446	13.4538	13.448	13.4538	13.469	1.7482e+08	1.18275e+08	7.21406e+07	8.68294e+07
306	(20:1e/22:6)	M-H	802.576	C47H81O7NP	15.7048	15.738	15.7048	15.693	15.7048	15.705	15.7048	15.704	742399	1.79049e+06	353359	3.24433e+06
307	(20:2/22:6)	M-H	814.539	C47H77O8NP	12.6313	12.632	12.6313	12.64	12.6313	12.618	12.6313	12.623	1.52091e+07	1.19497e+07	1.42535e+07	9.44524e+06
308	(20:2e/22:6)	M-H	800.56	C47H79O7NP	14.3882	14.391	14.3882	14.376	14.3882	14.389	14.3882	14.364	287237	1.48206e+06	287247	2.1831e+06
309	(22:5/20:4)	M-H	812.524	C47H75O8NP	11.972	11.991	11.972	11.957	11.972	11.994	11.972	11.972	3.95079e+06	2.9861e+06	1.56605e+06	1.51292e+06
310	(25:1/18:1)	M-H	840.649	C48H91O8NP	18.0671	18.082	18.0671	18.083	18.0671	18.052	18.0671	18.073	690854	1.65508e+06	423766	993550
311	(26:0/18:1)	M-H	856.68	C49H95O8NP	19.1656	19.188	19.1656	19.174	19.1656	19.146	19.1656	19.174	2.50043e+06	3.50679e+06	1.56486e+06	3.12003e+06
312	(22:5/22:6)	M-H	836.524	C49H75O8NP	11.5844	11.606	11.5844	11.598	11.5844	11.593	11.5844	11.592	7.34547e+06	9.83171e+06	2.88996e+06	6.80104e+06
313	(22:6/22:6)	M-H	834.508	C49H73O8NP	10.5553	10.54	10.5553	10.535	10.5553	10.568	10.5553	10.555	5.85706e+07	6.44943e+07	5.45801e+07	8.94063e+07
314	(26:0/18:2)	M-H	854.664	C49H93O8NP	18.4338	18.434	18.4338	18.451	18.4338	18.432	18.4338	18.438	5.86132e+06	1.04014e+07	5.54689e+06	1.28731e+07
315	(26:1/18:2)	M-H	852.649	C49H91O8NP	17.7181	17.712	17.7181	17.753	17.7181	17.723	17.7181	17.716	7.45162e+06	1.2765e+07	5.67602e+06	1.20975e+07
316	(24:1/20:4)	M-H	848.617	C49H87O8NP	16.604	16.729	16.604	16.591	16.604	16.539	16.604	16.61	3.27276e+06	4.56134e+06	2.00858e+06	2.17724e+06
317	(32:0/14:0)	M-H	886.727	C51H101O8NP	18.4103	18.398	18.4103	18.414	18.4103	18.412	18.4103	18.399	325188	517175	1.48266e+06	283776
318	(28:1/18:1)	M-H	882.696	C51H97O8NP	19.0712	19.068	19.0712	19.075	19.0712	19.076	19.0712	19.072	624710	829337	485430	1.02492e+06
319	(47:0)	M-H	900.743	C52H103O8NP	18.617	18.593	18.617	18.608	18.617	18.608	18.617	18.615	470631	615767	950803	262086
320	(34:0/14:0)	M-H	914.758	C53H105O8NP	19.0082	19.023	19.0082	19.027	19.0082	19.026	19.0082	19.001	413952	506738	2.15132e+06	547630
321	(48:1)	M-H	912.743	C53H103O8NP	18.412	18.447	18.412	18.414	18.412	18.417	18.412	18.411	206585	431671	1.02875e+06	234418
322	(49:0)	M-H	928.774	C54H107O8NP	19.188	19.188	19.188	19.182	19.188	19.196	19.188	19.206	500305	539217	910664	292450
323	(50:1)	M-H	940.774	C55H107O8NP	19.018	19.024	19.018	18.975	19.018	19.019	19.018	19.019	360804	456607	1.1306e+06	639765
324	(32:0/18:2)	M-H	938.758	C55H105O8NP	18.4405	18.498	18.4405	18.487	18.4405	18.495	18.4405	18.492	4.2604e+06	6.0837e+06	1.19683e+07	6.32678e+06
325	(33:0/18:2)	M-H	952.774	C56H107O8NP	18.6808	18.698	18.6808	18.715	18.6808	18.695	18.6808	18.677	1.9052e+06	1.7935e+06	1.23156e+06	1.21319e+06
326	(34:0/18:2)	M-H	966.79	C57H109O8NP	19.0812	19.11	19.0812	19.076	19.0812	19.098	19.0812	19.064	5.72789e+06	5.3989e+06	1.42853e+07	1.15577e+07
327	(34:1/18:2)	M-H	964.774	C57H107O8NP	18.5119	18.515	18.5119	18.5	18.5119	18.513	18.5119	18.483	727973	1.29249e+06	2.45241e+06	1.38985e+06
328	(35:0/18:2)	M-H	980.805	C58H111O8NP	19.2499	19.247	19.2499	19.235	19.2499	19.235	19.2499	19.238	2.24493e+06	2.58099e+06	3.36201e+06	4.91969e+06
329	(53:3)	M-H	978.79	C58H109O8NP	18.8206	18.82	18.8206	18.84	18.8206	18.824	18.8206	18.846	823869	889942	1.01553e+06	1.13558e+06
330	(36:0/18:2)	M-H	994.821	C59H113O8NP	19.4864	19.487	19.4864	19.481	19.4864	19.449	19.4864	19.48	88954.3	362957	1.40749e+06	1.00913e+06
331	(54:3)	M-H	992.805	C59H111O8NP	19.087	19.11	19.087	19.072	19.087	19.099	19.087	19.067	448187	537989	853868	733209
332	(34:0/22:6)	M-H	1014.79	C61H109O8NP	18.6923	18.698	18.6923	18.846	18.6923	18.692	18.6923	18.679	357266	579480	1.02902e+06	1.05904e+06
PI
1	(16:0/18:2)	M+Na	857.515	C43H79O13N0PNa	10.406	10.4136	10.452	10.4136	10.419	10.4136	10.427	10.4136	6.44527e+06	332394	3.18409e+06	1.25228e+06
2	(17:0/18:2)	M+Na	871.531	C44H81O13N0PNa	11.135	11.128	11.092	11.128	11.128	11.128	11.139	11.128	3.87372e+06	926424	1.62454e+06	490181
3	(18:0/18:1)	M+Na	887.562	C45H85O13N0PNa	12.807	12.7882	12.7882	12.7882	12.806	12.7882	12.796	12.7882	6.86181e+06	56439.7	2.40885e+06	386516
4	(18:1/18:1)	M+Na	885.546	C45H83O13N0PNa	11.816	11.8314	11.806	11.8314	11.83	11.8314	11.833	11.8314	2.00951e+07	1.84087e+06	1.27967e+07	4.95708e+06
5	(18:0/20:5)	M+Na	907.531	C47H81O13N0PNa	11.862	11.8408	11.805	11.8408	11.828	11.8408	11.819	11.8408	5.59982e+06	343529	4.5975e+06	1.77527e+06
6	(18:1/20:5)	M+NH4	900.56	C47H83O13NP	10.346	10.3799	10.245	10.3799	10.265	10.3799	10.26	10.3799	1.46574e+07	1.42087e+07	1.4642e+07	4.85598e+06
7	(38:6)	M+H	883.533	C47H80O13N0P	10.326	10.3799	10.36	10.3799	10.373	10.3799	10.338	10.3799	5.87368e+06	249882	1.02104e+06	542970
8	(18:3/20:5)	M+NH4	896.528	C47H79O13NP	8.533	8.52417	8.533	8.52417	8.531	8.52417	8.52	8.52417	1.07732e+06	40499.5	1.1845e+06	124404
9	(40:7)	M+NH4	926.575	C49H85O13NP	11.072	11.0739	11.068	11.0739	11.052	11.0739	11.066	11.0739	3.31387e+06	0	1.13679e+06	673515
10	(18:2/22:6)	M+NH4	924.56	C49H83O13NP	10.406	10.415	10.428	10.415	10.381	10.415	10.418	10.415	1.62704e+06	212517	959934	559699
11	(32:0e)	M-H	795.539	C41H80O12N0P	13.7891	13.784	13.7891	13.787	13.7891	13.778	13.7891	13.8	7.57095e+06	6.46345e+06	9.4643e+06	8.26241e+06
12	(32:1)	M-H	807.503	C41H76O13N0P	11.117	11.103	11.117	11.133	11.117	11.12	11.117	11.132	1.44265e+07	2.55316e+06	2.52735e+07	1.0463e+07
13	(33:1)	M-H	821.519	C42H78O13N0P	11.8363	11.834	11.8363	11.829	11.8363	11.845	11.8363	11.844	1.19988e+07	313862	9.41339e+06	2.77339e+06
14	(34:1)	M-H	835.534	C43H80O13N0P	12.5479	12.538	12.5479	12.559	12.5479	12.547	12.5479	12.56	1.28235e+08	1.2007e+07	1.3426e+08	4.90174e+07
15	(16:0/18:1)	M-H	835.534	C43H80O13N0P	14.86	14.886	14.86	14.851	14.86	14.882	14.86	14.868	2.28111e+06	5.26017e+06	1.05597e+06	6.75543e+06
16	(34:2e)	M-H	819.539	C43H80O12N0P	12.7105	12.731	12.7105	12.732	12.7105	12.716	12.7105	12.678	1.78113e+07	1.51436e+07	1.70008e+07	1.50808e+07
17	(18:0e/18:0)	M-H	851.602	C45H88O12N0P	13.561	13.561	13.561	13.555	13.561	13.561	13.561	13.565	2.07548e+07	1.59892e+07	1.04267e+07	8.3814e+06
18	(18:0/18:2)	M-H	861.55	C45H82O13N0P	13.0431	13.057	13.0431	13.011	13.0431	13.027	13.0431	13.061	2.68078e+06	165856	1.21448e+06	241945
19	(18:1/18:2)	M-H	859.534	C45H80O13N0P	11.6765	11.671	11.6765	11.69	11.6765	11.675	11.6765	11.683	6.11707e+06	222147	1.77923e+06	954715
20	(16:0/20:3)	M-H	859.534	C45H80O13N0P	11.9818	11.99	11.9818	11.843	11.9818	11.97	11.9818	11.838	1.55101e+06	0	33289.3	29462.6
21	(16:0/20:4)	M-H	857.519	C45H78O13N0P	11.3842	11.374	11.3842	11.385	11.3842	11.392	11.3842	11.399	4.35784e+07	4.62737e+06	2.00712e+07	1.13334e+07
22	(16:0/20:5)	M-H	855.503	C45H76O13N0P	10.4274	10.427	10.4274	10.442	10.4274	10.432	10.4274	10.45	5.64031e+07	5.87218e+06	3.63218e+07	1.59113e+07
23	(16:0e/20:5)	M-H	841.524	C45H78O12N0P	11.1561	11.142	11.1561	11.152	11.1561	11.14	11.1561	11.102	2.76804e+06	1.06727e+06	955629	492616
24	(17:0/20:4)	M-H	871.534	C46H80O13N0P	12.1043	12.102	12.1043	12.148	12.1043	12.104	12.1043	12.122	1.89155e+07	2.03822e+06	6.08946e+06	2.2666e+06
25	(17:0/20:5)	M-H	869.519	C46H78O13N0P	11.1359	11.141	11.1359	11.136	11.1359	11.135	11.1359	11.135	3.26976e+07	3.40254e+06	1.82282e+07	4.75786e+06
26	(18:0/20:3)	M-H	887.566	C47H84O13N0P	13.388	13.389	13.388	13.427	13.388	13.507	13.388	13.39	2.42471e+06	213406	262706	165393
27	(18:1/20:3)	M-H	885.55	C47H82O13N0P	12.049	12.089	12.049	11.995	12.049	11.986	12.049	11.991	1.49257e+06	25444.3	134595	50368.1
28	(18:0/20:4)	M-H	885.55	C47H82O13N0P	12.8164	12.827	12.8164	12.806	12.8164	12.807	12.8164	12.828	9.60005e+07	1.03067e+07	4.94539e+07	2.20785e+07
29	(18:1/20:4)	M-H	883.534	C47H80O13N0P	11.4716	11.48	11.4716	11.443	11.4716	11.463	11.4716	11.483	3.77537e+07	3.39914e+06	1.80488e+07	1.00135e+07
30	(16:0/22:6)	M-H	881.519	C47H78O13N0P	10.9826	10.986	10.9826	10.996	10.9826	10.984	10.9826	10.982	6.2027e+06	542697	2.94842e+06	1.7907e+06
31	(20:5/18:2)	M-H	879.503	C47H76O13N0P	9.44442	9.44	9.44442	9.443	9.44442	9.451	9.44442	9.458	7.05396e+07	8.28438e+06	5.02699e+07	1.66198e+07
32	(19:0/20:4)	M-H	899.566	C48H84O13N0P	13.4956	13.48	13.4956	13.492	13.4956	13.473	13.4956	13.482	2.30311e+06	138609	674765	353532
33	(19:0/20:5)	M-H	897.55	C48H82O13N0P	12.3608	12.352	12.3608	12.279	12.3608	12.291	12.3608	12.313	1.0324e+06	185159	598317	254655
34	(20:5/20:5)	M-H	901.487	C49H74O13N0P	8.30307	8.308	8.30307	8.314	8.30307	8.303	8.30307	8.306	1.79698e+06	166654	1.45235e+06	259186
35	(18:0/22:5)	M-H	911.566	C49H84O13N0P	12.8122	12.829	12.8122	12.566	12.8122	12.802	12.8122	12.826	2.12828e+06	0	637255	190391
36	(20:2/20:4)	M-H	909.55	C49H82O13N0P	11.6499	11.638	11.6499	11.632	11.6499	11.642	11.6499	11.643	6.84779e+06	429052	3.45096e+06	1.60219e+06
37	(18:0/22:6)	M-H	909.55	C49H82O13N0P	12.4017	12.393	12.4017	12.655	12.4017	12.379	12.4017	12.392	3.98694e+06	54181.8	1.68916e+06	915224
38	(40:6e)	M-H	895.571	C49H84O12N0P	13.475	13.442	13.475	13.444	13.475	13.427	13.475	13.424	3.82489e+06	3.08704e+06	8.71485e+06	7.34712e+06
39	(20:2/20:5)	M-H	907.534	C49H80O13N0P	10.6892	10.692	10.6892	10.669	10.6892	10.685	10.6892	10.687	5.90226e+06	398924	4.16514e+06	804141
40	(18:1/22:6)	M-H	907.534	C49H80O13N0P	11.0739	11.066	11.0739	11.112	11.0739	11.057	11.0739	11.059	5.28495e+06	223380	2.54513e+06	1.53402e+06
41	(20:3/20:5)	M-H	905.519	C49H78O13N0P	9.72003	9.73	9.72003	9.743	9.72003	9.729	9.72003	9.723	2.67684e+06	141741	1.10491e+06	159186
42	(20:5/20:4)	M-H	903.503	C49H76O13N0P	9.1603	9.154	9.1603	9.162	9.1603	9.145	9.1603	9.169	3.44687e+06	344927	1.67462e+06	517601
43	(40:9)	M-H	903.503	C49H76O13N0P	14.86	14.875	14.86	14.882	14.86	14.876	14.86	14.866	774072	1.24663e+06	434105	1.90199e+06
44	(20:4/22:6)	M-H	929.519	C51H78O13N0P	9.68984	9.688	9.68984	9.676	9.68984	9.681	9.68984	9.657	1.07644e+06	30137.9	262740	88025.6
45	(20:5/22:6)	M-H	927.503	C51H76O13N0P	8.80512	8.813	8.80512	8.787	8.80512	8.815	8.80512	8.814	1.2657e+06	59175.2	824563	206567
PG
1	(16:1/20:1)	M+NH4	792.575	C42H83O10NP	12.846	12.8529	12.852	12.8529	12.851	12.8529	12.838	12.8529	1.18613e+09	1.03859e+09	5.54455e+08	5.9604e+08
2	(18:2/18:2)	M+NH4	788.544	C42H79O10NP	10.985	10.8942	10.948	10.8942	10.887	10.8942	10.899	10.8942	5.98101e+06	1.02976e+07	5.59308e+06	3.38697e+06
3	(44:1)	M+H	889.689	C50H98O10N0P	18.061	18.056	17.81	18.056	18.052	18.056	18.066	18.056	6.15245e+06		332865	278597
4	(16:1/14:0)	M-H	691.456	C36H68O10N0P	10.2321	10.229	10.2321	10.258	10.2321	10.275	10.2321	10.302	13329	1.09145e+06	41016.1	71785.4
5	(16:0/16:1)	M-H	719.487	C38H72O10N0P	11.656	11.606	11.656	11.655	11.656	11.643	11.656	11.641	3.66828e+06	4.1619e+07	1.93601e+06	1.18431e+07
6	(16:1/16:1)	M-H	717.471	C38H70O10N0P	10.3358	10.169	10.3358	10.328	10.3358	10.359	10.3358	10.347	1.58e+06	1.06593e+07	444164	1.62852e+06
7	(33:0)	M-H	735.518	C39H76O10N0P	5.352	5.372	5.352	5.375	5.352	5.324	5.352	5.348	7.77548e+06	1.15329e+07	3.48877e+06	5.58206e+06
8	(17:1/16:1)	M-H	731.487	C39H72O10N0P	11.0387	11.154	11.0387	11.031	11.0387	11.0387	11.0387	10.942	12285.9	2.19087e+06	0	30931.1
9	(17:0/17:0)	M-H	749.534	C40H78O10N0P	13.516	13.512	13.516	13.519	13.516	13.522	13.516	13.516	6.5915e+06	3.38395e+07	2.16259e+06	2.19851e+07
10	(17:1/17:0)	M-H	747.518	C40H76O10N0P	12.538	12.52	12.538	12.557	12.538	12.429	12.538	12.543	8.53857e+06	4.08604e+07	2.59409e+06	3.32022e+07
11	(16:0/18:1)	M-H	747.518	C40H76O10N0P	13.041	13.053	13.041	13.029	13.041	13.026	13.041	13.05	3.85587e+07	1.3954e+08	1.29628e+07	1.33098e+08
12	(16:1/18:1)	M-H	745.503	C40H74O10N0P	11.6814	11.67	11.6814	11.69	11.6814	11.675	11.6814	11.642	4.73366e+06	5.40948e+07	1.65318e+06	1.58107e+07
13	(16:0/18:2)	M-H	745.503	C40H74O10N0P	11.932	11.903	11.932	11.92	11.932	11.909	11.932	11.925	2.70947e+06	5.91976e+06	3.25861e+06	4.88848e+06
14	(16:1/18:2)	M-H	743.487	C40H72O10N0P	10.6242	10.771	10.6242	10.642	10.6242	10.635	10.6242	10.686	1.15612e+06	2.54885e+06	577341	4.13796e+06
15	(18:0/17:0)	M-H	763.549	C41H80O10N0P	14.5116	14.527	14.5116	14.523	14.5116	14.535	14.5116	14.513	67654.3	36165.1	55733.1	264104
16	(35:1)	M-H	761.534	C41H78O10N0P	5.3052	5.305	5.3052	5.45	5.3052	5.324	5.3052	5.3	1.51464e+06	1.63939e+06	844122	1.95186e+06
17	(16:0/20:1)	M-H	775.549	C42H80O10N0P	14.4243	14.424	14.4243	14.439	14.4243	14.427	14.4243	14.43	6.42593e+07	2.03972e+08	2.66491e+07	3.4309e+08
18	(16:0/20:2)	M-H	773.534	C42H78O10N0P	13.1791	13.178	13.1791	13.173	13.1791	13.189	13.1791	13.187	2.00151e+07	3.6466e+07	1.39321e+07	4.13145e+07
19	(18:1/18:2)	M-H	771.518	C42H76O10N0P	11.9663	11.933	11.9663	11.959	11.9663	11.994	11.9663	12.007	1.23005e+06	5.70006e+06	1.69921e+06	2.6582e+06
20	(16:0/20:4)	M-H	769.503	C42H74O10N0P	11.6592	11.658	11.6592	11.673	11.6592	11.674	11.6592	11.642	5.39412e+06	8.86525e+06	5.66776e+06	8.88489e+06
21	(18:3/18:2)	M-H	767.487	C42H72O10N0P	9.92283	9.927	9.92283	9.945	9.92283	9.923	9.92283	9.928	499591	1.59055e+06	1.28623e+06	435169
22	(16:0/20:5)	M-H	767.487	C42H72O10N0P	10.7325	10.728	10.7325	10.745	10.7325	10.73	10.7325	10.762	226972	2.06727e+06	407952	882974
23	(16:1/20:5)	M-H	765.471	C42H70O10N0P	9.46828	9.473	9.46828	9.476	9.46828	9.507	9.46828	9.497	1.63045e+06	1.71817e+06	686094	1.70419e+06
24	(37:0)	M-H	791.581	C43H84O10N0P	7.42693	7.479	7.42693	7.439	7.42693	7.42693	7.42693	7.424	601163	662561	0	422241
25	(37:2)	M-H	787.549	C43H80O10N0P	5.296	5.282	5.296	5.246	5.296	5.324	5.296	5.263	308763	134191	133834	656608
26	(18:0/20:2)	M-H	801.565	C44H82O10N0P	14.486	14.479	14.486	14.48	14.486	14.509	14.486	14.47	765564	1.18576e+06	874493	2.93689e+06
27	(20:2/18:2)	M-H	797.534	C44H78O10N0P	12.2245	12.259	12.2245	12.172	12.2245	12.261	12.2245	12.188	6.22921e+06	2.56065e+06	4.18762e+06	2.34019e+06
28	(18:0/20:4)	M-H	797.534	C44H78O10N0P	13.0655	13.057	13.0655	13.06	13.0655	13.094	13.0655	13.046	580412	807934	892539	1.19588e+06
29	(18:1/20:4)	M-H	795.518	C44H76O10N0P	11.6903	11.706	11.6903	11.69	11.6903	11.701	11.6903	11.689	1.01491e+06	2.02487e+06	747879	1.68868e+06
30	(18:0/20:5)	M-H	795.518	C44H76O10N0P	12.1352	12.108	12.1352	12.156	12.1352	12.116	12.1352	12.118	238007	560603	702715	890958
31	(38:5e)	M-H	781.539	C44H78O9N0P	13.087	13.065	13.087	13.081	13.087	13.067	13.087	13.054	1.00392e+06	755625	1.22553e+06	874392
32	(18:1/20:5)	M-H	793.503	C44H74O10N0P	10.7825	10.79	10.7825	10.775	10.7825	10.759	10.7825	10.793	50088.3	1.00914e+06	112466	731311
33	(20:5/18:2)	M-H	791.487	C44H72O10N0P	9.74714	9.721	9.74714	9.751	9.74714	9.741	9.74714	9.717	237626	798810	620424	714111
34	(18:2/22:6)	M-H	817.503	C46H74O10N0P	10.2726	10.261	10.2726	10.274	10.2726	10.257	10.2726	10.28	219415	891674	621916	980361
PS
1	(28:1e)	M+H	664.455	C34H67O9NP	16.137	16.148	16.219	16.148	16.081	16.148	16.146	16.148	1.25922e+06	1.2945e+06	816323	1.26686e+06
2	(16:0/18:1)	M+H	762.528	C40H77O10NP	12.923	12.931	12.897	12.931	12.932	12.931	12.939	12.931	1.83591e+07	3.74266e+06	1.38868e+07	1.0319e+07
3	(18:0/18:1)	M+H	790.559	C42H81O10NP	14.298	14.3029	14.268	14.3029	14.304	14.3029	14.284	14.3029	5.22711e+07	8.77288e+06	3.86705e+07	2.41083e+07
4	(17:0/20:3)	M+Na	822.526	C43H78O10NPNa	11.822	11.795	11.805	11.795	11.789	11.795	11.787	11.795	3.85956e+07	5.93264e+06	2.33768e+07	1.01678e+07
5	(18:0/20:2)	M+Na	838.557	C44H82O10NPNa	12.938	12.9613	12.933	12.9613	12.962	12.9613	12.939	12.9613	1.77346e+07	379254	8.23368e+06	4.15676e+06
6	(18:0/20:3)	M+Na	836.541	C44H80O10NPNa	12.544	12.5519	12.563	12.5519	12.526	12.5519	12.547	12.5519	2.8167e+08	2.58732e+07	2.20791e+08	9.29645e+07
7	(18:1/20:3)	M+Na	834.526	C44H78O10NPNa	11.179	11.1822	11.19	11.1822	11.162	11.1822	11.203	11.1822	1.61512e+07	2.19905e+06	1.47929e+07	3.38639e+06
8	(18:0/20:5)	M+H	810.528	C44H77O10NP	11.97	11.9809	11.987	11.9809	11.964	11.9809	11.966	11.9809	3.74395e+08	4.24468e+07	2.45012e+08	1.22059e+08
9	(18:1/20:5)	M+H	808.512	C44H75O10NP	10.627	10.6324	10.638	10.6324	10.615	10.6324	10.65	10.6324	1.50884e+07	2.19818e+06	1.36262e+07	5.40215e+06
10	(18:0/22:5)	M+H	838.559	C46H81O10NP	12.938	12.9717	12.933	12.9717	12.961	12.9717	12.939	12.9717	1.99092e+07	379254	7.47066e+06	4.05469e+06
11	(42:10)	M+Na	878.494	C48H74O10NPNa	9.812	9.80305	9.812	9.80305	9.804	9.80305	9.799	9.80305	3.2169e+06	399294	691982	461093
12	(42:11)	M+Na	876.479	C48H72O10NPNa	8.909	8.91218	8.936	8.91218	8.899	8.91218	8.902	8.91218	5.0813e+06	524623	1.93607e+06	1.07395e+06
13	(42:8)	M+H	860.544	C48H79O10NP	10.602	10.593	10.602	10.609	10.602	10.615	10.602	10.646	4.92249e+06	69894.7	1.93177e+06	446982
14	(44:12)	M+Na	902.494	C50H74O10NPNa	9.446	9.44337	9.461	9.44337	9.424	9.44337	9.424	9.44337	4.52816e+06	452014	1.74664e+06	875280
15	(18:0/16:0)	M-H	762.529	C40H77O10NP	14.2222	14.213	14.2222	14.222	14.2222	14.253	14.2222	14.38	8.56575e+06	9.30578e+06	4.52545e+06	9.4632e+06
16	(16:0/18:2)	M-H	758.498	C40H73O10NP	11.7769	11.776	11.7769	11.788	11.7769	11.776	11.7769	11.805	6.50135e+06	513051	8.47031e+06	2.905e+06
17	(34:2e)	M-H	744.518	C40H75O9NP	12.559	12.562	12.559	12.603	12.559	12.593	12.559	12.612	1.3059e+06	1.46339e+06	3.83742e+06	1.45087e+06
18	(34:3e)	M-H	742.503	C40H73O9NP	14.897	14.881	14.897	14.913	14.897	14.906	14.897	14.887	614366	1.98354e+06	15798	1.06702e+06
19	(17:0/18:1)	M-H	774.529	C41H77O10NP	13.6462	13.673	13.6462	13.677	13.6462	13.647	13.6462	13.654	6.11075e+06	2.63703e+06	4.27843e+06	1.35375e+06
20	(17:0/18:2)	M-H	772.513	C41H75O10NP	12.5055	12.508	12.5055	12.749	12.5055	12.48	12.5055	12.495	2.40192e+06	581912	2.36026e+06	515244
21	(18:0/18:0)	M-H	790.56	C42H81O10NP	15.4884	15.485	15.4884	15.488	15.4884	15.479	15.4884	15.476	2.16147e+06	1.09011e+06	1.913e+06	1.15105e+06
22	(18:1/18:1)	M-H	786.529	C42H77O10NP	13.0629	13.018	13.0629	13.058	13.0629	13.126	13.0629	13.003	9.28193e+06	174398	9.50282e+06	5.44072e+06
23	(18:0/18:2)	M-H	786.529	C42H77O10NP	13.3805	13.285	13.3805	13.373	13.3805	13.283	13.3805	13.374	3.03578e+06	4.21034e+06	8.60668e+06	3.96897e+06
24	(36:2e)	M-H	772.55	C42H79O9NP	16.339	16.356	16.339	16.344	16.339	16.332	16.339	16.343	1.78464e+06	1.9708e+06	865139	1.16488e+06
25	(18:1/18:2)	M-H	784.513	C42H75O10NP	11.903	11.854	11.903	11.843	11.903	11.986	11.903	11.841	2.58002e+06	1.39451e+06	1.93753e+06	1.06727e+06
26	(18:0/18:3)	M-H	784.513	C42H75O10NP	12.194	12.195	12.194	11.965	12.194	11.986	12.194	12.188	2.63692e+06	283070	2.80896e+06	476342
27	(36:3)	M-H	784.513	C42H75O10NP	14.2831	14.28	14.2831	14.295	14.2831	14.283	14.2831	14.294	6.30765e+06	6.87883e+06	1.00896e+07	9.21608e+06
28	(36:3e)	M-H	770.534	C42H77O9NP	16.1734	16.186	16.1734	16.157	16.1734	16.179	16.1734	16.169	4.92115e+06	1.93741e+07	776595	1.19947e+07
29	(16:0/20:4)	M-H	782.498	C42H73O10NP	11.5852	11.523	11.5852	11.616	11.5852	11.528	11.5852	11.642	1.85823e+07	2.21683e+06	1.30824e+07	8.39421e+06
30	(18:2/18:2)	M-H	782.498	C42H73O10NP	13.1183	13.104	13.1183	13.134	13.1183	13.112	13.1183	13.126	6.32581e+06	6.35039e+06	7.58918e+06	8.67375e+06
31	(36:4e)	M-H	768.518	C42H75O9NP	14.054	14.24	14.054	14.241	14.054	14.247	14.054	14.242	3.38128e+06	3.70795e+06	2.58337e+06	6.07294e+06
32	(16:0/20:5)	M-H	780.482	C42H71O10NP	10.5611	10.541	10.5611	10.557	10.5611	10.567	10.5611	10.555	2.32587e+07	2.70362e+06	2.52261e+07	9.28835e+06
33	(36:5e)	M-H	766.503	C42H73O9NP	13.7928	13.759	13.7928	13.776	13.7928	13.763	13.7928	13.789	294613	2.63029e+06	46052.2	2.10618e+06
34	(19:0/18:1)	M-H	802.56	C43H81O10NP	14.9236	14.896	14.9236	14.858	14.9236	14.833	14.9236	14.866	3.59609e+06	420243	2.21916e+06	1.01314e+06
35	(37:3e)	M-H	784.55	C43H79O9NP	16.5668	16.597	16.5668	16.581	16.5668	16.655	16.5668	16.587	297482	1.07797e+06	9312.01	474249
36	(17:0/20:4)	M-H	796.513	C43H75O10NP	12.2514	12.258	12.2514	12.255	12.2514	12.262	12.2514	12.273	1.7462e+07	2.22256e+06	8.36424e+06	3.53334e+06
37	(17:0/20:5)	M-H	794.498	C43H73O10NP	11.2689	11.269	11.2689	11.255	11.2689	11.277	11.2689	11.256	2.15118e+07	2.41351e+06	1.41813e+07	5.84589e+06
38	(18:0/20:1)	M-H	816.576	C44H83O10NP	15.5421	15.558	15.5421	15.554	15.5421	15.56	15.5421	15.525	5.5945e+06	147646	5.00163e+06	1.84258e+06
39	(38:2e)	M-H	800.581	C44H83O9NP	15.317	15.315	15.317	15.397	15.317	15.306	15.317	15.327	43647.6	38783.5	1.0246e+06	82307.9
40	(38:3)	M-H	812.545	C44H79O10NP	11.423	11.431	11.423	11.493	11.423	11.4	11.423	11.486	2.2596e+06	2.28342e+06	1.68447e+06	2.27366e+06
41	(20:1/18:2)	M-H	812.545	C44H79O10NP	15.5503	15.557	15.5503	15.574	15.5503	15.543	15.5503	15.572	7.88267e+06	8.72318e+06	1.24532e+07	1.61338e+07
42	(38:3e)	M-H	798.565	C44H81O9NP	16.3913	16.363	16.3913	16.383	16.3913	16.392	16.3913	16.373	2.03191e+06	2.40523e+06	1.63415e+06	1.64453e+06
43	(18:0/20:4)	M-H	810.529	C44H77O10NP	12.9659	12.963	12.9659	12.994	12.9659	12.964	12.9659	12.96	2.33855e+08	2.71752e+07	1.72387e+08	8.1736e+07
44	(20:2/18:2)	M-H	810.529	C44H77O10NP	14.3559	14.367	14.3559	14.48	14.3559	14.342	14.3559	14.342	8.02385e+06	5.62687e+06	1.02704e+07	7.93023e+06
45	(38:4e)	M-H	796.55	C44H79O9NP	15.3724	15.363	15.3724	15.375	15.3724	15.378	15.3724	15.372	5.11735e+06	6.17e+06	6.662e+06	5.90998e+06
46	(18:1/20:4)	M-H	808.513	C44H75O10NP	13.1816	13.205	13.1816	13.215	13.1816	13.213	13.1816	13.213	4.0529e+06	2.00568e+06	5.39748e+06	3.67835e+06
47	(38:5e)	M-H	794.534	C44H77O9NP	12.7894	12.781	12.7894	12.733	12.7894	12.772	12.7894	12.784	6.97718e+06	3.20829e+06	6.30666e+06	3.40106e+06
48	(16:0/22:6)	M-H	806.498	C44H73O10NP	11.1194	11.101	11.1194	11.128	11.1194	11.121	11.1194	11.135	3.08664e+07	5.50357e+06	5.05748e+07	2.04152e+07
49	(18:2/20:4)	M-H	806.498	C44H73O10NP	12.864	12.859	12.864	12.864	12.864	12.848	12.864	12.86	1.54918e+06	1.55647e+06	654775	1.47666e+06
50	(38:6e)	M-H	792.518	C44H75O9NP	12.54	12.546	12.54	12.492	12.54	12.562	12.54	12.56	2.28006e+06	1.38872e+06	1.67708e+06	2.62528e+06
51	(20:5/18:2)	M-H	804.482	C44H71O10NP	11.8388	11.861	11.8388	11.84	11.8388	11.845	11.8388	11.843	8.42262e+06	9.4631e+06	7.57377e+06	8.73101e+06
52	(38:8)	M-H	802.466	C44H69O10NP	10.521	10.539	10.521	10.496	10.521	10.562	10.521	10.519	300084	350164	738563	503331
53	(39:1)	M-H	830.592	C45H85O10NP	16.7596	16.745	16.7596	16.822	16.7596	16.779	16.7596	16.816	953460	399191	365001	475502
54	(19:0/20:4)	M-H	824.545	C45H79O10NP	13.6511	13.68	13.6511	13.647	13.6511	13.652	13.6511	13.656	4.82647e+06	362899	2.56407e+06	1.1573e+06
55	(19:0/20:5)	M-H	822.529	C45H77O10NP	12.4809	12.49	12.4809	12.534	12.4809	12.48	12.4809	12.442	3.16889e+06	186673	1.13194e+06	226822
56	(39:6)	M-H	820.513	C45H75O10NP	9.095	9.112	9.095	9.087	9.095	9.127	9.095	9.134	1.0474e+06	722062	1.28584e+06	212592
57	(17:0/22:6)	M-H	820.513	C45H75O10NP	11.8202	11.835	11.8202	11.834	11.8202	11.844	11.8202	11.843	2.56116e+07	3.06109e+06	2.09792e+07	7.94035e+06
58	(18:1/22:0)	M-H	844.607	C46H87O10NP	16.7504	16.746	16.7504	16.589	16.7504	16.75	16.7504	16.726	3.43274e+06	758129	1.93908e+06	1.63027e+06
59	(20:5/20:5)	M-H	826.466	C46H69O10NP	9.743	9.752	9.743	9.737	9.743	9.743	9.743	9.737	1.61127e+06	1.06109e+06	777703	551977
60	(22:0/18:2)	M-H	842.592	C46H85O10NP	15.7659	15.765	15.7659	15.76	15.7659	15.783	15.7659	15.773	2.15714e+06	164858	1.15461e+06	1.00044e+06
61	(40:3)	M-H	840.576	C46H83O10NP	16.766	16.752	16.766	16.776	16.766	16.699	16.766	16.735	1.36723e+06	1.70692e+06	1.84709e+06	2.17513e+06
62	(20:0/20:4)	M-H	838.56	C46H81O10NP	14.3217	14.312	14.3217	14.44	14.3217	14.316	14.3217	14.47	3.23379e+06	1.02967e+06	2.71696e+06	2.01711e+06
63	(20:2/20:2)	M-H	838.56	C46H81O10NP	15.5306	15.527	15.5306	15.666	15.5306	15.485	15.5306	15.65	1.59845e+06	1.49564e+06	2.81542e+06	2.63362e+06
64	(40:4e)	M-H	824.581	C46H83O9NP	17.2607	17.459	17.2607	17.258	17.2607	17.34	17.2607	17.279	396727	1.15162e+06	23197.9	1.26383e+06
65	(40:5e)	M-H	822.565	C46H81O9NP	16.2869	16.272	16.2869	16.301	16.2869	16.292	16.2869	16.271	398071	1.86184e+06	36355.6	1.97797e+06
66	(18:0/22:6)	M-H	834.529	C46H77O10NP	12.5524	12.54	12.5524	12.56	12.5524	12.548	12.5524	12.543	2.58556e+08	2.51854e+07	2.55974e+08	9.72866e+07
67	(40:6)	M-H	834.529	C46H77O10NP	14.2591	14.242	14.2591	14.255	14.2591	14.252	14.2591	14.258	1.11163e+07	9.99748e+06	7.52468e+06	1.3496e+07
68	(40:6e)	M-H	820.55	C46H79O9NP	15.0741	15.068	15.0741	15.101	15.0741	15.08	15.0741	15.071	2.33692e+06	1.88408e+06	2.15268e+06	1.5423e+06
69	(20:2/20:5)	M-H	832.513	C46H75O10NP	10.8247	10.797	10.8247	10.973	10.8247	10.816	10.8247	10.823	2.29903e+06	96118.2	1.50674e+06	303882
70	(18:1/22:6)	M-H	832.513	C46H75O10NP	11.1883	11.173	11.1883	11.189	11.1883	11.193	11.1883	11.191	1.83766e+07	2.11613e+06	2.27518e+07	5.56896e+06
71	(20:3/20:4)	M-H	832.513	C46H75O10NP	12.963	12.966	12.963	12.995	12.963	13.027	12.963	12.951	8.51006e+06	4.91677e+06	7.52378e+06	5.84644e+06
72	(22:5/18:2)	M-H	832.513	C46H75O10NP	13.2971	13.286	13.2971	13.302	13.2971	13.3	13.2971	13.296	1.95604e+07	1.7277e+07	2.14676e+07	2.61739e+07
73	(40:7e)	M-H	818.534	C46H77O9NP	14.8752	14.87	14.8752	14.877	14.8752	14.882	14.8752	14.886	8.92712e+06	2.85975e+07	2.87138e+06	3.23535e+07
74	(20:3/20:5)	M-H	830.498	C46H73O10NP	11.7213	11.707	11.7213	11.71	11.7213	11.717	11.7213	11.709	3.94749e+06	4.22598e+06	2.81603e+06	3.65433e+06
75	(18:2/22:6)	M-H	830.498	C46H73O10NP	12.4102	12.391	12.4102	12.4	12.4102	12.418	12.4102	12.391	1.40535e+07	1.23101e+07	1.73535e+07	1.79748e+07
76	(40:8e)	M-H	816.518	C46H75O9NP	13.9732	13.974	13.9732	13.963	13.9732	13.964	13.9732	13.993	5.9835e+06	1.77721e+07	1.49749e+06	1.84668e+07
77	(20:5/20:4)	M-H	828.482	C46H71O10NP	10.737	10.739	10.737	10.749	10.737	10.761	10.737	10.737	1.27874e+07	1.05769e+07	1.0504e+07	9.69442e+06
78	(41:2)	M-H	856.607	C47H87O10NP	16.782	16.784	16.782	16.799	16.782	16.791	16.782	16.841	445671	33172.4	103438	61090.6
79	(41:3)	M-H	854.592	C47H85O10NP	15.8264	15.822	15.8264	15.845	15.8264	15.81	15.8264	15.803	1.06446e+06	52271.7	317737	206437
80	(19:0/22:6)	M-H	848.545	C47H79O10NP	13.243	13.229	13.243	13.326	13.243	13.234	13.243	13.331	2.80881e+06	565315	1.23147e+06	492604
81	(20:4/22:6)	M-H	854.498	C48H73O10NP	9.80305	9.786	9.80305	9.8	9.80305	9.809	9.80305	9.8	5.43023e+07	7.16616e+06	1.57018e+07	8.79111e+06
82	(20:5/22:6)	M-H	852.482	C48H71O10NP	8.91218	8.91	8.91218	8.919	8.91218	8.913	8.91218	8.917	8.34389e+07	9.46895e+06	4.10604e+07	1.95623e+07
83	(18:1/24:1)	M-H	870.623	C48H89O10NP	16.6179	16.633	16.6179	16.62	16.6179	16.625	16.6179	16.619	6.34707e+06	922976	4.39132e+06	3.49489e+06
84	(18:1/24:2)	M-H	868.607	C48H87O10NP	15.6345	15.639	15.6345	15.652	15.6345	15.628	15.6345	15.617	1.08758e+07	6.26369e+06	8.23257e+06	8.0539e+06
85	(42:3)	M-H	868.607	C48H87O10NP	17.754	17.758	17.754	17.753	17.754	17.723	17.754	17.735	1.31975e+06	2.4689e+06	1.28922e+06	2.35195e+06
86	(22:0/20:4)	M-H	866.592	C48H85O10NP	15.536	15.557	15.536	15.537	15.536	15.567	15.536	15.55	2.00334e+06	215991	1.17772e+06	536852
87	(42:7)	M-H	860.545	C48H79O10NP	11.361	11.375	11.184	11.375	11.385	11.375	11.368	11.375	396784	409103	1.12857e+06	376494
88	(42:7e)	M-H	846.565	C48H81O9NP	15.0564	15.052	15.0564	15.07	15.0564	15.053	15.0564	15.05	2.45625e+06	1.51308e+06	887410	763271
89	(42:8e)	M-H	844.55	C48H79O9NP	15.3583	15.335	15.3583	15.349	15.3583	15.391	15.3583	15.371	1.26362e+06	4.65275e+06	0	2.54818e+06
90	(22:5/20:4)	M-H	856.513	C48H75O10NP	10.7846	10.737	10.7846	10.802	10.7846	10.815	10.7846	10.792	5.25811e+06	1.9534e+06	2.28589e+06	2.13434e+06
91	(42:9e)	M-H	842.534	C48H77O9NP	14.4168	14.422	14.4168	14.415	14.4168	14.43	14.4168	14.407	7.66002e+06	2.09117e+07	3.49762e+06	3.52048e+07
92	(43:5)	M-H	878.592	C49H85O10NP	15.5491	15.539	15.5491	15.557	15.5491	15.591	15.5491	15.538	1.2167e+06	38807.6	407946	188889
93	(43:6)	M-H	876.576	C49H83O10NP	14.6496	14.668	14.6496	14.652	14.6496	14.678	14.6496	14.694	3.80282e+06	1.2313e+06	2.40186e+06	1.09833e+06
94	(22:5/22:6)	M-H	880.513	C50H75O10NP	9.8783	9.871	9.8783	9.895	9.8783	9.89	9.8783	9.907	2.17138e+06	209289	757250	393634
95	(22:6/22:6)	M-H	878.498	C50H73O10NP	9.44337	9.471	9.44337	9.443	9.44337	9.45	9.44337	9.459	7.64972e+07	8.7764e+06	3.52945e+07	1.71067e+07
96	(26:1/18:2)	M-H	896.639	C50H91O10NP	16.8361	16.829	16.8361	16.839	16.8361	16.846	16.8361	16.842	4.51822e+06	3.35079e+06	3.47234e+06	3.39101e+06
97	(24:1/20:4)	M-H	892.607	C50H87O10NP	15.4438	15.444	15.4438	15.397	15.4438	15.539	15.4438	15.419	2.10075e+06	104221	1.45486e+06	1.09316e+06
98	(47:2)	M-H	940.701	C53H99O10NP	17.4794	17.508	17.4794	17.467	17.4794	17.481	17.4794	17.502	2.97594e+07	6.18149e+07	3.13683e+07	4.05118e+07
99	(47:3)	M-H	938.686	C53H97O10NP	16.6051	16.604	16.6051	16.59	16.6051	16.602	16.6051	16.615	1.04499e+07	2.435e+07	8.57686e+06	9.62161e+06
100	(49:2)	M-H	968.733	C55H103O10NP	18.2558	18.268	18.2558	18.249	18.2558	18.249	18.2558	18.268	9.32177e+06	1.58662e+07	1.13365e+07	1.16059e+07
101	(49:3)	M-H	966.717	C55H101O10NP	17.5933	17.585	17.5933	17.577	17.5933	17.599	17.5933	17.6	6.5861e+06	1.23606e+07	5.41408e+06	5.18995e+06
102	(49:5)	M-H	962.686	C55H97O10NP	16.378	16.367	16.378	16.375	16.378	16.363	16.378	16.361	270370	1.05482e+06	333837	264746
LPC
1	(12:0)	M+H	440.277	C20H43O7NP	1.545	1.53265	1.575	1.53265	1.532	1.53265	1.545	1.53265	1.61572e+06	984186	2.64826e+06	737022
2	(13:0)	M+H	454.293	C21H45O7NP	2.339	2.34819	2.366	2.34819	2.332	2.34819	2.308	2.34819	2.14096e+07	2.33481e+06	1.28097e+07	4.13865e+06
3	(14:0)	M+H	468.308	C22H47O7NP	1.997	2.00092	1.968	2.00092	2.005	2.00092	1.982	2.00092	5.67753e+07	5.60138e+06	3.828e+07	1.72847e+07
4	(14:0e)	M+Na	476.311	C22H48O6NPNa	2.552	2.51774	2.471	2.51774	2.526	2.51774	2.536	2.51774	3.88833e+06	1.73217e+06	2.60035e+06	994872
5	(14:1e)	M+H	452.314	C22H47O6NP	2.145	2.39023	2.368	2.39023	2.15	2.39023	2.452	2.39023	426746	1.49827e+06	738414	824040
6	(15:0)	M+H	482.324	C23H49O7NP	2.416	2.41932	2.47	2.41932	2.421	2.41932	2.413	2.41932	8.96333e+07	1.55986e+07	4.44658e+07	2.20526e+07
7	(16:0)	M+Na	518.322	C24H50O7NPNa	3.234	3.22368	3.245	3.22368	3.239	3.22368	3.232	3.22368	1.68627e+08	2.29161e+08	1.56424e+08	9.85995e+07
8	(16:0e)	M+Na	504.342	C24H52O6NPNa	3.869	3.85692	3.87	3.85692	3.86	3.85692	3.867	3.85692	1.76708e+08	3.10951e+08	1.38981e+08	1.32987e+08
9	(16:1e)	M+Na	502.327	C24H50O6NPNa	2.688	2.68242	2.523	2.68242	2.551	2.68242	2.56	2.68242	2.85733e+06	2.39777e+06	1.50474e+06	1.66055e+06
10	(16:2e)	M+H	478.329	C24H49O6NP	2.486	2.562	2.592	2.562	2.528	2.562	2.497	2.562	3.35365e+06	2.01403e+06	2.30938e+06	1.39085e+06
11	(17:0)	M+Na	532.337	C25H52O7NPNa	3.924	3.94466	3.899	3.94466	3.924	3.94466	3.907	3.94466	2.067e+07	4.7934e+07	2.35003e+07	2.74845e+07
12	(18:1)	M+Na	544.337	C26H52O7NPNa	3.41	3.43228	3.421	3.43228	3.396	3.43228	3.448	3.43228	1.29064e+08	2.36412e+08	1.46299e+08	1.63373e+08
13	(18:2)	M+Na	542.322	C26H50O7NPNa	2.337	2.3604	2.463	2.3604	2.349	2.3604	2.369	2.3604	1.20443e+08	4.25359e+07	1.01795e+08	9.74643e+07
14	(18:2e)	M+H	506.361	C26H53O6NP	4.871	4.837	4.884	4.837	4.841	4.837	4.852	4.837	461167	585519	441646	244110
15	(18:3)	M+Na	540.306	C26H48O7NPNa	2.028	1.97911	1.998	1.97911	2.023	1.97911	1.986	1.97911	2.48177e+07	1.81223e+07	8.22492e+06	1.70048e+07
16	(18:3e)	M+H	504.345	C26H51O6NP	3.869	3.86456	3.87	3.86456	3.86	3.86456	3.867	3.86456	1.76708e+08	3.10951e+08	1.38981e+08	1.32987e+08
17	(18:4)	M+Na	538.29	C26H46O7NPNa	1.743	1.68862	1.713	1.68862	1.726	1.68862	1.711	1.68862	849069	972224	778099	448888
18	(19:1)	M+H	536.371	C27H55O7NP	3.863	3.89547	3.853	3.89547	3.847	3.89547	3.849	3.89547	5.87285e+06	3.49757e+06	5.86837e+06	6.86886e+06
19	(20:0)	M+Na	574.384	C28H58O7NPNa	5.252	5.27317	5.265	5.27317	5.278	5.27317	5.267	5.27317	818494	2.51474e+06	2.1809e+06	548072
20	(20:0e)	M+H	538.423	C28H61O6NP	7.803	7.79601	7.796	7.79601	7.8	7.79601	7.776	7.79601	2.22539e+06	3.59432e+06	2.2035e+06	1.85519e+06
21	(20:1)	M+Na	572.369	C28H56O7NPNa	4.61	4.60607	4.589	4.60607	4.591	4.60607	4.608	4.60607	6.74895e+06	1.04393e+07	1.36314e+07	1.97082e+07
22	(20:1e)	M+H	536.407	C28H59O6NP	5.857	5.83638	5.817	5.83638	5.855	5.83638	5.833	5.83638	1.90072e+06	2.71488e+06	2.032e+06	1.37405e+06
23	(20:2e)	M+H	534.392	C28H57O6NP	3.894	3.88628	3.885	3.88628	3.902	3.88628	3.899	3.88628	871338	619476	1.61567e+06	2.27613e+06
24	(20:3e)	M+H	532.376	C28H55O6NP	5.427	5.38426	5.416	5.38426	5.32	5.38426	5.411	5.38426	2.17256e+06	2.02289e+06	2.82346e+06	1.19453e+06
25	(20:4)	M+H	544.34	C28H51O7NP	2.284	2.29106	2.368	2.29106	2.264	2.29106	2.369	2.29106	3.1962e+08	1.52968e+08	2.37288e+08	1.23185e+08
26	(20:4e)	M+H	530.361	C28H53O6NP	3.948	3.94099	3.929	3.94099	3.923	3.94099	3.951	3.94099	1.80759e+06	3.35355e+06	2.67095e+06	2.02035e+06
27	(20:5)	M+Na	564.306	C28H48O7NPNa	1.837	1.88421	1.936	1.88421	1.825	1.88421	1.899	1.88421	9.32295e+07	7.10497e+07	9.73794e+07	8.16065e+07
28	(22:1)	M+Na	600.4	C30H60O7NPNa	6.656	6.648	6.81	6.648	6.655	6.648	6.66	6.648	352834	472406	933108	471023
29	(22:3)	M+H	574.387	C30H57O7NP	5.249	5.255	5.267	5.255	5.277	5.255	5.268	5.255	828765	2.65425e+06	2.1915e+06	601184
30	(22:4)	M+H	572.371	C30H55O7NP	3.074	3.14487	3.219	3.14487	3.072	3.14487	3.082	3.14487	4.71121e+06	1.57719e+06	1.57165e+06	3.60083e+06
31	(22:6)	M+Na	590.322	C30H50O7NPNa	2.161	2.23347	2.251	2.23347	2.165	2.23347	2.258	2.23347	8.87297e+07	6.7789e+07	1.07308e+08	9.06959e+07
32	(26:0)	M+H	636.496	C34H71O7NP	11.88	11.8661	11.864	11.8661	11.845	11.8661	11.883	11.8661	3.60636e+06	5.49565e+06	2.44034e+06	4.19095e+06
33	(28:0)	M+Na	686.51	C36H74O7NPNa	11.674	11.6823	11.668	11.6823	11.671	11.6823	11.661	11.6823	1.95776e+06	972452	2.41929e+06	1.97481e+06
34	(28:1)	M+H	662.512	C36H73O7NP	10.835	10.8233	10.801	10.8233	10.808	10.8233	10.823	10.8233	2.86216e+06	1.83341e+06	3.79621e+06	2.52367e+06
35	(30:0)	M+Na	714.541	C38H78O7NPNa	13.201	13.2214	13.211	13.2214	13.222	13.2214	13.214	13.2214	1.07579e+07	6.9141e+06	1.3333e+07	9.452e+06
36	(31:0)	M+Na	728.556	C39H80O7NPNa	13.705	13.6855	13.693	13.6855	13.692	13.6855	13.678	13.6855	1.62023e+07	1.33946e+07	9.76683e+06	1.11038e+07
37	(32:0)	M+Na	742.572	C40H82O7NPNa	14.637	14.6369	14.633	14.6369	14.649	14.6369	14.638	14.6369	4.3903e+07	4.26132e+07	3.44074e+07	2.30472e+07
38	(32:1)	M+Na	740.556	C40H80O7NPNa	13.283	13.3184	13.315	13.3184	13.322	13.3184	13.332	13.3184	1.93357e+07	1.68012e+07	1.0637e+07	9.91253e+06
39	(33:0)	M+Na	756.588	C41H84O7NPNa	15.319	15.3128	15.31	15.3128	15.31	15.3128	15.297	15.3128	7.07738e+06	5.94385e+06	3.94335e+06	2.1173e+06
40	(34:0)	M+Na	770.603	C42H86O7NPNa	15.9	15.9087	15.9	15.9087	15.916	15.9087	15.92	15.9087	2.76157e+07	2.52049e+07	1.56606e+07	1.47735e+07
41	(34:1)	M+Na	768.588	C42H84O7NPNa	14.725	14.7241	14.71	14.7241	14.707	14.7241	14.715	14.7241	1.50449e+08	127362240	9.68391e+07	7.52109e+07
42	(36:1)	M+Na	796.619	C44H88O7NPNa	15.957	15.97	15.957	15.97	15.981	15.97	15.978	15.97	5.10088e+07	4.47138e+07	2.86737e+07	1.7658e+07
43	(16:1)	M+HCOO	538.315	C25H49O9NP	2.566	2.525	2.566	2.55	2.566	2.527	2.566	2.6	629205	1.87376e+06	2.46229e+06	2.17538e+06
44	(17:1)	M+HCOO	552.331	C26H51O9NP	2.64782	2.811	2.64782	2.817	2.64782	2.871	2.64782	2.821	1.16599e+07	7.65535e+06	1.15252e+07	8.85889e+06
45	(18:0)	M+HCOO	568.362	C27H55O9NP	4.85839	4.875	4.85839	4.882	4.85839	4.899	4.85839	4.868	1.30707e+08	1.60867e+08	1.20175e+08	8.08435e+07
46	(18:0e)	M+HCOO	554.383	C27H57O8NP	5.72034	5.749	5.72034	5.745	5.72034	5.745	5.72034	5.73	2.52275e+07	2.6748e+07	2.48112e+07	1.36764e+07
47	(18:1e)	M+HCOO	552.367	C27H55O8NP	4.02413	4.048	4.02413	4.013	4.02413	4.033	4.02413	4.049	4.592e+06	4.55389e+06	4.23512e+06	2.54079e+06
48	(19:0)	M+HCOO	582.378	C28H57O9NP	5.85436	5.879	5.85436	5.897	5.85436	5.857	5.85436	5.873	5.84573e+06	7.01372e+06	3.18892e+06	2.32374e+06
49	(20:2)	M+HCOO	592.362	C29H55O9NP	3.71556	3.739	3.71556	3.729	3.71556	3.729	3.71556	3.732	1.68494e+07	3.41249e+07	2.38679e+07	2.60433e+07
50	(20:3)	M+HCOO	590.346	C29H53O9NP	2.905	2.873	2.905	2.865	2.905	2.868	2.905	2.892	8.79531e+06	1.24752e+07	4.46987e+06	5.36584e+06
51	(21:0)	M+HCOO	610.409	C30H61O9NP	7.87714	7.884	7.87714	7.879	7.87714	7.891	7.87714	7.883	2.07234e+06	2.37349e+06	966022	882347
52	(22:0)	M+HCOO	624.425	C31H63O9NP	8.6552	8.663	8.6552	8.671	8.6552	8.669	8.6552	8.664	4.28852e+06	4.97498e+06	2.40724e+06	3.18608e+06
53	(22:5)	M+HCOO	614.346	C31H53O9NP	2.89642	2.903	2.89642	2.935	2.89642	2.904	2.89642	2.913	5.65545e+06	8.93664e+06	4.1779e+06	8.0788e+06
54	(23:0)	M+HCOO	638.44	C32H65O9NP	9.45781	9.471	9.45781	9.489	9.45781	9.45	9.45781	9.459	1.41934e+06	1.35813e+06	608730	1.03005e+06
55	(24:0)	M+HCOO	652.456	C33H67O9NP	10.2581	10.259	10.2581	10.27	10.2581	10.272	10.2581	10.274	2.64187e+06	3.88896e+06	1.9596e+06	2.96667e+06
56	(24:1)	M+HCOO	650.44	C33H65O9NP	8.65475	8.676	8.65475	8.671	8.65475	8.669	8.65475	8.686	3.78369e+06	7.3468e+06	3.91152e+06	4.93918e+06
57	(24:2)	M+HCOO	648.425	C33H63O9NP	7.37315	7.386	7.37315	7.383	7.37315	7.388	7.37315	7.399	1.36914e+06	3.14134e+06	1.36715e+06	1.48534e+06
58	(26:1)	M+HCOO	678.472	C35H69O9NP	10.2138	10.217	10.2138	10.212	10.2138	10.219	10.2138	10.215	1.75816e+06	2.90966e+06	1.68831e+06	2.16043e+06
LPE
1	(14:0)	M+H	426.262	C19H41O7NP	2.089	2.08772	2.235	2.08772	2.089	2.08772	2.26	2.08772	7.51365e+06	1.32897e+06	3.66672e+06	140982
2	(15:0)	M+H	440.277	C20H43O7NP									1.43995e+07	1.49163e+06	3.95202e+06	708851
3	(16:0)	M+Na	476.275	C21H44O7NPNa	3.388	3.40143	3.386	3.40143	3.386	3.40143	3.358	3.40143	6.68701e+06	7.00987e+06	3.75731e+06	2.13616e+06
4	(16:0e)	M+Na	462.295	C21H46O6NPNa	4.099	4.102	4.079	4.102	4.074	4.102	4.084	4.102	2.86645e+06	3.26751e+06	1.44955e+06	1.11847e+06
5	(16:1)	M+Na	474.259	C21H42O7NPNa	2.235	2.25634	2.25	2.25634	2.255	2.25634	2.398	2.25634	3.2065e+06	896339	2.19472e+06	126396
6	(16:1e)	M+Na	460.28	C21H44O6NPNa	3.926	3.90725	3.89	3.90725	3.879	3.90725	3.904	3.90725	1.8346e+06	1.50231e+07	1.45683e+06	6.13565e+06
7	(17:0)	M+Na	490.29	C22H46O7NPNa	4.175	4.17314	4.131	4.17314	4.157	4.17314	4.173	4.17314	1.39113e+06	1.52564e+06	287646	397765
8	(17:1)	M+Na	488.275	C22H44O7NPNa	2.728	2.73888	2.913	2.73888	2.746	2.73888	2.742	2.73888	1.53265e+06	55393	1.02523e+06	39742.3
9	(18:0)	M+Na	504.306	C23H48O7NPNa	5.09	5.10466	5.103	5.10466	5.092	5.10466	5.101	5.10466	5.56547e+06	7.65676e+06	2.41734e+06	3.74274e+06
10	(18:0e)	M+Na	490.327	C23H50O6NPNa	6.029	6.03284	6.002	6.03284	6.013	6.03284	6.002	6.03284	1.96122e+06	2.5962e+06	2.21185e+06	1.59312e+06
11	(18:1)	M+Na	502.29	C23H46O7NPNa	3.614	3.62486	3.604	3.62486	3.596	3.62486	3.624	3.62486	7.41377e+06	7.19599e+06	6.62507e+06	4.8182e+06
12	(18:1e)	M+Na	488.311	C23H48O6NPNa	5.842	5.83486	5.831	5.83486	5.841	5.83486	5.843	5.83486	1.95282e+06	1.75679e+07	845540	6.62895e+06
13	(18:2)	M+H	478.293	C23H45O7NP	15.16	15.165	15.171	15.165	15.141	15.165	15.148	15.165	3.99714e+06	1.94162e+06	198442	1.41166e+06
14	(18:2e)	M+Na	486.295	C23H46O6NPNa	4.117	4.09361	4.104	4.09361	4.122	4.09361	4.101	4.09361	181245	2.53522e+06	52928.7	827702
15	(18:3)	M+H	476.277	C23H43O7NP	14.865	14.8739	14.8739	14.8739	14.861	14.8739	14.862	14.8739	3.48434e+06	0	361826	0
16	(19:0)	M+H	496.34	C24H51O7NP	6.14	6.1491	6.124	6.1491	6.14	6.1491	6.136	6.1491	808560	1.02343e+06	226483	396333
17	(20:1)	M+Na	530.322	C25H50O7NPNa	5.278	5.28383	5.275	5.28383	5.295	5.28383	5.293	5.28383	3.13338e+06	1.82746e+06	707574	779182
18	(20:3)	M+Na	526.29	C25H46O7NPNa	2.242	2.26439	2.31	2.26439	2.224	2.26439	2.369	2.26439	9.66074e+08	9.38718e+07	9.3831e+08	156092355
19	(20:4)	M+H	502.293	C25H45O7NP	14.896	14.899	14.877	14.899	14.871	14.899	14.852	14.899	1.15412e+07	3.14069e+06	1.42118e+06	3.22751e+06
20	(20:5)	M+Na	522.259	C25H42O7NPNa	1.959	1.92039	2.021	1.92039	1.907	1.92039	1.988	1.92039	1.04893e+08	7.96098e+06	9.92892e+07	1.30676e+07
21	(22:5)	M+H	528.308	C27H47O7NP	2.24	2.25238	2.233	2.25238	2.257	2.25238	2.369	2.25238	3.62967e+07	3.02483e+06	2.78944e+07	4.26405e+06
22	(22:6)	M+Na	548.275	C27H44O7NPNa	2.211	2.25718	2.368	2.25718	2.216	2.25718	2.369	2.25718	5.3769e+07	9.44171e+06	4.96871e+07	1.43098e+07
23	(18:4)	M-H	472.247	C23H39O7NP	1.70969	1.701	1.70969	1.808	1.70969	1.716	1.70969	1.713	5.3706e+06	183051	3.36868e+06	32125.7
24	(19:1)	M-H	492.31	C24H47O7NP	4.17314	4.149	4.17314	4.179	4.17314	4.072	4.17314	4.297	3.85291e+06	301650	1.22361e+06	121375
25	(20:0)	M-H	508.341	C25H51O7NP	7.25813	7.251	7.25813	7.25	7.25813	7.261	7.25813	7.232	1.01502e+06	1.56676e+06	497091	480634
26	(20:2)	M-H	504.31	C25H47O7NP	3.91502	3.916	3.91502	3.906	3.91502	3.903	3.91502	3.911	9.73452e+06	8.75952e+06	8.34699e+06	6.95781e+06
27	(22:0)	M-H	536.372	C27H55O7NP	8.9106	8.91	8.9106	8.909	8.9106	8.926	8.9106	8.904	842161	798945	389437	578528
28	(22:1)	M-H	534.357	C27H53O7NP	7.361	7.336	7.361	7.337	7.361	7.355	7.361	7.339	916732	663270	1.17953e+06	313925
29	(22:2)	M-H	532.341	C27H51O7NP	5.31293	5.311	5.31293	5.061	5.31293	5.325	5.31293	5.063	1.90021e+06	0	942138	22509.2
30	(22:3)	M-H	530.325	C27H49O7NP	4.09435	4.11	4.09435	4.098	4.09435	4.072	4.09435	4.095	3.07872e+06	55435.8	96247.1	13780.5
31	(22:4)	M-H	528.31	C27H47O7NP	3.26152	3.248	3.26152	3.42	3.26152	3.246	3.26152	3.445	5.16598e+07	96201.6	3.48094e+06	588949
32	(24:1)	M-H	562.388	C29H57O7NP	8.9087	8.91	8.9087	8.919	8.9087	8.896	8.9087	8.918	863374	1.3072e+06	615419	956335
33	(24:2)	M-H	560.372	C29H55O7NP	7.29045	7.287	7.29045	7.331	7.29045	7.308	7.29045	7.251	1.00232e+06	19108.7	691761	4695.41
LPI
1	(18:0)	M+H	601.335	C27H54O12N0P	8.562	8.54351	8.548	8.54351	8.544	8.54351	8.536	8.54351	1.33793e+06	388187	1.39946e+06	233361
2	(16:0)	M-H	571.289	C25H48O12N0P	10.819	10.829	10.819	10.802	10.819	10.807	10.819	10.814	2.13724e+06	0	1.82217e+06	23441.6
3	(18:1)	M-H	597.305	C27H50O12N0P	11.8359	11.854	11.8359	11.837	11.8359	11.845	11.8359	11.845	1.89325e+06	16255.8	1.59588e+06	98254
4	(18:2)	M-H	595.289	C27H48O12N0P	12.3188	12.348	12.3188	12.343	12.3188	12.322	12.3188	12.326	1.14209e+06	4754.35	810794	28980.9
5	(20:4)	M-H	619.289	C29H48O12N0P	14.638	14.6379	14.634	14.6379	14.648	14.6379	14.636	14.6379	1.56887e+07	112668	8.25899e+06	2.20604e+06
6	(20:5)	M-H	617.273	C29H46O12N0P	15.897	15.8973	16.07	15.8973	15.805	15.8973	15.721	15.8973	1.3052e+07	166728	1.22415e+07	2.20511e+06
LPG
1	(16:0)	M-H	483.273	C22H44O9N0P	2.06816	2.06816	2.06816	2.06816	2.057	2.069	2.078	1.815	546968	879712	532970	298563
2	(16:1)	M-H	481.257	C22H42O9N0P	2.2357	2.2357	2.2357	2.2357	2.258	2.219	2.258	2.242	0	1.34267e+06	5692.23	6333.46
3	(18:1)	M-H	509.288	C24H46O9N0P	11.071	11.0715	11.05	11.0715	11.078	11.0715	11.055	11.0715	156218	1.42244e+06	412376	488189
4	(18:2)	M-H	507.273	C24H44O9N0P	8.589	8.61716	8.602	8.61716	8.618	8.61716	8.597	8.61716	295549	1.12345e+06	1.73538e+06	1.25301e+06
5	(20:2)	M-H	535.304	C26H48O9N0P	13.049	13.046	13.013	13.046	13.042	13.046	13.013	13.046	319215	502168	639199	734103
LPS
1	(18:0)	M+H	526.314	C24H49O9NP	10.225	10.248	10.246	10.248	10.227	10.248	10.216	10.248	1.24351e+07	651942	6.82083e+06	1.12261e+06
2	(18:1)	M+Na	546.28	C24H46O9NPNa	7.358	7.335	7.334	7.335	7.328	7.335	7.34	7.335	1.22138e+07	660417	7.39841e+06	2.78266e+06
3	(18:2)	M+Na	544.265	C24H44O9NPNa	9.429	9.42569	9.431	9.42569	9.441	9.42569	9.436	9.42569	1.87794e+07	373294	1.41564e+07	4.14108e+06
4	(20:3)	M+Na	570.28	C26H46O9NPNa	14.234	14.1588	14.276	14.1588	14.213	14.1588	14.267	14.1588	9.68318e+06	562915	8.02553e+06	3.73034e+06
5	(20:5)	M+Na	566.249	C26H42O9NPNa	10.832	10.83	10.833	10.83	10.824	10.83	10.838	10.83	2.33233e+06	4621.97	1.63556e+06	755562
6	(22:6)	M+H	570.283	C28H45O9NP	10.492	10.5031	10.468	10.5031	10.558	10.5031	10.597	10.5031	9.66927e+06	501236	8.5268e+06	3.81175e+06
Cer
1	(d14:1/16:0)	M+H	482.457	C30H60O3N	12.1285	12.139	12.1285	12.136	12.1285	12.125	12.1285	12.122	4.61692e+06	5.00329e+06	3.92459e+06	4.52756e+06
2	(d32:0)	M+H	512.504	C32H66O3N	12.574	12.609	12.577	12.609	12.604	12.609	12.549	12.609	4.64791e+06	1.82901e+06	1.36024e+06	3.88837e+06
3	(d14:0/18:0)	M+H	512.504	C32H66O3N	11.225	11.2223	11.242	11.2223	11.233	11.2223	11.217	11.2223	9.68153e+06	1.61213e+07	2.60228e+07	1.99239e+07
4	(d33:0)	M+H	526.519	C33H68O3N	14.5215	14.491	14.5215	14.484	14.5215	14.501	14.5215	14.478	927416	871782	608230	826604
5	(d15:1/18:0)	M+H	524.504	C33H66O3N	11.5509	11.606	11.5509	11.598	11.5509	11.553	11.5509	11.576	3.6237e+06	54501.3	3.1789e+06	0
6	(d14:1/19:0)	M+H	524.504	C33H66O3N	13.1092	13.178	13.1092	13.172	13.1092	13.184	13.1092	13.188	6.38523e+07	7.55498e+07	5.89996e+07	7.8051e+07
7	(d16:1/18:0)	M+H	538.519	C34H68O3N	10.342	10.352	10.342	10.356	10.342	10.354	10.342	10.349	1.3415e+08	1.52783e+08	2.13885e+08	1.47706e+08
8	(d16:1/18:1)	M+H	536.504	C34H66O3N	9.12398	9.153	9.12398	9.119	9.12398	9.143	9.12398	9.131	4.65185e+06	7.31202e+06	4.98604e+06	4.76532e+06
9	(d16:1/18:3)	M+H	532.472	C34H62O3N	17.016	17.1479	17.194	17.1479	17.1	17.1479	17.172	17.1479	1.49171e+06	1.52627e+06	381571	412662
10	(d17:1/18:0)	M+H	552.535	C35H70O3N	15.9282	15.972	15.9282	15.938	15.9282	15.944	15.9282	15.949	1.17323e+08	1.48111e+08	1.50902e+08	1.60072e+08
11	(d16:1/20:5)	M+H	556.472	C36H62O3N	11.47	11.465	11.439	11.465	11.452	11.465	11.463	11.465	483329	772614	973484	577491
12	(d14:0/24:1)	M+H	594.582	C38H76O3N	12.533	12.5497	12.537	12.5497	12.527	12.5497	12.512	12.5497	3.42334e+07	3.66655e+07	3.7567e+07	3.2672e+07
13	(d14:0/24:2)	M+H	592.566	C38H74O3N	17.991	18.0156	18.035	18.0156	18.005	18.0156	18.005	18.0156	2.38388e+06	4.17706e+06	2.69193e+06	3.29029e+06
14	(d14:1/24:1)	M+H	592.566	C38H74O3N	8.67819	8.713	8.67819	8.672	8.67819	8.7	8.67819	8.697	1.57052e+07	2.23236e+07	1.99367e+07	1.49764e+07
15	(d15:0/24:1)	M+H	608.598	C39H78O3N	15.9146	15.947	15.9146	15.98	15.9146	15.971	15.9146	15.966	1.48746e+07	1.06967e+07	1.20023e+07	6.19353e+06
16	(d16:1/23:1)	M+H	606.582	C39H76O3N	18.2746	18.268	18.2746	18.283	18.2746	18.293	18.2746	18.285	5.74556e+06	5.96458e+06	3.06402e+06	4.46971e+06
17	(d16:1/23:2)	M+H	604.566	C39H74O3N	12.791	12.7518	12.693	12.7518	12.712	12.7518	12.773	12.7518	3.1584e+06	5.14272e+06	2.47349e+06	2.896e+06
18	(d16:0/24:2)	M+H	620.598	C40H78O3N	17.8609	17.854	17.8609	17.815	17.8609	17.854	17.8609	17.752	8.34458e+06	1.52837e+07	9.19786e+06	1.48265e+07
19	(d17:1/23:2)	M+H	618.582	C40H76O3N	18.0682	18.082	18.0682	18.079	18.0682	18.053	18.0682	18.049	2.63856e+07	4.45582e+07	2.01687e+07	4.18067e+07
20	(d17:0/24:1)	M+H	636.629	C41H82O3N	17.389	17.3776	17.408	17.3776	17.386	17.3776	17.4	17.3776	4.50457e+06	7.33757e+06	4.87657e+06	4.32621e+06
21	(d18:1/23:0+O)	M+H	652.624	C41H82O4N	17.737	17.7431	17.726	17.7431	17.73	17.7431	17.72	17.7431	1.39933e+06	2.03694e+06	1.12192e+06	1.41963e+06
22	(d18:1/23:2)	M+H	632.598	C41H78O3N	17.511	17.37	17.358	17.37	17.48	17.37	17.502	17.37	7.07332e+06	3.39766e+07	2.22616e+06	3.44729e+06
23	(d18:1/24:0+O)	M+H	666.639	C42H84O4N	18.173	18.182	18.185	18.182	18.162	18.182	18.163	18.182	1.04191e+06	903599	1.09794e+06	1.21672e+06
24	(d18:1/24:1)	M+H	648.629	C42H82O3N	18.508	18.533	18.508	18.495	18.508	18.521	18.508	18.547	1.32815e+07	1.94158e+07	3.43735e+07	3.74059e+07
25	(d18:1/25:0)	M+H	664.66	C43H86O3N	18.859	18.8648	18.857	18.8648	18.869	18.8648	18.862	18.8648	1.54834e+06	2.10139e+06	2.84763e+06	3.63927e+06
26	(d20:0/24:1)	M+H	678.676	C44H88O3N	18.674	18.6834	18.684	18.6834	18.676	18.6834	18.658	18.6834	801512	1.69413e+06	498305	1.01166e+06
27	(m17:1/24:0+O)	M+H	636.629	C41H82O3N	17.389	17.399	17.408	17.399	17.386	17.399	17.4	17.399	4.50457e+06	7.33757e+06	4.87657e+06	4.32621e+06
28	(m18:1/24:0+O)	M+H	650.645	C42H84O3N	17.895	17.8896	17.873	17.8896	17.873	17.8896	17.871	17.8896	1.03574e+07	2.6476e+07	1.3702e+07	1.62589e+07
29	(m20:1/24:0+O)	M+H	678.676	C44H88O3N	18.674	18.6682	18.684	18.6682	18.676	18.6682	18.658	18.6682	801512	1.69413e+06	498305	1.01166e+06
30	(t18:0/24:0)	M+H	668.655	C42H86O4N	18.041	18.0472	18.047	18.0472	18.047	18.0472	18.029	18.0472	1.74917e+06	1.33732e+06	494012	1.49213e+06
31	(d14:1/14:0)	M+HCOO	498.416	C29H56O5N	11.242	11.245	11.242	11.252	11.242	11.237	11.242	11.254	544319	752688	377735	285664
32	(d30:0)	M+HCOO	528.463	C31H62O5N	14.01	14.1932	14.028	14.1932	13.997	14.1932	14.003	14.1932	162220	1.56928e+06	3.94059e+06	1.62805e+06
33	(d14:1/16:1)	M+HCOO	524.432	C31H58O5N	13.3079	13.331	13.3079	13.325	13.3079	13.316	13.3079	13.346	1.48881e+06	1.72321e+06	776603	802675
34	(d31:0)	M+HCOO	542.479	C32H64O5N	12.064	12.0776	12.075	12.0776	12.072	12.0776	12.082	12.0776	261094	1.12427e+06	1.80991e+06	1.11583e+06
35	(d15:1/16:0)	M+HCOO	540.463	C32H62O5N	8.802	8.82115	8.799	8.82115	8.819	8.82115	8.818	8.82115	1.09869e+07	1.56163e+07	1.81848e+07	1.85766e+07
36	(d32:0+O)	M+HCOO	572.49	C33H66O6N	12.724	12.7226	12.722	12.7226	12.708	12.7226	12.719	12.7226	4.32688e+06	6.06738e+06	6.88324e+06	8.71235e+06
37	(d12:0/20:1)	M+HCOO	554.479	C33H64O5N	11.8085	11.779	11.8085	11.77	11.8085	11.791	11.8085	11.788	48320.3	633843	1.8154e+07	3.77003e+06
38	(d14:1/18:0)	M+HCOO	554.479	C33H64O5N	14.3041	14.325	14.3041	14.295	14.3041	14.286	14.3041	14.319	2.4797e+08	3.30949e+08	3.96029e+08	4.38177e+08
39	(d14:1/18:0+O)	M+HCOO	570.474	C33H64O6N	14.405	14.435	14.425	14.435	14.4	14.435	14.416	14.435	2.83053e+06	3.62291e+06	4.61774e+06	4.10219e+06
40	(d14:1/18:1)	M+HCOO	552.463	C33H62O5N	11.3168	11.328	11.3168	11.314	11.3168	11.305	11.3168	11.324	1.23218e+07	1.77757e+07	8.31288e+06	1.44747e+07
41	(d14:2/18:0)	M+HCOO	552.463	C33H62O5N	12.175	12.1562	12.148	12.1562	12.166	12.1562	12.157	12.1562	1.62157e+06	1.46012e+06	1.48749e+06	1.71565e+06
42	(d14:1/18:2)	M+HCOO	550.448	C33H60O5N	10.7794	10.753	10.7794	10.765	10.7794	10.779	10.7794	10.786	9.4636e+06	1.10169e+07	4.74143e+06	7.674e+06
43	(d12:0/20:4)	M+HCOO	548.432	C33H58O5N	10.833	10.8184	10.802	10.8184	10.822	10.8184	10.837	10.8184	2.06275e+06	3.44319e+06	680753	1.22637e+06
44	(d14:0/19:0)	M+HCOO	570.51	C34H68O5N	13.282	13.28	13.28	13.28	13.27	13.28	13.284	13.28	8.44138e+06	1.48722e+07	1.29406e+07	1.23963e+07
45	(d33:0+O)	M+HCOO	586.505	C34H68O6N	10.8184	10.831	10.8184	10.819	10.8184	10.824	10.8184	10.828	1.37875e+06	1.74319e+06	873853	1.26389e+06
46	(d12:0/21:1)	M+HCOO	568.495	C34H66O5N	9.99868	9.982	9.99868	10	9.99868	9.988	9.99868	10.017	19788.9	139502	1.68888e+06	843635
47	(d15:1/18:1)	M+HCOO	566.479	C34H64O5N	15.117	15.1203	15.114	15.1203	15.113	15.1203	15.091	15.1203	4.11925e+06	6.64988e+06	1.90578e+06	3.01401e+06
48	(d14:2/19:0)	M+HCOO	566.479	C34H64O5N	17.766	17.7612	17.76	17.7612	17.682	17.7612	17.756	17.7612	199106	638598	1.73975e+06	1.32445e+06
49	(d15:1/18:2)	M+HCOO	564.463	C34H62O5N	17.992	17.8588	17.661	17.8588	17.682	17.8588	17.871	17.8588	1.73783e+06	2.63065e+06	524878	1.08395e+06
50	(d16:0/18:0)	M+HCOO	584.526	C35H70O5N	9.986	10.007	9.99	10.007	9.994	10.007	9.979	10.007	2.7708e+07	7.55337e+07	1.21218e+08	9.03013e+07
51	(d12:0/22:1)	M+HCOO	582.51	C35H68O5N	13.5883	13.603	13.5883	13.597	13.5883	13.616	13.5883	13.619	671590	149736	4.20724e+06	1.3568e+06
52	(d16:1/18:0+O)	M+HCOO	598.505	C35H68O6N	14.5854	14.608	14.5854	14.587	14.5854	14.581	14.5854	14.615	1.57504e+06	2.35358e+06	2.01994e+06	1.80118e+06
53	(d14:1/20:0+O)	M+HCOO	598.505	C35H68O6N	15.1203	15.139	15.1203	15.145	15.1203	15.15	15.1203	15.137	1.03883e+06	1.97075e+06	3.79718e+06	1.32412e+06
54	(d14:2/20:0)	M+HCOO	580.495	C35H66O5N	13.8769	13.87	13.8769	13.881	13.8769	13.884	13.8769	13.885	943072	1.45421e+06	6.1522e+06	5.19696e+06
55	(d16:2/18:0)	M+HCOO	580.495	C35H66O5N	14.2816	14.234	14.2816	14.262	14.2816	14.272	14.2816	14.207	1.77629e+06	2.5474e+06	2.73774e+06	3.25987e+06
56	(d16:1/18:2)	M+HCOO	578.479	C35H64O5N	11.947	11.9567	11.94	11.9567	11.978	11.9567	11.955	11.9567	1.27004e+07	2.18654e+07	9.68003e+06	1.1019e+07
57	(d14:2/20:1)	M+HCOO	578.479	C35H64O5N	13	12.9819	12.987	12.9819	12.961	12.9819	12.968	12.9819	338650	729353	2.03168e+06	811905
58	(d34:3)	M+HCOO	578.479	C35H64O5N	14.473	14.4695	14.475	14.4695	14.461	14.4695	14.437	14.4695	5956.93	122881	1.0369e+06	580185
59	(d14:1/20:5)	M+HCOO	572.432	C35H58O5N	12.7226	12.744	12.7226	12.732	12.7226	12.738	12.7226	12.74	2.18768e+06	3.8387e+06	3.17855e+06	4.34028e+06
60	(d14:0/21:0)	M+HCOO	598.542	C36H72O5N	18.527	18.501	18.418	18.501	18.295	18.501	18.503	18.501	2.29352e+07	3.18969e+07	3.05692e+07	3.30053e+07
61	(d35:1+O)	M+HCOO	612.521	C36H70O6N	15.117	15.1135	15.114	15.1135	15.113	15.1135	15.091	15.1135	586017	506530	1.0139e+06	142412
62	(d17:1/18:1)	M+HCOO	594.51	C36H68O5N	13.059	13.0504	13.056	13.0504	13.051	13.0504	13.056	13.0504	2.21927e+06	4.33907e+06	4.50754e+06	3.26779e+06
63	(d15:1/20:1)	M+HCOO	594.51	C36H68O5N	14.55	14.7941	14.579	14.7941	14.802	14.7941	14.566	14.7941	1.50052e+06	2.00549e+06	7.89896e+06	6.31886e+06
64	(d17:1/18:2)	M+HCOO	592.495	C36H66O5N	10.913	10.9217	10.948	10.9217	10.889	10.9217	10.901	10.9217	1.01055e+06	2.10521e+06	733556	1.85196e+06
65	(d14:0/22:0)	M+HCOO	612.557	C37H74O5N	12.4018	12.392	12.4018	12.4	12.4018	12.418	12.4018	12.391	9.86289e+07	171489025	1.20547e+08	1.56229e+08
66	(d36:0)	M+HCOO	612.557	C37H74O5N	8.692	8.67819	8.68	8.67819	8.688	8.67819	8.674	8.67819	2.994e+06	3.9774e+06	3.23075e+06	3.11365e+06
67	(d36:1)	M+HCOO	610.542	C37H72O5N	14.788	14.7757	14.803	14.7757	14.79	14.7757	14.786	14.7757	878023	3.78343e+06	2.9282e+06	2.14261e+06
68	(d14:1/22:0)	M+HCOO	610.542	C37H72O5N	16.647	16.662	16.654	16.662	16.64	16.662	16.619	16.662	4.15376e+08	5.67881e+08	5.96335e+08	4.97021e+08
69	(d14:1/22:0+O)	M+HCOO	626.537	C37H72O6N	15.8051	15.82	15.8051	15.801	15.8051	15.798	15.8051	15.797	5.36353e+06	5.94981e+06	6.94211e+06	3.70239e+06
70	(d14:1/22:1)	M+HCOO	608.526	C37H70O5N	13.028	13.0307	13.027	13.0307	13.033	13.0307	13.016	13.0307	4.56757e+06	8.26725e+06	1.41742e+07	6.63353e+06
71	(d14:2/22:0)	M+HCOO	608.526	C37H70O5N	12.8116	12.801	12.8116	12.806	12.8116	12.808	12.8116	12.806	1.79909e+06	1.74635e+06	1.89462e+06	2.35094e+06
72	(d18:1/18:2)	M+HCOO	606.51	C37H68O5N	12.461	12.469	12.461	12.475	12.461	12.472	12.461	12.465	800644	1.54839e+06	1.52897e+06	2.86104e+06
73	(d14:1/22:6)	M+HCOO	598.448	C37H60O5N	10.1314	10.136	10.1314	10.133	10.1314	10.144	10.1314	10.141	2.43379e+06	2.97854e+06	2.09056e+06	4.24483e+06
74	(d14:0/23:0)	M+HCOO	626.573	C38H76O5N	12.3091	12.324	12.3091	12.31	12.3091	12.325	12.3091	12.328	3.06718e+07	4.2532e+07	1.8384e+07	3.00329e+07
75	(d37:1)	M+HCOO	624.557	C38H74O5N	10.0027	9.995	10.0027	9.999	10.0027	9.987	10.0027	9.999	2.71325e+06	5.09112e+06	1.86773e+06	2.47285e+06
76	(d14:1/23:0)	M-H	578.552	C37H72O3N	14.7403	14.736	14.7403	14.751	14.7403	14.756	14.7403	14.724	5.8423e+06	7.27236e+06	5.00128e+06	5.55719e+06
77	(d37:1+O)	M+HCOO	640.552	C38H74O6N	10.1255	10.133	10.1255	10.132	10.1255	10.142	10.1255	10.136	5.63437e+06	5.56876e+06	3.06553e+06	2.5696e+06
78	(d14:1/23:1)	M+HCOO	622.542	C38H72O5N	14.866	14.8643	14.87	14.8643	14.87	14.8643	14.854	14.8643	2.30394e+06	2.36171e+06	2.7774e+06	1.75461e+06
79	(d14:2/23:0)	M+HCOO	622.542	C38H72O5N	17.181	17.156	17.194	17.156	17.197	17.156	17.172	17.156	753556	1.19062e+06	1.90452e+06	904076
80	(d16:0/22:0)	M+HCOO	640.589	C39H78O5N	17.1561	17.156	17.1561	17.167	17.1561	17.168	17.1561	17.153	7.45623e+07	1.33025e+08	6.93301e+07	1.35964e+08
81	(d16:1/22:0)	M+HCOO	638.573	C39H76O5N	17.914	17.9054	17.895	17.9054	17.894	17.9054	17.899	17.9054	2.83151e+08	2.94803e+08	2.61679e+08	2.54205e+08
82	(d16:1/22:0+O)	M-H	608.562	C38H74O4N	9.42071	9.425	9.42071	9.405	9.42071	9.449	9.42071	9.445	4.33133e+06	5.30265e+06	1.81849e+06	2.41901e+06
83	(d12:0/26:2)	M+HCOO	636.557	C39H74O5N	13.869	13.868	13.869	13.884	13.869	13.854	13.869	13.885	3.12335e+06	3.21192e+06	3.56325e+06	2.38608e+06
84	(d14:2/24:0)	M+HCOO	636.557	C39H74O5N	14.3718	14.384	14.3718	14.39	14.3718	14.387	14.3718	14.381	2.07841e+06	2.49343e+06	1.57436e+06	2.50397e+06
85	(d38:2+O)	M+HCOO	652.552	C39H74O6N	13.6908	13.695	13.6908	13.692	13.6908	13.712	13.6908	13.683	2.68654e+06	3.35174e+06	1.8072e+06	1.92506e+06
86	(d14:1/24:2)	M+HCOO	634.542	C39H72O5N	13.867	13.865	13.838	13.865	13.864	13.865	13.898	13.865	2.0579e+06	3.68507e+06	2.81888e+06	3.30419e+06
87	(d16:1/22:6)	M+HCOO	626.479	C39H64O5N	15.737	15.7411	15.738	15.7411	15.805	15.7411	15.803	15.7411	2.42126e+06	3.55679e+06	2.77541e+06	4.10618e+06
88	(d16:0/23:0)	M+HCOO	654.604	C40H80O5N	19.424	19.3666	19.384	19.3666	19.36	19.3666	19.36	19.3666	1.58932e+07	2.56699e+07	1.41427e+07	1.74543e+07
89	(d16:1/23:0)	M+HCOO	652.589	C40H78O5N	18.5567	18.592	18.5567	18.571	18.5567	18.562	18.5567	18.552	1.65153e+08	1.88997e+08	1.39201e+08	1.41706e+08
90	(d16:1/23:0+O)	M+HCOO	668.583	C40H78O6N	16.5549	16.565	16.5549	16.581	16.5549	16.57	16.5549	16.577	1.34555e+07	1.4221e+07	6.69409e+06	7.58266e+06
91	(d39:2)	M+HCOO	650.573	C40H76O5N	17.99	17.9909	17.989	17.9909	18.005	17.9909	17.993	17.9909	1.23821e+06	1.74013e+06	293965	972278
92	(d15:1/24:1)	M+HCOO	650.573	C40H76O5N	18.2027	18.212	18.2027	18.207	18.2027	18.204	18.2027	18.212	1.13919e+07	2.11562e+07	1.59228e+07	1.36613e+07
93	(d16:0/24:0)	M+HCOO	668.62	C41H82O5N	17.974	17.993	17.974	17.984	17.974	18.005	17.974	17.979	2.52967e+07	5.08231e+07	2.34451e+07	4.02248e+07
94	(d16:0/24:1)	M+HCOO	666.604	C41H80O5N	16.8703	16.883	16.8703	16.854	16.8703	16.873	16.8703	16.899	2.91202e+07	6.49018e+07	3.98559e+07	6.46251e+07
95	(d16:1/24:0)	M+HCOO	666.604	C41H80O5N	17.6551	17.694	17.6551	17.674	17.6551	17.672	17.6551	17.682	1.41529e+08	1.32962e+08	1.21939e+08	1.47522e+08
96	(d16:1/24:0+O)	M+HCOO	682.599	C41H80O6N	17.2576	17.249	17.2576	17.251	17.2576	17.28	17.2576	17.258	1.87269e+07	2.17485e+07	9.16898e+06	1.36318e+07
97	(d40:1+O)	M-H	636.594	C40H78O4N	17.57	17.5754	17.575	17.5754	17.576	17.5754	17.587		2.2419e+06	2.66263e+06	1.12759e+06	1.66651e+06
98	(d40:2)	M+HCOO	664.589	C41H78O5N	15.7646	15.755	15.7646	15.785	15.7646	15.784	15.7646	15.771	8.51988e+06	1.72458e+07	1.08704e+07	1.62714e+07
99	(d14:0/26:2)	M+HCOO	664.589	C41H78O5N	16.0851	16.072	16.0851	16.074	16.0851	16.053	16.0851	16.082	272621	1.38319e+06	530015	704197
100	(d16:1/24:1)	M+HCOO	664.589	C41H78O5N	16.4609	16.483	16.4609	16.461	16.4609	16.468	16.4609	16.456	5.79387e+07	6.3137e+07	8.69751e+07	7.41003e+07
101	(d40:2+O)	M+HCOO	680.583	C41H78O6N	16.008	15.997	16.008	15.978	16.008	15.99	16.008	15.98	2.07893e+07	2.6482e+07	1.57512e+07	1.55723e+07
102	(d40:3)	M+HCOO	662.573	C41H76O5N	14.747	14.774	14.747	14.744	14.747	14.755	14.747	14.789	738990	1.04501e+06	353055	646644
103	(d16:1/24:2)	M+HCOO	662.573	C41H76O5N	15.3292	15.329	15.3292	15.333	15.3292	15.327	15.3292	15.325	4.6007e+06	7.58345e+06	7.04571e+06	6.96706e+06
104	(d16:2/24:1)	M+CH3COO	676.589	C42H78O5N	16.544	16.546	16.544	16.541	16.544	16.556	16.544	16.512	631307	889205	2.36e+06	1.58434e+06
105	(d17:0/24:0)	M+HCOO	682.635	C42H84O5N	18.4037	18.383	18.4037	18.415	18.4037	18.404	18.4037	18.397	4.67373e+06	9.08149e+06	4.18638e+06	5.28346e+06
106	(d17:1/24:0)	M+HCOO	680.62	C42H82O5N	17.9609	17.969	17.9609	17.963	17.9609	17.953	17.9609	17.982	8.99592e+06	8.18205e+06	4.9332e+06	8.79274e+06
107	(d41:1+O)	M+HCOO	696.615	C42H82O6N	17.7431	17.758	17.7431	17.751	17.7431	17.758	17.7431	17.737	2.14892e+06	2.02237e+06	2.09231e+06	2.13554e+06
108	(d41:2)	M+HCOO	678.604	C42H80O5N	16.3944	16.388	16.3944	16.393	16.3944	16.422	16.3944	16.394	1.0651e+06	1.67552e+06	690901	959317
109	(d17:1/24:1)	M+HCOO	678.604	C42H80O5N	16.8646	16.862	16.8646	16.856	16.8646	16.872	16.8646	16.899	4.89275e+06	6.30425e+06	5.05644e+06	5.79729e+06
110	(d16:1/25:1)	M+HCOO	678.604	C42H80O5N	17.2577	17.216	17.2577	17.234	17.2577	17.225	17.2577	17.261	1.29429e+06	2.3199e+06	1.36598e+06	1.72981e+06
111	(d15:1/26:1)	M+HCOO	678.604	C42H80O5N	17.7296	17.757	17.7296	17.752	17.7296	17.714	17.7296	17.733	2.50264e+06	2.92696e+06	2.3006e+06	4.18584e+06
112	(d17:1/24:2)	M+HCOO	676.589	C42H78O5N	15.9946	15.999	15.9946	15.975	15.9946	15.991	15.9946	16.002	1.1068e+06	1.89046e+06	1.667e+06	1.80685e+06
113	(d15:1/26:2)	M+HCOO	676.589	C42H78O5N	16.5488	16.547	16.5488	16.541	16.5488	16.554	16.5488	16.512	630995	872163	2.35458e+06	1.58816e+06
114	(d18:0/24:0)	M+HCOO	696.651	C43H86O5N	18.7665	18.772	18.7665	18.754	18.7665	18.787	18.7665	18.772	7.40562e+06	1.89554e+07	7.5119e+06	1.10807e+07
115	(d18:0/24:1)	M+HCOO	694.635	C43H84O5N	17.8903	17.88	17.8903	17.915	17.8903	17.889	17.8903	17.904	9.477e+06	2.42027e+07	1.56988e+07	1.74758e+07
116	(d18:1/24:0)	M-H	648.63	C42H82O3N	17.553	17.5647	17.541	17.5647	17.545	17.5647	17.548	17.5647	283565	345691	533035	871757
117	(d16:0/26:2)	M+HCOO	692.62	C43H82O5N	16.9997	17.006	16.9997	17.022	16.9997	17.001	16.9997	17.003	4.13542e+06	9.67578e+06	5.16576e+06	6.42064e+06
118	(d42:2)	M+HCOO	692.62	C43H82O5N	18.2207	18.228	18.2207	18.206	18.2207	18.224	18.2207	18.226	2.1676e+06	2.79397e+06	720109	2.43106e+06
119	(d42:2+O)	M+HCOO	708.615	C43H82O6N	15.774	15.794	15.774	15.784	15.774	15.784	15.774	15.789	471620	1.24152e+06	1.05292e+06	1.4441e+06
120	(d18:1/24:2)	M+HCOO	690.604	C43H80O5N	16.5892	16.595	16.5892	16.583	16.5892	16.609	16.5892	16.601	2.23091e+06	3.75228e+06	4.57342e+06	4.63509e+06
121	(d42:3)	M+HCOO	690.604	C43H80O5N	17.2329	17.215	17.2329	17.233	17.2329	17.208	17.2329	17.218	1.78903e+06	3.16713e+06	494340	2.0824e+06
122	(d43:1)	M+HCOO	708.651	C44H86O5N	18.3182	18.315	18.3182	18.308	18.3182	18.312	18.3182	18.321	417567	828445	333005	336417
123	(d44:1)	M+HCOO	722.667	C45H88O5N	18.6834	18.698	18.6834	18.721	18.6834	18.684	18.6834	18.678	693830	1.70454e+06	653252	1.07093e+06
124	(d20:1/24:0)	M+HCOO	722.667	C45H88O5N	19.1988	19.204	19.1988	19.205	19.1988	19.219	19.1988	19.209	535822	1.00976e+06	763234	1.42012e+06
125	(d18:0/26:2)	M+HCOO	720.651	C45H86O5N	17.992	17.963	17.992	17.962	17.992	17.954	17.992	17.971	488979	1.19679e+06	458514	588852
126	(d20:1/24:1)	M+HCOO	720.651	C45H86O5N	18.4226	18.429	18.4226	18.448	18.4226	18.426	18.4226	18.441	577359	964102	1.22888e+06	1.80015e+06
127	(m31:0+O)	M+HCOO	542.479	C32H64O5N	11.662	11.666	11.669	11.666	11.671	11.666	11.662		226742	1.13156e+06	1.81785e+06	1.13014e+06
128	(m42:0+O)	M+HCOO	696.651	C43H86O5N	18.776	18.772	18.776	18.754	18.776	18.787	18.776	18.772	7.40562e+06	1.89554e+07	7.5119e+06	1.10807e+07
129	(t32:0)	M+HCOO	572.49	C33H66O6N	12.725	12.7424	12.724	12.7424	12.708	12.7424	12.72	12.7424	4.39239e+06	5.87698e+06	6.21679e+06	7.97679e+06
130	(t20:1/12:0)	M+HCOO	570.474	C33H64O6N	11.358	11.3714	11.37	11.3714	11.383	11.3714	11.376	11.3714	2.83053e+06	3.62291e+06	4.61774e+06	4.10219e+06
131	(t16:0/18:0)	M+HCOO	600.521	C35H70O6N	10.921	10.938	10.948	10.938	10.922	10.938	10.979	10.938	5.02547e+06	6.70079e+06	7.88673e+06	6.94002e+06
132	(t16:1/18:0)	M+HCOO	598.505	C35H68O6N	14.301	14.2805	14.276	14.2805	14.287	14.2805	14.286	14.2805	1.57504e+06	2.35358e+06	2.01994e+06	1.80118e+06
133	(t18:1/16:0)	M+HCOO	598.505	C35H68O6N	14.339	14.3311	14.334	14.3311	14.311	14.3311	14.32	14.3311	1.03324e+06	1.68594e+06	3.65709e+06	1.34866e+06
134	(t16:0/20:0)	M+HCOO	628.552	C37H74O6N	11.101	11.106	11.093	11.106	11.082	11.106	11.095	11.106	3.96558e+06	4.45678e+06	4.09804e+06	4.01137e+06
135	(t16:1/20:0)	M+HCOO	626.537	C37H72O6N	15.561	15.5733	15.588	15.5733	15.566	15.5733	15.572	15.5733	5.37782e+06	5.93869e+06	6.9342e+06	3.70271e+06
136	(t16:1/21:0)	M+HCOO	640.552	C38H74O6N	11.0038	10.987	11.0038	10.998	11.0038	11.009	11.0038	10.981	5.63437e+06	5.56876e+06	3.06553e+06	2.5696e+06
137	(t16:0/22:0)	M+HCOO	656.583	C39H78O6N	17.9054	17.942	17.9054	17.924	17.9054	17.936	17.9054	17.905	3.61945e+06	3.51496e+06	2.07186e+06	2.32837e+06
138	(t16:1/22:1)	M+HCOO	652.552	C39H74O6N	14.2455	14.238	14.2455	14.264	14.2455	14.252	14.2455	14.261	2.69425e+06	3.36298e+06	1.7973e+06	1.92059e+06
139	(t16:1/23:0)	M+HCOO	668.583	C40H78O6N	15.882	15.8749	15.854	15.8749	15.868	15.8749	15.874	15.8749	1.34555e+07	1.4221e+07	6.69409e+06	7.58266e+06
140	(t16:1/23:1)	M+HCOO	666.568	C40H76O6N	18.9702	18.976	18.9702	18.988	18.9702	18.979	18.9702	18.973	1.13345e+06	1.57824e+06	659079	471075
141	(t39:6)	M-H	612.5	C39H66O4N	16.03	16.0373	16.022	16.0373	16.027	16.0373	16.005	16.0373	0	993.195	777394	9197.04
142	(t16:0/24:0)	M+HCOO	684.615	C41H82O6N	17.0904	17.111	17.0904	17.092	17.0904	17.118	17.0904	17.098	2.52318e+06	1.82205e+06	976857	1.31628e+06
143	(t17:1/23:0)	M+HCOO	682.599	C41H80O6N	17.2593	17.249	17.2593	17.252	17.2593	17.28	17.2593	17.257	1.87439e+07	2.1697e+07	9.17492e+06	1.36236e+07
144	(t16:1/24:1)	M+HCOO	680.583	C41H78O6N	15.9893	15.997	15.9893	15.978	15.9893	15.99	15.9893	15.98	2.07893e+07	2.6482e+07	1.57512e+07	1.55723e+07
145	(t18:0/23:0)	M+HCOO	698.63	C42H84O6N	17.5976	17.599	17.5976	17.578	17.5976	17.583	17.5976	17.591	1.2557e+06	794703	458742	1.12328e+06
146	(t17:0/24:0)	M+CH3COO	712.646	C43H86O6N	18.0513	18.081	18.0513	18.023	18.0513	18.052	18.0513	18.052	1.82282e+06	1.87512e+06	856055	2.31552e+06
147	(t18:1/23:0)	M+HCOO	696.615	C42H82O6N	17.7536	17.758	17.7536	17.752	17.7536	17.757	17.7536	17.737	2.1227e+06	1.99565e+06	2.10849e+06	2.14102e+06
148	(t17:1/24:1)	M+HCOO	694.599	C42H80O6N	16.3896	16.403	16.3896	16.35	16.3896	16.42	16.3896	16.377	1.12852e+06	1.06032e+06	417856	606499
149	(t18:1/24:0)	M+HCOO	710.63	C43H84O6N	18.1755	18.194	18.1755	18.171	18.1755	18.187	18.1755	18.203	2.34468e+06	1.58234e+06	1.78829e+06	2.72658e+06
150	(t18:1/24:0+O)	M+HCOO	726.625	C43H84O7N	17.2826	17.301	17.2826	17.282	17.2826	17.283	17.2826	17.256	1.30585e+06	1.42888e+06	820077	874767
151	(t18:1/24:1)	M+HCOO	708.615	C43H82O6N	17.1734	17.157	17.1734	17.166	17.1734	17.172	17.1734	17.173	1.58819e+06	2.30886e+06	4.00656e+06	1.91769e+06
152	(t18:1/25:4)	M-H	670.578	C43H76O4N	12.2269	12.236	12.2269	12.235	12.2269	12.241	12.2269	12.249	9.84004e+06	8.11706e+06	9.36574e+06	1.21502e+07
153	(t18:0/25:5)	M-H	670.578	C43H76O4N	12.5923	12.592	12.5923	12.559	12.5923	12.618	12.5923	12.585	5.5071e+06	4.72946e+06	6.17562e+06	5.06653e+06
HexCer
1	(d33:2)	M+HCOO	728.532	C40H74O10N	10.6268	10.595	10.6268	10.626	10.6268	10.616	10.6268	10.628	3.87576e+06	4.38165e+06	2.29091e+06	3.91724e+06
2	(d34:0)	M+HCOO	746.579	C41H80O10N	15.1187	15.1187	15.1187	15.1187	15.177	15.149	15.125	15.184	1.33741e+06	1.23309e+06	1.27058e+06	1.58541e+06
3	(d34:1)	M+HCOO	744.563	C41H78O10N	13.876	13.876	13.876	13.876	13.907	13.885	13.883	13.909	9.69098e+06	9.82545e+06	1.07417e+07	1.00689e+07
4	(d34:3)	M+HCOO	740.532	C41H74O10N	14.055	14.055	14.055	14.055	13.924	14.053	14.065	14.048	158668	134187	1.20425e+06	0
5	(d14:1/20:4)	M+HCOO	736.501	C41H70O10N	11.841	11.841	11.841	11.841	11.843	11.846	11.835	11.834	1.43241e+08	1.45218e+08	1.14761e+08	1.62812e+08
6	(d35:2)	M+HCOO	756.563	C42H78O10N	13.471	13.471	13.471	13.471	13.47	13.682	13.503	13.448	2.59137e+06	1.49924e+06	1.02212e+06	1.25128e+06
7	(d14:0/22:0)	M+HCOO	774.61	C43H84O10N	14.7485	14.7485	14.7485	14.7485	14.768	14.759	14.766	14.757	6.9431e+07	1.08205e+08	5.27657e+07	8.70748e+07
8	(d36:2)	M+HCOO	770.579	C43H80O10N	14.1102	14.1102	14.1102	14.1102	14.147	14.129	14.114	14.158	6.828e+06	6.72891e+06	6.05272e+06	7.37866e+06
9	(d36:3)	M+HCOO	768.563	C43H78O10N	12.8096	12.8096	12.8096	12.8096	12.81	12.824	12.846	12.836	3.24676e+06	3.43579e+06	3.36717e+06	2.92247e+06
10	(d36:4)	M+HCOO	766.547	C43H76O10N	13.082	13.082	13.082	13.082	13.086	13.098	13.074	13.091	4.70627e+06	4.33667e+06	5.22797e+06	3.82371e+06
11	(d14:0/22:4)	M+HCOO	766.547	C43H76O10N	13.879	13.879	13.879	13.879	13.879	13.929	13.862	13.871	5.67242e+06	5.06647e+06	2.61902e+06	3.73107e+06
12	(d16:0/20:5)	M+HCOO	764.532	C43H74O10N	11.4494	11.4494	11.4494	11.4494	11.496	11.493	11.422	11.454	3.56849e+06	3.53871e+06	3.94517e+06	3.20669e+06
13	(d16:2/20:4)	M+HCOO	762.516	C43H72O10N	11.353	11.353	11.353	11.353	11.38	11.391	11.377	11.362	3.67694e+06	2.88463e+06	1.1083e+06	719379
14	(d37:2)	M+HCOO	784.594	C44H82O10N	14.524	14.524	14.524	14.524	14.656	14.543	14.563	14.551	453924	105547	117005	118441
15	(d17:0/20:5)	M+HCOO	778.547	C44H76O10N	13.131	13.131	13.131	13.131	13.113	12.887	13.326	13.332	2.03584e+06	1.52806e+06	2.22244e+06	1.36519e+06
16	(d16:0/22:0)	M+HCOO	802.641	C45H88O10N	16.051	16.051	16.051	16.051	16.063	16.082	16.07	16.07	7.65648e+07	1.31096e+08	4.46414e+07	9.91041e+07
17	(d38:4)	M+HCOO	794.579	C45H80O10N	15.148	15.148	15.148	15.148	15.161	15.185	15.148	15.143	1.96144e+06	1.04626e+06	371826	892491
18	(d18:1/20:5)	M+HCOO	790.547	C45H76O10N	11.5622	11.5622	11.5622	11.5622	11.576	11.52	11.598	11.555	1.0239e+06	978078	1.84258e+06	865042
19	(d18:2/20:4)	M+HCOO	790.547	C45H76O10N	13.1736	13.1736	13.1736	13.1736	13.189	13.163	13.173	13.179	8.46239e+07	9.06761e+07	1.0801e+08	1.10401e+08
20	(d16:2/22:5)	M+HCOO	788.532	C45H74O10N	11.7774	11.7774	11.7774	11.7774	11.788	11.792	11.769	11.778	2.03645e+07	1.72111e+07	1.01606e+07	1.31536e+07
21	(d16:0/24:1)	M+HCOO	828.657	C47H90O10N	15.9453	15.9453	15.9453	15.9453	15.979	15.969	15.978	15.972	2.46036e+07	5.14946e+07	2.23427e+07	4.35013e+07
22	(d16:0/24:2)	M+HCOO	826.641	C47H88O10N	14.8208	14.8208	14.8208	14.8208	14.81	14.819	14.834	14.828	9.74235e+06	1.54195e+07	7.03685e+06	1.04645e+07
23	(d40:2)	M+HCOO	826.641	C47H88O10N	17.6581	17.6581	17.6581	17.6581	17.65	17.651	17.66	17.669	1.27266e+07	2.6121e+07	1.14947e+07	3.0768e+07
24	(d19:0/22:4)	M+HCOO	836.626	C48H86O10N	16.366	16.366	16.366	16.366	16.366	16.408	16.38	16.387	6.14475e+06	6.85997e+06	4.44058e+06	7.02575e+06
25	(d18:1/24:0)	M+HCOO	856.688	C49H94O10N	17.8374	17.8374	17.8374	17.8374	17.838	17.839	17.852	17.879	3.91371e+06	6.39211e+06	4.60514e+06	4.992e+06
26	(d22:1/20:4)	M+HCOO	848.626	C49H86O10N	16.6387	16.6387	16.6387	16.6387	16.611	16.612	16.597	16.638	302292	223176	241529	403096
27	(t32:0)	M+CH3COO	748.558	C40H78O11N	17.4791	17.508	17.4791	17.467	17.4791	17.481	17.4791		1.63934e+06	311876	1.52081e+06	237187
28	(t33:1)	M+CH3COO	760.558	C41H78O11N	12.508	12.508	12.508	12.508	12.494	12.497	12.499	12.505	7.83739e+06	6.89973e+06	1.11994e+07	7.24038e+06
29	(t34:0)	M+CH3COO	776.589	C42H82O11N	13.8656	13.8656	13.8656	13.8656	13.885	13.857	13.885	13.872	1.24997e+08	1.13329e+08	1.20973e+08	7.52736e+07
30	(t34:1)	M+HCOO	760.558	C41H78O11N	12.5188	12.5188	12.5188	12.5188	12.494	12.497	12.5	12.506	7.80488e+06	6.8994e+06	1.12027e+07	7.24282e+06
31	(t34:2)	M+HCOO	758.542	C41H76O11N	11.881	11.881	11.881	11.881	11.887	11.838	11.907	11.843	46920.9	1.72938e+06	125171	1.6032e+06
32	(t35:1)	M+CH3COO	788.589	C43H82O11N	13.374	13.374	13.374	13.374	13.368	13.377	13.367	13.39	8.68451e+06	1.04726e+07	6.03479e+06	8.02225e+06
33	(t35:2)	M-H	726.553	C41H76O9N	13.99	13.99	13.99	13.99	14.026	14.037	14.025	14.032	1.92671e+06	1.88685e+06	1.8566e+06	1.27413e+06
34	(t35:3)	M+CH3COO	784.558	C43H78O11N	11.845	11.845	11.845	11.845	11.843	11.836	11.842	11.835	1.57603e+07	1.42253e+07	8.06248e+06	8.83381e+06
35	(t36:0)	M+HCOO	790.605	C43H84O11N	15.767	15.767	15.767	15.767	15.769	15.784	15.786	15.781	3.40864e+06	1.11359e+07	1.16011e+06	8.57734e+06
36	(t36:1)	M+HCOO	788.589	C43H82O11N	13.9863	13.9863	13.9863	13.9863	13.997	13.97	13.982	13.967	1.58195e+07	1.82796e+07	1.39398e+07	1.19814e+07
37	(t36:2)	M+CH3COO	800.589	C44H82O11N	13.3668	13.3668	13.3668	13.3668	13.285	13.307	13.287	13.297	8.2015e+06	7.50914e+06	2.54534e+06	1.6963e+06
38	(t36:3)	M+HCOO	784.558	C43H78O11N	11.834	11.834	11.834	11.834	11.844	11.837	11.84	11.834	1.60118e+07	1.42788e+07	8.05115e+06	8.73519e+06
39	(t17:0/20:5)	M-H	748.537	C43H74O9N	12.745	12.745	12.745	12.745	12.738	12.771	12.75	12.744	5.47325e+06	6.37569e+06	9.9352e+06	3.92611e+06
40	(t17:1/20:5)	M-H	746.521	C43H72O9N	11.658	11.658	11.658	11.658	11.634	11.693	11.654	11.622	7.61055e+06	1.53765e+07	1.74504e+06	2.10199e+06
41	(t38:1)	M+HCOO	816.621	C45H86O11N	14.9588	14.9588	14.9588	14.9588	14.961	14.966	14.968	14.951	1.4561e+08	1.23041e+08	1.34639e+08	8.18918e+07
42	(t38:2)	M+HCOO	814.605	C45H84O11N	14.1868	14.1868	14.1868	14.1868	14.178	14.186	14.189	14.218	3.60631e+06	3.77562e+06	3.21925e+06	2.08794e+06
43	(t18:0/20:4)	M+HCOO	810.574	C45H80O11N	12.3105	12.3105	12.3105	12.3105	12.304	12.32	12.311	12.31	3.31884e+08	2.6411e+08	1.49528e+08	1.31217e+08
44	(t18:0/20:5)	M+HCOO	808.558	C45H78O11N	11.4054	11.4054	11.4054	11.4054	11.399	11.392	11.385	11.376	4.57913e+07	3.2667e+07	2.64749e+07	2.56368e+07
45	(t18:1/20:5)	M+CH3COO	820.558	C46H78O11N	12.74	12.74	12.74	12.74	12.738	12.708	12.731	12.705	9.62117e+06	8.45983e+06	8.72981e+06	8.6795e+06
46	(t17:0/22:5)	M-H	776.568	C45H78O9N	14.8637	14.8637	14.8637	14.8637	14.866	14.654	14.877	14.874	1.99371e+07	4.7576e+07	1.21925e+08	5.10168e+07
47	(t17:0/22:6)	M+CH3COO	834.574	C47H80O11N	11.445	11.445	11.445	11.445	11.45	11.471	11.481	11.438	1.25813e+07	1.12209e+07	7.48034e+06	6.75734e+06
48	(t20:0/20:4)	M+HCOO	838.605	C47H84O11N	14.4601	14.4601	14.4601	14.4601	14.478	14.461	14.48	14.456	1.51896e+06	7.54592e+06	319796	8.98885e+06
49	(t20:0/20:5)	M+HCOO	836.589	C47H82O11N	12.8647	12.8647	12.8647	12.8647	12.86	12.884	12.856	12.886	2.05481e+08	1.90556e+08	1.23795e+08	1.20688e+08
50	(t18:0/22:6)	M+HCOO	834.574	C47H80O11N	11.4623	11.4623	11.4623	11.4623	11.45	11.471	11.48	11.438	1.25742e+07	1.11621e+07	7.43888e+06	6.7584e+06
51	(t20:1/20:5)	M+CH3COO	848.589	C48H82O11N	13.332	13.332	13.332	13.332	13.333	13.526	13.326	13.324	373727	1.96055e+06	47928.2	1.39142e+06
52	(t20:0/22:6)	M+HCOO	862.605	C49H84O11N	12.8761	12.8761	12.8761	12.8761	12.868	12.88	12.854	12.867	1.29087e+07	1.27533e+07	1.39327e+07	1.371e+07
53	(t20:1/22:6)	M+HCOO	860.589	C49H82O11N	10.2433	10.2433	10.2433	10.2433	10.245	10.23	10.216	10.222	1.39627e+06	1.96715e+06	151986	103821
54	(d30:1)	M-H	804.548	C42H78O13N	5.58588	5.58588	5.58588	5.58588	5.6	5.595	5.563	5.611	551099	3.19194e+06	66055.2	413639
55	(d32:3)	M+HCOO	874.553	C45H80O15N	10.092	10.092	10.092	10.092	10.095	10.089	10.089	10.078	6.5367e+06	7.52239e+06	6.36555e+06	2.92089e+06
56	(d33:2)	M+HCOO	890.585	C46H84O15N	10.8789	10.8789	10.8789	10.8789	10.878	10.866	10.874	10.87	4.54922e+06	4.54833e+06	2.04166e+07	9.00822e+06
57	(d14:0/22:6)	M+HCOO	924.569	C49H82O15N	11.729	11.729	11.729	11.729	11.879	11.757	11.714	11.745	3.07727e+06	1.17064e+06	4.0982e+06	2.82269e+06
58	(d16:2/20:5)	M+HCOO	922.553	C49H80O15N	12.823	12.823	12.823	12.823	12.686	12.816	12.655	12.814	1.89076e+07	1.74242e+07	2.28872e+07	1.7253e+07
59	(d15:2/22:6)	M-H	888.548	C49H78O13N	16.738	16.706	16.739	16.744	16.7282	16.7282	16.7282	16.7282	3.91889e+06	790435	2.57424e+06	1.47975e+06
60	(d16:0/22:6)	M-H	906.595	C50H84O13N	14.14	14.14	14.14	14.14	14.147	14.253	14.221	14.175	1.53355e+06	1.63099e+06	3.92331e+06	891268
61	(d16:1/22:6)	M+HCOO	950.585	C51H84O15N	12.116	12.116	12.116	12.116	12.123	12.113	12.098	12.105	987331	274913	1.69628e+06	737699
62	(m36:2)	M-H	870.631	C48H88O12N	16.0686	16.0686	16.0686	16.0686	16.069	16.083	16.065	16.073	9.12994e+06	1.48456e+07	6.30686e+06	1.16956e+07
63	(m37:3)	M-H	882.631	C49H88O12N	14.2309	14.2309	14.2309	14.2309	14.213	14.19	14.218	14.214	1.7148e+07	1.32926e+07	1.10051e+07	1.01364e+07
64	(m38:2)	M-H	898.663	C50H92O12N	17.2242	17.2242	17.2242	17.2242	17.224	17.232	17.252	17.229	2.4687e+06	5.23872e+06	2.01361e+06	3.65887e+06
65	(m39:1)	M-H	914.694	C51H96O12N	17.388	17.388	17.388	17.388	17.38	17.393	17.37	17.378	6.73665e+07	1.69315e+08	7.72986e+07	1.06393e+08
66	(m19:0/20:5)	M-H	906.631	C51H88O12N	14.262	14.262	14.262	14.262	14.253	14.252	14.263	14.266	5.79321e+06	4.66289e+06	1.315e+07	3.14673e+06
67	(m17:0/22:6)	M-H	904.616	C51H86O12N	13.4185	13.4185	13.4185	13.4185	13.41	13.425	13.406	13.416	1.24346e+07	1.19415e+07	3.16772e+07	1.42584e+07
68	(t17:0/20:4)	M-H	912.605	C49H86O14N	14.502	14.502	14.502	14.502	14.479	14.511	14.531	14.576	4.03451e+06	4.02499e+06	2.29424e+06	4.00069e+06
69	(t17:0/20:5)	M-H	910.59	C49H84O14N	13.526	13.526	13.526	13.526	13.526	13.56	13.526	13.561	3.63764e+06	4.1866e+06	1.67863e+06	6.17009e+06
70	(t17:0/22:6)	M-H	936.605	C51H86O14N	14.033	14.033	14.033	14.033	14.034	14.059	14.03	14.032	383767	641894	52510.5	1.77788e+06
SM
1	(d30:0)	M+H	649.528	C35H74O6N2P	11.052	11.062	11.052	11.059	11.052	11.053	11.052	11.052	1.81856e+06	1.85832e+06	6.39781e+06	2.30667e+06
2	(d30:1)	M+H	647.512	C35H72O6N2P	13.093	13.0979	13.096	13.0979	13.102	13.0979	13.126	13.0979	1.60642e+07	1.42476e+07	2.77697e+07	1.6484e+07
3	(d31:0)	M+H	663.544	C36H76O6N2P	8.90763	8.91	8.90763	8.919	8.90763	8.913	8.90763	8.903	3.35759e+06	3.62395e+06	6.8852e+06	3.53519e+06
4	(d16:1/15:0)	M+H	661.528	C36H74O6N2P	16.366	16.3615	16.349	16.3615	16.356	16.3615	16.36	16.3615	1.32485e+07	1.20781e+07	1.32221e+07	9.14677e+06
5	(d32:0)	M+H	677.559	C37H78O6N2P	13.4319	13.442	13.4319	13.447	13.4319	13.474	13.4319	13.426	1.82908e+08	1.80904e+08	2.98766e+08	1.65599e+08
6	(d32:1)	M+H	675.544	C37H76O6N2P	12.846	12.8548	12.853	12.8548	12.851	12.8548	12.838	12.8548	1.30524e+06	1.06793e+06	2.22434e+07	4.75471e+06
7	(d16:0/16:1)	M+Na	697.525	C37H75O6N2PNa	11.635	11.65	11.64	11.65	11.646	11.65	11.66	11.65	9.90958e+07	9.73881e+07	9.62479e+07	1.09759e+08
8	(d17:1/15:0)	M+H	675.544	C37H76O6N2P	14.723	14.763	14.763	14.763	14.765	14.763	14.722	14.763	3.77903e+06	3.17248e+06	3.37576e+06	2.57945e+06
9	(d32:2)	M+H	673.528	C37H74O6N2P	11.282	11.0342	11.286	11.0342	11.274	11.0342	11.281	11.0342	4.12336e+06	2.36394e+06	2.2416e+06	1.99435e+06
10	(d33:0)	M+H	691.575	C38H80O6N2P	14.8643	14.871	14.8643	14.863	14.8643	14.899	14.8643	14.867	5.84629e+07	6.01901e+07	5.95858e+07	3.63955e+07
11	(d17:0/16:1)	M+Na	711.541	C38H77O6N2PNa	14.674	14.6576	14.663	14.6576	14.646	14.6576	14.667	14.6576	4.33941e+07	4.28771e+07	2.70238e+07	3.9189e+07
12	(d33:2)	M+H	687.544	C38H76O6N2P	13.8738	13.886	13.8738	13.885	13.8738	13.883	13.8738	13.899	4.16192e+06	4.06947e+06	2.67413e+06	1.86136e+06
13	(d16:1/17:1)	M+H	687.544	C38H76O6N2P	11.953	11.9473	11.943	11.9473	11.945	11.9473	11.967	11.9473	5.72998e+06	2.59362e+06	3.76114e+06	4.46774e+06
14	(d34:0)	M+H	705.591	C39H82O6N2P	14.6578	14.694	14.6578	14.712	14.6578	14.735	14.6578	14.741	1.41246e+08	1.69519e+08	3.60101e+08	1.46065e+08
15	(d16:1/18:0)	M+Na	725.557	C39H79O6N2PNa	18.5559	18.576	18.5559	18.555	18.5559	18.58	18.5559	18.572	4.72683e+07	4.65025e+07	5.4284e+07	5.74494e+07
16	(d34:3)	M+H	699.544	C39H76O6N2P	9.687	9.69295	9.684	9.69295	9.68	9.69295	9.699	9.69295	6.79389e+06	8.33571e+06	1.3292e+07	9.13866e+06
17	(d34:4)	M+H	697.528	C39H74O6N2P	14.8085	14.819	14.8085	14.834	14.8085	14.816	14.8085	14.812	8.73417e+07	8.70107e+07	9.31687e+07	1.00689e+08
18	(d35:0)	M+H	719.606	C40H84O6N2P	13.664	13.6664	13.663	13.6664	13.67	13.6664	13.648	13.6664	3.79638e+07	4.49102e+07	9.89423e+07	4.04798e+07
19	(d35:2)	M+H	715.575	C40H80O6N2P	11.821	11.7979	11.806	11.7979	11.875	11.7979	11.77	11.7979	1.51892e+07	1.33779e+07	1.56696e+07	5.63967e+06
20	(d35:4)	M+H	711.544	C40H76O6N2P	19.244	19.26	19.251	19.26	19.252	19.26	19.238		3.09774e+06	2.42978e+06	1.27556e+06	2.11916e+06
21	(d36:0)	M+H	733.622	C41H86O6N2P	14.36	14.3647	14.365	14.3647	14.376	14.3647	14.358	14.3647	2.63436e+08	3.64585e+08	3.06332e+08	2.87709e+08
22	(d36:1)	M+H	731.606	C41H84O6N2P	13.882	13.839	13.884	13.839	13.843	13.839	13.883	13.839	1.13991e+09	9.85255e+08	8.40684e+08	7.22678e+08
23	(d16:1/20:0)	M+H	731.606	C41H84O6N2P	14.313	14.248	14.363	14.248	14.214	14.248	14.291	14.248	4.60743e+06	5.10313e+06	3.83451e+06	5.43291e+06
24	(d36:2)	M+H	729.591	C41H82O6N2P	12.32	12.2871	12.279	12.2871	12.306	12.2871	12.271	12.2871	2.66948e+07	4.10919e+07	39253346	3.3919e+07
25	(d36:3)	M+H	727.575	C41H80O6N2P	12.93	12.9515	12.918	12.9515	12.969	12.9515	12.939	12.9515	1.23242e+06	2.79292e+06	7.61716e+06	2.40909e+06
26	(d36:4)	M+H	725.559	C41H78O6N2P	12.349	12.2967	12.347	12.2967	12.323	12.2967	12.322	12.2967	4.59672e+07	4.69008e+07	5.43918e+07	5.78352e+07
27	(d37:0)	M+H	747.637	C42H88O6N2P	15.05	15.0399	15.039	15.0399	15.027	15.0399	15.028	15.0399	3.83204e+07	5.62951e+07	4.19667e+07	2.97043e+07
28	(d16:1/21:0)	M+Na	767.604	C42H85O6N2PNa	14.571	14.5354	14.574	14.5354	14.586	14.5354	14.565	14.5354	5.72893e+07	4.68768e+07	4.94396e+07	3.699e+07
29	(d37:2)	M+H	743.606	C42H84O6N2P	13.992	13.9994	14	13.9994	13.994	13.9994	14	13.9994	7.04177e+06	6.12577e+06	8.76862e+06	8.17557e+06
30	(d37:3)	M+H	741.591	C42H82O6N2P	13.643	13.6471	13.686	13.6471	13.626	13.6471	13.648	13.6471	1.28868e+06	2.02717e+06	5.52932e+06	2.09862e+06
31	(d19:0/18:4)	M+H	739.575	C42H80O6N2P	13.092	13.1146	13.098	13.1146	13.11	13.1146	13.12	13.1146	2.79009e+07	2.46767e+07	4.04132e+07	3.09934e+07
32	(d38:0)	M+H	761.653	C43H90O6N2P	15.705	15.7064	15.692	15.7064	15.699	15.7064	15.71	15.7064	2.14902e+08	2.56304e+08	1.20035e+08	1.69627e+08
33	(d16:1/22:0)	M+Na	781.619	C43H87O6N2PNa	15.284	15.2472	15.27	15.2472	15.273	15.2472	15.296	15.2472	4.87061e+07	3.94413e+07	3.38066e+07	2.0682e+07
34	(d38:2)	M+H	757.622	C43H86O6N2P	13.723	13.7315	13.717	13.7315	13.729	13.7315	13.735	13.7315	9.93374e+07	1.16895e+08	9.47414e+07	9.81081e+07
35	(d14:0/24:2)	M+H	757.622	C43H86O6N2P	14.678	14.6594	14.67	14.6594	14.666	14.6594	14.666	14.6594	1.2603e+07	1.27654e+07	9.3666e+06	1.53001e+07
36	(d38:3)	M+H	755.606	C43H84O6N2P	12.589	12.504	12.474	12.504	12.473	12.504	12.469	12.504	1.27674e+07	1.68653e+07	1.33346e+07	1.41988e+07
37	(d16:1/22:2)	M+H	755.606	C43H84O6N2P	14.362	14.3612	14.363	14.3612	14.379	14.3612	14.362	14.3612	1.37448e+07	1.64458e+07	2.05444e+07	1.25313e+07
38	(d16:1/22:3)	M+H	753.591	C43H82O6N2P	13.714	13.7102	13.671	13.7102	13.671	13.7102	13.721	13.7102	1.3572e+06	738717	70544.6	240657
39	(d39:0)	M+H	775.669	C44H92O6N2P	16.359	16.3387	16.341	16.3387	16.337	16.3387	16.336	16.3387	3.97021e+07	4.01792e+07	2.0386e+07	1.90872e+07
40	(d17:1/22:0)	M+Na	795.635	C44H89O6N2PNa	15.86	15.8666	15.853	15.8666	15.865	15.8666	15.858	15.8666	6.12507e+07	5.01953e+07	3.94277e+07	2.70746e+07
41	(d39:2)	M+H	771.637	C44H88O6N2P	14.45	14.4463	14.43	14.4463	14.447	14.4463	14.439	14.4463	8.11392e+07	1.13443e+08	7.63999e+07	6.1072e+07
42	(d16:1/23:1)	M+H	771.637	C44H88O6N2P	15.357	15.3351	15.328	15.3351	15.342	15.3351	15.338	15.3351	1.32488e+07	1.29424e+07	1.27989e+07	1.25519e+07
43	(d16:1/23:2)	M+H	769.622	C44H86O6N2P	15.003	15.047	15.041	15.047	15.033	15.047	15.042	15.047	1.17361e+06	2.28719e+06	2.39654e+06	898522
44	(d16:1/23:3)	M+H	767.606	C44H84O6N2P	14.572	14.581	14.574	14.581	14.569	14.581	14.564	14.581	5.72329e+07	4.6609e+07	4.95481e+07	3.66381e+07
45	SM(d40:0)	M+H	789.684	C45H94O6N2P	16.935	16.9299	16.926	16.9299	16.929	16.9299	16.913	16.9299	6.86965e+07	6.12572e+07	1.92695e+07	3.74852e+07
46	(d17:1/23:0)	M+H	787.669	C45H92O6N2P	15.61	15.6067	15.584	15.6067	15.596	15.6067	15.597	15.6067	5.83053e+07	1.21003e+08	5.92159e+07	9.10016e+07
47	(d16:1/24:0)	M+H	787.669	C45H92O6N2P	15.954	15.954	15.915	15.954	15.961	15.954	15.96	15.954	2.32853e+06	2.52755e+06	1.66319e+06	3.16038e+06
48	(d18:1/22:0)	M+Na	809.651	C45H91O6N2PNa	16.508	16.4935	16.486	16.4935	16.466	16.4935	16.481	16.4935	4.01351e+07	3.43433e+07	2.87652e+07	2.30511e+07
49	(d40:2)	M+H	785.653	C45H90O6N2P	15.084	15.1101	15.107	15.1101	15.113	15.1101	15.093	15.1101	2.16204e+08	2.79246e+08	2.68789e+08	1.78035e+08
50	(d40:3)	M+H	783.637	C45H88O6N2P	14.01	13.9847	14.002	13.9847	13.944	13.9847	13.914	13.9847	1.98716e+07	2.25744e+07	1.2952e+07	1.2643e+07
51	(d16:0/24:3)	M+H	783.637	C45H88O6N2P	14.808	14.854	14.809	14.854	14.819	14.854	14.821	14.854	5.99535e+06	1.11302e+07	4.44788e+06	6.92479e+06
52	(d17:1/23:2)	M+H	783.637	C45H88O6N2P	15.72	15.7105	15.698	15.7105	15.697	15.7105	15.712	15.7105	1.74633e+07	2.29302e+07	1.06269e+07	1.44915e+07
53	(d16:1/24:3)	M+H	781.622	C45H86O6N2P	15.284	15.2798	15.27	15.2798	15.273	15.2798	15.295	15.2798	4.84003e+07	3.80946e+07	3.20967e+07	2.06181e+07
54	(d41:0)	M+H	803.7	C46H96O6N2P	17.477	17.464	17.467	17.464	17.457	17.464	17.439	17.464	2.07797e+07	1.19198e+07	3.19362e+06	5.91891e+06
55	(d17:1/24:0)	M+Na	823.666	C46H93O6N2PNa	16.877	16.8843	16.875	16.8843	16.871	16.8843	16.896	16.8843	1.93774e+06	1.50756e+06	684894	714950
56	(d17:0/24:2)	M+H	799.669	C46H92O6N2P	16.591	16.5732	16.567	16.5732	16.575	16.5732	16.555	16.5732	1.17712e+07	1.10889e+07	9.77055e+06	9.7786e+06
57	(d41:3)	M+H	797.653	C46H90O6N2P	15.237	15.2358	15.228	15.2358	15.205	15.2358	15.264	15.2358	5.60648e+06	4.61425e+06	1.16889e+07	6.2621e+06
58	(d17:1/24:3)	M+H	795.637	C46H88O6N2P	15.857	15.8424	15.854	15.8424	15.866	15.8424	15.859	15.8424	5.83508e+07	4.92974e+07	3.87793e+07	2.65703e+07
59	(d41:5)	M+H	793.622	C46H86O6N2P	14.447	14.4479	14.444	14.4479	14.45	14.4479	14.461	14.4479	4.2335e+06	4.97456e+06	5.47217e+06	2.39606e+06
60	(d42:1)	M+H	815.7	C47H96O6N2P	17.594	17.5837	17.589	17.5837	17.578	17.5837	17.592	17.5837	8.00107e+07	7.12673e+07	7.06666e+07	7.57067e+07
61	(d42:2)	M+H	813.684	C47H94O6N2P	16.404	16.395	16.39	16.395	16.394	16.395	16.387	16.395	1.09068e+08	1.09614e+08	1.87082e+08	1.37652e+08
62	(d42:3)	M+H	811.669	C47H92O6N2P	15.262	15.2885	15.291	15.2885	15.297	15.2885	15.295	15.2885	1.25763e+07	1.61037e+07	1.85894e+07	1.56101e+07
63	(d18:1/24:2)	M+H	811.669	C47H92O6N2P	16.918	16.9325	16.931	16.9325	16.933	16.9325	16.912	16.9325	4.20638e+06	3.89068e+06	1.26245e+06	2.30148e+06
64	(d18:1/24:3)	M+H	809.653	C47H90O6N2P	16.508	16.4871	16.484	16.4871	16.466	16.4871	16.481	16.4871	3.8454e+07	3.35691e+07	2.8285e+07	2.24093e+07
65	(d42:5)	M+H	807.637	C47H88O6N2P	15.106	15.0963	15.116	15.0963	15.077	15.0963	15.107	15.0963	8.50457e+06	9.96205e+06	1.06698e+07	6.0189e+06
66	(d43:1)	M+H	829.716	C48H98O6N2P	18.041	18.0328	18.037	18.0328	18.042	18.0328	18.027	18.0328	3.02473e+06	2.81017e+06	2.64105e+06	2.63675e+06
67	(d20:0/23:2)	M+H	827.7	C48H96O6N2P	16.966	16.9692	16.961	16.9692	16.959	16.9692	16.979	16.9692	2.40834e+06	2.91773e+06	2.34592e+06	2.0979e+06
68	(d19:1/24:3)	M+H	823.669	C48H92O6N2P	17.075	17.0705	17.081	17.0705	17.058	17.0705	17.057	17.0705	5.07017e+06	4.24951e+06	3.64608e+06	3.42353e+06
69	(d43:5)	M+H	821.653	C48H90O6N2P	15.777	15.744	15.767	15.744	15.758	15.744	15.755	15.744	9.00316e+06	9.73001e+06	9.24e+06	6.35325e+06
70	(d44:2)	M+H	841.716	C49H98O6N2P	17.511	17.4869	17.468	17.4869	17.497	17.4869	17.486	17.4869	2.6327e+06	3.05721e+06	3.46573e+06	4.40835e+06
71	(d44:4)	M+H	837.684	C49H94O6N2P	17.569	17.5819	17.601	17.5819	17.576	17.5819	17.582	17.5819	5.25646e+06	4.68816e+06	4.42832e+06	4.67177e+06
72	(d44:5)	M+H	835.669	C49H92O6N2P	16.396	16.3965	16.408	16.3965	16.396	16.3965	16.412	16.3965	8.74345e+06	9.28439e+06	1.76279e+07	1.20427e+07
73	(t32:1)	M+H	691.538	C37H76O7N2P	11.087	11.0766	11.092	11.0766	11.068	11.0766	11.069	11.0766	5.34614e+06	5.89733e+06	4.17411e+06	4.78285e+06
74	(t33:0)	M+H	707.57	C38H80O7N2P	15.1364	15.14	15.1364	15.164	15.1364	15.232	15.1364	15.209	2.654e+06	2.53101e+06	1.19021e+06	1.12086e+06
75	(t34:0)	M+H	721.585	C39H82O7N2P	15.1253	15.136	15.1253	15.148	15.1253	15.147	15.1253	15.138	7.04644e+06	6.02605e+06	5.43026e+06	4.52902e+06
76	(t34:1)	M+H	719.57	C39H80O7N2P	13.4062	13.415	13.4062	13.408	13.4062	13.428	13.4062	13.41	2.32366e+06	1.97088e+06	2.25961e+06	2.55407e+06
77	(t35:0)	M+H	735.601	C40H84O7N2P	12.123	12.111	12.128	12.111	12.118	12.111	12.135	12.111	788402	804141	810086	367595
78	(t35:1)	M+H	733.585	C40H82O7N2P	11.041	11.04	11.013	11.04	11.048	11.04	11.029	11.04	514947	395302	261414	486976
79	(t36:1)	M+H	747.601	C41H84O7N2P	11.159	11.1695	11.166	11.1695	11.172	11.1695	11.167	11.1695	179423	273757	245507	168236
80	(t38:3)	M+H	771.601	C43H84O7N2P	15.939	15.9015	15.9	15.9015	15.916	15.9015	15.921	15.9015	1.16689e+07	1.07635e+07	6.64492e+06	6.0875e+06
81	(t38:4)	M+H	769.585	C43H82O7N2P	14.724	14.743	14.71	14.743	14.708	14.743	14.716	14.743	6.20856e+07	6.16867e+07	4.02076e+07	3.33895e+07
82	(t38:5)	M+H	767.57	C43H80O7N2P	13.613	13.635	13.612	13.635	13.593	13.635	13.599	13.635	6.68073e+07	5.86302e+07	4.56948e+07	3.79942e+07
83	(t38:6)	M+H	765.554	C43H78O7N2P	13.98	14.0959	14.335	14.0959	13.997	14.0959	14.344	14.0959	1.97361e+07	2.14063e+07	6.5871e+06	1.16353e+07
84	(t39:4)	M+H	783.601	C44H84O7N2P	13.619	13.645	13.603	13.645	13.816	13.645	13.657	13.645	4.79046e+07	2.41225e+07	1.63165e+06	1.5416e+06
85	(t39:5)	M+H	781.585	C44H82O7N2P	14.634	14.6162	14.628	14.6162	14.623	14.6162	14.648	14.6162	6.33529e+06	5.04138e+06	5.71294e+06	6.14126e+06
86	(t39:6)	M+H	779.57	C44H80O7N2P	15.334	15.327	15.311	15.327	15.311	15.327	15.336	15.327	2.10316e+07	4.03514e+07	1.40667e+06	2.08692e+07
87	(t39:7)	M+H	777.554	C44H78O7N2P	14.413	14.4012	14.397	14.4012	14.381	14.4012	14.393	14.4012	1.35973e+08	2.62157e+08	4.96469e+07	4.21782e+08
88	(t40:4)	M+H	797.617	C45H86O7N2P	15.976	15.98	15.957	15.98	15.977	15.98	16	15.98	1.7423e+07	1.6949e+07	9.90507e+06	9.28731e+06
89	(t40:5)	M+H	795.601	C45H84O7N2P	14.926	14.947	14.962	14.947	14.948	14.947	14.935	14.947	3.69191e+07	2.68955e+07	3.8667e+07	1.83702e+07
90	(t40:6)	M+H	793.585	C45H82O7N2P	12.864	12.852	12.884	12.852	12.853	12.852	12.838	12.852	8.47803e+08	6.41288e+08	325842014	4.08008e+08
91	(t40:7)	M+H	791.57	C45H80O7N2P	13.335	13.332	13.333	13.332	13.328	13.332	13.337	13.332	1.33988e+07	1.34942e+07	3.78599e+06	6.01244e+06
92	(t41:5)	M+H	809.617	C46H86O7N2P	14.202	14.2102	14.206	14.2102	14.169	14.2102	14.215	14.2102	2.66962e+07	1.71344e+07	1.20338e+07	6.87424e+06
93	(t41:7)	M+H	805.585	C46H82O7N2P	12.559	12.543	12.536	12.543	12.579	12.543	12.549	12.543	1.0469e+07	8.12778e+06	996846	1.78349e+06
94	(t42:5)	M+H	823.632	C47H88O7N2P	14.676	14.641	14.677	14.641	14.647	14.641	14.665	14.641	1.45865e+08	8.89123e+07	6.52979e+07	5.51084e+07
DG
1	(6:0/10:2)	M+NH4	358.259	C19H36O5N	1.198	1.197	1.212	1.224	1.22202	1.22202	1.22202	1.22202	3.19651e+06	1.88949e+06	4.80608e+06	2.24893e+06
2	(18:0)	M+NH4	390.321	C21H44O5N	2.636	2.651	2.643	2.664	2.635	2.635	2.635	2.635	579049	64668.2	35682.8	330872
3	(18:0e)	M+H	359.316	C21H43O4	7.395	7.44	7.416	7.4	7.43404	7.43404	7.43404	7.43404	2.89633e+06	1.78776e+06	249070	2.21852e+06
4	(18:1e)	M+H	357.3	C21H41O4	5.578	5.585	5.556	5.598	5.59265	5.59265	5.59265	5.59265	1.71179e+06	4.489e+06	1.01843e+06	1.27641e+06
5	(18:2)	M+NH4	386.29	C21H40O5N	1.422	1.38	1.409	1.387	1.4056	1.4056	1.4056	1.4056	1.47173e+07	3.0069e+06	4.02222e+06	1.14988e+06
6	(18:2e)	M+H	355.284	C21H39O4	4.227	4.207	4.223	4.207	4.212	4.212	4.212	4.212	3.99527e+06	3.00142e+07	2.76999e+06	2.97318e+06
7	(18:4e)	M+H	351.253	C21H35O4	3.897	4.106	4.071	4.108	4.118	4.118	4.118	4.118	1.57456e+06	237007	1.36346e+07	351050
8	(20:3)	M+NH4	412.306	C23H42O5N	1.994	2.00129	2.034	2.00129	1.972	2.00129	2.008	2.00129	4.15173e+06	2.79168e+06	7.18657e+06	3.1886e+06
9	(26:5e)	M+NH4	478.389	C29H52O4N	9.48517	9.506	9.48517	9.52	9.48517	9.489	9.48517	9.525	2.5147e+06	2.77745e+06	2.53997e+06	1.70457e+06
10	(30:0e)	M+Na	549.485	C33H66O4Na	12.938	13.014	12.989	13.014	13.014	13.014	13.015	13.014	2.48719e+07	2.88622e+06	2.82943e+06	1.90632e+07
11	(30:1e)	M+Na	547.47	C33H64O4Na	11.691	11.6955	11.676	11.6955	11.67	11.6955	11.661	11.6955	8.68948e+06	650682	675607	6.56439e+06
12	(30:2e)	M+H	523.472	C33H63O4	10.957	10.9598	10.949	10.9598	10.945	10.9598	10.95	10.9598	1.05702e+07	6.48164e+06	2.88225e+06	7.85587e+06
13	(31:0e)	M+Na	563.501	C34H68O4Na	10.9598	10.988	10.9598	10.996	10.9598	10.965	10.9598	10.983	1.96429e+07	1.00864e+06	856787	1.56716e+07
14	(31:1e)	M+Na	561.485	C34H66O4Na	9.60989	9.612	9.60989	9.618	9.60989	9.632	9.60989	9.596	9.92477e+06	244277	156563	6.49153e+06
15	(31:2e)	M+H	537.488	C34H65O4	15.3057	15.326	15.3057	15.337	15.3057	15.327	15.3057	15.326	1.9038e+07	4.64859e+06	1.56321e+06	1.42186e+07
16	(16:0/16:0)	M+Na	591.496	C35H68O5Na	15.127	15.1178	15.11	15.1178	15.117	15.1178	15.09	15.1178	5.31594e+07	9.60106e+07	3.65922e+07	3.87771e+07
17	(32:0e)	M+Na	577.517	C35H70O4Na	16.316	16.3286	16.313	16.3286	16.307	16.3286	16.34	16.3286	9.04086e+06	8.91292e+06	8.17922e+06	1.27184e+07
18	(16:0/16:1)	M+NH4	584.525	C35H70O5N	10.0095	9.982	10.0095	10.001	10.0095	10.002	10.0095	10.018	1.71803e+07	6.85197e+06	3.66513e+06	9.583e+06
19	(32:1e)	M+Na	575.501	C35H68O4Na	15.488	15.5012	15.484	15.5012	15.497	15.5012	15.496	15.5012	8.71837e+06	8.34116e+06	6.20148e+06	9.23741e+06
20	(14:0/18:2)	M+NH4	582.509	C35H68O5N	14.0094	13.967	14.0094	13.982	14.0094	13.97	14.0094	13.996	1.27099e+07	5.03113e+06	1.47552e+06	6.95304e+06
21	(32:2e)	M+H	551.503	C35H67O4	13.281	13.2729	13.262	13.2729	13.268	13.2729	13.29	13.2729	6.72394e+07	4.21057e+07	1.44254e+07	6.75873e+07
22	(32:3e)	M+H	549.488	C35H65O4	12.1856	12.193	12.1856	12.209	12.1856	12.206	12.1856	12.191	2.39105e+07	2.80866e+06	2.77782e+06	2.07382e+07
23	(33:0)	M+NH4	600.556	C36H74O5N	15.2584	15.253	15.2584	15.252	15.2584	15.26	15.2584	15.249	6.00235e+06	1.49244e+07	681989	1.13306e+06
24	(16:0/17:0)	M+NH4	600.556	C36H74O5N	14.489	14.4804	14.518	14.4804	14.476	14.4804	14.492	14.4804	9.20027e+06	1.45122e+07	1.86491e+07	1.25561e+07
25	(17:1/16:0)	M+Na	603.496	C36H68O5Na	11.636	11.6475	11.638	11.6475	11.653	11.6475	11.66	11.6475	1.68093e+07	9.02694e+06	4.53574e+06	9.32312e+06
26	(15:0/18:2)	M+NH4	596.525	C36H70O5N	12.931	12.9362	12.933	12.9362	12.907	12.9362	13.061	12.9362	1.13028e+07	4.50932e+06	1.21719e+06	5.09426e+06
27	(17:0/17:0)	M+NH4	614.572	C37H76O5N	12.008	12.0199	12.013	12.0199	12.035	12.0199	12.001	12.0199	3.4209e+06	8.9457e+06	206395	616698
28	(18:0/16:0)	M+Na	619.527	C37H72O5Na	14.9455	14.951	14.9455	14.968	14.9455	14.966	14.9455	14.961	2.63525e+07	4.80191e+07	1.50949e+07	2.78271e+07
29	(34:0e)	M+Na	605.548	C37H74O4Na	17.593	17.5893	17.589	17.5893	17.586	17.5893	17.582	17.5893	4.06001e+06	3.6872e+06	2.9947e+06	6.15415e+06
30	(16:0/18:1)	M+Na	617.512	C37H70O5Na	14.554	14.5515	14.556	14.5515	14.526	14.5515	14.563	14.5515	2.66712e+08	1.93214e+08	1.21981e+08	2.41818e+08
31	(34:1e)	M+Na	603.532	C37H72O4Na	14.47	14.4744	14.479	14.4744	14.644	14.4744	14.604	14.4744	6.76726e+06	5.33063e+06	5.23637e+06	8.43517e+06
32	(16:0/18:2)	M+Na	615.496	C37H68O5Na	14.203	14.2311	14.211	14.2311	14.214	14.2311	14.221	14.2311	7.03726e+06	5.26221e+06	2.68621e+06	5.09017e+06
33	(34:2)	M+H	593.514	C37H69O5	11.8921	11.878	11.8921	11.906	11.8921	11.892	11.8921	11.879	3.68298e+06	1.38664e+07	1.84215e+06	1.01878e+06
34	(34:2e)	M+Na	601.517	C37H70O4Na	13.0504	12.961	13.0504	13.075	13.0504	12.961	13.0504	13.045	5.70329e+07	4.87374e+07	1.03801e+07	3.24331e+07
35	(16:1/18:2)	M+NH4	608.525	C37H70O5N	13.1347	13.143	13.1347	13.13	13.1347	13.162	13.1347	13.127	3.36875e+07	1.70014e+07	3.68259e+06	1.50969e+07
36	(16:0/18:3)	M+NH4	608.525	C37H70O5N	11.399	11.399	11.414	11.399	11.4	11.399	11.412	11.399	6.01642e+07	2.66608e+07	5.18133e+06	1.67326e+07
37	(34:3e)	M+Na	599.501	C37H68O4Na	11.389	11.375	11.389	11.386	11.389	11.392	11.389	11.385	2.1552e+07	1.52559e+07	2.887e+07	2.78517e+07
38	(16:1/18:3)	M+NH4	606.509	C37H68O5N	13.178	13.196	13.181	13.196	13.201	13.196	13.198	13.196	8.1672e+06	2.08706e+06	0	761962
39	(34:4e)	M+H	575.503	C37H67O4	13.792	13.7943	13.8	13.7943	13.779	13.7943	13.79	13.7943	8.42507e+06	8.25512e+06	6.2664e+06	9.09845e+06
40	(34:5)	M+NH4	604.494	C37H66O5N	11.1063	11.096	11.1063	11.113	11.1063	11.12	11.1063	11.132	7.60733e+06	2.96835e+06	906653	2.77202e+06
41	(34:5e)	M+H	573.488	C37H65O4	10.6187	10.619	10.6187	10.626	10.6187	10.617	10.6187	10.628	1.87468e+07	597744	521875	9.73499e+06
42	(18:0/17:0)	M+NH4	628.587	C38H78O5N	14.6765	14.694	14.6765	14.685	14.6765	14.687	14.6765	14.695	1.64928e+07	5.52923e+07	1.97756e+06	4.35912e+06
43	(17:0/18:1)	M+NH4	626.572	C38H76O5N	12.8548	12.869	12.8548	12.856	12.8548	12.886	12.8548	12.859	1.12627e+07	1.13886e+07	3.57712e+06	1.06266e+07
44	(17:0/18:2)	M+Na	629.512	C38H70O5Na	15.957	15.9816	15.957	15.9816	15.981	15.9816	15.978	15.9816	6.00071e+07	2.95494e+07	1.21039e+07	3.50845e+07
45	(17:1/18:2)	M+NH4	622.541	C38H72O5N	16.404	16.3963	16.408	16.3963	16.334	16.3963	16.414	16.3963	2.51138e+07	9.92832e+06	2.67874e+06	1.29483e+07
46	(17:0/18:3)	M+NH4	622.541	C38H72O5N	16.7544	16.752	16.7544	16.776	16.7544	16.62	16.7544	16.74	1.15299e+07	4.06117e+06	723373	8.41921e+06
47	(35:4)	M+H	603.498	C38H67O5	15.802	15.7606	15.748	15.7606	15.789	15.7606	15.737	15.7606	1.68093e+07	9.02694e+06	4.53574e+06	9.32312e+06
48	(36:0)	M+H	625.577	C39H77O5	11.583	11.5901	11.593	11.5901	11.608	11.5901	11.603	11.5901	60532.4	91429.4	315143	134956
49	(18:0/18:0)	M+Na	647.558	C39H76O5Na	18.79	18.7599	18.785	18.7599	18.762	18.7599	18.765	18.7599	5.17328e+06	1.09514e+07	1.84679e+06	4.1239e+06
50	(36:0e)	M+Na	633.579	C39H78O4Na	16.285	16.2819	16.273	16.2819	16.275	16.2819	16.267	16.2819	1.32629e+07	1.20229e+06	1.71496e+06	9.83965e+06
51	(18:0/18:1)	M+Na	645.543	C39H74O5Na	13.2931	13.284	13.2931	13.301	13.2931	13.309	13.2931	13.276	6.7269e+07	4.53291e+07	3.8294e+07	7.76314e+07
52	(36:1e)	M+NH4	626.608	C39H80O4N	12.2441	12.258	12.2441	12.26	12.2441	12.26	12.2441	12.282	7.76778e+06	7.46591e+06	7.03313e+06	7.00955e+06
53	(18:1/18:1)	M+Na	643.527	C39H72O5Na	15.956	15.9382	15.917	15.9382	15.924	15.9382	15.916	15.9382	249686626	1.68639e+08	8.82345e+07	2.33826e+08
54	(36:2)	M+H	621.545	C39H73O5	17.295	17.2945	17.299	17.2945	17.284	17.2945	17.288	17.2945	1.35518e+07	2.70503e+07	350869	1.18984e+06
55	(36:2e)	M+Na	629.548	C39H74O4Na	12.8683	12.886	12.8683	12.872	12.8683	12.887	12.8683	12.867	1.70801e+07	1.32632e+07	5.08517e+06	1.02259e+07
56	(18:1/18:2)	M+Na	641.512	C39H70O5Na	12.589	12.5591	12.597	12.5591	12.565	12.5591	12.605	12.5591	1.07767e+08	7.81737e+07	2.34977e+07	7.1464e+07
57	(36:3e)	M+Na	627.532	C39H72O4Na	15.0342	15.136	15.0342	15.098	15.0342	14.785	15.0342	15.104	2.10975e+06	2.49439e+06	1.82175e+06	2.52394e+06
58	(18:2/18:2)	M+NH4	634.541	C39H72O5N	15.355	15.3673	15.37	15.3673	15.381	15.3673	15.336	15.3673	1.24481e+08	7.53664e+07	3.45961e+07	8.91667e+07
59	(36:4e)	M+H	603.535	C39H71O4	13.3658	13.367	13.3658	13.39	13.3658	13.377	13.3658	13.377	6.42631e+06	6.11858e+06	5.91438e+06	7.85876e+06
60	(18:3/18:2)	M+NH4	632.525	C39H70O5N	13.337	13.331	13.309	13.331	13.309	13.331	13.329	13.331	1.29046e+08	5.3013e+07	1.24774e+07	4.00873e+07
61	(18:4/18:1)	M+NH4	632.525	C39H70O5N	12.297	12.539	12.293	12.539	12.298	12.539	12.288	12.539	1.34334e+07	6.66424e+06	1.58443e+06	5.33916e+06
62	(16:0/20:5)	M+H	615.498	C39H67O5	17.4341	17.447	17.4341	17.465	17.4341	17.449	17.4341	17.444	7.03726e+06	5.26221e+06	2.68621e+06	5.09017e+06
63	(36:5e)	M+H	601.519	C39H69O4	9.154	9.159	9.161	9.159	9.159	9.159	9.166	9.159	5.77493e+07	4.86135e+07	1.03203e+07	3.21515e+07
64	(18:3/18:3)	M+NH4	630.509	C39H68O5N	18.501	18.5118	18.501	18.5118	18.515	18.5118	18.496	18.5118	73534.5	332117		130564
65	(16:1/20:5)	M+NH4	630.509	C39H68O5N	17.707	17.7803	17.717	17.7803	17.711	17.7803	17.712	17.7803	2.62369e+07	8.89593e+06	3.24903e+06	1.01251e+07
66	(14:0/22:6)	M+NH4	630.509	C39H68O5N	17.87	17.7803	17.893	17.7803	17.869	17.7803	17.867	17.7803	6.89597e+06	377523	132993	4.27674e+06
67	(36:6e)	M+H	599.503	C39H67O4	16.1214	16.096	16.1214	16.106	16.1214	16.208	16.1214	16.199	3.47091e+07	4.18237e+06	4.19594e+06	1.68479e+07
68	(16:0/21:0)	M+Na	661.574	C40H78O5Na	19.99	19.9564	19.991	19.9564	20.005	19.9564	20.038	19.9564	2.77924e+07	1.41065e+07	2.38032e+07	1.22668e+07
69	(37:0)	M+NH4	656.619	C40H82O5N	14.377	14.328	14.368	14.342	14.3426	14.3426	14.3426	14.3426	3.33218e+07	2.80861e+07	2.95743e+07	2.94511e+07
70	(37:1)	M+NH4	654.603	C40H80O5N	19.834	19.8442	19.839	19.8442	19.862	19.8442	19.84	19.8442	8.80527e+06	2.65638e+07	175374	485462
71	(19:0/18:1)	M+NH4	654.603	C40H80O5N	20.363	20.344	20.346	20.344	20.334	20.344	20.347	20.344	3.77212e+06	2.17276e+06	835774	1.70737e+06
72	(19:0/18:2)	M+NH4	652.587	C40H78O5N	18.246	18.2395	18.234	18.2395	18.247	18.2395	18.244	18.2395	1.72444e+07	9.06543e+06	2.20712e+06	9.24919e+06
73	(19:1/18:2)	M+NH4	650.572	C40H76O5N	17.894	17.9026	17.909	17.9026	17.855	17.9026	17.917	17.9026	1.39597e+07	5.73561e+06	1.81691e+06	6.0646e+06
74	(17:0/20:4)	M+Na	653.512	C40H70O5Na	16.3898	16.388	16.3898	16.376	16.3898	16.407	16.3898	16.378	1.18946e+07	7.0614e+06	2.79691e+06	5.64389e+06
75	(17:0/20:5)	M+NH4	646.541	C40H72O5N	17.6373	17.638	17.6373	17.655	17.6373	17.636	17.6373	17.637	5.66045e+07	2.53899e+07	1.52535e+07	2.45273e+07
76	(37:6)	M+NH4	644.525	C40H70O5N	15.4502	15.47	15.4502	15.453	15.4502	15.473	15.4502	15.462	1.57056e+07	2.84158e+06	2.24981e+06	1.17947e+07
77	(16:0/22:0)	M+NH4	670.634	C41H84O5N	18.921	18.936	18.941	18.954	18.9475	18.9475	18.9475	18.9475	1.2024e+07	6.60553e+06	6.05326e+06	1.62011e+07
78	(16:0/22:1)	M+NH4	668.619	C41H82O5N	18.203	18.119	18.149	18.203	18.1697	18.1697	18.1697	18.1697	8.23172e+06	6.64709e+06	6.61804e+06	5.47798e+06
79	(20:0/18:2)	M+Na	671.558	C41H76O5Na	16.539	16.543	16.543	16.57	16.5428	16.5428	16.5428	16.5428	5.82489e+06	9.99552e+06	2.39504e+06	1.79307e+06
80	(20:1/18:1)	M+NH4	666.603	C41H80O5N	17.26	17.277	17.248	17.301	17.2852	17.2852	17.2852	17.2852	3.09564e+07	2.46337e+07	1.36048e+07	2.45062e+07
81	(18:1/20:2)	M+Na	669.543	C41H74O5Na	16.281	16.265	16.271	16.265	16.2781	16.2781	16.2781	16.2781	4.30269e+07	3.22914e+07	1.78613e+07	3.25345e+07
82	(20:1/18:2)	M+NH4	664.587	C41H78O5N	16.555	16.559	16.566	16.536	16.5552	16.5552	16.5552	16.5552	2.59526e+07	1.32024e+07	3.4131e+06	8.84671e+06
83	(38:3)	M+Na	669.543	C41H74O5Na	16.41	16.416	16.565	16.505	16.5552	16.5552	16.5552	16.5552	1.52523e+07	6.39297e+06	1.97906e+06	5.78422e+06
84	(38:3e)	M+H	633.582	C41H77O4	21.571	21.622	21.566	21.613	21.582	21.582	21.582	21.582	1.32629e+07	1.20229e+06	1.71496e+06	9.83965e+06
85	(20:2/18:2)	M+NH4	662.572	C41H76O5N	15.23	15.266	15.235	15.237	15.2508	15.2508	15.2508	15.2508	8.26212e+07	4.56465e+07	2.35328e+07	3.52857e+07
86	(16:0/22:4)	M+NH4	662.572	C41H76O5N	15.639	15.678	15.687	15.664	15.6718	15.6718	15.6718	15.6718	2.1791e+07	7.35572e+06	3.12171e+06	1.22433e+07
87	(18:0/20:4)	M+Na	667.527	C41H72O5Na	16.064	16.027	15.956	16.053	16.0488	16.0488	16.0488	16.0488	1.12894e+08	1.14092e+08	7.29066e+07	1.3169e+08
88	(18:1/20:4)	M+Na	665.512	C41H70O5Na	14.804	14.806	14.784	14.785	14.7962	14.7962	14.7962	14.7962	4.59614e+07	2.68873e+07	3.2245e+07	5.46472e+07
89	(18:0/20:5)	M+NH4	660.556	C41H74O5N	15.046	15.022	15.039	15.031	15.0567	15.0567	15.0567	15.0567	2.99911e+08	2.11894e+08	1.18239e+08	2.40861e+08
90	(38:5e)	M+H	629.55	C41H73O4	16.249	16.263	16.319	16.257	16.2866	16.2866	16.2866	16.2866	1.62492e+07	1.31106e+07	5.14947e+06	9.82572e+06
91	(18:2/20:4)	M+NH4	658.541	C41H72O5N	13.303	13.298	13.307	13.339	13.3073	13.3073	13.3073	13.3073	3.07502e+07	1.12855e+07	2.61941e+06	7.48927e+06
92	(18:1/20:5)	M+NH4	658.541	C41H72O5N	13.684	13.688	13.678	13.662	13.6813	13.6813	13.6813	13.6813	1.6151e+08	1.13038e+08	5.45562e+07	1.45799e+08
93	(16:0/22:6)	M+NH4	658.541	C41H72O5N	14.288	14.285	14.275	14.299	14.2905	14.2905	14.2905	14.2905	3.25151e+08	1.08605e+08	1.04972e+08	3.63475e+08
94	(38:6e)	M+Na	649.517	C41H70O4Na	15.454	15.462	15.486	15.491	15.484	15.484	15.484	15.484	6.75868e+07	5.28132e+07	2.11336e+07	2.95364e+07
95	(20:5/18:2)	M+H	639.498	C41H67O5	12.587	12.602	12.592	12.614	12.6228	12.6228	12.6228	12.6228	5.39014e+06	3.01685e+06	1.48996e+06	4.1809e+06
96	(16:1/22:6)	M+NH4	656.525	C41H70O5N	12.969	12.942	12.912	12.958	12.9617	12.9617	12.9617	12.9617	2.9444e+07	1.04921e+07	5.12188e+06	2.54286e+07
97	(18:3/20:5)	M+NH4	654.509	C41H68O5N	11.621	11.639	11.596	11.598	11.6114	11.6114	11.6114	11.6114	2.82285e+07	1.01985e+07	4.87088e+06	1.40125e+07
98	(39:0)	M+NH4	684.65	C42H86O5N	18.147	18.185	18.193	18.203	18.1841	18.1841	18.1841	18.1841	6.34364e+07	5.76437e+07	3.02977e+07	841825
99	(16:0/23:0)	M+NH4	684.65	C42H86O5N	19.229	19.232	19.252	19.075	19.2141	19.2141	19.2141	19.2141	1.73959e+06	1.22177e+07	1.22871e+06	693822
100	(18:2/21:0)	M+NH4	680.619	C42H82O5N	17.912	17.92	17.893	17.939	17.9286	17.9286	17.9286	17.9286	4.91185e+06	2.97759e+06	906447	3.40003e+06
101	(39:3)	M+H	661.577	C42H77O5	14.354	14.354	14.335	14.381	14.312	14.312	14.312	14.312	2.38767e+07	1.39322e+07	2.3751e+07	1.1393e+07
102	(39:4)	M+NH4	676.587	C42H78O5N	16.32	16.463	16.319	16.381	16.3169	16.3169	16.3169	16.3169	2.81012e+06	3.28844e+06	474106	2.50253e+06
103	(19:0/20:4)	M+NH4	676.587	C42H78O5N	16.621	16.528	16.543	16.654	16.6441	16.6441	16.6441	16.6441	2.0912e+07	1.10438e+07	2.19903e+06	6.01514e+06
104	(19:0/20:5)	M+NH4	674.572	C42H76O5N	15.639	15.405	15.687	15.487	15.5586	15.5586	15.5586	15.5586	4.64143e+07	2.23454e+07	3.10209e+06	1.13907e+07
105	(39:5)	M+NH4	674.572	C42H76O5N	16.09	16.058	16.103	16.068	16.078	16.078	16.078	16.078	62463.4	42557.7	38015.2	37561.8
106	(17:0/22:6)	M+Na	677.512	C42H70O5Na	14.949	14.847	14.886	14.926	14.9225	14.9225	14.9225	14.9225	8.78766e+06	1.04692e+07	5.59319e+06	1.26693e+07
107	(17:1/22:6)	M+NH4	670.541	C42H72O5N	13.617	13.649	13.648	13.663	13.659	13.659	13.659	13.659	8.15869e+06	1.37971e+06	1.43692e+06	8.64738e+06
108	(16:0/24:0)	M+NH4	698.666	C43H88O5N	19.565	19.48	19.53	19.518	19.53	19.53	19.53	19.53	164916	169597	399032	870299
109	(16:0/24:1)	M+NH4	696.65	C43H86O5N	18.96	18.903	18.869	18.937	18.9183	18.9183	18.9183	18.9183	6.58745e+06	8.25022e+06	3.70818e+06	7.43176e+06
110	(20:5/20:5)	M+NH4	678.509	C43H68O5N	11.279	11.305	11.263	11.286	11.2921	11.2921	11.2921	11.2921	2.79857e+07	1.12702e+07	6.62949e+06	1.96188e+07
111	(18:1/22:1)	M+NH4	694.634	C43H84O5N	18.341	18.122	18.149	18.205	18.1546	18.1546	18.1546	18.1546	1.18004e+07	7.90628e+06	9.17152e+06	8.93757e+06
112	(22:1/18:2)	M+NH4	692.619	C43H82O5N	17.385	17.402	17.353	17.406	17.399	17.399	17.399	17.399	2.52812e+07	1.2171e+07	1.25183e+07	1.63319e+07
113	(18:3/22:1)	M+NH4	690.603	C43H80O5N	16.897	16.885	16.876	16.894	16.8922	16.8922	16.8922	16.8922	4.93074e+06	3.37509e+06	2.15312e+06	1.24161e+07
114	(40:4)	M+NH4	690.603	C43H80O5N	17.184	17.211	17.186	17.22	17.2097	17.2097	17.2097	17.2097	6.24793e+06	8.81768e+06	1.99575e+06	4.661e+06
115	(18:1/22:4)	M+NH4	688.587	C43H78O5N	15.624	15.598	15.67	15.629	15.6305	15.6305	15.6305	15.6305	3.54229e+07	1.85776e+07	1.03645e+07	3.65455e+07
116	(18:0/22:5)	M+Na	693.543	C43H74O5Na	15.995	15.977	15.956	16.029	16.0198	16.0198	16.0198	16.0198	1.11979e+07	6.44287e+06	8.26371e+06	1.33915e+07
117	(22:4/18:2)	M+NH4	686.572	C43H76O5N	14.321	14.312	14.276	14.341	14.252	14.252	14.252	14.252	3.30533e+07	1.05374e+07	9.68724e+06	4.62545e+07
118	(20:2/20:4)	M+NH4	686.572	C43H76O5N	14.807	14.803	14.808	14.82	14.8149	14.8149	14.8149	14.8149	5.62232e+07	2.87186e+07	1.56269e+07	5.35037e+07
119	(18:1/22:5)	M+NH4	686.572	C43H76O5N	15.624	15.52	15.485	15.627	15.5842	15.5842	15.5842	15.5842	1.79274e+08	9.21171e+07	7.84645e+07	2.60036e+08
120	(40:6)	M+Na	691.527	C43H72O5Na	15.625	15.52	15.508	15.625	15.5842	15.5842	15.5842	15.5842	8.74608e+07	4.62037e+07	5.76227e+07	1.41647e+08
121	(22:5/18:2)	M+NH4	684.556	C43H74O5N	13.647	13.68	13.647	13.663	13.6664	13.6664	13.6664	13.6664	3.25402e+07	1.20946e+07	4.5719e+06	3.10787e+07
122	(18:1/22:6)	M+NH4	684.556	C43H74O5N	14.321	14.306	14.276	14.339	14.3179	14.3179	14.3179	14.3179	2.95817e+08	1.0533e+08	8.65382e+07	4.01817e+08
123	(18:2/22:6)	M+NH4	682.541	C43H72O5N	13.212	13.19	13.174	13.181	13.1959	13.1959	13.1959	13.1959	2.76306e+08	9.51531e+07	6.71734e+07	345505842
124	(20:5/20:4)	M+NH4	680.525	C43H70O5N	12.184	12.203	12.223	12.194	12.2019	12.2019	12.2019	12.2019	6.83258e+07	2.24303e+07	7.39034e+06	4.37908e+07
125	(41:0)	M+NH4	712.681	C44H90O5N	18.875	18.867	18.893	18.912	18.8999	18.8999	18.8999	18.8999	1.66152e+06	5.58564e+06	2.34796e+06	472685
126	(41:1)	M+NH4	710.666	C44H88O5N	19.253	19.24	19.259	19.26	19.248	19.248	19.248	19.248	838322	1.77489e+06	901220	1.5526e+06
127	(18:2/23:0)	M+NH4	708.65	C44H86O5N	18.697	18.676	18.704	18.708	18.7042	18.7042	18.7042	18.7042	6.05733e+06	3.1459e+06	996952	4.63772e+06
128	(19:0/22:6)	M+NH4	700.587	C44H78O5N	16.243	16.081	16.078	16.258	16.2365	16.2365	16.2365	16.2365	1.2017e+07	2.53152e+06	1.53693e+06	1.03134e+07
129	(19:1/22:6)	M+NH4	698.572	C44H76O5N	14.988	14.952	14.959	15.003	14.9662	14.9662	14.9662	14.9662	8.24392e+06	1.37273e+06	1.12413e+06	7.16056e+06
130	(18:1/24:0)	M+NH4	724.681	C45H90O5N	19.565	19.48	19.533	19.557	19.5396	19.5396	19.5396	19.5396	2.54626e+06	3.1655e+06	1.08714e+06	3.86522e+06
131	(20:5/22:6)	M+NH4	704.525	C45H70O5N	11.834	11.829	11.805	11.822	11.8457	11.8457	11.8457	11.8457	1.06023e+08	3.02451e+07	2.92966e+07	1.11851e+08
132	(18:1/24:1)	M+Na	727.621	C45H84O5Na	18.872	18.853	18.872	18.904	18.8641	18.8641	18.8641	18.8641	2.67135e+06	5.63687e+06	2.18348e+06	5.9281e+06
133	(18:1/24:2)	M+NH4	720.65	C45H86O5N	18.202	18.247	18.224	18.206	18.2269	18.2269	18.2269	18.2269	3.82772e+07	2.70381e+07	6.20379e+06	3.85064e+07
134	(42:3)	M+Na	725.605	C45H82O5Na	18.202	18.249	18.185	18.205	18.2269	18.2269	18.2269	18.2269	1.17117e+07	1.19068e+07	3.19187e+06	1.53792e+07
135	(24:2/18:2)	M+NH4	718.634	C45H84O5N	17.457	17.455	17.43	17.466	17.4604	17.4604	17.4604	17.4604	1.50437e+07	1.36396e+07	2.14088e+06	1.15387e+07
136	(42:4)	M+NH4	718.634	C45H84O5N	18.126	18.12	18.138	18.11	18.1133	18.1133	18.1133	18.1133	3.03482e+06	3.94324e+06	894582	2.33775e+06
137	(42:5)	M+NH4	716.619	C45H82O5N	17.139	17.13	17.149	17.158	17.154	17.154	17.154	17.154	3.44202e+06	3.96768e+06	1.55624e+06	2.26667e+06
138	(22:0/20:5)	M+NH4	716.619	C45H82O5N	17.498	17.456	17.438	17.464	17.5098	17.5098	17.5098	17.5098	3.66592e+06	2.59948e+06	497806	2.77267e+06
139	(20:0/22:6)	M+Na	719.558	C45H76O5Na	15.76	15.764	15.702	15.778	15.7221	15.7221	15.7221	15.7221	4.35708e+06	5.48159e+06	4.47205e+06	3.53171e+06
140	(20:1/22:5)	M+NH4	714.603	C45H80O5N	16.002	16.006	15.9	16.032	16.0182	16.0182	16.0182	16.0182	2.05282e+06	544847	844669	2.61037e+06
141	(42:6)	M+NH4	714.603	C45H80O5N	16.328	16.357	16.316	16.349	16.3406	16.3406	16.3406	16.3406	9.56641e+06	5.3916e+06	3.227e+06	4.07869e+06
142	(20:1/22:6)	M+NH4	712.587	C45H78O5N	15.57	15.518	15.487	15.562	15.5606	15.5606	15.5606	15.5606	4.19807e+07	1.03697e+07	1.27565e+07	3.48969e+07
143	(42:7)	M+Na	717.543	C45H74O5Na	15.57	15.566	15.556	15.54	15.5606	15.5606	15.5606	15.5606	1.56582e+07	1.82252e+07	6.3819e+06	1.88016e+07
144	(20:2/22:6)	M+NH4	710.572	C45H76O5N	14.439	14.385	14.369	14.447	14.4322	14.4322	14.4322	14.4322	2.64129e+07	9.81251e+06	5.09992e+06	2.41003e+07
145	(43:0)	M+NH4	740.713	C46H94O5N	19.557	19.494	19.562	19.558	19.4911	19.4911	19.4911	19.4911	428207	108994	1.58443e+06	533986
146	(26:1/18:1)	M+NH4	750.697	C47H92O5N	19.476	19.474	19.46	19.459	19.4665	19.4665	19.4665	19.4665	7.16057e+06	5.55446e+06	2.19887e+06	1.01175e+07
147	(26:1/18:2)	M+NH4	748.681	C47H90O5N	18.937	18.934	18.924	18.921	18.903	18.903	18.903	18.903	1.89459e+07	1.28018e+07	2.69056e+06	2.07638e+07
148	(44:4)	M+NH4	746.666	C47H88O5N	18.308	18.266	18.312	18.296	18.294	18.294	18.294	18.294	1.03941e+07	8.40253e+06	1.28842e+06	7.65492e+06
149	(24:0/20:4)	M+NH4	746.666	C47H88O5N	18.882	18.884	18.871	18.904	18.8614	18.8614	18.8614	18.8614	2.59273e+06	3.60227e+06	554508	2.61704e+06
150	(24:1/20:4)	M+NH4	744.65	C47H86O5N	18.059	18.037	18.026	18.06	18.042	18.042	18.042	18.042	5.17718e+06	1.15526e+07	1.28964e+06	5.51518e+06
151	(44:5)	M+NH4	744.65	C47H86O5N	18.371	18.43	18.344	18.328	18.3765	18.3765	18.3765	18.3765	3.63637e+06	3.08813e+06	890560	3.59821e+06
152	(24:1/20:5)	M+NH4	742.634	C47H84O5N	17.415	17.389	17.32	17.427	17.3723	17.3723	17.3723	17.3723	9.30825e+06	1.42517e+07	2.29993e+06	7.97275e+06
153	(44:6)	M+NH4	742.634	C47H84O5N	17.827	17.804	17.736	17.826	17.8333	17.8333	17.8333	17.8333	3.92753e+06	1.00134e+06	334486	4.17081e+06
154	(44:7)	M+NH4	740.619	C47H82O5N	16.458	16.377	16.311	16.434	16.341	16.341	16.341	16.341	2.39584e+06	5.1487e+06	272991	1.42198e+06
155	(22:1/22:6)	M+NH4	740.619	C47H82O5N	16.744	16.738	16.687	16.776	16.7563	16.7563	16.7563	16.7563	1.14825e+07	2.61956e+06	3.9404e+06	5.88152e+06
156	(46:5)	M+NH4	772.681	C49H90O5N	18.78	18.797	18.758	18.789	18.7758	18.7758	18.7758	18.7758	2.30045e+06	3.15115e+06	395855	2.37956e+06
157	(26:1/20:5)	M+NH4	770.666	C49H88O5N	18.263	18.193	18.071	18.296	18.0829	18.0829	18.0829	18.0829	2.53226e+06	5.4304e+06	668172	2.11897e+06
158	(24:1/22:6)	M+NH4	768.65	C49H86O5N	17.715	17.641	17.629	17.707	17.7217	17.7217	17.7217	17.7217	2.77332e+06	1.33465e+06	582835	3.55171e+06
159	(49:1)	M+NH4	822.791	C52H104O5N	21.55	21.527	21.547	21.537	21.513	21.513	21.513	21.513	9.63653e+06	1.46739e+06	159769	1.15514e+06
160	(50:1)	M+NH4	836.807	C53H106O5N	21.699	21.705	21.702	21.7	21.6995	21.6995	21.6995	21.6995	1.76178e+07	6.47901e+06	1.2107e+06	6.24337e+06
161	(50:2)	M+NH4	834.791	C53H104O5N	21.369	21.361	21.337	21.374	21.37	21.37	21.37	21.37	4.89482e+07	4.06896e+06	1.47315e+06	2.00077e+07
162	(50:3)	M+NH4	832.775	C53H102O5N	20.675	20.727	20.691	20.794	20.7055	20.7055	20.7055	20.7055	9.52243e+07	9.2791e+06	606926	7.64377e+06
163	(51:1)	M+NH4	850.822	C54H108O5N	21.596	21.608	21.589	21.609	21.599	21.599	21.599	21.599	8.56769e+07	4.88259e+06	578885	7.83457e+06
164	(51:2)	M+NH4	848.807	C54H106O5N	21.196	21.217	21.289	21.29	21.202	21.202	21.202	21.202	7.58137e+07	6.36661e+06	357416	3.99097e+06
165	(51:3)	M+NH4	846.791	C54H104O5N	21.188	21.194	21.198	21.177	21.1928	21.1928	21.1928	21.1928	3.19925e+07	1.4348e+06	140381	3.64041e+06
166	(52:0)	M+NH4	866.854	C55H112O5N	22.079	22.089	22.068	22.089	22.085	22.085	22.085	22.085	3.3439e+07	1.4646e+07	1.13192e+06	8.27246e+06
167	(52:1)	M+NH4	864.838	C55H110O5N	21.752	21.757	21.757	21.76	21.772	21.772	21.772	21.772	2.26762e+08	1.82868e+07	4.24744e+06	5.73904e+07
168	(52:2)	M+NH4	862.822	C55H108O5N	21.452	21.468	21.435	21.473	21.453	21.453	21.453	21.453	3.43105e+08	2.94857e+07	4.08234e+06	6.22713e+07
169	(52:3)	M+NH4	860.807	C55H106O5N	21.083	21.108	21.096	21.107	21.098	21.098	21.098	21.098	2.74864e+08	3.08657e+07	2.39602e+06	2.5488e+07
170	(53:1)	M+NH4	878.854	C56H112O5N	21.907	21.887	21.898	21.916	21.902	21.902	21.902	21.902	5.33107e+07	3.03625e+06	873112	5.7032e+06
171	(53:2)	M+NH4	876.838	C56H110O5N	21.574	21.574	21.582	21.607	21.582	21.582	21.582	21.582	7.16865e+07	6.11143e+06	495579	5.67342e+06
172	(53:3)	M+NH4	874.822	C56H108O5N	21.291	21.372	21.273	21.29	21.262	21.262	21.262	21.262	5.34314e+07	6.26763e+06	90530.9	2.92473e+06
173	(55:2)	M+NH4	904.869	C58H114O5N	21.925	21.927	21.895	21.923	21.954	21.954	21.954	21.954	3.52347e+07	2.38727e+06	165814	2.48561e+06
TG
1	(4:0/6:0/10:1)	M+NH4	430.316	C23H44O6N	3.854	3.858	3.755	3.858	3.756	3.858	3.774	3.858	4.64064e+06	2.02511e+06	3.31081e+06	1.25994e+06
2	(11:0/6:0/6:0)	M+Na	479.334	C26H48O6Na	12.351	12.3682	12.366	12.3682	12.372	12.3682	12.359	12.3682	283096	586028	433863	278263
3	(8:0/10:3/10:4)	M+NH4	530.348	C31H48O6N	13.7779	13.786	13.7779	13.81	13.7779	13.803	13.7779	13.796	1.81469e+06	1.25548e+06	462162	1.00414e+06
4	(4:0/14:0/16:0)	M+NH4	628.551	C37H74O6N	11.158	11.1191	11.126	11.1191	11.125	11.1191	11.115	11.1191	2.82733e+06	366321	80689.5	594689
5	(18:0e/6:0/10:1)	M+Na	617.512	C37H70O5Na	13.3079	13.332	13.3079	13.325	13.3079	13.315	13.3079	13.331	1.86377e+07	9.52207e+06	2.58176e+06	7.42277e+06
6	(12:1e/6:0/16:0)	M+H	595.53	C37H71O5	15.283	15.283	15.35	15.283	15.274	15.283	15.295	15.283	3.54161e+06	2.10475e+06	942083	3.64074e+06
7	(18:3e/6:0/10:2)	M+NH4	604.494	C37H66O5N	11.465	11.48	11.465	11.473	11.465	11.471	11.465	11.465	1.42894e+07	8.55041e+06	4.52945e+06	4.59572e+06
8	(14:0e/10:3/10:3)	M+NH4	602.478	C37H64O5N	10.873	10.8704	10.882	10.8704	10.852	10.8704	10.893	10.8704	5.40481e+06	2.31845e+06	1.4445e+06	871075
9	(20:0e/6:0/9:0)	M+NH4	628.587	C38H78O5N	15.1849	15.162	15.1849	15.164	15.1849	15.181	15.1849	15.161	1.65114e+07	5.522e+07	1.9161e+06	4.25248e+06
10	(18:0e/6:0/11:1)	M+NH4	626.572	C38H76O5N	12.9484	12.962	12.9484	12.94	12.9484	12.943	12.9484	12.959	1.41215e+07	2.16151e+07	2.50355e+06	2.45426e+06
11	(14:0e/10:1/11:1)	M+NH4	624.556	C38H74O5N	10.4028	10.429	10.4028	10.407	10.4028	10.39	10.4028	10.414	3.74621e+07	3.03225e+07	9.62868e+06	2.82032e+07
12	(14:1e/10:1/11:1)	M+NH4	622.541	C38H72O5N	16.554	16.5529	16.551	16.5529	16.557	16.5529	16.554	16.5529	2.22249e+07	7.7066e+06	2.51894e+06	9.29449e+06
13	(14:0e/10:4/11:4)	M+Na	617.418	C38H58O5Na	13.7695	13.803	13.7695	13.763	13.7695	13.714	13.7695	13.655	0	209283	1.06331e+07	448020
14	(20:0e/8:0/8:0)	M+H	625.577	C39H77O5	12.7518	12.789	12.7518	12.733	12.7518	12.749	12.7518	12.714	1.98697e+07	1.08615e+07	1.0239e+07	9.8848e+06
15	(12:0e/6:0/18:0)	M+H	625.577	C39H77O5	14.273	14.2641	14.271	14.2641	14.259	14.2641	14.285	14.2641	8.94059e+07	7.90436e+07	2.91026e+07	9.65315e+07
16	(36:0e)	M+H	625.577	C39H77O5	12.236	12.2441	12.248	12.2441	12.234	12.2441	12.232	12.2441	1.22645e+07	8.54761e+07	1.61426e+08	1.40025e+07
17	(18:0e/9:0/9:0)	M+NH4	642.603	C39H80O5N	12.6654	12.699	12.6654	12.71	12.6654	12.715	12.6654	12.714	5.57117e+06	1.06766e+07	979019	1.44909e+06
18	(9:0/9:0/18:1)	M+NH4	654.567	C39H76O6N	9.709	9.69295	9.686	9.69295	9.689	9.69295	9.698	9.69295	8.60758e+06	1.18679e+06	130613	1.87992e+06
19	(12:0e/6:0/18:1)	M+NH4	640.587	C39H78O5N	17.095	17.0932	17.083	17.0932	17.074	17.0932	17.078	17.0932	8.81537e+06	1.04178e+07	5.28986e+06	9.91881e+06
20	(8:0/10:0/18:2)	M+NH4	652.551	C39H74O6N	14.3196	14.398	14.3196	14.262	14.3196	14.19	14.3196	14.248	1.10449e+07	865425	246435	1.80268e+06
21	(36:2e)	M+Na	643.527	C39H72O5Na	16.382	16.3361	16.316	16.3361	16.358	16.3361	16.356	16.3361	9.49244e+06	7.84138e+06	3.3426e+06	8.6383e+06
22	(12:1e/6:0/18:1)	M+NH4	638.572	C39H76O5N	17.296	17.2628	17.232	17.2628	17.288	17.2628	17.259	17.2628	3.47828e+08	2.27616e+08	8.92965e+07	3.04808e+08
23	(20:1e/6:0/10:1)	M+H	621.545	C39H73O5	15.991	15.788	15.892	15.788	15.786	15.788	15.786	15.788	1.41938e+07	2.766e+07	123237	899419
24	(16:0e/10:1/10:1)	M+H	621.545	C39H73O5	17.937	17.9364	17.958	17.9364	17.928	17.9364	18.023	17.9364	3.22515e+07	1.05199e+08	1.32245e+06	1.90462e+06
25	(12:1e/6:0/18:2)	M+H	619.53	C39H71O5	12.86	12.8683	12.853	12.8683	12.853	12.8683	12.864	12.8683	1.58644e+07	1.08616e+07	1.82514e+06	7.34994e+06
26	(12:0e/6:0/18:3)	M+NH4	636.556	C39H74O5N	14.096	14.089	14.077	14.089	14.091	14.089	14.081	14.089	7.02338e+07	3.39383e+07	1.08166e+07	3.20469e+07
27	(36:3e)	M+Na	641.512	C39H70O5Na	13.425	13.4342	13.409	13.4342	13.464	13.4342	13.432	13.4342	2.96713e+07	1.44937e+07	4.78058e+06	1.37241e+07
28	(12:1e/6:0/18:3)	M+NH4	634.541	C39H72O5N	16.0373	16.044	16.0373	16.068	16.0373	16.045	16.0373	16.035	1.24481e+08	7.70546e+07	3.45961e+07	8.91667e+07
29	(12:1e/6:0/18:4)	M+NH4	632.525	C39H70O5N	13.325	13.326	13.325	13.325	13.325	13.316	13.325	13.331	1.2687e+07	6.70058e+06	977038	4.11286e+06
30	(14:1e/11:2/11:2)	M+Na	637.48	C39H66O5Na	17.666	17.638	17.632	17.638	17.639	17.638	17.631	17.638	6.81574e+06	5.37992e+06	3.50339e+06	1.13727e+07
31	(18:3e/6:0/12:3)	M+NH4	630.509	C39H68O5N	9.154	9.15721	9.15	9.15721	9.155	9.15721	9.139	9.15721	1.53653e+07	7.95288e+06	1.35554e+06	5.63324e+06
32	(18:0e/9:0/10:0)	M+H	639.592	C40H79O5	18.8823	18.875	18.8823	18.89	18.8823	18.875	18.8823	18.871	4.0866e+07	3.3083e+07	2.4137e+07	4.50993e+07
33	(12:0e/6:0/19:0)	M+H	639.592	C40H79O5	19.613	19.682	19.661	19.682	19.688	19.682	19.862	19.682	2.56568e+07	2.18752e+07	1.74758e+07	2.79292e+07
34	(37:0e)	M+Na	661.574	C40H78O5Na	11.1911	11.197	11.1911	11.182	11.1911	11.194	11.1911	11.187	227507	225367	277306	181988
35	(20:0e/8:0/9:0)	M+H	639.592	C40H79O5	15.8749	15.899	15.8749	15.906	15.8749	15.923	15.8749	15.902	8.09849e+06	1.92465e+06	2.58255e+06	6.84494e+06
36	(18:0e/6:0/13:0)	M+H	639.592	C40H79O5	16.5375	16.639	16.5375	16.604	16.5375	16.621	16.5375	16.604	1.61103e+06	891311	793702	1.07603e+06
37	(16:2e/10:4/11:4)	M+Na	641.418	C40H58O5Na	15.5397	15.556	15.5397	15.555	15.5397	15.554	15.5397	15.531	1.20089e+06	1.68854e+06	2.30117e+06	1.5062e+06
38	(20:0e/6:0/11:1)	M+NH4	654.603	C40H80O5N	15.517	15.694	15.507	15.471	15.509	15.509	15.509	15.509	8.9635e+06	2.67685e+07	211967	361201
39	(37:2e)	M+NH4	652.587	C40H78O5N	19.518	19.4864	19.416	19.4864	19.419	19.4864	19.525	19.4864	2.71807e+06	8.08115e+06	917562	387317
40	(14:0e/11:1/12:1)	M+Na	657.543	C40H74O5Na	15.7541	15.763	15.7541	15.746	15.7541	15.783	15.7541	15.764	1.31668e+07	6.88472e+06	1.94265e+06	8.58451e+06
41	(16:1e/10:1/11:1)	M+Na	655.527	C40H72O5Na	18.3007	18.315	18.3007	18.309	18.3007	18.324	18.3007	18.32	8.1894e+06	4.70748e+06	1.63561e+06	3.70266e+06
42	(20:0e/6:0/11:4)	M+NH4	648.556	C40H74O5N	14.328	14.3184	14.333	14.3184	14.31	14.3184	14.33	14.3184	3.23904e+07	2.24831e+07	8.47169e+06	1.48458e+07
43	(14:0e/11:2/12:3)	M+NH4	646.541	C40H72O5N	18.452	18.4537	18.464	18.4537	18.432	18.4537	18.467	18.4537	4.40465e+07	2.48616e+07	1.63285e+07	2.23559e+07
44	(17:1/10:3/10:4)	M+Na	659.428	C40H60O6Na	15.377	15.3782	15.374	15.3782	15.36	15.3782	15.376	15.3782	2.2841e+06	3.13334e+06	3.89314e+06	2.75867e+06
45	(38:0e)	M+NH4	670.634	C41H84O5N	16.145	16.081	16.219	16.137	16.223	16.223	16.223	16.223	1.45163e+06	1.17494e+07	5.12426e+06	8.67977e+06
46	(18:4/10:3/10:3)	M+NH4	664.457	C41H62O6N	11.621	11.64	11.594	11.599	11.619	11.619	11.619	11.619	1.22128e+06	1.32811e+06	1.19602e+06	2.5884e+06
47	(10:0/10:1/18:1)	M+NH4	680.582	C41H78O6N	12.631	12.63	12.59	12.63	12.6213	12.6213	12.6213	12.6213	5.71265e+06	298132	102004	1.1171e+06
48	(12:1e/6:0/20:1)	M+NH4	666.603	C41H80O5N	12.969	12.942	12.912	12.958	12.974	12.974	12.974	12.974	3.95928e+07	2.50508e+07	1.36589e+07	2.34632e+07
49	(18:1/10:1/10:1)	M+NH4	678.567	C41H76O6N	16.242	16.215	16.229	16.232	16.2363	16.2363	16.2363	16.2363	9.23108e+06	189997	1.00481e+06	2.79641e+06
50	(12:0e/6:0/20:3)	M+H	647.561	C41H75O5	13.685	13.688	13.678	13.662	13.6773	13.6773	13.6773	13.6773	2.99401e+06	2.40739e+06	2.97319e+06	734600
51	(20:1e/6:0/12:2)	M+H	647.561	C41H75O5	17.26	17.281	17.217	17.301	17.2732	17.2732	17.2732	17.2732	1.61929e+07	1.56492e+06	5.17863e+07	7.18135e+07
52	(12:0e/6:0/20:4)	M+NH4	662.572	C41H76O5N	14.776	14.756	14.709	14.785	14.7714	14.7714	14.7714	14.7714	2.78736e+08	2.78607e+08	1.2648e+08	2.39155e+08
53	(12:1e/6:0/20:3)	M+H	645.545	C41H73O5	16.692	16.608	16.495	16.536	16.5302	16.5302	16.5302	16.5302	6.73203e+07	4.59295e+07	3.84265e+07	7.7635e+07
54	(12:1e/6:0/20:4)	M+NH4	660.556	C41H74O5N	17.26	17.131	16.933	17.157	17.157	17.157	17.157	17.157	1.65799e+08	1.36272e+08	7.68974e+07	1.78043e+08
55	(12:0e/6:0/20:5)	M+H	643.53	C41H71O5	16.06	16.055	16.046	16.057	16.0236	16.0236	16.0236	16.0236	249686626	1.68639e+08	8.82345e+07	2.3202e+08
56	(12:1e/6:0/20:5)	M+NH4	658.541	C41H72O5N	15.803	15.797	15.827	15.823	15.8105	15.8105	15.8105	15.8105	1.62072e+08	1.14579e+08	6.43017e+07	1.55157e+08
57	(16:0e/10:3/12:4)	M+NH4	656.525	C41H70O5N	16.871	17.115	16.852	16.845	16.8622	16.8622	16.8622	16.8622	1.55206e+08	7.80024e+07	4.35426e+07	1.17799e+08
58	(18:0e/10:3/10:4)	M+NH4	656.525	C41H70O5N	17.261	17.279	17.247	17.301	17.2686	17.2686	17.2686	17.2686	2.9444e+07	1.04921e+07	5.12188e+06	2.54286e+07
59	(14:1e/10:3/14:4)	M+NH4	654.509	C41H68O5N	17.534	17.553	17.564	17.771	17.565	17.565	17.565	17.565	2.81926e+07	1.01484e+07	4.81092e+06	1.38756e+07
60	(18:3/10:4/11:4)	M+H	659.431	C42H59O6	3.059	3.078	3.031	3.089	3.08296	3.08296	3.08296	3.08296	2.2841e+06	3.13334e+06	3.89314e+06	2.75867e+06
61	(39:5e)	M+NH4	674.572	C42H76O5N	15.639	15.405	15.687	15.486	15.603	15.603	15.603	15.603	4.10008e+07	2.12816e+07	4.45805e+06	1.09882e+07
62	(16:0/8:0/16:0)	M+H	695.618	C43H83O6	12.184	12.203	12.223	12.194	12.1923	12.1923	12.1923	12.1923	7.33125e+06	1.63006e+07	1.8805e+07	0
63	(18:0/11:1/11:1)	M+H	691.587	C43H79O6	15.658	15.696	15.698	15.696	15.68	15.68	15.68	15.68	4.30081e+06	2.81688e+06	232442	2.15596e+06
64	(16:0e/6:0/18:2)	M+NH4	694.634	C43H84O5N	13.212	13.19	13.174	13.181	13.1963	13.1963	13.1963	13.1963	1.56812e+07	9.3756e+06	8.84927e+06	8.85797e+06
65	(16:1e/6:0/18:2)	M+NH4	692.619	C43H82O5N	16.281	16.265	16.271	16.265	16.2437	16.2437	16.2437	16.2437	2.52879e+07	1.21939e+07	1.25185e+07	1.6337e+07
66	(18:1e/11:1/11:1)	M+H	675.592	C43H79O5	16.41	16.416	16.565	16.505	16.5779	16.5779	16.5779	16.5779	1.68574e+06	6.30502e+06	115504	1.36385e+06
67	(4:0/18:2/18:2)	M+H	687.556	C43H75O6	13.647	13.68	13.647	13.663	13.665	13.665	13.665	13.665	1.96119e+07	5.287e+06	4.13674e+06	8.002e+06
68	(12:0e/6:0/22:4)	M+NH4	690.603	C43H80O5N	14.949	14.819	14.907	14.963	14.963	14.963	14.963	14.963	9.05085e+06	2.51571e+06	2.44386e+06	9.30693e+06
69	(16:0e/12:2/12:2)	M+H	673.577	C43H77O5	15.624	15.52	15.485	15.627	15.557	15.557	15.557	15.557	2.05576e+06	2.54418e+06	1.12853e+06	727405
70	(14:1e/6:0/20:4)	M+NH4	688.587	C43H78O5N	17.302	17.325	17.138	17.095	17.0942	17.0942	17.0942	17.0942	3.80919e+07	2.66806e+07	1.97428e+07	4.14902e+07
71	(14:0e/6:0/20:5)	M+NH4	688.587	C43H78O5N	16	15.985	15.999	16.031	16.0217	16.0217	16.0217	16.0217	2.36459e+07	1.38102e+07	4.72883e+06	1.78477e+07
72	(12:1e/6:0/22:5)	M+NH4	686.572	C43H76O5N	16.466	16.352	16.352	16.365	16.4213	16.4213	16.4213	16.4213	1.79274e+08	9.09883e+07	9.02396e+07	2.60036e+08
73	(12:0e/10:4/18:2)	M+H	669.545	C43H73O5	17.875	18.051	17.801	17.827	17.797	17.797	17.797	17.797	4.30269e+07	3.22914e+07	1.78613e+07	3.25345e+07
74	(12:0e/6:0/22:6)	M+H	669.545	C43H73O5	17.109	17.096	17.043	17.072	17.0756	17.0756	17.0756	17.0756	1.64659e+07	6.88226e+06	2.04691e+06	6.22471e+06
75	(20:1e/10:3/10:3)	M+NH4	684.556	C43H74O5N	16.897	16.883	16.874	16.894	16.8037	16.8037	16.8037	16.8037	3.25402e+07	1.20946e+07	4.5719e+06	3.10787e+07
76	(12:1e/6:0/22:6)	M+H	667.53	C43H71O5	17.387	17.403	17.354	17.406	17.3804	17.3804	17.3804	17.3804	1.23148e+07	6.15181e+06	2.43871e+06	8.00304e+06
77	(20:1e/10:3/10:4)	M+NH4	682.541	C43H72O5N	19.308	19.55	19.546	19.534	19.558	19.558	19.558	19.558	2.76306e+08	9.51531e+07	6.71734e+07	345505842
78	(16:1e/12:4/12:4)	M+NH4	680.525	C43H70O5N	18.341	18.122	18.15	18.328	18.149	18.149	18.149	18.149	6.83258e+07	2.24303e+07	7.39034e+06	4.37908e+07
79	(12:0e/11:4/18:1)	M+NH4	702.603	C44H80O5N	15.672	15.696	15.671	15.668	15.6728	15.6728	15.6728	15.6728	1.28632e+07	1.4965e+07	700810	1.10057e+06
80	(14:0/14:0/14:0)	M+NH4	740.676	C45H90O6N	5.319	5.315	5.367	5.334	5.34392	5.34392	5.34392	5.34392	6.39741e+06	1.58021e+06	2.46958e+06	8.17484e+06
81	(16:0/10:0/16:1)	M+NH4	738.661	C45H88O6N	15.57	15.518	15.487	15.562	15.5631	15.5631	15.5631	15.5631	4.60913e+06	61320.8	939470	4.54529e+06
82	(18:1e/6:0/18:1)	M+NH4	722.666	C45H88O5N	16.098	16.093	16.092	16.095	16.0846	16.0846	16.0846	16.0846	2.04257e+07	1.57956e+07	5.57779e+06	2.61341e+07
83	(18:1/12:0/12:2)	M+H	717.603	C45H81O6	15.624	15.789	15.693	15.634	15.6823	15.6823	15.6823	15.6823	2.71844e+06	2.05779e+06	244043	1.06161e+06
84	(42:3e)	M+NH4	720.65	C45H86O5N	16.328	16.358	16.315	16.35	16.3387	16.3387	16.3387	16.3387	3.82859e+07	2.70041e+07	6.20228e+06	3.85004e+07
85	(6:0/18:2/18:2)	M+NH4	715.587	C45H79O6	17.148	17.213	17.038	17.024	17.0404	17.0404	17.0404	17.0404	5.81187e+06	3.10958e+06	103539	927744
86	(18:2e/6:0/18:2)	M+NH4	718.634	C45H84O5N	17.457	17.456	17.43	17.466	17.423	17.423	17.423	17.423	1.52587e+07	1.36569e+07	2.07988e+06	1.14557e+07
87	(14:0e/6:0/22:6)	M+NH4	714.603	C45H80O5N	18.203	18.246	18.224	18.205	18.232	18.232	18.232	18.232	1.07552e+07	8.4476e+06	8.11094e+06	1.14181e+07
88	(12:0e/10:1/20:5)	M+NH4	714.603	C45H80O5N	18.876	18.87	18.871	18.86	18.8546	18.8546	18.8546	18.8546	1.21876e+07	4.36244e+06	3.31729e+06	3.60241e+06
89	(16:0/12:3/14:4)	M+H	709.54	C45H73O6	18.956	18.952	18.978	18.959	18.9707	18.9707	18.9707	18.9707	1.56666e+06	1.99681e+06	583054	1.09404e+06
90	(14:1e/6:0/22:6)	M+NH4	712.587	C45H78O5N	19.575	19.579	19.564	19.557	19.5702	19.5702	19.5702	19.5702	4.19807e+07	1.03697e+07	1.27565e+07	3.48969e+07
91	(15:0/14:0/14:0)	M+NH4	754.692	C46H92O6N	18.731	18.698	18.869	18.674	18.7153	18.7153	18.7153	18.7153	4.42636e+06	1.99467e+06	1.32425e+06	2.54666e+06
92	(11:0/14:0/18:1)	M+NH4	752.676	C46H90O6N	19.253	19.341	19.28	19.26	19.2771	19.2771	19.2771	19.2771	6.06674e+06	114264	467442	2.03372e+06
93	(11:0/14:0/18:2)	M+NH4	750.661	C46H88O6N	19.838	19.862	19.835	19.859	19.8305	19.8305	19.8305	19.8305	4.66805e+06	141731	117357	1.1598e+06
94	(16:0/14:0/14:0)	M+NH4	768.708	C47H94O6N	16.743	16.736	16.686	16.776	16.736	16.736	16.736	16.736	2.69913e+07	2.15682e+07	1.56765e+07	2.37192e+07
95	(18:1/12:0/14:0)	M+NH4	766.692	C47H92O6N	13.874	13.865	13.885	13.882	13.8544	13.8544	13.8544	13.8544	3.06122e+07	2.18754e+06	5.05782e+06	2.84419e+07
96	(16:1/12:0/16:1)	M+NH4	764.676	C47H90O6N	17.415	17.391	17.32	17.427	17.3405	17.3405	17.3405	17.3405	2.44941e+07	859145	3.37654e+06	2.1973e+07
97	(20:1e/6:0/18:1)	M+NH4	750.697	C47H92O5N	18.06	18.036	18.026	18.06	18.0332	18.0332	18.0332	18.0332	7.16057e+06	5.55446e+06	2.19887e+06	1.01175e+07
98	(16:0/12:3/16:0)	M+NH4	762.661	C47H88O6N	18.308	18.266	18.311	18.295	18.2974	18.2974	18.2974	18.2974	6.40975e+06	386433	1.56889e+06	3.80229e+06
99	(16:1e/10:1/18:1)	M+NH4	748.681	C47H90O5N	18.502	18.538	18.28	18.583	18.5155	18.5155	18.5155	18.5155	1.89927e+07	1.28022e+07	2.69052e+06	2.07639e+07
100	(18:0/6:0/20:4)	M+Na	765.6	C47H82O6Na	18.939	18.934	18.923	18.904	18.9161	18.9161	18.9161	18.9161	1.06875e+06	910381	1.03723e+06	1.15462e+06
101	(20:2e/6:0/18:2)	M+NH4	746.666	C47H88O5N	19.045	19.04	19.022	19.051	19.0449	19.0449	19.0449	19.0449	1.04359e+07	8.22312e+06	1.19168e+06	7.66718e+06
102	(18:1e/6:0/20:4)	M+NH4	744.65	C47H86O5N	19.476	19.474	19.46	19.459	19.491	19.491	19.491	19.491	5.20833e+06	1.16208e+07	1.28958e+06	5528675
103	(16:1e/8:0/20:5)	M+NH4	742.634	C47H84O5N	19.549	19.566	19.578	19.533	19.5565	19.5565	19.5565	19.5565	1.08085e+07	1.50274e+07	2.4595e+06	9.2129e+06
104	(44:7e)	M+NH4	740.619	C47H82O5N	20.054	20.084	20.087	20.068	20.0725	20.0725	20.0725	20.0725	1.14786e+07	2.58783e+06	3.95919e+06	5.8996e+06
105	(16:0/12:0/17:0)	M+NH4	782.723	C48H96O6N	14.724	14.75	14.733	14.755	14.754	14.754	14.754	14.754	3.84573e+06	650743	1.55757e+06	2.57859e+06
106	(15:0/14:0/16:0)	M+NH4	782.723	C48H96O6N	18.889	18.726	18.853	18.83	18.7368	18.7368	18.7368	18.7368	4.90434e+07	2.15961e+07	8.33891e+06	2.89162e+07
107	(15:0/14:0/16:1)	M+NH4	780.708	C48H94O6N	19.314	19.368	19.316	19.369	19.3395	19.3395	19.3395	19.3395	1.82312e+07	1.65644e+06	1.90493e+06	5.57933e+06
108	(16:1/13:0/16:1)	M+NH4	778.692	C48H92O6N	19.827	19.83	19.854	19.862	19.8408	19.8408	19.8408	19.8408	2.86921e+07	577614	981026	6.65045e+06
109	(11:0/16:1/18:2)	M+NH4	776.676	C48H90O6N	19.844	19.807	19.83	19.859	19.8022	19.8022	19.8022	19.8022	1.06998e+07	164721	210864	1.45116e+06
110	(45:6)	M+H	753.603	C48H81O6	20.301	20.312	20.314	20.31	20.317	20.317	20.317	20.317	4.2371e+06	5.21291e+06	5.70671e+06	6.75966e+06
111	(15:0/15:0/16:0)	M+NH4	796.739	C49H98O6N	21.111	21.101	21.103	21.108	21.1075	21.1075	21.1075	21.1075	1.44401e+08	1.61934e+08	6.18656e+07	1.15204e+08
112	(14:0e/16:0/16:0)	M+NH4	782.76	C49H100O5N	12.72	12.705	12.74	12.725	12.7211	12.7211	12.7211	12.7211	1.40638e+07	5.5902e+06	793194	4.11657e+06
113	(16:0/14:0/16:1)	M+Na	799.679	C49H92O6Na	18.061	18.193	18.071	18.296	18.061	18.061	18.061	18.061	1.7296e+06	2.19707e+06	2.85661e+06	2.12584e+06
114	(16:1/14:0/16:1)	M+NH4	792.708	C49H94O6N	17.846	17.869	18.055	17.894	17.8514	17.8514	17.8514	17.8514	1.36026e+08	6.54108e+06	1.14883e+07	8.18131e+07
115	(14:0/14:0/18:3)	M+NH4	790.692	C49H92O6N	18.47	18.434	18.418	18.483	18.4656	18.4656	18.4656	18.4656	5.49935e+07	887683	4.38723e+06	2.84154e+07
116	(18:1e/10:1/18:1)	M+NH4	776.713	C49H94O5N	18.974	18.996	18.967	18.955	18.9807	18.9807	18.9807	18.9807	4.20589e+06	2.54658e+06	707694	5.11708e+06
117	(10:0/18:2/18:2)	M+NH4	788.676	C49H90O6N	19.029	19.251	19.219	19.07	19.0481	19.0481	19.0481	19.0481	9.73104e+06	229747	1.12085e+06	5.68468e+06
118	(18:1e/10:1/18:2)	M+NH4	774.697	C49H92O5N	20.056	20.047	20.066	20.064	20.0574	20.0574	20.0574	20.0574	5.76e+06	3.63479e+06	550052	4.1754e+06
119	(18:2/10:1/18:2)	M+NH4	786.661	C49H88O6N	19.481	19.476	19.481	19.482	19.4903	19.4903	19.4903	19.4903	2.21088e+06	150717	480369	675454
120	(46:6e)	M+NH4	770.666	C49H88O5N	19.603	19.623	19.605	19.589	19.6073	19.6073	19.6073	19.6073	2.14431e+06	5.78827e+06	536655	1.90858e+06
121	(16:0/10:4/20:5)	M+H	761.571	C49H77O6	20.529	20.555	20.534	20.566	20.5348	20.5348	20.5348	20.5348	2.21688e+08	2.10345e+08	1.42001e+08	1.99655e+08
122	(15:0/16:0/16:0)	M+NH4	810.755	C50H100O6N	20.753	20.75	20.749	20.731	20.7459	20.7459	20.7459	20.7459	2.77303e+08	1.42662e+08	3.63135e+07	1.98058e+08
123	(15:0/16:0/16:1)	M+NH4	808.739	C50H98O6N	11.79	11.807	11.789	11.805	11.796	11.796	11.796	11.796	2.18756e+08	1.51646e+07	1.34483e+07	1.19085e+08
124	(15:0/14:0/18:2)	M+NH4	806.723	C50H96O6N	14.819	14.819	14.806	14.838	14.816	14.816	14.816	14.816	1.82442e+08	5.99367e+06	6.09441e+06	6.98638e+07
125	(11:0/18:1/18:2)	M+NH4	804.708	C50H94O6N	18.262	18.209	18.45	18.246	18.2338	18.2338	18.2338	18.2338	8.57167e+07	1.18057e+06	1.35454e+06	2.03956e+07
126	(11:0/18:2/18:2)	M+NH4	802.692	C50H92O6N	19.028	18.96	18.842	18.83	18.8102	18.8102	18.8102	18.8102	2.70727e+07	62145.9	199746	1.90013e+06
127	(25:1/11:2/11:2)	M+H	783.65	C50H87O6	19.525	19.431	19.488	19.367	19.3684	19.3684	19.3684	19.3684	8.44107e+06	1.52983e+07	5.35077e+06	1.07707e+07
128	(11:0/18:2/18:3)	M+NH4	800.676	C50H90O6N	19.862	19.864	19.866	19.865	19.8734	19.8734	19.8734	19.8734	4.56648e+06	87586.5	18564.8	66567.5
129	(25:1/11:3/11:3)	M+Na	801.6	C50H82O6Na	20.302	20.306	20.309	20.31	20.306	20.306	20.306	20.306	2.67658e+06	4.44208e+06	5.01736e+06	2.25758e+06
130	(16:0e/16:0/16:0)	M+Na	815.746	C51H100O5Na	20.7	20.728	20.735	20.731	20.7094	20.7094	20.7094	20.7094	2.22523e+06	4.98447e+06	503023	706405
131	(16:0/14:0/18:1)	M+Na	827.71	C51H96O6Na	21.488	21.474	21.463	21.456	21.4684	21.4684	21.4684	21.4684	7.23517e+06	1.09269e+07	1.10148e+07	8.7948e+06
132	(14:0e/16:0/18:1)	M+NH4	808.775	C51H102O5N	21.085	21.097	21.078	21.071	21.0886	21.0886	21.0886	21.0886	6.74405e+07	5.94139e+06	1.11961e+06	1.78745e+07
133	(16:1e/16:0/16:0)	M+NH4	808.775	C51H102O5N	21.384	21.385	21.358	21.375	21.3763	21.3763	21.3763	21.3763	1.13981e+07	3.50582e+06	847716	4.10243e+06
134	(16:0/16:1/16:1)	M+Na	825.694	C51H94O6Na	19.62	19.61	19.61	19.617	19.6069	19.6069	19.6069	19.6069	1.24937e+07	6.47136e+06	7.87772e+06	1.31828e+07
135	(20:2e/14:0/14:0)	M+NH4	806.76	C51H100O5N	17.831	17.854	17.825	17.869	17.8379	17.8379	17.8379	17.8379	4.55733e+07	3.74736e+06	659389	1.17132e+07
136	(16:1/16:1/16:1)	M+Na	823.679	C51H92O6Na	18.544	18.319	18.342	18.409	18.3666	18.3666	18.3666	18.3666	9.33769e+06	1.79302e+06	2.2982e+06	6.95856e+06
137	(14:0/14:0/20:3)	M+H	801.697	C51H93O6	19.131	19.24	19.132	19.163	19.1408	19.1408	19.1408	19.1408	133599	1.10665e+07	4.12314e+06	108321
138	(14:1e/16:0/18:2)	M+NH4	804.744	C51H98O5N	20.056	20.047	20.066	20.064	20.0597	20.0597	20.0597	20.0597	1.22392e+07	686636	57642.9	1.79721e+06
139	(12:0/18:2/18:2)	M+Na	821.663	C51H90O6Na	18.747	18.669	18.802	18.674	18.6961	18.6961	18.6961	18.6961	7.08611e+06	183287	629110	3.09806e+06
140	(18:4/14:0/16:0)	M+NH4	816.708	C51H94O6N	18.982	18.989	18.996	19.005	19.0007	19.0007	19.0007	19.0007	7.6919e+07	3.49618e+06	2.4775e+06	2.29381e+07
141	(16:1/14:0/18:3)	M+H	799.681	C51H91O6	19.605	19.706	19.695	19.583	19.6071	19.6071	19.6071	19.6071	1.7296e+06	2.19707e+06	2.85661e+06	2.12584e+06
142	(14:0/14:0/20:5)	M+NH4	814.692	C51H92O6N	20.486	20.561	20.522	20.547	20.547	20.547	20.547	20.547	3.67953e+07	1.98901e+06	2.04718e+06	9.02645e+06
143	(18:1/12:3/18:1)	M+NH4	814.692	C51H92O6N	19.42	19.303	19.431	19.181	19.4276	19.4276	19.4276	19.4276	1.89765e+07	909521	4.12026e+06	1.45785e+07
144	(16:0/12:0/20:5)	M+H	797.665	C51H89O6	20.115	20.111	20.108	20.114	20.1017	20.1017	20.1017	20.1017	3.07254e+06	969798	1.60614e+06	3.17494e+06
145	(18:2/12:2/18:2)	M+NH4	812.676	C51H90O6N	20.511	20.511	20.493	20.536	20.5082	20.5082	20.5082	20.5082	3.17817e+06	5.25258e+06	2.19158e+06	3.08275e+06
146	(16:0/10:0/22:6)	M+NH4	812.676	C51H90O6N	20.421	20.231	20.378	20.369	20.3911	20.3911	20.3911	20.3911	1.0231e+07	2.55941e+06	1.59163e+06	1.13845e+06
147	(16:0/16:0/17:0)	M+NH4	838.786	C52H104O6N	20.819	20.882	20.905	20.827	20.8336	20.8336	20.8336	20.8336	4.76399e+08	2.28804e+08	4.43869e+07	3.27974e+08
148	(49:0e)	M+NH4	824.807	C52H106O5N	21.165	21.177	21.167	21.182	21.1705	21.1705	21.1705	21.1705	2.8303e+07	9.13376e+06	655645	3.11744e+06
149	(16:1/14:0/19:0)	M+NH4	836.77	C52H102O6N	20.345	20.329	20.345	20.345	20.3414	20.3414	20.3414	20.3414	2.32551e+08	1.36385e+07	8.99344e+06	1.26993e+08
150	(15:0/16:0/18:1)	M+Na	841.726	C52H98O6Na	21.55	21.524	21.547	21.537	21.523	21.523	21.523	21.523	1.46381e+07	9.5817e+06	7.58188e+06	1.94964e+07
151	(18:1e/15:0/16:0)	M+NH4	822.791	C52H104O5N	21.1	21.109	21.123	21.07	21.1121	21.1121	21.1121	21.1121	1.05685e+07	1.97621e+06	149167	1.30317e+06
152	(15:0/16:0/18:2)	M+Na	839.71	C52H96O6Na	21.626	21.65	21.622	21.612	21.6145	21.6145	21.6145	21.6145	2.38968e+07	7.44376e+06	5.58039e+06	2.09068e+07
153	(49:2e)	M+NH4	820.775	C52H102O5N	18.619	18.622	18.402	18.609	18.5567	18.5567	18.5567	18.5567	2.45965e+07	3.17529e+06	115066	2.82781e+06
154	(16:1e/15:0/18:1)	M+NH4	820.775	C52H102O5N	19.485	19.437	19.669	19.518	19.4373	19.4373	19.4373	19.4373	1.02645e+07	827500	69841.5	3.09249e+06
155	(15:0/16:1/18:2)	M+Na	837.694	C52H94O6Na	19.273	19.277	19.293	19.139	19.2742	19.2742	19.2742	19.2742	1.35717e+07	2.19705e+06	1.63931e+06	9.90363e+06
156	(15:0/16:0/18:3)	M+H	815.712	C52H95O6	20.011	20.034	20.049	19.867	19.908	19.908	19.908	19.908	1.91822e+06	1.37586e+07	3.82919e+06	4.04309e+06
157	(18:2/13:0/18:2)	M+Na	835.679	C52H92O6Na	20.757	20.745	20.743	20.774	20.76	20.76	20.76	20.76	6.04802e+06	170741	126971	2.47721e+06
158	(18:3/13:0/18:2)	M+NH4	828.708	C52H94O6N	20.346	20.364	20.342	20.344	20.3429	20.3429	20.3429	20.3429	3.60923e+07	708677	1.09339e+06	9.61499e+06
159	(18:3/13:0/18:3)	M+NH4	826.692	C52H92O6N	20.729	20.758	20.712	20.705	20.7296	20.7296	20.7296	20.7296	3.83718e+06	7607.06	50303	521567
160	(16:0/17:0/17:0)	M+NH4	852.801	C53H106O6N	20.325	20.416	20.349	20.339	20.3521	20.3521	20.3521	20.3521	7.84829e+08	5.96303e+08	1.27145e+08	7.30564e+08
161	(18:0e/16:0/16:0)	M+Na	843.778	C53H104O5Na	22.562	22.714	22.574	22.494	22.559	22.559	22.559	22.559	4.18663e+06	5.06721e+06	431110	1.52294e+06
162	(16:1/17:0/17:0)	M+NH4	850.786	C53H104O6N	20.911	20.938	20.906	20.944	20.9316	20.9316	20.9316	20.9316	7.26554e+08	1.05063e+08	7.84466e+07	6.4139e+08
163	(16:0/16:0/18:1)	M+Na	855.741	C53H100O6Na	21.004	21.003	20.695	20.794	20.7528	20.7528	20.7528	20.7528	4.62225e+07	4.273e+07	3.4629e+07	5.37848e+07
164	(18:0/16:0/16:1)	M+NH4	850.786	C53H104O6N	21.045	21.006	21.027	21.033	21.0286	21.0286	21.0286	21.0286	5.75058e+06	1.36028e+07	8.7794e+06	4.37991e+07
165	(18:1e/16:0/16:0)	M+Na	841.762	C53H102O5Na	21.434	21.446	21.436	21.45	21.4468	21.4468	21.4468	21.4468	8.43954e+06	2.5035e+06	453859	2.50549e+06
166	(16:1e/16:0/18:0)	M+NH4	836.807	C53H106O5N	20.876	21.155	21.289	21.122	21.1286	21.1286	21.1286	21.1286	1.75977e+07	6.48745e+06	1.21138e+06	6.29131e+06
167	(16:0/16:0/18:2)	M+Na	853.726	C53H98O6Na	23.011	22.866	23.345	22.861	23.0151	23.0151	23.0151	23.0151	5.61283e+07	4.27207e+07	3.35983e+07	5.76344e+07
168	(16:0/16:1/18:1)	M+NH4	848.77	C53H102O6N	21.101	21.112	21.096	21.145	21.1264	21.1264	21.1264	21.1264	1.67748e+07	1.48509e+06	1.67569e+06	1.17767e+07
169	(18:1/14:0/18:1)	M+NH4	848.77	C53H102O6N	21.802	21.786	21.78	21.797	21.7891	21.7891	21.7891	21.7891	2.75811e+06	556858	140621	1.92758e+06
170	(16:1e/16:0/18:1)	M+NH4	834.791	C53H104O5N	20.577	20.568	20.57	20.566	20.5722	20.5722	20.5722	20.5722	2.27659e+08	1.91276e+07	2.62528e+06	3.4873e+07
171	(16:0/16:0/18:3)	M+Na	851.71	C53H96O6Na	21.061	21.061	21.238	21.313	21.312	21.312	21.312	21.312	3.07865e+07	8.33014e+06	1.18864e+07	3.28659e+07
172	(16:0/14:0/20:3)	M+H	829.728	C53H97O6	21.7	21.705	21.701	21.7	21.7052	21.7052	21.7052	21.7052	6.11373e+06	4.03113e+07	1.20881e+07	9.46008e+06
173	(50:3)	M+NH4	846.755	C53H100O6N	21.322	21.316	21.313	21.297	21.3174	21.3174	21.3174	21.3174	801299	0	0	943867
174	(16:1e/16:0/18:2)	M+NH4	832.775	C53H102O5N	19.131	19.24	19.132	19.163	19.132	19.132	19.132	19.132	1.05233e+08	1.01578e+07	965967	1.21066e+07
175	(16:2e/16:0/18:1)	M+NH4	832.775	C53H102O5N	18.96	18.93	18.842	18.938	18.9681	18.9681	18.9681	18.9681	4.01692e+07	3.55631e+06	926537	1.29545e+07
176	(14:0/18:2/18:2)	M+Na	849.694	C53H94O6Na	19.605	19.706	19.695	19.583	19.5986	19.5986	19.5986	19.5986	2.92123e+07	3.90037e+06	3.63344e+06	2.19727e+07
177	(18:4/16:0/16:0)	M+Na	849.694	C53H94O6Na	20.754	20.753	20.735	20.74	20.74	20.74	20.74	20.74	3.42431e+06	870111	1.71787e+06	3.60923e+06
178	(16:0/14:0/20:4)	M+H	827.712	C53H95O6	18.544	18.521	18.386	18.452	18.4232	18.4232	18.4232	18.4232	7.23517e+06	1.09269e+07	1.10148e+07	8.7948e+06
179	(14:0e/18:2/18:2)	M+NH4	830.76	C53H100O5N	19.196	19.36	19.224	19.22	19.2248	19.2248	19.2248	19.2248	2.55922e+07	2.33146e+06	102284	1.04922e+06
180	(14:0/18:2/18:3)	M+Na	847.679	C53H92O6Na	20.115	20.111	20.108	20.114	20.0901	20.0901	20.0901	20.0901	1.46853e+07	817546	666621	6.87306e+06
181	(16:1/16:1/18:3)	M+H	825.697	C53H93O6	18.442	18.295	18.354	18.425	18.437	18.437	18.437	18.437	1.24937e+07	6.47136e+06	7.87772e+06	1.31828e+07
182	(50:5e)	M+NH4	828.744	C53H98O5N	19.661	19.675	19.651	19.621	19.6655	19.6655	19.6655	19.6655	3.71524e+06	634414	212609	202313
183	(18:3/10:1/22:2)	M+NH4	840.708	C53H94O6N	19.844	19.83	19.937	19.927	19.9387	19.9387	19.9387	19.9387	1.52927e+06	335939	408295	619091
184	(14:0/18:3/18:3)	M+Na	845.663	C53H90O6Na	20.511	20.511	20.493	20.536	20.501	20.501	20.501	20.501	6.88383e+06	467537	612755	1.54266e+06
185	(16:1/14:0/20:5)	M+H	823.681	C53H91O6	20.091	20.11	20.111	20.114	20.0961	20.0961	20.0961	20.0961	9.33769e+06	1.78263e+06	2.2822e+06	6.95856e+06
186	(50:6e)	M+Na	831.684	C53H92O5Na	20.988	20.969	20.975	20.983	20.98	20.98	20.98	20.98	0	3.6427e+06	996341	198775
187	(12:0/18:2/20:5)	M+NH4	838.692	C53H92O6N	20.259	20.25	20.24	20.242	20.2219	20.2219	20.2219	20.2219	2.43897e+07	487055	842446	2.7574e+06
188	(18:2/14:3/18:2)	M+H	821.665	C53H89O6	20.58	20.57	20.581	20.614	20.5763	20.5763	20.5763	20.5763	7.07525e+06	183287	618777	3.09276e+06
189	(17:0/17:0/17:0)	M+NH4	866.817	C54H108O6N	20.381	20.612	20.445	20.462	20.4027	20.4027	20.4027	20.4027	4.65373e+08	6.76473e+07	1.93755e+07	2.47825e+08
190	(16:0/16:0/19:0)	M+Na	871.773	C54H104O6Na	20.731	20.739	20.743	20.697	20.7192	20.7192	20.7192	20.7192	4.20651e+06	1.24487e+07	2.33503e+06	9.64556e+06
191	(51:0e)	M+NH4	852.838	C54H110O5N	20.818	21.037	21.024	20.794	20.805	20.805	20.805	20.805	2.38268e+07	8.09801e+06	852800	3.82305e+06
192	(19:1/16:0/16:0)	M+NH4	864.801	C54H106O6N	21.095	21.106	21.11	21.108	21.0942	21.0942	21.0942	21.0942	5.47916e+08	5.02349e+07	2.06567e+07	3.45487e+08
193	(16:0/17:0/18:1)	M+Na	869.757	C54H102O6Na	20.795	20.898	20.889	20.878	20.8806	20.8806	20.8806	20.8806	2.44793e+07	1.2819e+07	8.60085e+06	3.03804e+07
194	(51:1e)	M+NH4	850.822	C54H108O5N	21.188	21.194	21.198	21.177	21.1876	21.1876	21.1876	21.1876	8.10458e+07	5.30699e+06	668626	9.36052e+06
195	(17:0/17:1/17:1)	M+NH4	862.786	C54H104O6N	20.293	20.288	20.274	20.235	20.04	20.04	20.04	20.04	5.46121e+07	6.59812e+06	2.68124e+06	3.30223e+07
196	(16:1/16:1/19:0)	M+NH4	862.786	C54H104O6N	20.348	20.363	20.348	20.343	20.3328	20.3328	20.3328	20.3328	3.36664e+08	1.68781e+07	8.24099e+06	1.92759e+08
197	(15:0/18:1/18:1)	M+Na	867.741	C54H100O6Na	21.474	21.469	21.475	21.462	21.4681	21.4681	21.4681	21.4681	3.91079e+07	1.12533e+07	8.31732e+06	3.75453e+07
198	(51:2e)	M+NH4	848.807	C54H106O5N	21.243	21.333	21.289	21.29	21.2289	21.2289	21.2289	21.2289	7.37369e+07	6.59069e+06	369190	1.47151e+06
199	(16:1e/16:0/19:1)	M+NH4	848.807	C54H106O5N	21.512	21.506	21.499	21.507	21.5056	21.5056	21.5056	21.5056	3.11354e+07	1.33777e+06	232013	5.01914e+06
200	(16:0/17:1/18:2)	M+Na	865.726	C54H98O6Na	20.705	20.73	20.607	20.7	20.7015	20.7015	20.7015	20.7015	3.76141e+07	6.0662e+06	4.4311e+06	3.00781e+07
201	(51:3e)	M+NH4	846.791	C54H104O5N	21.597	21.608	21.59	21.609	21.5911	21.5911	21.5911	21.5911	1.63483e+07	3.04539e+06	61463.1	577662
202	(18:1e/15:0/18:2)	M+NH4	846.791	C54H104O5N	21.084	21.109	20.969	20.965	21.0042	21.0042	21.0042	21.0042	3.16136e+07	1.44909e+06	140381	3.63483e+06
203	(15:0/18:2/18:2)	M+Na	863.71	C54H96O6Na	21.921	21.916	21.93	21.917	21.913	21.913	21.913	21.913	2.55391e+07	2.81376e+06	1.90735e+06	1.62528e+07
204	(15:0/16:0/20:4)	M+H	841.728	C54H97O6	19.14	19.14	19.151	19.138	19.1447	19.1447	19.1447	19.1447	1.41307e+07	8.94274e+06	7.45411e+06	1.8813e+07
205	(51:4e)	M+NH4	844.775	C54H102O5N	19.902	19.872	20.049	19.868	19.9028	19.9028	19.9028	19.9028	1.00186e+07	210616	50400.1	194547
206	(15:0/18:2/18:3)	M+Na	861.694	C54H94O6Na	18.865	18.759	18.869	18.788	18.7569	18.7569	18.7569	18.7569	1.56229e+07	969405	529058	5.74035e+06
207	(15:0/16:0/20:5)	M+H	839.712	C54H95O6	19.555	19.714	19.594	19.526	19.5523	19.5523	19.5523	19.5523	2.45338e+07	7.43833e+06	5.58016e+06	2.0911e+07
208	(18:2e/15:0/18:3)	M+NH4	842.76	C54H100O5N	20.345	20.364	20.34	20.345	20.3645	20.3645	20.3645	20.3645	9.04575e+06	711406	45953.7	233853
209	(15:0/18:3/18:3)	M+Na	859.679	C54H92O6Na	19.904	19.922	19.92	19.925	19.9195	19.9195	19.9195	19.9195	6.04764e+06	3.00639e+06	933972	3.74399e+06
210	(15:0/16:1/20:5)	M+H	837.697	C54H93O6	20.732	20.757	20.712	20.705	20.73	20.73	20.73	20.73	1.29132e+07	1.62295e+06	747726	4.73557e+06
211	(20:5/13:0/18:2)	M+NH4	852.708	C54H94O6N	20.347	20.365	20.341	20.346	20.3423	20.3423	20.3423	20.3423	1.80111e+07	39597.8	184592	3.08915e+06
212	(15:0/16:0/21:0)	M+NH4	880.833	C55H110O6N	20.349	20.538	20.541	20.385	20.2889	20.2889	20.2889	20.2889	5.25673e+08	9.37153e+07	6.3217e+07	4.62553e+08
213	(20:0e/16:0/16:0)	M+NH4	866.854	C55H112O5N	20.58	20.554	20.561	20.537	20.5523	20.5523	20.5523	20.5523	3.3439e+07	1.4646e+07	1.13192e+06	8.27246e+06
214	(19:1/16:0/17:0)	M+NH4	878.817	C55H108O6N	21.434	21.446	21.434	21.45	21.449	21.449	21.449	21.449	1.10189e+09	1.23437e+08	9.23777e+07	8.92863e+08
215	(18:0/16:0/18:1)	M+Na	883.773	C55H104O6Na	21.036	21.029	21.032	21.055	21.0857	21.0857	21.0857	21.0857	5.1845e+07	3.05557e+07	2.36499e+07	6.00307e+07
216	(16:0/16:0/20:1)	M+NH4	878.817	C55H108O6N	20.419	20.381	20.392	20.423	20.4035	20.4035	20.4035	20.4035	1.43528e+06	962218	649464	9.62158e+06
217	(18:0e/16:0/18:1)	M+H	847.811	C55H107O5	20.66	20.688	20.677	20.699	20.68	20.68	20.68	20.68	6.48732e+06	882785	206107	1.57467e+06
218	(16:0/18:1/18:1)	M+Na	881.757	C55H102O6Na	20.413	20.424	20.425	20.425	20.4266	20.4266	20.4266	20.4266	9.3911e+07	2.9893e+07	3.07248e+07	9.41186e+07
219	(18:0/16:0/18:2)	M+NH4	876.801	C55H106O6N	22.317	22.377	22.294	22.058	22.295	22.295	22.295	22.295	9.20281e+06	1.648e+06	2.97928e+06	3.84457e+07
220	(16:0/16:0/20:2)	M+NH4	876.801	C55H106O6N	23.011	22.866	22.622	22.861	22.853	22.853	22.853	22.853	2.04375e+07	1.68857e+06	1.3297e+06	1.381e+07
221	(18:1e/16:0/18:1)	M+NH4	862.822	C55H108O5N	20.94	20.89	20.889	20.982	20.9157	20.9157	20.9157	20.9157	3.43105e+08	2.94857e+07	4.08234e+06	6.22713e+07
222	(16:0/18:1/18:2)	M+Na	879.741	C55H100O6Na	20.738	20.761	20.753	20.792	20.7653	20.7653	20.7653	20.7653	1.19982e+08	4.14389e+07	3.28392e+07	1.15541e+08
223	(16:0/16:0/20:3)	M+H	857.759	C55H101O6	20.987	20.971	21	21.04	21.0265	21.0265	21.0265	21.0265	452692	260125	248551	1.30331e+06
224	(16:1/18:1/18:1)	M+NH4	874.786	C55H104O6N	24.336	24.257	24.38	24.394	24.2773	24.2773	24.2773	24.2773	1.47913e+06	0	37119.7	1.37931e+06
225	(18:1e/16:0/18:2)	M+NH4	860.807	C55H106O5N	21.309	21.276	21.253	21.29	21.2894	21.2894	21.2894	21.2894	2.74616e+08	3.08658e+07	2.39637e+06	2.55005e+07
226	(18:2e/16:0/18:1)	M+NH4	860.807	C55H106O5N	21.1	21.107	21.097	21.106	21.0966	21.0966	21.0966	21.0966	5.64455e+07	4.61284e+06	1.24126e+06	1.66673e+07
227	(16:1/18:1/18:2)	M+Na	877.726	C55H98O6Na	21.384	21.373	21.361	21.38	21.3747	21.3747	21.3747	21.3747	1.1523e+08	3.46739e+07	2.2914e+07	9.79542e+07
228	(16:0/18:2/18:2)	M+NH4	872.77	C55H102O6N	21.1	21.297	21.267	21.275	21.346	21.346	21.346	21.346	2.28634e+08	1.16279e+07	1.10705e+07	1.7325e+08
229	(16:0/16:0/20:4)	M+H	855.744	C55H99O6	21.4	21.297	21.265	21.274	21.4496	21.4496	21.4496	21.4496	4.62225e+07	4.273e+07	3.4629e+07	5.37848e+07
230	(24:1/10:1/18:2)	M+NH4	872.77	C55H102O6N	21.753	21.769	21.762	21.762	21.7663	21.7663	21.7663	21.7663	4.08695e+06	213898	22226.1	1.60341e+06
231	(19:1/14:2/19:1)	M+NH4	872.77	C55H102O6N	21.452	21.468	21.435	21.473	21.457	21.457	21.457	21.457	9.90514e+06	73082.5	24932.6	1.05321e+06
232	(16:1e/18:1/18:2)	M+NH4	858.791	C55H104O5N	20.923	20.915	20.93	20.942	20.9298	20.9298	20.9298	20.9298	1.69631e+08	2.15578e+07	1.26756e+06	9.05244e+06
233	(18:3e/16:0/18:1)	M+NH4	858.791	C55H104O5N	21.575	21.594	21.58	21.599	21.6531	21.6531	21.6531	21.6531	2.80668e+07	845235	469073	4.16532e+06
234	(16:0e/16:0/20:4)	M+H	841.764	C55H101O5	21.308	21.313	21.272	21.296	21.27	21.27	21.27	21.27	8.43954e+06	2.48599e+06	450436	2.50549e+06
235	(16:0/16:0/20:5)	M+Na	875.71	C55H96O6Na	22.079	22.089	22.068	22.089	22.0799	22.0799	22.0799	22.0799	4.2293e+06	2.4296e+06	3.56265e+06	4.83466e+06
236	(16:1/18:2/18:2)	M+H	853.728	C55H97O6	18.285	18.267	18.278	18.298	18.2983	18.2983	18.2983	18.2983	5.61283e+07	4.2937e+07	3.34546e+07	5.76248e+07
237	(16:0e/18:2/18:3)	M+NH4	856.775	C55H102O5N	19.196	19.36	19.224	19.22	19.2171	19.2171	19.2171	19.2171	6.80265e+07	6.94222e+06	284232	3.06564e+06
238	(16:0e/16:0/20:5)	M+NH4	856.775	C55H102O5N	19.572	19.571	19.578	19.556	19.5617	19.5617	19.5617	19.5617	3.86865e+07	4.69701e+06	1.12839e+06	5.68796e+06
239	(16:1/18:2/18:3)	M+Na	873.694	C55H94O6Na	18.005	17.947	17.901	17.942	17.9482	17.9482	17.9482	17.9482	2.96244e+07	1.79477e+06	2.51915e+06	1.44465e+07
240	(16:0/16:1/20:5)	M+H	851.712	C55H95O6	18.806	19.028	18.796	18.79	18.812	18.812	18.812	18.812	3.07865e+07	8.33014e+06	1.18864e+07	3.28659e+07
241	(16:0e/18:3/18:3)	M+NH4	854.76	C55H100O5N	19.052	19.06	19.069	19.067	19.0666	19.0666	19.0666	19.0666	2.63674e+07	2.60969e+06	2.42556e+06	1.45004e+07
242	(16:2e/18:2/18:2)	M+Na	859.715	C55H96O5Na	19.661	19.675	19.651	19.621	19.672	19.672	19.672	19.672	412467	4.0865e+06	1.07549e+06	1.36045e+06
243	(16:1/18:3/18:3)	M+Na	871.679	C55H92O6Na	20.725	20.745	20.732	20.693	20.7347	20.7347	20.7347	20.7347	2.02184e+07	383367	743380	3.40736e+06
244	(14:0/18:2/20:5)	M+Na	871.679	C55H92O6Na	19.556	19.565	19.578	19.455	19.5488	19.5488	19.5488	19.5488	2.03221e+07	646549	1.03926e+06	7.76975e+06
245	(16:1/16:1/20:5)	M+H	849.697	C55H93O6	20.091	20.11	20.111	20.114	20.104	20.104	20.104	20.104	2.92123e+07	3.90037e+06	3.63344e+06	2.19727e+07
246	(18:3e/16:1/18:3)	M+NH4	852.744	C55H98O5N	21.084	21.141	21.112	21.108	21.1071	21.1071	21.1071	21.1071	7.5856e+06	640237	254414	1.9195e+06
247	(52:7e)	M+Na	857.699	C55H94O5Na	20.057	20.075	20.065	20.059	20.0675	20.0675	20.0675	20.0675	1.71249e+06	2.22945e+06	1.90368e+06	3.65947e+06
248	(14:0/18:3/20:5)	M+Na	869.663	C55H90O6Na	20.58	20.57	20.581	20.614	20.5836	20.5836	20.5836	20.5836	6.64338e+06	1.63169e+06	651138	1.46402e+06
249	(18:4/16:0/18:4)	M+H	847.681	C55H91O6	19.862	19.86	19.767	19.863	19.861	19.861	19.861	19.861	1.46853e+07	817546	666621	6.87306e+06
250	(52:8)	M+H	847.681	C55H91O6	20.173	20.179	20.179	20.177	20.1687	20.1687	20.1687	20.1687	4.43238e+06	673093	1.05324e+06	3.02987e+06
251	(18:3/14:1/20:5)	M+NH4	862.692	C55H92O6N	20.911	20.938	20.906	20.944	20.8923	20.8923	20.8923	20.8923	8.21766e+06	1.05724e+06	1.02233e+06	1.00239e+06
252	(16:0/16:0/21:0)	M+NH4	894.848	C56H112O6N	20.012	20.067	20.016	19.997	20.0244	20.0244	20.0244	20.0244	3.90012e+08	4.47329e+07	9.70311e+06	1.2137e+08
253	(18:0/17:0/18:0)	M+NH4	894.848	C56H112O6N	19.621	19.341	19.341	19.532	19.5137	19.5137	19.5137	19.5137	2.2935e+08	1.07103e+08	1.7028e+07	1.88207e+08
254	(53:0e)	M+NH4	880.869	C56H114O5N	20.344	20.364	20.34	20.346	20.3459	20.3459	20.3459	20.3459	1.39291e+07	4.54085e+06	268878	2.19133e+06
255	(18:0/17:0/18:1)	M+NH4	892.833	C56H110O6N	20.477	20.692	20.478	20.461	20.4509	20.4509	20.4509	20.4509	5.01263e+08	5.14142e+07	2.00611e+07	2.16736e+08
256	(16:0/18:1/19:0)	M+Na	897.788	C56H106O6Na	19.573	19.714	19.605	19.531	19.523	19.523	19.523	19.523	2.24802e+07	7.05351e+06	4.12118e+06	2.72122e+07
257	(53:1e)	M+NH4	878.854	C56H112O5N	20.228	20.217	20.306	20.235	20.2601	20.2601	20.2601	20.2601	5.33107e+07	3.40818e+06	873112	5.7032e+06
258	(17:0/18:1/18:1)	M+Na	895.773	C56H104O6Na	18.815	18.936	18.81	18.829	18.803	18.803	18.803	18.803	2.93842e+07	5.98632e+06	5.09164e+06	3.2727e+07
259	(53:2e)	M+NH4	876.838	C56H110O5N	20.731	20.759	20.748	20.789	20.7358	20.7358	20.7358	20.7358	7.6131e+07	6.31506e+06	334396	6.07207e+06
260	(29:0/6:0/18:3)	M+Na	893.757	C56H102O6Na	21.474	21.467	21.473	21.462	21.4785	21.4785	21.4785	21.4785	1.33878e+08	1.34463e+06	384824	1.1682e+07
261	(29:1/6:0/18:2)	M+NH4	888.801	C56H106O6N	20.819	21.029	20.791	20.794	20.8034	20.8034	20.8034	20.8034	2.06842e+07	5.56506e+06	2.76949e+06	2.88419e+07
262	(19:1/16:0/18:2)	M+NH4	888.801	C56H106O6N	20.003	20.042	20.088	20.005	20.029	20.029	20.029	20.029	2.72792e+08	1.09793e+07	4.82681e+06	1.34262e+08
263	(17:0/18:1/18:2)	M+Na	893.757	C56H102O6Na	21.098	21.108	21.113	21.108	21.0971	21.0971	21.0971	21.0971	3.43341e+07	5.21261e+06	4.10774e+06	2.67134e+07
264	(16:0/18:3/19:0)	M+NH4	888.801	C56H106O6N	20.706	21.125	20.928	21.04	20.946	20.946	20.946	20.946	791484	146632	132963	898816
265	(16:0/17:0/20:3)	M+H	871.775	C56H103O6	20.091	20.312	20.089	20.069	20.058	20.058	20.058	20.058	4.49903e+06	1.24346e+07	2.33429e+06	9.55588e+06
266	(53:3e)	M+NH4	874.822	C56H108O5N	20.35	20.365	20.338	20.346	20.355	20.355	20.355	20.355	5.11061e+07	6.26436e+06	89198.4	2.85174e+06
267	(16:0/17:0/20:4)	M+NH4	886.786	C56H104O6N	21.004	20.987	20.976	21.024	20.988	20.988	20.988	20.988	2.72816e+07	389340	131916	1.56988e+07
268	(17:0/18:2/18:2)	M+Na	891.741	C56H100O6Na	21.451	21.468	21.441	21.457	21.4466	21.4466	21.4466	21.4466	2.82161e+07	3.82122e+06	2.38773e+06	1.61407e+07
269	(53:4e)	M+NH4	872.807	C56H106O5N	21.291	21.372	21.273	21.29	21.2577	21.2577	21.2577	21.2577	1.97396e+07	4.07818e+06	86085.6	1.70269e+06
270	(53:5)	M+NH4	884.77	C56H102O6N	21.575	21.572	21.582	21.611	21.5927	21.5927	21.5927	21.5927	5.17391e+07	1.16313e+06	865613	1.66382e+07
271	(18:2/17:1/18:2)	M+Na	889.726	C56H98O6Na	21.084	21.101	21	21.023	21.0461	21.0461	21.0461	21.0461	1.29512e+07	1.72138e+06	1.12949e+06	8.54411e+06
272	(17:0/18:2/18:3)	M+NH4	884.77	C56H102O6N	21.907	21.887	21.898	21.916	21.8969	21.8969	21.8969	21.8969	1.07273e+08	4.35191e+06	7.77137e+06	7.19816e+07
273	(16:0/17:0/20:5)	M+H	867.744	C56H99O6	21.45	21.447	21.322	21.298	21.3333	21.3333	21.3333	21.3333	3.91079e+07	1.12533e+07	8.31732e+06	3.75453e+07
274	(53:5e)	M+NH4	870.791	C56H104O5N	21.794	21.798	21.78	21.779	21.7846	21.7846	21.7846	21.7846	2.25125e+07	1.87465e+06	406727	2.5188e+06
275	(18:3/17:1/18:2)	M+NH4	882.755	C56H100O6N	22.199	22.218	22.209	22.211	22.2093	22.2093	22.2093	22.2093	2.71019e+08	1.3348e+07	8.84836e+06	8.54533e+07
276	(17:0/18:3/18:3)	M+H	865.728	C56H97O6	19.14	19.14	19.151	19.138	19.143	19.143	19.143	19.143	3.75699e+07	6.06463e+06	4.41766e+06	2.90469e+07
277	(53:6e)	M+NH4	868.775	C56H102O5N	18.944	18.957	18.924	18.937	18.9498	18.9498	18.9498	18.9498	2.37494e+07	2.30732e+06	887218	2.80963e+06
278	(18:3/17:1/18:3)	M+NH4	880.739	C56H98O6N	20.346	20.365	20.34	20.345	20.3347	20.3347	20.3347	20.3347	1.45753e+08	1.14138e+08	8.55994e+07	1.31524e+08
279	(15:0/18:2/20:5)	M+NH4	880.739	C56H98O6N	19.355	19.341	19.328	19.367	19.3542	19.3542	19.3542	19.3542	1.38217e+07	645576	1.0212e+06	1.75457e+07
280	(53:7e)	M+NH4	866.76	C56H100O5N	19.66	19.69	19.662	19.724	19.6661	19.6661	19.6661	19.6661	9.48456e+06	889811	266254	1.09136e+06
281	(15:0/18:3/20:5)	M+NH4	878.723	C56H96O6N	19.927	20.002	19.92	19.926	19.9376	19.9376	19.9376	19.9376	3.4445e+07	620222	714658	1.21198e+07
282	(53:9)	M+H	859.681	C56H91O6	20.731	20.739	20.743	20.697	20.7124	20.7124	20.7124	20.7124	6.04764e+06	3.00639e+06	933972	3.74399e+06
283	(16:0/19:0/19:0)	M+H	891.838	C57H111O6	19.916	19.947	19.926	19.927	19.9224	19.9224	19.9224	19.9224	6.27021e+08	2.95281e+07	2.36943e+07	4.76748e+08
284	(16:0/16:0/22:0)	M+Na	913.819	C57H110O6Na	21.488	21.469	21.476	21.706	21.463	21.463	21.463	21.463	1.41443e+07	1.2235e+07	1.98606e+06	1.32957e+07
285	(54:0e)	M+NH4	894.885	C57H116O5N	20.15	20.139	20.152	20.112	20.1398	20.1398	20.1398	20.1398	1.63464e+07	5.33366e+06	305581	3.39552e+06
286	(18:0/18:0/18:1)	M+Na	911.804	C57H108O6Na	20.94	20.89	20.889	20.982	20.9393	20.9393	20.9393	20.9393	3.01995e+07	1.35516e+07	1.21516e+07	3.33232e+07
287	(18:4/18:3/18:3)	M+NH4	888.708	C57H94O6N	20.35	20.363	20.283	20.344	20.3389	20.3389	20.3389	20.3389	9.40311e+06	26995.5	1.66635e+06	988577
288	(14:0/20:5/20:5)	M+H	871.681	C57H91O6	19.292	19.3	19.293	19.287	19.292	19.292	19.292	19.292	1.61048e+07	445217	681602	3.82532e+06
289	(12:0e/20:4/22:6)	M+Na	879.684	C57H92O5Na	21.087	21.109	21.115	21.106	21.0986	21.0986	21.0986	21.0986	4.7515e+06	550858	364208	3.59639e+06
290	(20:5/14:1/20:5)	M+H	869.665	C57H89O6	21.527	21.372	21.539	21.513	21.513	21.513	21.513	21.513	7.40743e+06	67201.2	273844	1.03871e+06
291	(20:0e/16:0/18:1)	M+NH4	892.869	C57H114O5N	22.401	22.377	22.405	22.411	22.405	22.405	22.405	22.405	6.83244e+07	5.29821e+06	4.19438e+06	1.03982e+07
292	(16:0/18:1/20:1)	M+Na	909.788	C57H106O6Na	20.478	20.534	20.521	20.536	20.5284	20.5284	20.5284	20.5284	4.5658e+07	8.49599e+06	1.25543e+07	4.3349e+07
293	(20:0/17:1/17:1)	M+NH4	904.833	C57H110O6N	21.309	21.276	21.253	21.29	21.2792	21.2792	21.2792	21.2792	1.99381e+06	133776	121038	1.82485e+06
294	(18:1e/16:0/20:1)	M+NH4	890.854	C57H112O5N	20.789	20.799	20.804	20.794	20.7699	20.7699	20.7699	20.7699	2.0338e+08	1.64827e+07	2.12936e+06	2.27576e+07
295	(18:1/18:1/18:1)	M+Na	907.773	C57H104O6Na	20.943	20.886	20.872	20.982	20.9209	20.9209	20.9209	20.9209	5.18767e+07	1.02529e+07	1.22928e+07	4.41365e+07
296	(16:0/16:0/22:3)	M+H	885.791	C57H105O6	21.752	21.783	21.782	21.76	21.7845	21.7845	21.7845	21.7845	1.11556e+07	1.97846e+07	3.58894e+06	1.36098e+07
297	(54:3)	M+NH4	902.817	C57H108O6N	21.67	21.625	21.63	21.655	21.6406	21.6406	21.6406	21.6406	3.55345e+06	189965	54229.1	2.0701e+06
298	(18:0e/18:1/18:2)	M+NH4	888.838	C57H110O5N	21.083	21.101	21.085	21.071	21.0793	21.0793	21.0793	21.0793	3.02469e+08	3.24253e+07	2.39721e+06	2.72261e+07
299	(18:1/18:1/18:2)	M+Na	905.757	C57H102O6Na	21.772	21.782	21.777	21.803	21.79	21.79	21.79	21.79	6.24726e+07	1.9864e+07	1.29795e+07	4.94049e+07
300	(16:0/16:0/22:4)	M+H	883.775	C57H103O6	22.317	22.412	22.294	22.494	22.4111	22.4111	22.4111	22.4111	5.1845e+07	3.05557e+07	2.36499e+07	6.00307e+07
301	(54:4)	M+NH4	900.801	C57H106O6N	24.502	24.456	24.516	24.521	24.5038	24.5038	24.5038	24.5038	6.83313e+06	5.18828e+06	898156	7.14474e+06
302	(26:1/10:1/18:2)	M+NH4	900.801	C57H106O6N	21.227	21.248	21.253	21.291	21.2607	21.2607	21.2607	21.2607	1.78078e+06	42048.7	0	668998
303	(18:0/18:2/18:2)	M+NH4	900.801	C57H106O6N	21.1	21.109	21.126	21.147	21.1385	21.1385	21.1385	21.1385	247584	0	0	178097
304	(18:1e/18:1/18:2)	M+NH4	886.822	C57H108O5N	22.133	22.377	21.895	21.956	22.13	22.13	22.13	22.13	2.30693e+08	2.89304e+07	1.81295e+06	1.63483e+07
[truncated: 320 more rows]

## Sheet: Table S2
Table S2. VIP score of significantly different lipid molecular species of L. vannamei under low-temperatures storage.
No.	Molecular species	Ion (m/z)	VIP score
PC
1	(11:0/16:1)	662.476	2.4744
2	(12:1e/18:1)	688.528	1.0124
3	(12:1e/20:4)	710.512	1.0029
4	(12:1e/22:5)	736.528	1.1225
5	(14:1e)	466.293	1.0102
6	(14:1e/17:0)	704.559	1.417
7	(14:1e/18:3)	712.528	1.1558
8	(14:1e/20:1)	744.59	1.8454
9	(16:1/22:5)	850.56	1.224
10	(17:0/19:0)	848.639	1.1867
11	(17:1/18:3)	812.545	1.1192
12	(17:3)	518.288	1.0776
13	(18:0/14:2)	788.545	1.0981
14	(18:0/16:1)	804.576	1.0129
15	(18:0e/18:3)	814.597	1.0351
16	(18:1/14:0)	732.554	1.0922
17	(18:2e/22:6)	860.581	2.1191
18	(18:3/18:3)	800.52	1.4828
19	(18:3/20:4)	848.545	1.2696
20	(18:3/24:2)	908.639	1.1744
21	(18:3e/18:1)	768.59	2.6814
22	(18:3e/20:5)	832.55	4.73
23	(18:3e/22:6)	858.565	4.3171
24	(18:4/18:3)	820.513	1.9678
25	(18:4/20:5)	844.513	1.0119
26	(18:5e)	514.293	1.1929
27	(19:3)	546.319	2.3107
28	(19:4)	544.303	1.1517
29	(20:3/20:5)	874.56	1.1123
30	(21:2e)	562.387	2.7589
31	(22:1/14:2)	784.585	1.894
32	(22:1/22:5)	934.654	1.3465
33	(22:2)	590.382	1.4395
34	(23:2e)	590.418	1.2211
35	(23:4e)	586.387	1.3958
36	(23:5e)	584.371	1.2349
37	(25:0/16:0)	904.701	1.1585
38	(26:0/18:3)	940.701	1.1081
39	(26:3e)	630.449	1.1075
40	(26:5e)	626.418	1.6206
41	(28:2)	674.476	1.0312
42	(29:2)	688.491	2.11
43	(30:5e)	682.481	2.0038
44	(31:4e)	698.512	1.03
45	(35:3e)	756.59	1.3998
46	(35:4e)	754.575	2.4195
47	(36:1e)	832.644	1.8105
48	(37:0e)	790.668	1.4818
49	(37:3e)	784.621	2.0827
50	(38:8)	802.538	1.1298
51	(38:9)	800.522	1.1386
52	(39:3e)	812.653	1.775
53	(39:4e)	810.637	1.1102
54	(40:1)	844.679	1.6962
55	(42:0)	932.733	1.338
56	(43:0)	888.742	2.3714
57	(44:0e)	888.778	1.1476
58	(44:4)	894.695	1.0503
59	(46:0)	930.789	1.0073
60	(47:1)	942.789	1.4565
61	(47:5)	934.726	4.1828
62	(48:6)	946.726	1.0884
PE
1	(14:0p/20:4)	696.496	1.3916
2	(14:1e/20:4)	694.482	1.0641
3	(15:0/16:1)	674.477	3.07
4	(15:0/18:2)	700.492	1.7918
5	(16:0e/16:1)	674.513	1.2014
6	(16:0e/18:3)	698.513	1.2148
7	(16:1/14:0)	662.476	2.0361
8	(16:1/14:1)	658.445	1.7024
9	(16:1/18:3)	710.477	1.4161
10	(16:1e)	474.259	1.3535
11	(16:1e/15:0)	660.497	1.0095
12	(16:1e/17:0)	688.529	1.8896
13	(17:0e)	468.308	1.2914
14	(17:1e)	466.293	1.0694
15	(18:0e/15:0)	690.544	1.0116
16	(18:0e/20:3)	754.576	1.1175
17	(18:0e/22:4)	780.591	1.566
18	(18:0p/15:0)	690.543	1.917
19	(18:0p/17:0)	718.575	1.2884
20	(18:1e/17:0)	716.56	1.5867
21	(18:1e/19:0)	744.591	1.2889
22	(18:1e/20:3)	752.56	1.4456
23	(18:1e/22:0)	786.638	1.1377
24	(18:1e/24:0)	814.67	1.2596
25	(18:1e/24:2)	810.638	1.0089
26	(18:2/20:4)	762.508	1.8541
27	(18:2e/22:6)	772.529	1.3169
28	(18:2p/20:5)	746.512	1.471
29	(18:3e)	476.277	1.1316
30	(18:4/20:5)	756.461	1.1463
31	(19:0e)	496.34	1.6726
32	(19:1e)	494.324	1.1265
33	(19:4e)	488.277	1.7903
34	(19:5e)	486.262	2.3019
35	(20:0e)	510.355	1.9556
36	(20:2e)	528.306	1.3117
37	(21:5e)	514.293	1.1823
38	(22:1e)	536.371	2.5143
39	(22:2)	548.335	1.1366
40	(22:5e)	550.29	1.0643
41	(24:2)	576.366	3.1235
42	(30:6)	650.383	2.9015
43	(31:1e)	662.512	2.3014
44	(31:6)	664.398	2.5076
45	(32:1)	712.489	1.4676
46	(32:1e)	674.513	1.2022
47	(33:1e)	690.543	1.8194
48	(33:8)	688.398	2.4942
49	(34:4e)	698.512	1.0781
50	(35:1)	730.539	1.7309
51	(36:0/18:2)	994.821	1.7407
52	(36:3e)	750.541	1.3418
53	(38:1e)	782.603	1.994
54	(40:3e)	782.607	1.2199
55	(8:0e/8:0)	454.293	1.5096
56	(8:1e/10:0)	502.29	1.0268
PI
1	(16:0/20:3)	859.534	1.5682
2	(17:0/18:2)	871.531	1.3754
3	(18:0/18:1)	887.562	1.6802
4	(18:0/20:5)	907.531	1.3169
5	(18:0/22:5)	911.566	1.8952
6	(18:0/22:6)	909.55	2.176
7	(18:1/18:2)	859.534	1.0453
8	(18:1/20:3)	885.55	1.6684
9	(18:1/20:5)	900.56	1.0448
10	(18:1/22:6)	907.534	1.3223
11	(18:3/20:5)	896.528	1.1809
12	(20:2/20:4)	909.55	1.0113
13	(20:4/22:6)	929.519	1.128
14	(32:1)	807.503	1.1314
15	(33:1)	821.519	1.7116
16	(34:1)	835.534	1.0545
17	(40:7)	926.575	2.6729
PG
1	PG(16:0/16:1)	719.487	1.1258
2	PG(16:1/14:0)	691.456	2.0508
3	PG(16:1/16:1)	717.471	2.236
4	PG(16:1/18:1)	745.503	1.1785
5	PG(17:1/16:1)	731.487	3.5913
6	PG(18:0/17:0)	763.549	1.2177
7	PG(18:1/20:5)	793.503	1.2245
8	PG(37:0)	791.581	1.8378
9	PG(44:1)	889.689	1.7309
PS
1	(16:0/18:2)	758.498	1.3175
2	(16:0/22:6)	806.498	1.0621
3	(18:0/20:1)	816.576	1.8881
4	(18:0/20:2)	838.557	1.6454
5	(18:0/22:5)	838.559	1.6024
6	(18:0/22:6)	834.529	1.0085
7	(18:1/18:1)	786.529	2.4624
8	(20:2/20:5)	832.513	1.1346
9	(22:0/18:2)	842.592	1.1934
10	(24:1/20:4)	892.607	1.3372
11	(34:3e)	742.503	1.2328
12	(36:5e)	766.503	1.0091
13	(37:3e)	784.55	1.2808
14	(38:2e)	800.581	1.3938
15	(42:8)	860.544	2.1231
16	(42:8e)	844.55	1.6843
17	(43:5)	878.592	1.1738
LPC
1	(18:2e)	506.361	1.0952
2	(20:0)	574.384	1.0417
3	(20:2e)	534.392	1.2189
LPE
1	(14:0)	426.262	2.0835
2	(15:0)	440.277	1.1196
3	(16:1)	474.259	1.3501
4	(17:0)	490.29	1.1766
5	(17:1)	488.275	1.233
6	(18:2e)	486.295	1.1992
7	(18:3)	476.277	1.9206
8	(18:4)	472.247	1.9829
9	(19:1)	492.31	1.5024
10	(22:2)	532.341	1.6582
11	(22:3)	530.325	2.5
12	(22:4)	528.31	1.7355
13	(24:2)	560.372	1.7173
LPI
1	(16:0)	571.289	2.6574
2	(18:1)	597.305	1.7496
3	(18:2)	595.289	2.0949
4	(20:4)	619.289	2.2998
5	(20:5)	617.273	2.0059
LPG
1	(16:1)	481.257	6.1442
2	(18:2)	507.273	1.0384
LPS
1	(18:1)	546.28	1.0748
2	(18:2)	544.265	1.7249
3	(20:3)	570.28	1.3436
4	(20:5)	566.249	3.6996
5	(22:6)	570.283	1.5442
Cer
1	(d12:0/20:1)	554.479	3.0951
2	(d12:0/21:1)	568.495	2.8637
3	(d12:0/22:1)	582.51	2.6533
4	(d14:2/19:0)	566.479	1.3522
5	(d14:2/20:0)	580.495	1.6532
6	(d14:2/23:0)	622.542	1.1027
7	(d15:1/18:0)	524.504	1.9468
8	(d15:1/20:1)	594.51	1.3822
9	(d16:1/18:3)	532.472	1.1193
10	(d18:1/23:2)	632.598	2.7432
11	(d30:0)	528.463	1.4574
12	(d34:3)	578.479	2.9954
13	(m31:0+O)	542.479	1.0309
14	(t39:6)	612.5	3.7114
HexCer
1	(d16:2/20:4)	762.516	1.2759
2	(d34:3)	740.532	1.162
3	(t17:1/20:5)	746.521	1.593
4	(t20:1/22:6)	860.589	2.6028
5	(t34:2)	758.542	1.3995
6	(t36:2)	800.589	1.2115
7	(d30:1)	804.548	1.8014
SM
1	(d16:1/22:3)	753.591	1.6098
2	(d32:1)	675.544	1.7899
3	(t39:4)	783.601	3.3995
4	(t39:6)	779.57	1.0043
5	(t41:7)	805.585	1.5332
DG
1	(16:0/23:0)	684.65	2.0673
2	(16:0/24:0)	698.666	1.5826
3	(16:1/18:3)	606.509	2.0856
4	(17:0/17:0)	614.572	2.3976
5	(18:0/17:0)	628.587	2.1094
6	(18:2)	386.29	1.0056
7	(18:2e)	355.284	1.56
8	(18:3/18:3)	630.509	1.4171
9	(19:0/20:5)	674.572	1.1374
10	(20:0/18:2)	671.558	1.2917
11	(20:1/22:5)	714.603	1.0615
12	(26:5e)	478.389	1.5859
13	(30:1e)	547.47	1.0718
14	(31:0e)	563.501	1.2379
15	(31:1e)	561.485	1.4325
16	(33:0)	600.556	2.1839
17	(34:2)	593.514	1.8394
18	(34:5e)	573.488	1.304
19	(36:0)	625.577	1.0494
20	(36:0e)	633.579	1.0315
21	(36:2)	621.545	3.0176
22	(37:1)	654.603	3.7601
23	(38:3e)	633.582	1.0315
24	(39:0)	684.65	3.5374
25	(41:0)	712.681	1.5168
26	(43:0)	740.713	1.3122
27	(44:7)	740.619	1.4368
28	(49:1)	822.791	1.2051
29	(50:3)	832.775	1.4831
30	(51:1)	850.822	1.1318
31	(51:2)	848.807	1.9836
32	(52:0)	866.854	1.1201
33	(52:3)	860.807	1.3456
34	(53:2)	876.838	1.3767
35	(53:3)	874.822	2.2482
36	(55:2)	904.869	1.5016
TG
1	(10:0/10:1/18:1)	680.582	1.2705
2	(10:0/18:2/18:2)	788.676	1.7744
3	(11:0/14:0/18:1)	752.676	1.5918
4	(11:0/16:1/18:2)	776.676	1.0186
5	(11:0/18:1/18:2)	804.708	1.2211
6	(11:0/18:2/18:2)	802.692	1.762
7	(11:0/18:2/18:3)	800.676	2.2875
8	(12:0/18:2/18:2)	821.663	1.4768
9	(12:0e/11:4/18:1)	702.603	2.5829
10	(12:0e/6:0/20:3)	647.561	1.2736
11	(12:1e/6:0/18:4)	632.525	1.0308
12	(14:0/14:0/18:3)	790.692	1.9556
13	(14:0/14:0/20:3)	801.697	2.5464
14	(14:0/18:2/20:5)	871.679	1.3423
15	(14:0/20:5/20:5)	871.681	1.1274
16	(14:0e/10:4/11:4)	617.418	3.5156
17	(14:0e/18:2/18:2)	830.76	1.9855
18	(15:0/14:0/18:2)	806.723	1.0537
19	(15:0/18:2/20:5)	880.739	1.7037
20	(15:0/18:2/22:6)	911.71	1.4223
21	(15:0/18:3/20:5)	878.723	1.2236
22	(15:0/18:3/22:6)	904.739	1.9764
23	(16:0/10:0/16:1)	738.661	2.733
24	(16:0/10:0/22:6)	812.676	1.1765
25	(16:0/12:3/16:0)	762.661	1.4047
26	(16:0/16:0/20:1)	878.817	1.6973
27	(16:0/16:0/20:3)	857.759	1.1169
28	(16:0/16:0/22:6)	896.77	1.0565
29	(16:0/16:1/18:1)	848.77	1.1681
30	(16:0/17:0/20:4)	886.786	1.3616
31	(16:0/17:0/22:6)	910.786	1.4953
32	(16:0/18:1/22:1)	937.819	1.197
33	(16:0/18:1/22:6)	927.741	1.1784
34	(16:0/18:1/24:1)	965.851	1.4258
35	(16:0/18:2/18:2)	872.77	1.2278
36	(16:0/18:2/21:0)	923.804	1.1656
37	(16:0/18:2/22:4)	924.801	1.2272
38	(16:0/18:2/22:6)	925.726	1.2422
39	(16:0/18:2/23:0)	946.88	1.4249
40	(16:0/18:3/22:6)	918.755	1.4448
41	(16:0/19:0/19:0)	891.838	1.2261
42	(16:0/19:0/22:6)	938.817	1.55
43	(16:0/20:5/23:0)	968.864	1.636
44	(16:0/22:4/23:0)	981.884	1.015
45	(16:0/22:6/22:6)	973.726	1.1777
46	(16:0/22:6/23:0)	994.88	2.9285
47	(16:0/8:0/16:0)	695.618	1.7575
48	(16:0e/10:1/10:1)	621.545	3.3514
49	(16:0e/12:2/12:2)	673.577	1.1363
50	(16:0e/16:0/16:0)	815.746	1.5707
51	(16:0e/18:2/18:3)	856.775	1.9462
52	(16:0e/22:6/22:6)	954.791	1.1215
53	(16:1/12:0/16:1)	764.676	1.7984
54	(16:1/13:0/16:1)	778.692	1.1371
55	(16:1/14:0/16:1)	792.708	1.2347
56	(16:1/18:1/18:1)	874.786	1.5062
57	(16:1/18:2/18:3)	873.694	1.151
58	(16:1/18:3/18:3)	871.679	1.6585
59	(16:1/20:4/24:1)	980.864	1.8781
60	(16:1e/16:0/18:2)	832.775	1.1169
61	(16:1e/16:0/24:1)	918.885	1.0273
62	(16:1e/18:1/18:2)	858.791	1.8234
63	(17:0/18:2/18:3)	884.77	2.1031
64	(17:0/18:2/20:4)	910.786	1.5116
65	(17:0/18:2/22:5)	936.801	1.3579
66	(17:0/22:6/22:6)	982.786	1.6589
67	(18:0/16:0/18:2)	876.801	1.7822
68	(18:0/16:0/22:6)	924.801	1.7531
69	(18:0/18:1/22:6)	950.817	1.209
70	(18:0/18:2/18:2)	900.801	1.6136
71	(18:0/20:1/20:5)	952.833	1.414
72	(18:0/22:6/22:6)	996.801	1.5248
73	(18:0/22:6/24:0)	1036.93	2.6227
74	(18:0e/16:0/16:0)	843.778	1.2434
75	(18:0e/18:1/18:2)	888.838	1.357
76	(18:0e/18:1/22:6)	936.838	1.2725
77	(18:0e/20:1/22:6)	964.869	1.4869
78	(18:0e/22:1/22:6)	992.9	1.5997
79	(18:0e/22:6/22:6)	982.822	1.9935
80	(18:0e/6:0/11:1)	626.572	1.6743
81	(18:0e/9:0/9:0)	642.603	1.935
82	(18:1/10:1/10:1)	678.567	1.631
83	(18:1/12:0/14:0)	766.692	1.3863
84	(18:1/12:3/18:1)	814.692	1.6012
85	(18:1/18:1/21:1)	949.819	1.5838
86	(18:1/18:1/22:4)	935.806	1.1894
87	(18:1/18:1/22:5)	955.773	1.0207
88	(18:1/18:1/22:6)	953.757	1.2294
89	(18:1/18:1/23:0)	979.866	1.7463
90	(18:1/18:1/23:1)	977.851	1.8683
91	(18:1/18:1/24:0)	993.882	1.8513
92	(18:1/18:2/18:3)	896.77	1.5697
93	(18:1/18:2/21:1)	942.848	1.1662
94	(18:1/18:2/22:0)	963.835	1.5241
95	(18:1/18:2/22:1)	961.819	1.4856
96	(18:1/18:2/22:5)	953.757	1.281
97	(18:1/18:2/22:6)	951.741	1.2209
98	(18:1/18:2/24:0)	991.866	1.7933
99	(18:1/20:2/22:5)	976.833	1.5156
100	(18:1/20:4/22:1)	980.864	1.7647
101	(18:1/20:4/23:0)	996.895	1.8164
102	(18:1/20:4/24:0)	1010.91	1.4974
103	(18:1/20:4/24:1)	1008.9	1.624
104	(18:1/20:5/20:5)	925.728	1.2191
105	(18:1/20:5/22:0)	980.864	2.328
106	(18:1/20:5/22:6)	973.726	1.7343
107	(18:1/20:5/23:0)	994.88	1.8781
108	(18:1/21:1/22:6)	990.848	2.4792
109	(18:1/22:0/22:6)	1006.88	2.3247
110	(18:1/22:1/22:6)	1004.86	2.0968
111	(18:1/22:4/22:6)	998.817	1.383
112	(18:1/22:5/23:0)	1022.91	3.6972
113	(18:1/22:5/24:0)	1036.93	2.0119
114	(18:1/22:6/22:6)	994.786	1.9917
115	(18:1/22:6/23:0)	1020.9	3.2052
116	(18:1/22:6/24:0)	1034.91	2.0609
117	(18:1/22:6/24:1)	1032.9	2.8932
118	(18:1/24:1/24:1)	1071	2.2643
119	(18:1e/11:1/11:1)	675.592	2.0805
120	(18:1e/15:0/16:0)	822.791	1.3248
121	(18:1e/16:0/18:2)	860.807	1.3449
122	(18:1e/16:0/20:1)	890.854	1.0344
123	(18:1e/18:1/18:2)	886.822	1.608
124	(18:1e/18:1/22:6)	934.822	1.0143
125	(18:2/13:0/18:2)	835.679	1.1834
126	(18:2/14:3/18:2)	821.665	1.4733
127	(18:2/17:1/22:6)	932.77	1.5062
128	(18:2/18:2/21:1)	940.833	1.2557
129	(18:2/18:2/23:0)	975.835	2.8303
130	(18:2/18:2/23:1)	968.864	1.5704
131	(18:2/22:6/22:6)	992.77	1.7808
132	(18:2/22:6/23:0)	1018.88	3.5294
133	(18:2e/15:0/18:3)	842.76	2.3208
134	(18:3/13:0/18:2)	828.708	1.191
135	(18:3/13:0/18:3)	826.692	3.8832
136	(18:3/17:1/22:6)	930.755	2.6345
137	(18:3/18:2/22:6)	947.71	1.1092
138	(18:3/18:2/23:1)	966.848	2.3614
139	(18:3/18:3/18:3)	895.679	1.3173
140	(18:3/22:6/22:6)	973.728	1.1777
141	(18:4/18:3/18:3)	888.708	3.2103
142	(19:0/18:1/18:2)	921.788	1.1849
143	(19:0/18:1/20:5)	921.791	1.185
144	(19:0/18:1/22:5)	966.848	1.7187
145	(19:0/18:1/22:6)	964.833	1.8761
146	(19:0/22:1/22:1)	1030.97	1.489
147	(19:1/14:2/19:1)	872.77	1.0821
148	(19:1/16:0/18:2)	888.801	1.0035
149	(19:1/18:1/22:6)	962.817	1.5125
150	(19:1/18:2/18:2)	912.801	1.1927
151	(19:1/18:2/22:6)	960.801	1.4181
152	(20:0/17:1/17:1)	904.833	1.2964
153	(20:0e/16:0/16:0)	866.854	1.1201
154	(20:0e/18:2/18:2)	914.854	1.0538
155	(20:0e/6:0/11:1)	654.603	4.0403
156	(20:0e/6:0/9:0)	628.587	2.1345
157	(20:1/18:1/18:1)	935.804	1.069
158	(20:1/18:1/22:5)	978.848	1.5465
159	(20:1/18:1/22:6)	976.833	1.6673
160	(20:1/18:1/24:0)	1016.96	1.5924
161	(20:1/18:2/22:6)	974.817	1.6342
162	(20:1/20:1/20:5)	978.848	2.0424
163	(20:1/22:5/22:5)	1026.85	1.3937
164	(20:1/22:6/22:6)	1022.82	2.6991
165	(20:1e/18:1/18:2)	919.809	2.1133
166	(20:1e/18:2/18:3)	915.778	1.1705
167	(20:1e/20:5/20:5)	956.807	1.1805
168	(20:1e/6:0/10:1)	621.545	3.5372
169	(20:1e/6:0/12:2)	647.561	2.5645
170	(20:2/18:2/22:6)	972.801	1.6248
171	(20:2/20:5/20:5)	951.744	1.2253
172	(20:2/22:5/22:5)	1024.83	1.8267
173	(20:2/22:6/22:6)	1020.8	2.7202
174	(20:2e/18:2/18:2)	893.796	1.7862
175	(20:3/18:2/22:6)	970.786	1.1648
176	(20:4/22:6/22:6)	1016.77	1.0947
177	(20:4e/20:2/20:2)	962.854	1.1505
178	(20:5/13:0/18:2)	852.708	2.2087
179	(20:5/14:1/20:5)	869.665	1.4196
180	(20:5/18:2/22:5)	951.744	1.2976
181	(20:5/18:2/22:6)	949.728	1.3126
182	(20:5/18:2/23:0)	992.864	2.4336
183	(20:5/20:5/22:6)	971.712	1.377
184	(22:0/18:2/20:5)	961.822	1.6011
185	(22:1/18:2/18:2)	954.848	1.4287
186	(22:1/18:2/22:6)	1002.85	1.7548
187	(22:1/18:2/23:0)	1028.96	2.0541
188	(22:2/18:2/22:6)	1000.83	1.6743
189	(22:5/17:1/17:1)	922.786	1.346
190	(22:5/17:1/18:2)	934.786	1.8798
191	(22:5/18:2/22:5)	996.801	1.9883
192	(22:5/18:2/22:6)	994.786	2.4742
193	(22:6/17:1/22:6)	980.77	1.1291
194	(24:0/18:2/18:2)	984.895	1.7191
195	(24:1/18:2/18:2)	982.88	1.5611
196	(24:1/18:2/22:6)	1030.88	2.608
197	(24:1/18:2/23:0)	1056.99	2.7967
198	(24:1/18:2/24:1)	1068.99	2.7674
199	(25:0/16:0/18:1)	981.882	1.015
200	(25:0/18:1/18:1)	1002.94	1.5534
201	(25:0/18:1/18:2)	1000.93	1.8126
202	(25:0/18:1/20:4)	1007.9	3.1382
203	(25:0/18:1/22:6)	1048.93	4.3506
204	(25:0/18:2/18:2)	998.911	1.7231
205	(25:0/18:2/20:2)	1009.92	1.0964
206	(25:1/16:0/16:0)	948.895	1.0286
207	(26:0/18:1/18:2)	1014.94	1.8868
208	(26:0/18:1/22:6)	1062.94	3.8953
209	(26:0/18:2/18:2)	1012.93	1.7565
210	(26:0/18:2/22:6)	1060.93	3.0937
211	(26:0/18:2/23:0)	1087.04	1.2357
212	(26:1/10:1/18:2)	900.801	1.1158
213	(26:1/18:1/20:5)	1034.91	1.6533
214	(27:0/18:2/18:2)	1031.9	2.9738
215	(28:0/18:1/18:1)	1044.99	1.4447
216	(28:0/18:1/18:2)	1042.97	1.8956
217	(28:0/18:2/18:2)	1040.96	1.8429
218	(28:0/18:2/22:1)	1099.04	2.0893
219	(28:1/11:2/22:6)	988.833	2.0087
220	(29:0/18:1/18:1)	1059	1.572
221	(29:0/6:0/18:3)	893.757	1.0415
222	(29:1/10:3/18:2)	921.791	1.3369
223	(29:1/6:0/18:2)	888.801	1.126
224	(30:0/18:1/18:1)	1073.02	1.5548
225	(37:2e)	652.587	3.8329
226	(46:6e)	770.666	1.0333
227	(49:0e)	824.807	1.6246
228	(49:2e)	820.775	1.4015
229	(50:3)	846.755	2.0776
230	(50:5e)	828.744	1.5658
231	(50:6e)	831.684	1.626
232	(51:0e)	852.838	1.2582
233	(51:1e)	850.822	1.0338
234	(51:2e)	848.807	2.8184
235	(51:3e)	846.791	2.4487
236	(51:4e)	844.775	1.8042
237	(53:0e)	880.869	1.3992
238	(53:2e)	876.838	1.4414
239	(53:3e)	874.822	2.2442
240	(53:4e)	872.807	1.9935
241	(53:5)	884.77	1.2174
242	(54:0e)	894.885	1.2009
243	(54:6e)	887.746	1.0519
244	(55:10)	902.723	1.3408
245	(55:2e)	904.869	1.5551
246	(55:3e)	902.854	2.3999
247	(55:4e)	900.838	1.3698
248	(55:5e)	898.822	1.1632
249	(56:0e)	922.916	1.1906
250	(57:11)	928.739	1.2639
251	(57:1e)	934.916	1.0714
252	(57:2e)	932.9	1.5816
253	(58:2e)	946.916	1.2873
254	(58:3e)	944.9	1.1672
255	(58:4e)	942.885	1.0924
256	(59:2e)	960.932	1.6981
257	(59:3e)	958.916	1.4305
258	(59:5e)	954.885	1.3919
259	(59:6)	966.848	1.4181
260	(59:8)	962.817	3.04
261	(59:8e)	948.838	1.0433
262	(6:0/18:2/18:2)	715.587	1.7759
263	(60:1e)	976.963	1.9039
264	(60:3e)	972.932	1.4375
265	(61:1)	1009.91	1.0964
266	(61:5e)	982.916	1.0883
267	(61:6e)	980.9	1.3895
268	(61:7e)	978.885	1.3317
269	(62:6e)	994.916	1.5277
270	(63:7e)	1006.92	2.1304
271	(63:9)	1016.86	3.3322
272	(64:10)	1028.86	1.4843
273	(64:7e)	1020.93	2.2877
274	(65:6)	1050.94	4.1343
275	(66:6)	1064.96	4.0285
276	(66:7)	1062.94	2.9133
277	(66:8)	1060.93	2.4875
278	(66:9)	1058.91	3.0604
279	(68:4)	1097.02	3.7239
280	(70:3)	1127.07	1.5745

## Sheet: Table S3
Table S3. Pearson’s correlation between all the significantly different lipid molecular species and quality characteristics of L. vanamei under low-temperatures storage.
Molecular spcies	Ion (m/z)	L*	a*	b*	Springiness	Gumminess	Cohesiveness	Chewiness	Hardness
PC
(11:0/16:1)	662.476	-0.676**	0.589**	0.934**	-0.902**	-0.644**	-0.861**	-0.575**	-0.741**
(12:1e/18:1)	688.528	-0.392644	0.376142	0.775**	-0.764**	-0.400112	-0.649**	-0.39373	-0.493*
(12:1e/20:4)	710.512	-0.0264445	0.16137	0.435*	-0.448*	-0.0858669	-0.272384	-0.192289	-0.126792
(12:1e/22:5)	736.528	-0.0577416	-0.139665	0.441*	-0.319042	-0.0153338	-0.293088	0.18506	-0.135876
(14:1e)	466.293	0.378905	-0.546**	-0.531**	0.601**	0.445*	0.506*	0.639**	0.444*
(14:1e/17:0)	704.559	-0.242962	0.135469	0.713**	-0.650**	-0.239745	-0.549**	-0.143137	-0.355076
(14:1e/18:3)	712.528	-0.0794095	0.067951	0.535**	-0.500*	-0.11831	-0.388979	-0.0506608	-0.20084
(14:1e/20:1)	744.59	-0.277936	0.0591949	0.654**	-0.543**	-0.160126	-0.563**	-0.0570471	-0.384082
(16:1/22:5)	850.56	0.0763795	-0.328939	0.171537	-0.0498113	0.100212	-0.084159	0.370216	0.054924
(17:0/19:0)	848.639	0.352379	-0.557**	-0.0446563	0.139531	0.428*	0.10835	0.578**	0.267598
(17:1/18:3)	812.545	0.173505	-0.360078	0.0440441	0.0657928	0.194315	0.0476492	0.424*	0.175373
(17:3)	518.288	0.0653514	-0.200395	-0.459*	0.490*	0.165174	0.353241	0.314859	0.189654
(18:0/14:2)	788.545	0.410*	-0.440*	-0.753**	0.778**	0.450*	0.674**	0.569**	0.541**
(18:0/16:1)	804.576	0.0100264	-0.188125	0.162797	-0.124853	0.104194	-0.202022	0.170005	-0.0130961
(18:0e/18:3)	814.597	0.207805	-0.454*	0.0713395	0.033538	0.233066	0.00587554	0.487*	0.157116
(18:1/14:0)	732.554	0.452*	-0.226494	-0.480*	0.405*	0.361254	0.549**	0.101751	0.501*
(18:2e/22:6)	860.581	-0.244696	0.00843126	0.608**	-0.515**	-0.197219	-0.506*	0.00799873	-0.329239
(18:3/18:3)	800.52	0.169928	-0.40143	0.120112	0.0055219	0.214646	-0.0171666	0.465*	0.109662
(18:3/20:4)	848.545	0.0484793	-0.258356	0.095925	0.00217808	0.0908894	-0.0408087	0.350431	0.0385142
(18:3/24:2)	908.639	0.475*	-0.240116	-0.640**	0.569**	0.465*	0.585**	0.411*	0.492*
(18:3e/18:1)	768.59	0.107741	-0.320787	0.26833	-0.138662	0.13457	-0.133425	0.373381	0.0241381
(18:3e/20:5)	832.55	0.169254	-0.393372	0.199165	-0.0846295	0.191408	-0.10636	0.419*	0.0936433
(18:3e/22:6)	858.565	-0.0415247	-0.176164	0.409*	-0.300887	-0.00421903	-0.319323	0.199037	-0.112139
(18:4/18:3)	820.513	-0.21911	-0.0197289	0.185106	-0.0765008	-0.11321	-0.211993	0.165298	-0.162123
(18:4/20:5)	844.513	-0.571**	0.384358	0.16326	-0.160496	-0.458*	-0.321942	-0.228428	-0.458*
(18:5e)	514.293	0.474*	-0.652**	-0.487*	0.586**	0.543**	0.510*	0.724**	0.506*
(19:3)	546.319	0.405*	-0.570**	-0.503*	0.587**	0.461*	0.506*	0.662**	0.453*
(19:4)	544.303	-0.11856	0.056268	-0.378785	0.352182	-0.0310141	0.244789	0.011599	0.0303428
(20:3/20:5)	874.56	0.0108774	-0.204143	0.357804	-0.247302	0.0403411	-0.226861	0.251352	-0.0818373
(21:2e)	562.387	-0.215374	0.0369724	0.563**	-0.447*	-0.142984	-0.455*	0.0412301	-0.288979
(22:1/14:2)	784.585	0.277282	-0.272587	-0.170345	0.194014	0.316324	0.102966	0.129441	0.241649
(22:1/22:5)	934.654	-0.834**	0.637**	0.629**	-0.629**	-0.722**	-0.710**	-0.594**	-0.778**
(22:2)	590.382	0.0402684	-0.100857	0.436*	-0.326458	0.0465204	-0.222046	0.115885	-0.0467592
(23:2e)	590.418	-0.397453	0.506*	0.688**	-0.729**	-0.420*	-0.598**	-0.546**	-0.487*
(23:4e)	586.387	-0.33661	0.324789	-0.247183	0.186774	-0.244064	0.0676173	-0.241502	-0.177206
(23:5e)	584.371	-0.272114	0.263672	-0.299239	0.239046	-0.183076	0.127497	-0.175684	-0.116654
(25:0/16:0)	904.701	0.2972	-0.144923	-0.324323	0.251326	0.29461	0.262891	0.19354	0.29758
(26:0/18:3)	940.701	-0.338834	0.150302	0.730**	-0.639**	-0.332761	-0.614**	-0.156419	-0.432*
(26:3e)	630.449	-0.372801	0.261691	0.695**	-0.603**	-0.310983	-0.560**	-0.194878	-0.437*
(26:5e)	626.418	-0.677**	0.588**	0.930**	-0.915**	-0.637**	-0.880**	-0.578**	-0.755**
(28:2)	674.476	-0.710**	0.611**	0.205741	-0.247303	-0.564**	-0.368739	-0.612**	-0.570**
(29:2)	688.491	-0.625**	0.558**	0.918**	-0.921**	-0.628**	-0.854**	-0.564**	-0.718**
(30:5e)	682.481	-0.307331	0.258572	-0.284184	0.22969	-0.197941	0.0964452	-0.237733	-0.147919
(31:4e)	698.512	-0.21774	0.164667	0.676**	-0.623**	-0.226069	-0.513*	-0.168358	-0.33605
(35:3e)	756.59	0.0609639	-0.280873	0.29198	-0.172207	0.0820273	-0.157214	0.328854	-0.010242
(35:4e)	754.575	0.314845	-0.503*	-0.0408856	0.113423	0.271591	0.126452	0.546**	0.229576
(36:1e)	832.644	0.403481	-0.616**	-0.133548	0.255541	0.414*	0.23573	0.650**	0.358804
(37:0e)	790.668	-0.0963219	-0.114667	0.489*	-0.379442	-0.0569163	-0.363946	0.15447	-0.182363
(37:3e)	784.621	0.405*	-0.575**	-0.106861	0.233367	0.437*	0.231735	0.614**	0.370679
(38:8)	802.538	-0.386478	0.169857	0.615**	-0.508*	-0.291343	-0.523**	-0.0856526	-0.430*
(38:9)	800.522	-0.584**	0.347124	0.318231	-0.259192	-0.426*	-0.377079	-0.25663	-0.487*
(39:3e)	812.653	0.0755567	-0.302147	0.289281	-0.193188	0.140895	-0.194372	0.317214	-0.0446716
(39:4e)	810.637	0.318236	-0.463*	-0.222504	0.304271	0.335274	0.28276	0.515*	0.329663
(40:1)	844.679	-0.369862	0.321006	-0.214268	0.16514	-0.282898	0.0396551	-0.252457	-0.206672
(42:0)	932.733	-0.32583	0.385691	-0.238702	0.170404	-0.268238	0.0833278	-0.293387	-0.170757
(43:0)	888.742	0.105222	0.0582066	-0.597**	0.503*	0.140701	0.451*	-0.00242127	0.25795
(44:0e)	888.778	0.427*	-0.371511	-0.256923	0.292121	0.368152	0.316778	0.369283	0.410*
(44:4)	894.695	0.373297	-0.541**	-0.0427427	0.18289	0.370483	0.224087	0.510*	0.331673
(46:0)	930.789	0.639**	-0.769**	-0.327978	0.461*	0.652**	0.460*	0.786**	0.609**
(47:1)	942.789	-0.711**	0.607**	0.930**	-0.910**	-0.679**	-0.885**	-0.584**	-0.781**
(47:5)	934.726	-0.26916	0.294557	-0.325159	0.252113	-0.19097	0.144637	-0.226823	-0.107001
(48:6)	946.726	-0.497*	0.410*	0.721**	-0.686**	-0.374723	-0.679**	-0.299075	-0.562**
PE
(14:0p/20:4)	696.496	-0.145075	0.206404	0.577**	-0.572**	-0.162245	-0.436*	-0.19984	-0.259092
(14:1e/20:4)	694.482	-0.211642	0.310962	0.606**	-0.633**	-0.255666	-0.475*	-0.382853	-0.323676
(15:0/16:1)	674.477	-0.695**	0.577**	0.948**	-0.930**	-0.657**	-0.897**	-0.592**	-0.780**
(15:0/18:2)	700.492	-0.654**	0.545**	0.887**	-0.849**	-0.634**	-0.815**	-0.592**	-0.731**
(16:0e/16:1)	674.513	-0.510*	0.247656	0.705**	-0.595**	-0.434*	-0.638**	-0.204342	-0.545**
(16:0e/18:3)	698.513	0.0434215	-0.284026	0.237542	-0.132191	0.0922632	-0.177513	0.362644	-0.008971
(16:1/14:0)	662.476	-0.677**	0.582**	0.936**	-0.896**	-0.647**	-0.854**	-0.576**	-0.738**
(16:1/14:1)	658.445	-0.732**	0.622**	0.962**	-0.954**	-0.708**	-0.910**	-0.657**	-0.804**
(16:1/18:3)	710.477	-0.29072	0.0906776	0.664**	-0.590**	-0.217123	-0.586**	-0.0662527	-0.386441
(16:1e)	474.259	0.208785	-0.414*	-0.356852	0.417*	0.299126	0.290129	0.542**	0.235229
(16:1e/15:0)	660.497	-0.395103	0.403872	0.783**	-0.774**	-0.419*	-0.656**	-0.449*	-0.506*
(16:1e/17:0)	688.529	-0.211687	0.147754	0.705**	-0.680**	-0.224599	-0.568**	-0.208546	-0.343157
(17:0e)	468.308	-0.195678	0.00744912	0.546**	-0.426*	-0.14136	-0.405*	0.0588652	-0.258574
(17:1e)	466.293	0.342457	-0.509*	-0.496*	0.565**	0.418*	0.470*	0.618**	0.404241
(18:0e/15:0)	690.544	-0.248575	-0.0123538	0.559**	-0.467*	-0.19518	-0.481*	0.0471247	-0.325357
(18:0e/20:3)	754.576	0.19156	-0.400545	0.184213	-0.0684366	0.248255	-0.0796806	0.417*	0.103285
(18:0e/22:4)	780.591	0.0790108	-0.317114	0.313694	-0.207348	0.0984496	-0.208776	0.328429	-0.0156776
(18:0p/15:0)	690.543	0.00587629	-0.133574	0.499*	-0.406*	-0.0135664	-0.319225	0.13128	-0.104328
(18:0p/17:0)	718.575	-0.254238	0.189232	0.715**	-0.669**	-0.26223	-0.567**	-0.199357	-0.374505
(18:1e/17:0)	716.56	-0.341495	0.298474	0.782**	-0.776**	-0.365523	-0.660**	-0.381078	-0.472*
(18:1e/19:0)	744.591	-0.326689	0.397916	0.704**	-0.747**	-0.374268	-0.601**	-0.488*	-0.451*
(18:1e/20:3)	752.56	-0.517**	0.458*	0.844**	-0.836**	-0.488*	-0.777**	-0.448*	-0.602**
(18:1e/22:0)	786.638	-0.166469	0.294908	0.532**	-0.582**	-0.23589	-0.421*	-0.406*	-0.272872
(18:1e/24:0)	814.67	-0.18808	0.336931	0.536**	-0.600**	-0.252961	-0.425*	-0.436*	-0.282804
(18:1e/24:2)	810.638	-0.197551	0.333601	0.550**	-0.601**	-0.252865	-0.441*	-0.467*	-0.318017
(18:2/20:4)	762.508	-0.024525	-0.188401	0.310661	-0.226511	0.0833434	-0.250064	0.284702	-0.0973828
(18:2e/22:6)	772.529	-0.502*	0.274148	0.517**	-0.510*	-0.446*	-0.556**	-0.236414	-0.538**
(18:2p/20:5)	746.512	-0.352256	0.246612	0.758**	-0.692**	-0.332105	-0.620**	-0.233886	-0.449*
(18:3e)	476.277	0.431*	-0.606**	-0.495*	0.582**	0.484*	0.504*	0.689**	0.476*
(18:4/20:5)	756.461	-0.412*	0.14284	0.286202	-0.206042	-0.283096	-0.345508	-0.012691	-0.344675
(19:0e)	496.34	0.00196163	-0.233861	0.296616	-0.128203	0.088513	-0.178507	0.335794	-0.0545188
(19:1e)	494.324	0.403645	-0.544**	-0.441*	0.509*	0.523**	0.376834	0.608**	0.428*
(19:4e)	488.277	0.486*	-0.664**	-0.480*	0.575**	0.523**	0.514*	0.736**	0.513*
(19:5e)	486.262	0.454*	-0.628**	-0.490*	0.587**	0.501*	0.511*	0.719**	0.492*
(20:0e)	510.355	0.367955	-0.560**	-0.348997	0.463*	0.405*	0.407*	0.647**	0.395846
(20:2e)	528.306	0.627**	-0.784**	-0.425*	0.542**	0.637**	0.519**	0.823**	0.603**
(21:5e)	514.293	0.460*	-0.639**	-0.479*	0.576**	0.517**	0.509*	0.715**	0.491*
(22:1e)	536.371	0.127709	-0.270116	-0.499*	0.539**	0.200667	0.407*	0.360338	0.249462
(22:2)	548.335	0.687**	-0.820**	-0.434*	0.550**	0.674**	0.544**	0.853**	0.653**
(22:5e)	550.29	0.567**	-0.740**	-0.482*	0.593**	0.601**	0.528**	0.799**	0.572**
(24:2)	576.366	0.616**	-0.768**	-0.390773	0.503*	0.601**	0.499*	0.808**	0.583**
(30:6)	650.383	-0.370462	0.339371	-0.199817	0.1767	-0.287944	0.0280089	-0.222024	-0.215851
(31:1e)	662.512	-0.501*	0.412*	0.841**	-0.814**	-0.451*	-0.754**	-0.421*	-0.606**
(31:6)	664.398	0.601**	-0.746**	-0.436*	0.542**	0.575**	0.489*	0.810**	0.604**
(32:1)	712.489	-0.141816	-0.0364773	0.516**	-0.400344	-0.0809026	-0.376451	0.0971753	-0.221102
(32:1e)	674.513	-0.583**	0.579**	0.871**	-0.900**	-0.585**	-0.818**	-0.615**	-0.683**
(33:1e)	690.543	0.13181	-0.221589	0.323726	-0.321869	0.102016	-0.247828	0.238961	-0.045204
(33:8)	688.398	0.422*	-0.585**	-0.527**	0.611**	0.454*	0.508*	0.719**	0.481*
(34:4e)	698.512	-0.235386	0.19202	0.686**	-0.611**	-0.231652	-0.499*	-0.193776	-0.326789
(35:1)	730.539	-0.426*	0.263537	0.829**	-0.773**	-0.415*	-0.722**	-0.305429	-0.547**
(36:0/18:2)	994.821	-0.225404	0.410*	-0.264804	0.15609	-0.209958	0.124864	-0.347774	-0.105539
(36:3e)	750.541	-0.656**	0.610**	0.919**	-0.914**	-0.639**	-0.851**	-0.630**	-0.734**
(38:1e)	782.603	0.146279	-0.357417	0.244824	-0.119167	0.165387	-0.108999	0.401733	0.061421
(40:3e)	782.607	-0.28634	0.407*	0.641**	-0.690**	-0.327533	-0.327533	-0.480*	-0.387529
(8:0e/8:0)	454.293	0.590**	-0.757**	-0.385393	0.507*	0.603**	0.603**	0.805**	0.567**
(8:1e/10:0)	502.29	0.313616	-0.473*	-0.551**	0.623**	0.376055	0.376055	0.593**	0.404333
PI
(16:0/20:3)	859.534	0.639**	-0.775**	-0.419*	0.519**	0.647**	0.647**	0.798**	0.614**
(17:0/18:2)	871.531	0.436*	-0.642**	-0.377628	0.484*	0.496*	0.496*	0.693**	0.442*
(18:0/18:1)	887.562	0.554**	-0.728**	-0.529**	0.620**	0.559**	0.559**	0.765**	0.576**
(18:0/20:5)	907.531	0.460*	-0.590**	-0.699**	0.741**	0.515**	0.515**	0.624**	0.546**
(18:0/22:5)	911.566	0.605**	-0.749**	-0.548**	0.635**	0.621**	0.621**	0.817**	0.617**
(18:0/22:6)	909.55	0.662**	-0.769**	-0.655**	0.736**	0.669**	0.669**	0.841**	0.695**
(18:1/18:2)	859.534	0.649**	-0.779**	-0.555**	0.648**	0.669**	0.669**	0.833**	0.660**
(18:1/20:3)	885.55	0.622**	-0.771**	-0.423*	0.537**	0.677**	0.677**	0.805**	0.590**
(18:1/20:5)	900.56	-0.344849	0.110744	0.24336	-0.145259	-0.204234	-0.204234	-0.0765819	-0.288181
(18:1/22:6)	907.534	0.672**	-0.767**	-0.691**	0.764**	0.681**	0.681**	0.837**	0.718**
(18:3/20:5)	896.528	0.186637	-0.352873	-0.537**	0.579**	0.259094	0.259094	0.413*	0.301255
(20:2/20:4)	909.55	0.608**	-0.754**	-0.654**	0.739**	0.638**	0.638**	0.828**	0.655**
(20:4/22:6)	929.519	0.617**	-0.767**	-0.511*	0.608**	0.622**	0.622**	0.824**	0.625**
(32:1)	807.503	0.119197	-0.113818	-0.596**	0.592**	0.179311	0.179311	0.255306	0.279849
(33:1)	821.519	0.433*	-0.535**	-0.652**	0.700**	0.482*	0.482*	0.654**	0.534**
(34:1)	835.534	0.353109	-0.417*	-0.684**	0.727**	0.3965	0.3965	0.566**	0.482*
(40:7)	926.575	0.669**	-0.797**	-0.614**	0.702**	0.676**	0.676**	0.830**	0.678**
PG
(16:0/16:1)	719.487	-0.618**	0.592**	0.887**	-0.899**	-0.610**	-0.610**	-0.597**	-0.701**
(16:1/14:0)	691.456	-0.717**	0.608**	0.948**	-0.942**	-0.697**	-0.697**	-0.635**	-0.798**
(16:1/16:1)	717.471	-0.620**	0.540**	0.908**	-0.891**	-0.616**	-0.616**	-0.534**	-0.699**
(16:1/18:1)	745.503	-0.602**	0.573**	0.885**	-0.896**	-0.598**	-0.598**	-0.591**	-0.689**
(17:1/16:1)	731.487	-0.707**	0.584**	0.956**	-0.948**	-0.685**	-0.685**	-0.623**	-0.795**
(18:0/17:0)	763.549	0.307604	-0.137091	-0.311288	0.235747	0.263692	0.263692	0.265461	0.360442
(18:1/20:5)	793.503	-0.409*	0.518**	0.682**	-0.748**	-0.443*	-0.443*	-0.604**	-0.501*
(37:0)	791.581	0.137319	-0.240242	0.326494	-0.281599	0.0666388	0.0666388	0.123227	-0.018031
(44:1)	889.689	0.625**	-0.777**	-0.435*	0.532**	0.708**	0.708**	0.787**	0.604**
PS
(16:0/18:2)	758.498	0.248177	-0.291745	-0.671**	0.686**	0.292902	0.292902	0.423*	0.40149
(16:0/22:6)	806.498	0.140688	-0.143374	-0.615**	0.607**	0.210881	0.210881	0.291498	0.299047
(18:0/20:1)	816.576	0.436*	-0.499*	-0.718**	0.752**	0.473*	0.473*	0.646**	0.546**
(18:0/20:2)	838.557	0.607**	-0.747**	-0.633**	0.711**	0.642**	0.642**	0.792**	0.643**
(18:0/22:5)	838.559	0.644**	-0.775**	-0.612**	0.695**	0.656**	0.656**	0.817**	0.663**
(18:0/22:6)	834.529	0.380969	-0.449*	-0.689**	0.731**	0.413*	0.413*	0.593**	0.505*
(18:1/18:1)	786.529	0.511*	-0.506*	-0.827**	0.847**	0.540**	0.540**	0.621**	0.638**
(20:2/20:5)	832.513	0.446*	-0.574**	-0.582**	0.668**	0.456*	0.456*	0.710**	0.532**
(22:0/18:2)	842.592	0.664**	-0.764**	-0.735**	0.772**	0.701**	0.701**	0.767**	0.710**
(24:1/20:4)	892.607	0.554**	-0.581**	-0.701**	0.704**	0.523**	0.523**	0.638**	0.675**
(34:3e)	742.503	-0.307523	0.291874	0.744**	-0.741**	-0.34624	-0.34624	-0.395689	-0.431*
(36:5e)	766.503	-0.261571	0.367719	0.601**	-0.657**	-0.336587	-0.336587	-0.497*	-0.402663
(37:3e)	784.55	-0.370865	0.31616	0.789**	-0.789**	-0.386718	-0.386718	-0.422*	-0.501*
(38:2e)	800.581	-0.373462	0.356425	-0.213597	0.165138	-0.295851	-0.295851	-0.257871	-0.208363
(42:8)	860.544	0.539**	-0.708**	-0.532**	0.617**	0.555**	0.555**	0.737**	0.568**
(42:8e)	844.55	-0.304235	0.319305	0.724**	-0.752**	-0.332937	-0.332937	-0.416*	-0.428*
(43:5)	878.592	0.624**	-0.764**	-0.570**	0.667**	0.663**	0.663**	0.839**	0.656**
LPC
(18:2e)	506.361	-0.442*	0.32411	0.480*	-0.370394	-0.35124	-0.361892	-0.162867	-0.364711
(20:0)	574.384	-0.938**	0.810**	0.708**	-0.706**	-0.813**	-0.792**	-0.686**	-0.869**
(20:2e)	534.392	0.310316	-0.0294079	-0.518**	0.439*	0.286454	0.534**	-0.0213644	0.392683
LPE
(14:0)	426.262	0.352981	-0.567**	-0.376235	0.481*	0.410*	0.396992	0.648**	0.393262
(15:0)	440.277	0.510*	-0.664**	-0.405*	0.488*	0.531**	0.467*	0.718**	0.498*
(16:1)	474.259	0.211204	-0.416*	-0.359601	0.420*	0.301429	0.293234	0.544**	0.238536
(17:0)	490.29	-0.11455	-0.085473	0.522**	-0.416*	-0.0846382	-0.397044	0.123807	-0.20823
(17:1)	488.275	0.372215	-0.544**	-0.534**	0.625**	0.433*	0.498*	0.660**	0.451*
(18:2e)	486.295	-0.587**	0.571**	0.886**	-0.884**	-0.578**	-0.802**	-0.596**	-0.673**
(18:3)	476.277	0.613**	-0.780**	-0.440*	0.552**	0.628**	0.521**	0.818**	0.594**
(18:4)	472.247	0.373793	-0.524**	-0.508*	0.581**	0.409*	0.467*	0.648**	0.451*
(19:1)	492.31	0.518**	-0.699**	-0.453*	0.565**	0.517**	0.485*	0.793**	0.548**
(22:2)	532.341	0.460*	-0.643**	-0.524**	0.629**	0.506*	0.524**	0.748**	0.508*
(22:3)	530.325	0.629**	-0.785**	-0.412*	0.523**	0.636**	0.480*	0.824**	0.606**
(22:4)	528.31	0.607**	-0.730**	-0.426*	0.516**	0.592**	0.472*	0.770**	0.607**
(24:2)	560.372	0.354277	-0.517**	-0.523**	0.602**	0.405*	0.477*	0.642**	0.435*
LPI
(16:0)	571.289	0.267762	-0.381355	-0.491*	0.550**	0.284626	0.441*	0.548**	0.371633
(18:1)	597.305	0.292668	-0.406*	-0.518**	0.570**	0.317365	0.461*	0.556**	0.393717
(18:2)	595.289	0.331183	-0.453*	-0.504*	0.565**	0.346809	0.454*	0.594**	0.423*
(20:4)	619.289	0.514*	-0.610**	-0.584**	0.639**	0.520**	0.565**	0.709**	0.581**
(20:5)	617.273	0.306918	-0.389784	-0.567**	0.609**	0.326328	0.503*	0.543**	0.421*
LPG
(16:1)	481.257	-0.707**	0.615**	0.924**	-0.917**	-0.655**	-0.898**	-0.596**	-0.789**
(18:2)	507.273	-0.440*	0.514*	0.102319	-0.186394	-0.380962	-0.18522	-0.459*	-0.335285
LPS
(18:1)	546.28	0.514*	-0.643**	-0.621**	0.694**	0.567**	0.629**	0.718**	0.569**
(18:2)	544.265	0.444*	-0.560**	-0.641**	0.699**	0.496*	0.618**	0.643**	0.529**
(20:3)	570.28	0.488*	-0.555**	-0.710**	0.753**	0.527**	0.689**	0.645**	0.583**
(20:5)	566.249	0.581**	-0.656**	-0.750**	0.818**	0.597**	0.729**	0.774**	0.669**
(22:6)	570.283	0.463*	-0.531**	-0.715**	0.752**	0.509*	0.683**	0.613**	0.564**
Cer
(d12:0/20:1)	554.479	-0.332102	0.374996	-0.244307	0.186517	-0.268313	0.0807657	-0.252248	-0.166221
(d12:0/21:1)	568.495	-0.227809	0.367722	-0.320796	0.229031	-0.187231	0.170202	-0.276155	-0.0758236
(d12:0/22:1)	582.51	-0.187331	0.216415	-0.385791	0.331973	-0.112274	0.217743	-0.143959	-0.0393602
(d14:2/19:0)	566.479	-0.261232	0.458*	-0.205514	0.0772507	-0.251148	0.0700537	-0.385331	-0.155464
(d14:2/20:0)	580.495	-0.0572243	0.271969	-0.361216	0.250152	-0.103026	0.274669	-0.217217	0.0585508
(d14:2/23:0)	622.542	-0.457*	0.478*	0.103973	-0.136281	-0.401457	-0.194909	-0.303954	-0.369555
(d15:1/18:0)	524.504	0.243703	-0.436*	-0.511*	0.568**	0.320481	0.455*	0.498*	0.33773
(d15:1/20:1)	594.51	-0.0730916	0.27905	-0.345893	0.245042	-0.103349	0.24313	-0.184405	0.031981
(d16:1/18:3)	532.472	-0.0948649	-0.0920751	0.453*	-0.341426	-0.051159	-0.325784	0.159883	-0.166748
(d18:1/23:2)	632.598	-0.627**	0.494*	0.913**	-0.881**	-0.606**	-0.840**	-0.506*	-0.699**
(d30:0)	528.463	-0.543**	0.615**	0.0220991	-0.0993907	-0.480*	-0.172626	-0.489*	-0.398196
(d34:3)	578.479	-0.228466	0.388878	-0.293846	0.197682	-0.207334	0.146156	-0.280524	-0.0687398
(m31:0+O)	542.479	-0.625**	0.736**	0.174909	-0.257366	-0.560**	-0.298822	-0.635**	-0.487*
(t39:6)	612.5	-0.384407	0.368171	-0.194221	0.159882	-0.3034	0.0182829	-0.237148	-0.230495
HexCer
(d16:2/20:4)	762.516	0.0293574	-0.226002	0.238681	-0.119727	0.103916	-0.140166	0.349104	-0.0124841
(d34:3)	740.532	-0.402476	0.349366	-0.145429	0.125385	-0.352866	0.000168108	-0.222522	-0.24761
(t17:1/20:5)	746.521	-0.464*	0.297509	0.794**	-0.735**	-0.424*	-0.725**	-0.269127	-0.547**
(t20:1/22:6)	860.589	-0.282198	0.056811	0.656**	-0.565**	-0.22717	-0.560**	-0.0449336	-0.376091
(t34:2)	758.542	-0.270469	0.427*	0.554**	-0.621**	-0.326594	-0.456*	-0.511*	-0.353267
(t36:2)	800.589	-0.0451306	-0.216394	0.37931	-0.279212	-0.0191265	-0.28841	0.229568	-0.11688
(d30:1)	804.548	-0.617**	0.508*	0.918**	-0.894**	-0.602**	-0.855**	-0.512*	-0.702**
SM
(d16:1/22:3)	753.591	0.261738	-0.339343	0.0422096	0.0421701	0.206739	0.206739	0.353516	0.243438
(d32:1)	675.544	-0.310686	0.3095	-0.283531	0.181503	-0.229115	-0.229115	-0.266976	-0.15576
(t39:4)	783.601	0.293199	-0.505*	0.0655138	0.0683776	0.302279	0.302279	0.504*	0.228251
(t39:6)	779.57	-0.200921	0.17733	0.667**	-0.639**	-0.217565	-0.217565	-0.189514	-0.315358
(t41:7)	805.585	0.116583	-0.32139	0.271699	-0.144785	0.170911	0.170911	0.372705	0.0279412
DG
(16:0/23:0)	684.65	-0.698**	0.558**	0.928**	-0.917**	-0.668**	-0.894**	-0.574**	-0.800**
(16:0/24:0)	698.666	0.334252	-0.0219297	-0.434*	0.301108	0.272615	0.421*	0.0352462	0.329552
(16:1/18:3)	606.509	0.516**	-0.672**	-0.204438	0.331715	0.490*	0.351313	0.718**	0.478*
(17:0/17:0)	614.572	-0.507*	0.349684	0.835**	-0.763**	-0.466*	-0.737**	-0.324121	-0.588**
(18:0/17:0)	628.587	-0.568**	0.424*	0.881**	-0.832**	-0.527**	-0.801**	-0.414*	-0.659**
(18:2)	386.29	0.466*	-0.644**	-0.326529	0.447*	0.510*	0.409*	0.715**	0.468*
(18:2e)	355.284	-0.696**	0.590**	0.939**	-0.907**	-0.650**	-0.878**	-0.579**	-0.766**
(18:3/18:3)	630.509	-0.388824	0.387054	0.631**	-0.496*	-0.357785	-0.484*	-0.38942	-0.375638
(19:0/20:5)	674.572	0.442*	-0.600**	-0.0407394	0.173688	0.462*	0.208815	0.608**	0.384634
(20:0/18:2)	671.558	-0.466*	0.270756	0.775**	-0.703**	-0.412*	-0.683**	-0.240613	-0.549**
(20:1/22:5)	714.603	0.802**	-0.628**	-0.644**	0.636**	0.735**	0.761**	0.608**	0.820**
(26:5e)	478.389	-0.164816	0.138964	0.16105	-0.0513338	-0.129508	-0.10972	-0.0208514	-0.119134
(30:1e)	547.47	0.939**	-0.860**	-0.638**	0.687**	0.881**	0.765**	0.838**	0.897**
(31:0e)	563.501	0.940**	-0.854**	-0.625**	0.679**	0.869**	0.779**	0.825**	0.896**
(31:1e)	561.485	0.918**	-0.864**	-0.613**	0.672**	0.862**	0.741**	0.848**	0.883**
(33:0)	600.556	-0.495*	0.327389	0.834**	-0.762**	-0.455*	-0.728**	-0.311287	-0.585**
(34:2)	593.514	-0.658**	0.510*	0.908**	-0.881**	-0.604**	-0.860**	-0.508*	-0.743**
(34:5e)	573.488	0.797**	-0.793**	-0.509*	0.602**	0.752**	0.673**	0.822**	0.770**
(36:0)	625.577	-0.26867	0.262083	-0.124502	0.160957	-0.216295	0.0605531	-0.250078	-0.150523
(36:0e)	633.579	0.937**	-0.861**	-0.643**	0.703**	0.866**	0.792**	0.849**	0.902**
(36:2)	621.545	-0.416*	0.229192	0.775**	-0.705**	-0.382267	-0.682**	-0.213044	-0.521**
(37:1)	654.603	-0.534**	0.383267	0.851**	-0.805**	-0.490*	-0.780**	-0.363842	-0.633**
(38:3e)	633.582	0.937**	-0.861**	-0.643**	0.703**	0.866**	0.792**	0.849**	0.902**
(39:0)	684.65	-0.17836	-0.026458	0.331347	-0.17112	-0.100251	-0.245736	0.145098	-0.171201
(41:0)	712.681	-0.820**	0.649**	0.904**	-0.860**	-0.740**	-0.895**	-0.572**	-0.847**
(43:0)	740.713	-0.124741	0.165743	-0.394697	0.38443	-0.0645623	0.269679	-0.0587673	0.0332756
(44:7)	740.619	-0.360988	0.268202	0.774**	-0.709**	-0.356933	-0.631**	-0.285051	-0.472*
(49:1)	822.791	0.606**	-0.752**	-0.296605	0.427*	0.618**	0.434*	0.775**	0.565**
(50:3)	832.775	0.628**	-0.773**	-0.345506	0.472*	0.638**	0.463*	0.807**	0.592**
(51:1)	850.822	0.654**	-0.788**	-0.383183	0.505*	0.658**	0.500*	0.820**	0.625**
(51:2)	848.807	0.619**	-0.762**	-0.346078	0.468*	0.645**	0.450*	0.794**	0.586**
(52:0)	866.854	0.495*	-0.634**	-0.0832194	0.212804	0.503*	0.239825	0.656**	0.429*
(52:3)	860.807	0.627**	-0.767**	-0.338485	0.464*	0.633**	0.456*	0.800**	0.592**
(53:2)	876.838	0.628**	-0.762**	-0.351855	0.476*	0.620**	0.470*	0.799**	0.599**
(53:3)	874.822	0.600**	-0.750**	-0.319273	0.441*	0.641**	0.407*	0.769**	0.565**
(55:2)	904.869	0.569**	-0.730**	-0.33435	0.449*	0.593**	0.440*	0.762**	0.541**
TG
(10:0/10:1/18:1)	680.582	0.713**	-0.809**	-0.440*	0.547**	0.748**	0.748**	0.846**	0.666**
(10:0/18:2/18:2)	788.676	0.906**	-0.880**	-0.648**	0.714**	0.873**	0.873**	0.881**	0.883**
(11:0/14:0/18:1)	752.676	0.802**	-0.872**	-0.550**	0.650**	0.835**	0.835**	0.883**	0.778**
(11:0/16:1/18:2)	776.676	0.670**	-0.802**	-0.431*	0.544**	0.680**	0.680**	0.829**	0.644**
(11:0/18:1/18:2)	804.708	0.735**	-0.810**	-0.460*	0.568**	0.737**	0.737**	0.811**	0.711**
(11:0/18:2/18:2)	802.692	0.674**	-0.801**	-0.430*	0.545**	0.664**	0.664**	0.836**	0.653**
(11:0/18:2/18:3)	800.676	0.635**	-0.778**	-0.38975	0.508*	0.639**	0.639**	0.814**	0.609**
(12:0/18:2/18:2)	821.663	0.863**	-0.884**	-0.596**	0.680**	0.845**	0.845**	0.881**	0.834**
(12:0e/11:4/18:1)	702.603	-0.160745	-0.0535102	0.554**	-0.444*	-0.118828	-0.118828	0.0851112	-0.253234
(12:0e/6:0/20:3)	647.561	-0.184541	0.0241642	0.125719	-0.0335659	-0.169863	-0.169863	-0.0177098	-0.0871191
(12:1e/6:0/18:4)	632.525	0.420*	-0.519**	-0.0809262	0.152215	0.333929	0.333929	0.545**	0.334247
(14:0/14:0/18:3)	790.692	0.851**	-0.840**	-0.585**	0.661**	0.835**	0.835**	0.837**	0.831**
(14:0/14:0/20:3)	801.697	-0.909**	0.790**	0.936**	-0.932**	-0.847**	-0.847**	-0.749**	-0.939**
(14:0/18:2/20:5)	871.679	0.761**	-0.759**	-0.490*	0.574**	0.749**	0.749**	0.758**	0.732**
(14:0/20:5/20:5)	871.681	0.741**	-0.839**	-0.500*	0.600**	0.751**	0.751**	0.868**	0.713**
(14:0e/10:4/11:4)	617.418	-0.390261	0.375571	-0.196596	0.139223	-0.296797	-0.296797	-0.29107	-0.228223
(14:0e/18:2/18:2)	830.76	0.607**	-0.753**	-0.332799	0.457*	0.614**	0.614**	0.791**	0.575**
(15:0/14:0/18:2)	806.723	0.802**	-0.849**	-0.513*	0.615**	0.792**	0.792**	0.836**	0.758**
(15:0/18:2/20:5)	880.739	0.887**	-0.704**	-0.612**	0.623**	0.785**	0.785**	0.655**	0.849**
(15:0/18:2/22:6)	911.71	0.876**	-0.716**	-0.590**	0.628**	0.789**	0.789**	0.672**	0.833**
(15:0/18:3/20:5)	878.723	0.827**	-0.876**	-0.535**	0.633**	0.804**	0.804**	0.867**	0.787**
(15:0/18:3/22:6)	904.739	0.830**	-0.859**	-0.541**	0.629**	0.807**	0.807**	0.864**	0.802**
(16:0/10:0/16:1)	738.661	0.939**	-0.805**	-0.734**	0.746**	0.887**	0.887**	0.785**	0.921**
(16:0/10:0/22:6)	812.676	0.520**	-0.682**	-0.263721	0.397403	0.525**	0.525**	0.726**	0.498*
(16:0/12:3/16:0)	762.661	0.774**	-0.722**	-0.569**	0.622**	0.825**	0.825**	0.675**	0.733**
(16:0/16:0/20:1)	878.817	0.367879	-0.167918	-0.274143	0.201609	0.299377	0.299377	0.0687105	0.361847
(16:0/16:0/20:3)	857.759	0.524**	-0.257596	-0.397	0.315361	0.399512	0.399512	0.247199	0.530**
(16:0/16:0/22:6)	896.77	0.764**	-0.817**	-0.497*	0.586**	0.660**	0.660**	0.854**	0.739**
(16:0/16:1/18:1)	848.77	0.567**	-0.534**	-0.460*	0.442*	0.437*	0.437*	0.599**	0.512*
(16:0/17:0/20:4)	886.786	0.890**	-0.861**	-0.590**	0.648**	0.872**	0.872**	0.835**	0.834**
(16:0/17:0/22:6)	910.786	0.943**	-0.858**	-0.641**	0.693**	0.877**	0.877**	0.832**	0.903**
(16:0/18:1/22:1)	937.819	0.952**	-0.820**	-0.693**	0.735**	0.880**	0.880**	0.791**	0.920**
(16:0/18:1/22:6)	927.741	0.514*	-0.203878	-0.456*	0.385596	0.431*	0.431*	0.1358	0.508*
(16:0/18:1/24:1)	965.851	0.935**	-0.788**	-0.660**	0.685**	0.860**	0.860**	0.756**	0.900**
(16:0/18:2/18:2)	872.77	0.925**	-0.845**	-0.618**	0.671**	0.857**	0.857**	0.824**	0.886**
(16:0/18:2/21:0)	923.804	0.921**	-0.751**	-0.635**	0.650**	0.841**	0.841**	0.703**	0.880**
(16:0/18:2/22:4)	924.801	0.871**	-0.721**	-0.598**	0.622**	0.809**	0.809**	0.705**	0.852**
(16:0/18:2/22:6)	925.726	0.739**	-0.465*	-0.581**	0.536**	0.652**	0.652**	0.403375	0.712**
(16:0/18:2/23:0)	946.88	0.933**	-0.861**	-0.627**	0.681**	0.871**	0.871**	0.837**	0.893**
(16:0/18:3/22:6)	918.755	0.924**	-0.879**	-0.616**	0.684**	0.860**	0.860**	0.856**	0.881**
(16:0/19:0/19:0)	891.838	0.933**	-0.856**	-0.621**	0.674**	0.868**	0.868**	0.829**	0.889**
(16:0/19:0/22:6)	938.817	0.941**	-0.821**	-0.650**	0.688**	0.865**	0.865**	0.788**	0.902**
(16:0/20:5/23:0)	968.864	0.919**	-0.770**	-0.658**	0.683**	0.823**	0.823**	0.757**	0.896**
(16:0/22:4/23:0)	981.884	0.932**	-0.836**	-0.618**	0.664**	0.868**	0.868**	0.806**	0.891**
(16:0/22:6/22:6)	973.726	0.819**	-0.573**	-0.609**	0.578**	0.727**	0.727**	0.512*	0.789**
(16:0/22:6/23:0)	994.88	0.887**	-0.741**	-0.625**	0.634**	0.820**	0.820**	0.712**	0.877**
(16:0/8:0/16:0)	695.618	-0.372013	0.351636	0.252839	-0.169237	-0.335005	-0.335005	-0.219781	-0.315425
(16:0e/10:1/10:1)	621.545	-0.560**	0.405*	0.873**	-0.821**	-0.523**	-0.523**	-0.391494	-0.652**
(16:0e/12:2/12:2)	673.577	-0.263306	0.140931	0.423*	-0.412*	-0.350162	-0.350162	-0.0884458	-0.303628
(16:0e/16:0/16:0)	815.746	-0.484*	0.308549	0.845**	0.845**	-0.457*	-0.748**	-0.304115	-0.575**
(16:0e/18:2/18:3)	856.775	0.603**	-0.754**	-0.324733	-0.324733	0.617**	0.436*	0.792**	0.569**
(16:0e/22:6/22:6)	954.791	0.921**	-0.823**	-0.615**	-0.615**	0.846**	0.756**	0.775**	0.863**
(16:1/12:0/16:1)	764.676	0.946**	-0.827**	-0.689**	-0.689**	0.882**	0.821**	0.800**	0.920**
(16:1/13:0/16:1)	778.692	0.753**	-0.844**	-0.500*	-0.500*	0.724**	0.604**	0.871**	0.728**
(16:1/14:0/16:1)	792.708	0.911**	-0.881**	-0.624**	-0.624**	0.874**	0.758**	0.871**	0.876**
(16:1/18:1/18:1)	874.786	0.743**	-0.642**	-0.530**	-0.530**	0.642**	0.580**	0.666**	0.706**
(16:1/18:2/18:3)	873.694	0.870**	-0.887**	-0.595**	-0.595**	0.876**	0.709**	0.869**	0.826**
(16:1/18:3/18:3)	871.679	0.689**	-0.766**	-0.441*	-0.441*	0.621**	0.567**	0.803**	0.672**
(16:1/20:4/24:1)	980.864	0.936**	-0.876**	-0.629**	-0.629**	0.871**	0.782**	0.848**	0.889**
(16:1e/16:0/18:2)	832.775	0.653**	-0.787**	-0.364624	-0.364624	0.663**	0.482*	0.817**	0.616**
(16:1e/16:0/24:1)	918.885	0.642**	-0.777**	-0.379432	-0.379432	0.637**	0.504*	0.816**	0.611**
(16:1e/18:1/18:2)	858.791	0.594**	-0.746**	-0.307487	-0.307487	0.597**	0.425*	0.783**	0.559**
(17:0/18:2/18:3)	884.77	0.931**	-0.881**	-0.635**	-0.635**	0.903**	0.757**	0.854**	0.890**
(17:0/18:2/20:4)	910.786	0.823**	-0.832**	-0.528**	-0.528**	0.799**	0.675**	0.843**	0.793**
(17:0/18:2/22:5)	936.801	0.879**	-0.814**	-0.574**	-0.574**	0.761**	0.731**	0.804**	0.837**
(17:0/22:6/22:6)	982.786	0.889**	-0.785**	-0.573**	-0.573**	0.773**	0.747**	0.689**	0.834**
(18:0/16:0/18:2)	876.801	0.405*	-0.25538	-0.284977	-0.284977	0.338254	0.339555	0.0789485	0.321312
(18:0/16:0/22:6)	924.801	0.768**	-0.507*	-0.557**	-0.557**	0.669**	0.673**	0.429*	0.729**
(18:0/18:1/22:6)	950.817	0.867**	-0.647**	-0.612**	-0.612**	0.759**	0.735**	0.586**	0.813**
(18:0/18:2/18:2)	900.801	0.740**	-0.698**	-0.466*	-0.466*	0.726**	0.616**	0.709**	0.656**
(18:0/20:1/20:5)	952.833	0.902**	-0.752**	-0.614**	-0.614**	0.837**	0.756**	0.706**	0.854**
(18:0/22:6/22:6)	996.801	0.789**	-0.560**	-0.554**	-0.554**	0.733**	0.684**	0.498*	0.723**
(18:0/22:6/24:0)	1036.93	0.862**	-0.689**	-0.602**	-0.602**	0.790**	0.735**	0.643**	0.826**
(18:0e/16:0/16:0)	843.778	-0.0921031	-0.0700296	0.557**	0.557**	-0.0600596	-0.416*	0.0792981	-0.199952
(18:0e/18:1/18:2)	888.838	0.626**	-0.763**	-0.337416	-0.337416	0.633**	0.459*	0.796**	0.591**
(18:0e/18:1/22:6)	936.838	0.938**	-0.813**	-0.634**	-0.634**	0.863**	0.778**	0.776**	0.896**
(18:0e/20:1/22:6)	964.869	0.925**	-0.868**	-0.636**	-0.636**	0.869**	0.780**	0.857**	0.895**
(18:0e/22:1/22:6)	992.9	0.912**	-0.873**	-0.643**	-0.643**	0.878**	0.783**	0.861**	0.884**
(18:0e/22:6/22:6)	982.822	0.611**	-0.315805	-0.478*	-0.478*	0.509*	0.568**	0.235437	0.586**
(18:0e/6:0/11:1)	626.572	-0.194803	0.019058	0.577**	0.577**	-0.270233	-0.427*	-0.117919	-0.240224
(18:0e/9:0/9:0)	642.603	-0.414*	0.268836	0.738**	0.738**	-0.322537	-0.655**	-0.203409	-0.507*
(18:1/10:1/10:1)	678.567	0.808**	-0.879**	-0.582**	-0.582**	0.771**	0.692**	0.907**	0.783**
(18:1/12:0/14:0)	766.692	0.949**	-0.823**	-0.691**	-0.691**	0.887**	0.822**	0.800**	0.915**
(18:1/12:3/18:1)	814.692	0.923**	-0.845**	-0.705**	-0.705**	0.880**	0.826**	0.840**	0.914**
(18:1/18:1/21:1)	949.819	0.942**	-0.792**	-0.658**	-0.658**	0.859**	0.797**	0.755**	0.903**
(18:1/18:1/22:4)	935.806	0.900**	-0.730**	-0.625**	-0.625**	0.824**	0.769**	0.680**	0.865**
(18:1/18:1/22:5)	955.773	0.740**	-0.476*	-0.525**	-0.525**	0.655**	0.624**	0.424*	0.719**
(18:1/18:1/22:6)	953.757	0.633**	-0.333645	-0.500*	-0.500*	0.574**	0.585**	0.245446	0.616**
(18:1/18:1/23:0)	979.866	0.938**	-0.823**	-0.638**	-0.638**	0.860**	0.787**	0.791**	0.899**
(18:1/18:1/23:1)	977.851	0.940**	-0.810**	-0.643**	-0.643**	0.868**	0.782**	0.763**	0.894**
(18:1/18:1/24:0)	993.882	0.932**	-0.774**	-0.653**	-0.653**	0.852**	0.797**	0.728**	0.892**
(18:1/18:2/18:3)	896.77	0.513*	-0.624**	-0.296017	-0.296017	0.673**	0.405*	0.621**	0.457*
(18:1/18:2/21:1)	942.848	0.895**	-0.868**	-0.582**	-0.582**	0.855**	0.723**	0.853**	0.856**
(18:1/18:2/22:0)	963.835	0.946**	-0.799**	-0.674**	-0.674**	0.864**	0.816**	0.763**	0.909**
(18:1/18:2/22:1)	961.819	0.957**	-0.831**	-0.721**	-0.721**	0.902**	0.847**	0.812**	0.928**
(18:1/18:2/22:5)	953.757	0.667**	-0.385862	-0.526**	-0.526**	0.547**	0.622**	0.352419	0.654**
(18:1/18:2/22:6)	951.741	0.804**	-0.574**	-0.596**	-0.596**	0.728**	0.716**	0.527**	0.792**
(18:1/18:2/24:0)	991.866	0.932**	-0.787**	-0.651**	-0.651**	0.857**	0.794**	0.743**	0.891**
(18:1/20:2/22:5)	976.833	0.942**	-0.835**	-0.647**	-0.647**	0.876**	0.795**	0.806**	0.906**
(18:1/20:4/22:1)	980.864	0.921**	-0.780**	-0.650**	-0.650**	0.833**	0.780**	0.750**	0.897**
(18:1/20:4/23:0)	996.895	0.804**	-0.820**	-0.531**	-0.531**	0.768**	0.653**	0.807**	0.767**
(18:1/20:4/24:0)	1010.91	0.853**	-0.779**	-0.574**	-0.574**	0.827**	0.707**	0.766**	0.846**
(18:1/20:4/24:1)	1008.9	0.901**	-0.771**	-0.607**	-0.607**	0.849**	0.764**	0.728**	0.851**
(18:1/20:5/20:5)	925.728	0.725**	-0.453*	-0.573**	-0.573**	0.646**	0.668**	0.398321	0.706**
(18:1/20:5/22:0)	980.864	0.818**	-0.624**	-0.533**	-0.533**	0.727**	0.694**	0.512*	0.780**
(18:1/20:5/22:6)	973.726	0.903**	-0.891**	-0.621**	-0.621**	0.866**	0.748**	0.891**	0.870**
(18:1/20:5/23:0)	994.88	0.945**	-0.845**	-0.646**	-0.646**	0.867**	0.791**	0.813**	0.904**
(18:1/21:1/22:6)	990.848	0.929**	-0.814**	-0.640**	-0.640**	0.855**	0.799**	0.801**	0.898**
(18:1/22:0/22:6)	1006.88	0.916**	-0.763**	-0.664**	-0.664**	0.869**	0.746**	0.722**	0.883**
(18:1/22:1/22:6)	1004.86	0.956**	-0.820**	-0.699**	-0.699**	0.876**	0.828**	0.791**	0.928**
(18:1/22:4/22:6)	998.817	0.890**	-0.789**	-0.592**	-0.592**	0.794**	0.751**	0.742**	0.847**
(18:1/22:5/23:0)	1022.91	0.913**	-0.748**	-0.631**	-0.631**	0.823**	0.774**	0.683**	0.869**
(18:1/22:5/24:0)	1036.93	0.766**	-0.573**	-0.529**	-0.529**	0.698**	0.634**	0.452*	0.715**
(18:1/22:6/22:6)	994.786	0.852**	-0.627**	-0.609**	-0.609**	0.755**	0.736**	0.559**	0.816**
(18:1/22:6/23:0)	1020.9	0.896**	-0.719**	-0.630**	-0.630**	0.827**	0.762**	0.661**	0.859**
(18:1/22:6/24:0)	1034.91	0.870**	-0.702**	-0.609**	-0.609**	0.738**	0.750**	0.622**	0.817**
(18:1/22:6/24:1)	1032.9	0.925**	-0.746**	-0.658**	-0.658**	0.827**	0.796**	0.715**	0.903**
(18:1/24:1/24:1)	1071	0.952**	-0.863**	-0.657**	-0.657**	0.875**	0.800**	0.839**	0.918**
(18:1e/11:1/11:1)	675.592	-0.523**	0.435*	0.861**	0.861**	-0.503*	-0.774**	-0.428*	-0.625**
(18:1e/15:0/16:0)	822.791	0.535**	-0.697**	-0.247703	-0.247703	0.564**	0.38898	0.728**	0.497*
(18:1e/16:0/18:2)	860.807	0.627**	-0.768**	-0.338567	-0.338567	0.633**	0.456*	0.800**	0.592**
(18:1e/16:0/20:1)	890.854	0.656**	-0.784**	-0.373939	-0.373939	0.652**	0.496*	0.815**	0.624**
(18:1e/18:1/18:2)	886.822	0.605**	-0.755**	-0.315708	-0.315708	0.615**	0.435*	0.789**	0.568**
(18:1e/18:1/22:6)	934.822	0.932**	-0.843**	-0.614**	-0.614**	0.863**	0.769**	0.815**	0.889**
(18:2/13:0/18:2)	835.679	0.849**	-0.878**	-0.551**	-0.551**	0.836**	0.679**	0.880**	0.809**
(18:2/14:3/18:2)	821.665	0.862**	-0.883**	-0.595**	-0.595**	0.844**	0.716**	0.880**	0.833**
(18:2/17:1/22:6)	932.77	0.889**	-0.882**	-0.587**	-0.587**	0.832**	0.725**	0.859**	0.852**
(18:2/18:2/21:1)	940.833	0.929**	-0.807**	-0.649**	-0.649**	0.876**	0.760**	0.749**	0.877**
(18:2/18:2/23:0)	975.835	0.932**	-0.786**	-0.641**	-0.641**	0.845**	0.789**	0.745**	0.895**
(18:2/18:2/23:1)	968.864	0.859**	-0.771**	-0.570**	-0.570**	0.806**	0.726**	0.766**	0.833**
(18:2/22:6/22:6)	992.77	0.913**	-0.744**	-0.639**	-0.639**	0.825**	0.777**	0.697**	0.876**
(18:2/22:6/23:0)	1018.88	0.908**	-0.753**	-0.632**	-0.632**	0.842**	0.776**	0.706**	0.865**
(18:2e/15:0/18:3)	842.76	0.602**	-0.757**	-0.3354	-0.3354	0.620**	0.447*	0.795**	0.567**
(18:3/13:0/18:2)	828.708	0.783**	-0.856**	-0.506*	-0.506*	0.769**	0.630**	0.868**	0.751**
(18:3/13:0/18:3)	826.692	0.685**	-0.767**	-0.419*	-0.419*	0.680**	0.561**	0.794**	0.661**
(18:3/17:1/22:6)	930.755	0.788**	-0.841**	-0.499*	-0.499*	0.794**	0.643**	0.812**	0.752**
(18:3/18:2/22:6)	947.71	0.928**	-0.841**	-0.627**	-0.627**	0.869**	0.778**	0.811**	0.890**
(18:3/18:2/23:1)	966.848	0.881**	-0.706**	-0.624**	-0.624**	0.747**	0.785**	0.696**	0.855**
(18:3/18:3/18:3)	895.679	0.659**	-0.704**	-0.430*	-0.430*	0.682**	0.578**	0.746**	0.658**
(18:3/22:6/22:6)	973.728	0.819**	-0.573**	-0.609**	-0.609**	0.727**	0.729**	0.512*	0.789**
(18:4/18:3/18:3)	888.708	0.666**	-0.799**	-0.508*	-0.508*	0.664**	0.592**	0.854**	0.665**
(19:0/18:1/18:2)	921.788	0.938**	-0.811**	-0.650**	-0.650**	0.857**	0.797**	0.786**	0.898**
(19:0/18:1/20:5)	921.791	0.938**	-0.810**	-0.650**	-0.650**	0.857**	0.798**	0.786**	0.898**
(19:0/18:1/22:5)	966.848	0.840**	-0.816**	-0.548**	-0.548**	0.800**	0.693**	0.817**	0.817**
(19:0/18:1/22:6)	964.833	0.945**	-0.822**	-0.653**	-0.653**	0.868**	0.798**	0.782**	0.906**
(19:0/22:1/22:1)	1030.97	0.946**	-0.872**	-0.645**	-0.645**	0.883**	0.790**	0.846**	0.905**
(19:1/14:2/19:1)	872.77	0.397604	-0.377854	-0.238057	-0.238057	0.364994	0.277903	0.387585	0.382912
(19:1/16:0/18:2)	888.801	0.857**	-0.836**	-0.569**	-0.569**	0.748**	0.683**	0.838**	0.835**
(19:1/18:1/22:6)	962.817	0.949**	-0.849**	-0.645**	-0.645**	0.884**	0.785**	0.813**	0.906**
(19:1/18:2/18:2)	912.801	0.942**	-0.830**	-0.643**	-0.643**	0.864**	0.783**	0.798**	0.899**
(19:1/18:2/22:6)	960.801	0.890**	-0.850**	-0.582**	-0.582**	0.852**	0.724**	0.835**	0.853**
(20:0/17:1/17:1)	904.833	0.595**	-0.454*	-0.377377	-0.377377	0.585**	0.449*	0.388223	0.586**
(20:0e/16:0/16:0)	866.854	0.495*	-0.634**	-0.0832194	-0.0832194	0.503*	0.239825	0.656**	0.429*
(20:0e/18:2/18:2)	914.854	0.644**	-0.752**	-0.368905	-0.368905	0.641**	0.488*	0.789**	0.623**
(20:0e/6:0/11:1)	654.603	-0.537**	0.374546	0.860**	0.860**	-0.507*	-0.774**	-0.36424	-0.624**
(20:0e/6:0/9:0)	628.587	-0.567**	0.422*	0.882**	0.882**	-0.527**	-0.801**	-0.414*	-0.658**
(20:1/18:1/18:1)	935.804	0.870**	-0.763**	-0.694**	-0.694**	0.797**	0.806**	0.814**	0.876**
(20:1/18:1/22:5)	978.848	0.910**	-0.778**	-0.626**	-0.626**	0.850**	0.761**	0.746**	0.881**
(20:1/18:1/22:6)	976.833	0.946**	-0.796**	-0.686**	-0.686**	0.872**	0.823**	0.757**	0.910**
(20:1/18:1/24:0)	1016.96	0.949**	-0.822**	-0.664**	-0.664**	0.875**	0.806**	0.788**	0.912**
(20:1/18:2/22:6)	974.817	0.922**	-0.790**	-0.632**	-0.632**	0.854**	0.777**	0.728**	0.881**
(20:1/20:1/20:5)	978.848	0.834**	-0.711**	-0.593**	-0.593**	0.689**	0.752**	0.708**	0.832**
(20:1/22:5/22:5)	1026.85	0.937**	-0.850**	-0.629**	-0.629**	0.869**	0.778**	0.826**	0.897**
(20:1/22:6/22:6)	1022.82	0.926**	-0.750**	-0.686**	-0.686**	0.836**	0.817**	0.711**	0.899**
(20:1e/18:1/18:2)	919.809	0.877**	-0.866**	-0.570**	-0.570**	0.827**	0.725**	0.866**	0.841**
(20:1e/18:2/18:3)	915.778	0.767**	-0.861**	-0.507*	-0.507*	0.731**	0.610**	0.881**	0.731**
(20:1e/20:5/20:5)	956.807	0.946**	-0.824**	-0.675**	-0.675**	0.895**	0.800**	0.784**	0.911**
(20:1e/6:0/10:1)	621.545	-0.401731	0.208896	0.769**	0.769**	-0.374798	-0.673**	-0.201331	-0.508*
(20:1e/6:0/12:2)	647.561	0.219675	0.00769731	-0.409*	-0.409*	0.147188	0.408*	0.0111722	0.30573
(20:2/18:2/22:6)	972.801	0.912**	-0.880**	-0.608**	-0.608**	0.881**	0.748**	0.863**	0.875**
(20:2/20:5/20:5)	951.744	0.804**	-0.572**	-0.597**	-0.597**	0.724**	0.719**	0.528**	0.795**
(20:2/22:5/22:5)	1024.83	0.911**	-0.810**	-0.624**	-0.624**	0.867**	0.758**	0.777**	0.881**
(20:2/22:6/22:6)	1020.8	0.894**	-0.699**	-0.642**	-0.642**	0.797**	0.775**	0.647**	0.861**
(20:2e/18:2/18:2)	893.796	0.765**	-0.813**	-0.492*	-0.492*	0.714**	0.638**	0.830**	0.746**
(20:3/18:2/22:6)	970.786	0.808**	-0.559**	-0.598**	-0.598**	0.717**	0.710**	0.510*	0.790**
(20:4/22:6/22:6)	1016.77	0.902**	-0.729**	-0.628**	-0.628**	0.822**	0.768**	0.683**	0.866**
(20:4e/20:2/20:2)	962.854	0.937**	-0.862**	-0.625**	-0.625**	0.877**	0.773**	0.837**	0.892**
(20:5/13:0/18:2)	852.708	0.732**	-0.803**	-0.472*	-0.472*	0.665**	0.596**	0.833**	0.706**
(20:5/14:1/20:5)	869.665	0.701**	-0.790**	-0.451*	-0.451*	0.715**	0.562**	0.807**	0.676**
(20:5/18:2/22:5)	951.744	0.911**	-0.759**	-0.616**	-0.616**	0.821**	0.762**	0.736**	0.880**
(20:5/18:2/22:6)	949.728	0.896**	-0.705**	-0.638**	-0.638**	0.806**	0.769**	0.647**	0.855**
(20:5/18:2/23:0)	992.864	0.923**	-0.774**	-0.642**	-0.642**	0.850**	0.778**	0.733**	0.884**
(20:5/20:5/22:6)	971.712	0.929**	-0.778**	-0.660**	-0.660**	0.852**	0.797**	0.742**	0.897**
(22:0/18:2/20:5)	961.822	0.955**	-0.841**	-0.722**	-0.722**	0.893**	0.845**	0.843**	0.935**
(22:1/18:2/18:2)	954.848	0.862**	-0.871**	-0.601**	-0.601**	0.889**	0.674**	0.848**	0.828**
(22:1/18:2/22:6)	1002.85	0.941**	-0.876**	-0.672**	-0.672**	0.886**	0.814**	0.867**	0.913**
(22:1/18:2/23:0)	1028.96	0.951**	-0.900**	-0.644**	-0.644**	0.887**	0.789**	0.869**	0.903**
(22:2/18:2/22:6)	1000.83	0.937**	-0.850**	-0.649**	-0.649**	0.883**	0.790**	0.826**	0.906**
(22:5/17:1/17:1)	922.786	0.940**	-0.816**	-0.654**	-0.654**	0.867**	0.786**	0.769**	0.888**
(22:5/17:1/18:2)	934.786	0.877**	-0.905**	-0.607**	-0.607**	0.889**	0.692**	0.881**	0.828**
(22:5/18:2/22:5)	996.801	0.895**	-0.713**	-0.625**	-0.625**	0.817**	0.753**	0.654**	0.841**
(22:5/18:2/22:6)	994.786	0.925**	-0.764**	-0.644**	-0.644**	0.848**	0.778**	0.714**	0.888**
(22:6/17:1/22:6)	980.77	0.921**	-0.822**	-0.618**	-0.618**	0.847**	0.759**	0.790**	0.873**
(24:0/18:2/18:2)	984.895	0.938**	-0.870**	-0.630**	-0.630**	0.875**	0.778**	0.845**	0.897**
(24:1/18:2/18:2)	982.88	0.894**	-0.814**	-0.605**	-0.605**	0.812**	0.766**	0.844**	0.862**
(24:1/18:2/22:6)	1030.88	0.945**	-0.800**	-0.671**	-0.671**	0.863**	0.803**	0.758**	0.906**
(24:1/18:2/23:0)	1056.99	0.948**	-0.857**	-0.652**	-0.652**	0.877**	0.794**	0.834**	0.912**
(24:1/18:2/24:1)	1068.99	0.948**	-0.863**	-0.651**	-0.651**	0.884**	0.794**	0.835**	0.909**
(25:0/16:0/18:1)	981.882	0.932**	-0.836**	-0.618**	-0.618**	0.868**	0.764**	0.806**	0.891**
(25:0/18:1/18:1)	1002.94	0.939**	-0.868**	-0.636**	-0.636**	0.880**	0.781**	0.843**	0.901**
(25:0/18:1/18:2)	1000.93	0.932**	-0.873**	-0.625**	-0.625**	0.868**	0.773**	0.853**	0.893**
(25:0/18:1/20:4)	1007.9	0.930**	-0.843**	-0.633**	-0.633**	0.880**	0.774**	0.817**	0.893**
(25:0/18:1/22:6)	1048.93	0.906**	-0.755**	-0.613**	-0.613**	0.784**	0.757**	0.689**	0.878**
(25:0/18:2/18:2)	998.911	0.928**	-0.888**	-0.623**	-0.623**	0.872**	0.755**	0.865**	0.886**
(25:0/18:2/20:2)	1009.92	0.924**	-0.833**	-0.618**	-0.618**	0.862**	0.771**	0.815**	0.884**
(25:1/16:0/16:0)	948.895	0.894**	-0.854**	-0.591**	-0.591**	0.854**	0.731**	0.854**	0.862**
(26:0/18:1/18:2)	1014.94	0.945**	-0.820**	-0.651**	-0.651**	0.865**	0.799**	0.783**	0.907**
(26:0/18:1/22:6)	1062.94	0.912**	-0.735**	-0.642**	-0.642**	0.822**	0.772**	0.678**	0.874**
(26:0/18:2/18:2)	1012.93	0.936**	-0.835**	-0.640**	-0.640**	0.879**	0.774**	0.802**	0.900**
(26:0/18:2/22:6)	1060.93	0.879**	-0.710**	-0.607**	-0.607**	0.812**	0.751**	0.637**	0.851**
(26:0/18:2/23:0)	1087.04	0.939**	-0.840**	-0.632**	-0.632**	0.874**	0.777**	0.813**	0.892**
(26:1/10:1/18:2)	900.801	0.716**	-0.772**	-0.498*	-0.498*	0.685**	0.560**	0.802**	0.665**
(26:1/18:1/20:5)	1034.91	0.829**	-0.625**	-0.585**	-0.585**	0.738**	0.715**	0.559**	0.809**
(27:0/18:2/18:2)	1031.9	0.933**	-0.759**	-0.665**	-0.665**	0.827**	0.802**	0.720**	0.897**
(28:0/18:1/18:1)	1044.99	0.943**	-0.831**	-0.647**	-0.647**	0.879**	0.798**	0.795**	0.902**
(28:0/18:1/18:2)	1042.97	0.949**	-0.841**	-0.662**	-0.662**	0.879**	0.803**	0.812**	0.912**
(28:0/18:2/18:2)	1040.96	0.936**	-0.851**	-0.638**	-0.638**	0.887**	0.789**	0.820**	0.895**
(28:0/18:2/22:1)	1099.04	0.932**	-0.859**	-0.625**	-0.625**	0.827**	0.774**	0.845**	0.898**
(28:1/11:2/22:6)	988.833	0.785**	-0.793**	-0.524**	-0.524**	0.703**	0.624**	0.808**	0.768**
(29:0/18:1/18:1)	1059	0.952**	-0.835**	-0.653**	-0.653**	0.860**	0.800**	0.793**	0.903**
(29:0/6:0/18:3)	893.757	0.663**	-0.783**	-0.412*	-0.412*	0.671**	0.519**	0.822**	0.645**
(29:1/10:3/18:2)	921.791	0.949**	-0.830**	-0.649**	-0.649**	0.880**	0.787**	0.786**	0.892**
(29:1/6:0/18:2)	888.801	0.37252	-0.33075	-0.211206	-0.211206	0.525**	0.332493	0.309948	0.328591
(30:0/18:1/18:1)	1073.02	0.943**	-0.817**	-0.650**	-0.650**	0.860**	0.796**	0.788**	0.907**
(37:2e)	652.587	-0.603**	0.424*	0.872**	0.872**	-0.521**	-0.823**	-0.422*	-0.699**
(46:6e)	770.666	-0.445*	0.309298	0.817**	0.817**	-0.437*	-0.729**	-0.397058	-0.556**
(49:0e)	824.807	0.491*	-0.637**	-0.161833	-0.161833	0.440*	0.269243	0.679**	0.450*
(49:2e)	820.775	0.584**	-0.713**	-0.294964	-0.294964	0.546**	0.446*	0.757**	0.560**
(50:3)	846.755	0.620**	-0.457*	-0.438*	-0.438*	0.589**	0.530**	0.466*	0.640**
(50:5e)	828.744	0.508*	-0.690**	-0.26738	-0.26738	0.615**	0.3214	0.730**	0.460*
(50:6e)	831.684	-0.867**	0.759**	0.959**	0.959**	-0.817**	-0.957**	-0.734**	-0.906**
(51:0e)	852.838	0.511*	-0.667**	-0.155751	-0.155751	0.530**	0.292294	0.703**	0.455*
(51:1e)	850.822	0.673**	-0.800**	-0.400759	-0.400759	0.686**	0.505*	0.835**	0.644**
(51:2e)	848.807	0.588**	-0.732**	-0.321017	-0.321017	0.626**	0.426*	0.761**	0.557**
(51:3e)	846.791	0.478*	-0.586**	-0.202153	-0.202153	0.541**	0.30319	0.595**	0.452*
(51:4e)	844.775	0.628**	-0.763**	-0.378057	-0.378057	0.643**	0.485*	0.793**	0.602**
(53:0e)	880.869	0.524**	-0.662**	-0.160014	-0.160014	0.532**	0.30963	0.691**	0.464*
(53:2e)	876.838	0.624**	-0.773**	-0.346768	-0.346768	0.625**	0.469*	0.805**	0.590**
(53:3e)	874.822	0.593**	-0.753**	-0.314143	-0.314143	0.640**	0.400313	0.773**	0.557**
(53:4e)	872.807	0.551**	-0.720**	-0.242717	-0.242717	0.584**	0.357251	0.745**	0.508*
(53:5)	884.77	0.813**	-0.873**	-0.527**	-0.527**	0.801**	0.651**	0.887**	0.780**
(54:0e)	894.885	0.562**	-0.702**	-0.185409	-0.185409	0.572**	0.329855	0.722**	0.503*
(54:6e)	887.746	-0.509*	0.599**	0.752**	0.752**	-0.512*	-0.682**	-0.642**	-0.584**
(55:10)	902.723	0.723**	-0.809**	-0.456*	-0.456*	0.762**	0.584**	0.806**	0.683**
(55:2e)	904.869	0.599**	-0.731**	-0.324769	-0.324769	0.583**	0.481*	0.780**	0.567**
(55:3e)	902.854	0.596**	-0.750**	-0.319234	-0.319234	0.651**	0.430*	0.769**	0.554**
(55:4e)	900.838	0.641**	-0.793**	-0.377555	-0.377555	0.686**	0.469*	0.807**	0.606**
(55:5e)	898.822	0.601**	-0.724**	-0.326969	-0.326969	0.595**	0.484*	0.764**	0.565**
(56:0e)	922.916	0.554**	-0.689**	-0.198922	-0.198922	0.556**	0.361266	0.710**	0.499*
(57:11)	928.739	0.334362	-0.0070118	-0.342628	-0.342628	0.240525	0.382731	-0.0313988	0.332331
(57:1e)	934.916	0.679**	-0.800**	-0.386192	-0.386192	0.683**	0.508*	0.825**	0.641**
(57:2e)	932.9	0.649**	-0.791**	-0.388908	-0.388908	0.663**	0.495*	0.820**	0.618**
(58:2e)	946.916	0.642**	-0.788**	-0.388116	-0.388116	0.654**	0.488*	0.828**	0.615**
(58:3e)	944.9	0.631**	-0.759**	-0.372226	-0.372226	0.619**	0.494*	0.791**	0.611**
(58:4e)	942.885	0.646**	-0.781**	-0.368068	-0.368068	0.668**	0.495*	0.804**	0.610**
(59:2e)	960.932	0.656**	-0.784**	-0.395544	-0.395544	0.669**	0.509*	0.817**	0.629**
(59:3e)	958.916	0.656**	-0.777**	-0.400563	-0.400563	0.706**	0.503*	0.793**	0.622**
(59:5e)	954.885	0.818**	-0.849**	-0.534**	-0.534**	0.789**	0.651**	0.847**	0.789**
(59:6)	966.848	0.942**	-0.823**	-0.650**	-0.650**	0.858**	0.800**	0.794**	0.908**
(59:8)	962.817	0.780**	-0.550**	-0.590**	-0.590**	0.685**	0.708**	0.515*	0.776**
(59:8e)	948.838	0.930**	-0.869**	-0.619**	-0.619**	0.851**	0.767**	0.868**	0.889**
(6:0/18:2/18:2)	715.587	0.362197	-0.520**	0.0277314	0.0277314	0.356316	0.119152	0.560**	0.267478
(60:1e)	976.963	0.667**	-0.804**	-0.398832	-0.398832	0.681**	0.498*	0.829**	0.634**
(60:3e)	972.932	0.647**	-0.788**	-0.39281	-0.39281	0.652**	0.497*	0.819**	0.619**
(61:1)	1009.91	0.924**	-0.833**	-0.618**	-0.618**	0.862**	0.771**	0.815**	0.884**
(61:5e)	982.916	0.704**	-0.773**	-0.434*	-0.434*	0.734**	0.549**	0.773**	0.667**
(61:6e)	980.9	0.902**	-0.837**	-0.596**	-0.596**	0.854**	0.749**	0.813**	0.862**
(61:7e)	978.885	0.852**	-0.862**	-0.569**	-0.569**	0.818**	0.706**	0.876**	0.833**
(62:6e)	994.916	0.932**	-0.875**	-0.624**	-0.624**	0.903**	0.769**	0.839**	0.886**
(63:7e)	1006.92	0.928**	-0.885**	-0.633**	-0.633**	0.870**	0.777**	0.876**	0.885**
(63:9)	1016.86	0.949**	-0.861**	-0.648**	-0.648**	0.876**	0.797**	0.826**	0.908**
(64:10)	1028.86	0.936**	-0.841**	-0.637**	-0.637**	0.858**	0.788**	0.820**	0.896**
(64:7e)	1020.93	0.931**	-0.773**	-0.656**	-0.656**	0.848**	0.794**	0.727**	0.895**
(65:6)	1050.94	0.901**	-0.755**	-0.623**	-0.623**	0.793**	0.755**	0.708**	0.891**
(66:6)	1064.96	0.929**	-0.784**	-0.625**	-0.625**	0.855**	0.773**	0.716**	0.878**
(66:7)	1062.94	0.805**	-0.650**	-0.585**	-0.585**	0.717**	0.701**	0.613**	0.792**
(66:8)	1060.93	0.848**	-0.685**	-0.595**	-0.595**	0.825**	0.694**	0.597**	0.779**
(66:9)	1058.91	0.820**	-0.683**	-0.604**	-0.604**	0.752**	0.706**	0.737**	0.824**
(68:4)	1097.02	0.932**	-0.861**	-0.621**	-0.621**	0.878**	0.778**	0.836**	0.887**
(70:3)	1127.07	0.901**	-0.889**	-0.610**	-0.610**	0.885**	0.723**	0.880**	0.862**
* Significant correlation (p < 0.05). ** Highly significant correlation (p < 0.01)
